# Supplementary material
Source: publisher figshare collection journal article supplement (https://acs.figshare.com/ndownloader/files/26589236)

# Supporting Information

## Electrochemically Enabled, Nickel-Catalyzed Dehydroxylative

### Cross-Coupling of Alcohols with Aryl Halides

Zijian Li,<sup>†,§</sup> Wenxuan Sun,<sup>‡,§</sup> Xianxu Wang,<sup>§</sup> Luyang Li,<sup>§</sup> Yong Zhang,<sup>§</sup> Chao Li<sup>\*,‡,§</sup>

<sup>†</sup>Academy for Advanced Interdisciplinary Studies, Peking University, Beijing, 100871, China

<sup>‡</sup>Tsinghua Institute of Multidisciplinary Biomedical Research, Tsinghua University, Beijing, 100084, China

<sup>§</sup>National Institute of Biological Sciences (NIBS), Beijing, 102206, China

\*Correspondence to: [lichao@nibs.ac.cn](mailto:lichao@nibs.ac.cn)

#### Table of Contents

|                                                                                             |     |
|---------------------------------------------------------------------------------------------|-----|
| General Information.....                                                                    | S2  |
| General Procedure for Electrochemical Dehydroxylative Arylation (General Procedure A) ..... | S3  |
| Graphical Supporting Information .....                                                      | S4  |
| Optimization Details .....                                                                  | S6  |
| Experimental Procedure and Characterization Data .....                                      | S15 |
| An Application of the Electrochemical Dehydroxylative Arylation <sup>[1]</sup> .....        | S36 |
| Mechanistic Studies .....                                                                   | S37 |
| 1. Relative reactivity study .....                                                          | S37 |
| 2. Radical ring opening .....                                                               | S39 |
| 3. 5- <i>exo</i> -trig type cyclization.....                                                | S41 |
| 4. Enantiopurity erosion .....                                                              | S42 |
| 5. Ligand exchange experiments .....                                                        | S44 |
| Cyclic Voltammetry Data .....                                                               | S45 |
| References.....                                                                             | S46 |
| Single Crystal X-ray Diffraction Data .....                                                 | S47 |
| NMR Spectra .....                                                                           | S53 |

## General Information

NMR spectra were recorded on Varian 400 MHz instruments at ambient temperature with CDCl<sub>3</sub> as the solvent unless otherwise stated. Chemical shifts are reported in parts per million relative to CDCl<sub>3</sub> (<sup>1</sup>H,  $\delta$  7.26 for CDCl<sub>3</sub>; <sup>13</sup>C,  $\delta$  77.16 for CDCl<sub>3</sub> unless otherwise stated). Data for <sup>1</sup>H NMR are reported as follows: chemical shift (ppm), multiplicity (s = singlet, d = doublet, t = triplet, q = quartet, m = multiplet, and br = broad), coupling constants (Hz), and integration. High resolution mass spectra (HRMS) were recorded at NIBS Metabolomics Center using an Thermo Scientific Q Exactive HF-X Hybrid Quadrupole-Orbitrap MS. Optical rotations were recorded on an AUTOPOL III digital polarimeter at 589 nm and are recorded as  $[\alpha]_D^{20}$  (concentration in grams/100 mL solvent). Chiral HPLC analysis was performed on an Agilent 1220 series. Analytical thin layer chromatography was performed using 0.25 mm silica gel 60-F plates. Column chromatography was performed using 300-400 mesh silica gel. Yields refer to chromatographically and spectroscopically pure materials, unless otherwise stated. All reactions were carried out under an inert argon atmosphere with dry solvents under anhydrous conditions unless otherwise stated. All glassware was dried in a drying oven before using. Anhydrous NMP (*N*-methyl-2-pyrrolidone), DMF (*N,N*-dimethylformamide), and DMA (*N,N*-dimethylacetamide) were purchased from ACROS or Sigma-Aldrich®. The Peking University X-ray Diffraction Laboratory collected and analyzed all X-ray diffraction data.

## General Procedure for Electrochemical Dehydroxylative Arylation

### (General Procedure A)

#### Part I. Preparation of NiBr<sub>2</sub>•2dtbbpy solution (0.02 M based on Ni).

A screw-capped culture tube charged with a magnetic stir bar was moved into a glove box. NiBr<sub>2</sub> (21.9 mg, 0.1 mmol), **L1** (53.9 mg, 0.2 mmol), and anhydrous NMP (5 mL) were added. The resulting mixture was stirred at 100 °C until a clear green solution was afforded (usually 2 h). (*Note 1*).

#### Part II. Electrochemical dehydroxylative cross-coupling. (*Note 2*)

A reaction tube charged with a magnetic stir bar was moved into a glove box. LiBr (17.4 mg, 0.2 mmol, 1.0 equiv), PPh<sub>3</sub> (7.0 or 3.0 equiv), DIPEA (39.7 μL, 0.24 mmol, 1.2 equiv), aryl bromide (0.6 mmol, 3.0 equiv), alcohol (0.2 mmol, 1.0 equiv), and anhydrous NMP (2 mL) were added. The resulting mixture was stirred until all reactants were completely dissolved (*ca.* 5 minutes). The NiBr<sub>2</sub>•2dtbbpy solution (1 mL) was added before the electrodes were installed (*Note 3*), and the reaction mixture was stirred under a constant current of 4 mA for 14 hours.

The electrodes were rinsed with EtOAc (7 mL). The crude reaction mixture was further diluted with EtOAc (30 mL) (*Note 4*). The resulting mixture was washed with water (40×2 mL) and brine (40 mL) sequentially whereby the aqueous layers were back-extracted with EtOAc (1×40 mL). The combined organic layers were dried over Na<sub>2</sub>SO<sub>4</sub> and concentrated *in vacuo*. Purification by column chromatography followed by further purification by preparative TLC or preparative HPLC afforded the desired product.

*Note 1:* Freshly prepared NiBr<sub>2</sub>•2dtbbpy solution provides the best yield of coupling product.

*Note 2:* This dehydroxylative arylation is recommended to be operated in a glove box, since the reaction is sensitive to the moisture. Otherwise, the PPh<sub>3</sub> could be oxidized on the anode with H<sub>2</sub>O.

*Note 3:* Low density graphite anode was used.

*Note 4:* If the product is not sensitive to H<sub>2</sub>O<sub>2</sub>, a few drops of aq. H<sub>2</sub>O<sub>2</sub> could be added after the completion of the reaction to help the removal of the excess PPh<sub>3</sub>.

## Graphical Supporting Information

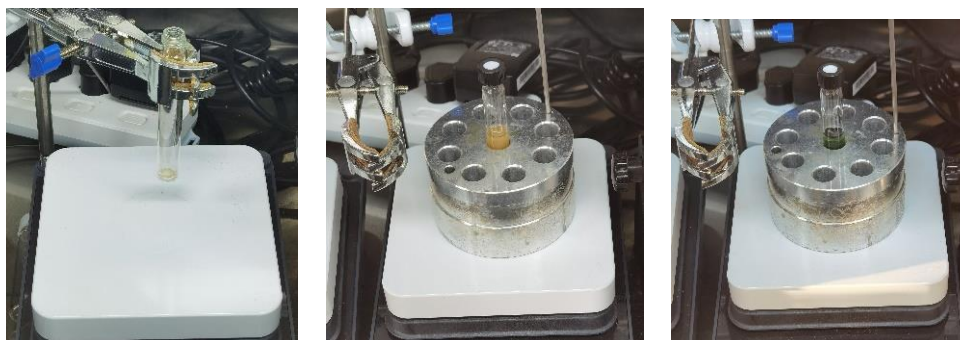

**Figure S1.** Preparation of  $\text{NiBr}_2 \cdot 2\text{dtbbpy}$  solution: (1) A screw-capped culture tube was charged with  $\text{NiBr}_2$  and dtbbpy; (2) The suspension of  $\text{NiBr}_2$  and dtbbpy in NMP was heated to 100 °C; (3) After 2 h stirring, the solution was cooled to room temperature.

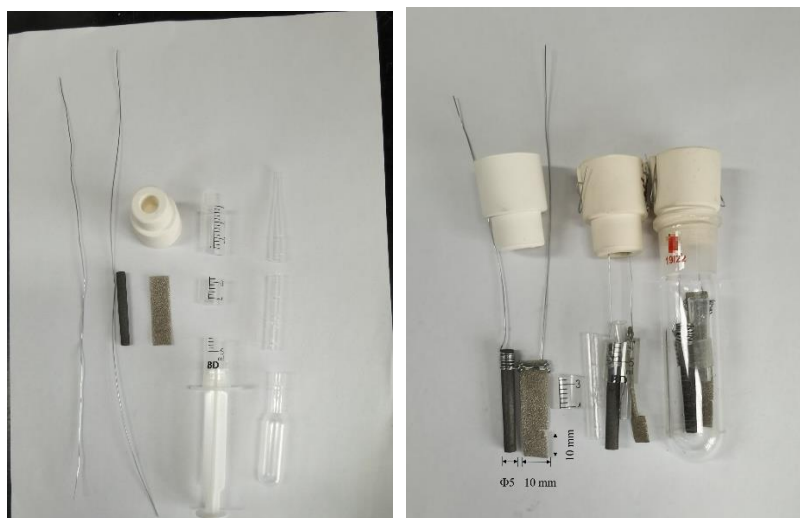

**Figure S2.** Preparation of the electrode: (1) Materials for making the electrodes (from left to right): iron wire, graphite rod, nickel foam, rubber plug, plastic syringe, and plastic pipes; (2) The assembled electrodes.

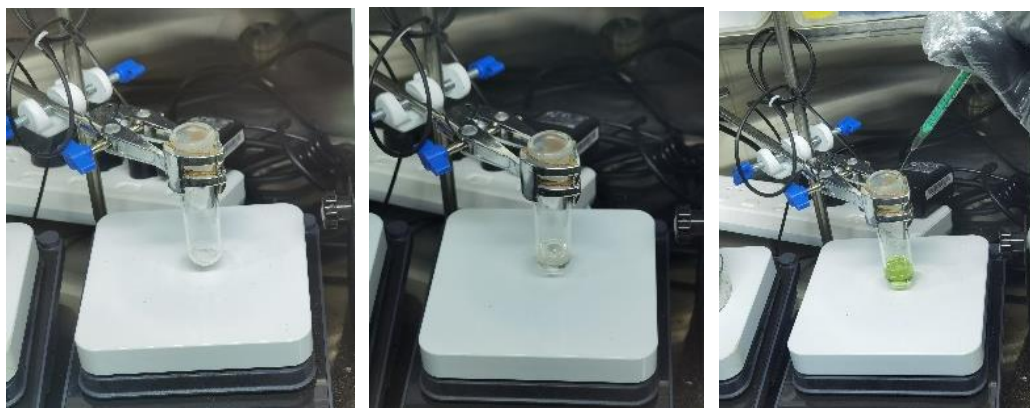

**Figure S3.** From left to right: (1) A reaction tube was charged with LiBr, PPh<sub>3</sub>, DIPEA, PhBr, and alcohol; (2) NMP was added, and the mixture was stirred until all reactants were completely dissolved; (3) The solution of NiBr<sub>2</sub>•2dtbbpy was added.

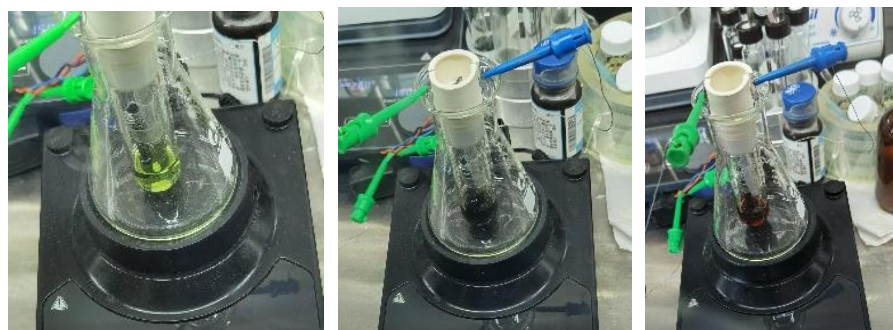

**Figure S4.** From left to right: (1) Starting the reaction on an electrochemical equipment with a constant current of 4 mA (10 mm electrodes were immersed into the reaction solution); (2) After 2 min stirring, the reaction mixture turned black; (3) After 10 h stirring.

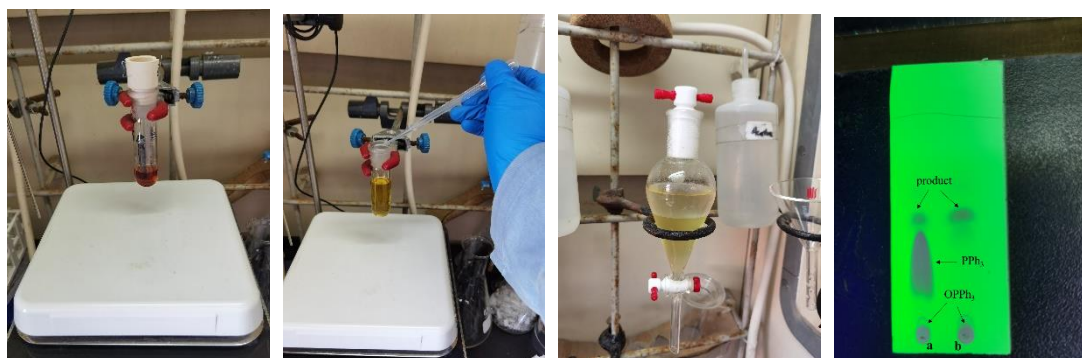

**Figure S5.** From left to right: (1) The reaction mixture; (2) Diluted with EtOAc (adding the aq. H<sub>2</sub>O<sub>2</sub> was optional); (3) Extraction.; (4) TLC: **Lane a**: the reaction mixture; **Lane b**: the reaction mixture after treatment with H<sub>2</sub>O<sub>2</sub>.

## Optimization Details

All reactions were conducted at 0.2 mmol scale.

**Table S1.** Screening of the bases.

| <div style="display: flex; align-items: center; justify-content: center;"> <div style="text-align: center;"> 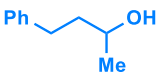 <p><b>1</b><br/>(1 equiv)</p> </div> <div style="margin: 0 10px;">+</div> <div style="text-align: center;"> <p><b>PhBr</b></p> <p><b>2</b><br/>(3 equiv)</p> </div> <div style="margin-left: 20px;"> <p>10 mmol% Ni(COD)<sub>2</sub><br/>20 mmol% dtbbpy<br/>PPh<sub>3</sub> (3 equiv), LiBr (2 equiv)<br/><b>base</b> (1.1 equiv), DMA (4 mL)<br/>5 mA, (+)C/(-)Ni, 12 h</p> </div> <div style="margin-left: 20px;"> <p>→</p> </div> <div style="text-align: center;">  <p><b>3</b></p> </div> </div> |                                     |                        |
|------------------------------------------------------------------------------------------------------------------------------------------------------------------------------------------------------------------------------------------------------------------------------------------------------------------------------------------------------------------------------------------------------------------------------------------------------------------------------------------------------------------------------------------------------------------------------------------------------------------------------------------------------------------------------------------------------------------------------------------------------------------------------------------|-------------------------------------|------------------------|
| Entry                                                                                                                                                                                                                                                                                                                                                                                                                                                                                                                                                                                                                                                                                                                                                                                    | Base                                | Yield (%) <sup>a</sup> |
| 1                                                                                                                                                                                                                                                                                                                                                                                                                                                                                                                                                                                                                                                                                                                                                                                        | w/o base                            | 44                     |
| 2                                                                                                                                                                                                                                                                                                                                                                                                                                                                                                                                                                                                                                                                                                                                                                                        | Li <sub>2</sub> CO <sub>3</sub>     | 45                     |
| 3                                                                                                                                                                                                                                                                                                                                                                                                                                                                                                                                                                                                                                                                                                                                                                                        | Na <sub>2</sub> CO <sub>3</sub>     | 34                     |
| 4                                                                                                                                                                                                                                                                                                                                                                                                                                                                                                                                                                                                                                                                                                                                                                                        | K <sub>2</sub> CO <sub>3</sub>      | 23                     |
| 5                                                                                                                                                                                                                                                                                                                                                                                                                                                                                                                                                                                                                                                                                                                                                                                        | Cs <sub>2</sub> CO <sub>3</sub>     | 27                     |
| 6                                                                                                                                                                                                                                                                                                                                                                                                                                                                                                                                                                                                                                                                                                                                                                                        | NaHCO <sub>3</sub>                  | 12                     |
| 7                                                                                                                                                                                                                                                                                                                                                                                                                                                                                                                                                                                                                                                                                                                                                                                        | K <sub>3</sub> PO <sub>4</sub>      | 0                      |
| 8                                                                                                                                                                                                                                                                                                                                                                                                                                                                                                                                                                                                                                                                                                                                                                                        | K <sub>2</sub> HPO <sub>4</sub>     | 0                      |
| 9                                                                                                                                                                                                                                                                                                                                                                                                                                                                                                                                                                                                                                                                                                                                                                                        | DBU                                 | 40                     |
| 10                                                                                                                                                                                                                                                                                                                                                                                                                                                                                                                                                                                                                                                                                                                                                                                       | 2,6-lutidine                        | 42                     |
| 11                                                                                                                                                                                                                                                                                                                                                                                                                                                                                                                                                                                                                                                                                                                                                                                       | 2,6-di- <i>tert</i> -butyl pyridine | 46                     |
| 12                                                                                                                                                                                                                                                                                                                                                                                                                                                                                                                                                                                                                                                                                                                                                                                       | 2,4,6-collidine                     | 45                     |
| 13                                                                                                                                                                                                                                                                                                                                                                                                                                                                                                                                                                                                                                                                                                                                                                                       | DMAP                                | 50                     |
| 14                                                                                                                                                                                                                                                                                                                                                                                                                                                                                                                                                                                                                                                                                                                                                                                       | <i>N, N'</i> -tetramethylguanidine  | 51                     |
| 15                                                                                                                                                                                                                                                                                                                                                                                                                                                                                                                                                                                                                                                                                                                                                                                       | 1,4-diaza [2.2.2] bicyclooctane     | 46                     |
| 16                                                                                                                                                                                                                                                                                                                                                                                                                                                                                                                                                                                                                                                                                                                                                                                       | TEA                                 | 52                     |
| <b>17</b>                                                                                                                                                                                                                                                                                                                                                                                                                                                                                                                                                                                                                                                                                                                                                                                | <b>DIPEA</b>                        | <b>58</b>              |

<sup>a</sup>Yields were determined by GC-MS with dodecane as the internal standard.

**Table S2.** Screening of the electrolytes.

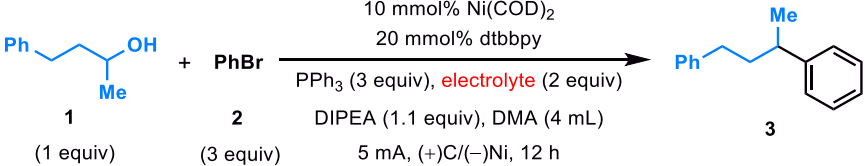

| Entry | Electrolyte         | Yield (%) <sup>a</sup> |
|-------|---------------------|------------------------|
| 1     | Et <sub>4</sub> NBr | 51                     |
| 2     | LiCl                | 0                      |
| 3     | <b>LiBr</b>         | <b>55</b>              |
| 4     | LiI                 | 55                     |
| 5     | LiClO <sub>4</sub>  | 50                     |
| 6     | LiBF <sub>4</sub>   | 36                     |
| 7     | LiPF <sub>6</sub>   | 49                     |

<sup>a</sup>Yields were determined by GC-MS with dodecane as the internal standard.**Table S3.** Optimization of the equivalent of electrolytes.

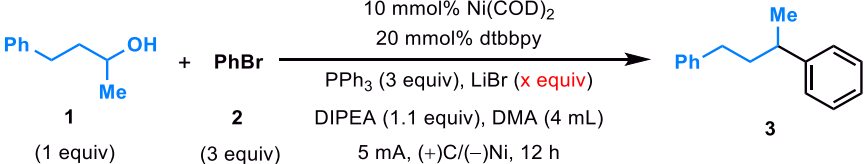

| Entry | Equivalent of Electrolyte | Yield (%) <sup>a</sup> |
|-------|---------------------------|------------------------|
| 1     | 0.5                       | 59                     |
| 2     | <b>1.0</b>                | <b>64</b>              |
| 3     | 2.0                       | 60                     |
| 4     | 3.0                       | 63                     |

<sup>a</sup>Yields were determined by GC-MS with dodecane as the internal standard.**Table S4.** Optimization of the reaction time.

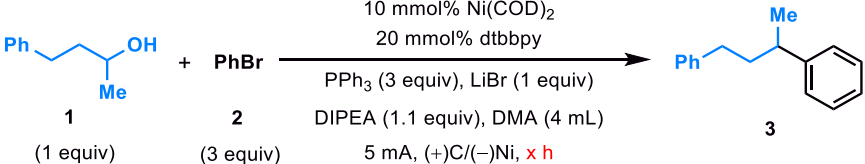

| Entry | Time (h)                 | Yield (%) <sup>a</sup> |
|-------|--------------------------|------------------------|
| 1     | 2.5 (≈2 F/mmol)          | 12                     |
| 2     | 4.0 (≈4 F/mmol)          | 35                     |
| 3     | 6.5 (≈6 F/mmol)          | 51                     |
| 4     | <b>10.5 (≈10 F/mmol)</b> | <b>60</b>              |
| 5     | 12.0 (≈11 F/mmol)        | 57                     |
| 6     | 21.5 (≈20 F/mmol)        | 59                     |

<sup>a</sup>Yields were determined by GC-MS with dodecane as the internal standard.

**Table S5.** Optimization of the equivalent of bases.

| Entry    | Equivalent of Base | Yield (%) <sup>a</sup> |
|----------|--------------------|------------------------|
| 1        | 0.0                | 38                     |
| 2        | 1.0                | 56                     |
| <b>3</b> | <b>1.2</b>         | <b>60</b>              |
| 4        | 2.0                | 62                     |

<sup>a</sup>Yields were determined by GC-MS with dodecane as the internal standard.**Table S6.** Screening of the catalysts.

| Entry    | Catalyst                           | Yield (%) <sup>a</sup> |
|----------|------------------------------------|------------------------|
| 1        | Ni(COD) <sub>2</sub>               | 57                     |
| 2        | Ni(acac) <sub>2</sub>              | 49                     |
| 3        | Co(acac) <sub>2</sub>              | 0                      |
| 4        | Cu(acac) <sub>2</sub>              | 0                      |
| 5        | Fe(acac) <sub>3</sub>              | 0                      |
| 6        | NiCl <sub>2</sub>                  | 50                     |
| <b>7</b> | <b>NiBr<sub>2</sub></b>            | <b>58</b>              |
| 8        | Ni(NO <sub>3</sub> ) <sub>2</sub>  | 38                     |
| 9        | Ni(OAc) <sub>2</sub>               | 35                     |
| 10       | Ni(ClO <sub>4</sub> ) <sub>2</sub> | 47                     |

<sup>a</sup>Yields were determined by GC-MS with dodecane as the internal standard.

**Table S7.** Screening of PPh<sub>3</sub> analogs.

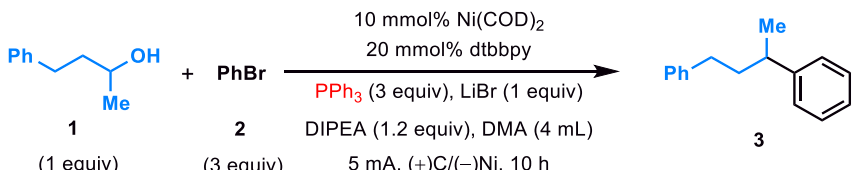

| Entry | PPh <sub>3</sub> Analogs           | Yield (%) <sup>a</sup> |
|-------|------------------------------------|------------------------|
| 1     | PPh <sub>3</sub>                   | 58                     |
| 2     | P(OPh) <sub>3</sub>                | 0                      |
| 3     | P(OEt) <sub>3</sub>                | 0                      |
| 4     | <i>n</i> Bu <sub>3</sub> P         | 0                      |
| 5     | tris( <i>p</i> -tolyl)phosphine    | 62                     |
| 6     | tris(4-methoxyphenyl)phosphine (4) | 44                     |
| 7     | tris(4-fluorophenyl)phosphine (5)  | 48                     |

<sup>a</sup>Yields were determined by GC-MS with dodecane as the internal standard.**Table S8.** Optimization of the reaction concentration.

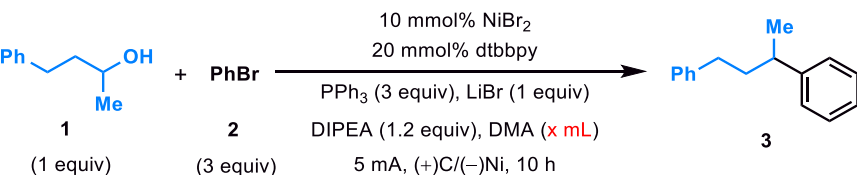

| Entry | Volume of Solvent (concentration of 1) | Yield (%) <sup>a</sup> |
|-------|----------------------------------------|------------------------|
| 1     | 3.0 mL (67 mM)                         | 64                     |
| 2     | 3.5 mL (57 mM)                         | 61                     |
| 3     | 4.0 mL (50 mM)                         | 60                     |
| 4     | 4.5 mL (44 mM)                         | 59                     |
| 5     | 5.0 mL (40 mM)                         | 58                     |

<sup>a</sup>Yields were determined by GC-MS with dodecane as the internal standard.

**Table S9.** Optimization of the equivalent of PPh<sub>3</sub>.

| <div style="display: flex; align-items: center; justify-content: space-around;"> <div style="text-align: center;"> <br/> <b>1</b><br/>           (1 equiv)         </div> <div>+</div> <div style="text-align: center;"> <b>PhBr</b><br/> <b>2</b><br/>           (3 equiv)         </div> <div style="text-align: center;"> <math>\xrightarrow[\text{DIPEA (1.2 equiv), DMA (3 mL)}]{\begin{array}{l} 10 \text{ mmol\% NiBr}_2 \\ 20 \text{ mmol\% dtbbpy} \\ \text{PPh}_3 \text{ (x equiv), LiBr (1 equiv)} \end{array}}</math> </div> <div style="text-align: center;"> <br/> <b>3</b> </div> </div> <p style="text-align: center;">5 mA, (+)C/(-)Ni, 10 h</p> |                                |                            |                            |
|-------------------------------------------------------------------------------------------------------------------------------------------------------------------------------------------------------------------------------------------------------------------------------------------------------------------------------------------------------------------------------------------------------------------------------------------------------------------------------------------------------------------------------------------------------------------------------------------------------------------------------------------------------------------|--------------------------------|----------------------------|----------------------------|
| Entry                                                                                                                                                                                                                                                                                                                                                                                                                                                                                                                                                                                                                                                             | Equivalent of PPh <sub>3</sub> | Yield 1(%) <sup>a, b</sup> | Yield 2(%) <sup>a, c</sup> |
| 1                                                                                                                                                                                                                                                                                                                                                                                                                                                                                                                                                                                                                                                                 | 2.0                            | -                          | 48                         |
| 2                                                                                                                                                                                                                                                                                                                                                                                                                                                                                                                                                                                                                                                                 | 3.0                            | 63                         | 57                         |
| 3                                                                                                                                                                                                                                                                                                                                                                                                                                                                                                                                                                                                                                                                 | 4.0                            | 76                         | 67                         |
| 4                                                                                                                                                                                                                                                                                                                                                                                                                                                                                                                                                                                                                                                                 | 5.0                            | 80                         | 67                         |
| 5                                                                                                                                                                                                                                                                                                                                                                                                                                                                                                                                                                                                                                                                 | 6.0                            | 81                         | 72                         |
| <b>6</b>                                                                                                                                                                                                                                                                                                                                                                                                                                                                                                                                                                                                                                                          | <b>7.0</b>                     | <b>84</b>                  | 81                         |
| 7                                                                                                                                                                                                                                                                                                                                                                                                                                                                                                                                                                                                                                                                 | 8.0                            | 82                         | 76                         |
| 8                                                                                                                                                                                                                                                                                                                                                                                                                                                                                                                                                                                                                                                                 | 9.0                            | 76                         | -                          |

<sup>a</sup>Yields were determined by GC-MS with dodecane as the internal standard;<sup>b</sup>PPh<sub>3</sub> was used;<sup>c</sup>tris(*p*-tolyl)phosphine was used.**Table S10.** Optimization of the equivalent of PhBr.

| <div style="display: flex; align-items: center; justify-content: space-around;"> <div style="text-align: center;"> <br/> <b>1</b><br/>           (1 equiv)         </div> <div>+</div> <div style="text-align: center;"> <b>PhBr</b><br/> <b>2</b><br/>           (x equiv)         </div> <div style="text-align: center;"> <math>\xrightarrow[\text{DIPEA (1.2 equiv), DMA (3 mL)}]{\begin{array}{l} 10 \text{ mmol\% NiBr}_2 \\ 20 \text{ mmol\% dtbbpy} \\ \text{PPh}_3 \text{ (7 equiv), LiBr (1 equiv)} \end{array}}</math> </div> <div style="text-align: center;"> <br/> <b>3</b> </div> </div> <p style="text-align: center;">5 mA, (+)C/(-)Ni, 10 h</p> |                    |                        |
|-------------------------------------------------------------------------------------------------------------------------------------------------------------------------------------------------------------------------------------------------------------------------------------------------------------------------------------------------------------------------------------------------------------------------------------------------------------------------------------------------------------------------------------------------------------------------------------------------------------------------------------------------------------------|--------------------|------------------------|
| Entry                                                                                                                                                                                                                                                                                                                                                                                                                                                                                                                                                                                                                                                             | Equivalent of PhBr | Yield (%) <sup>a</sup> |
| 1                                                                                                                                                                                                                                                                                                                                                                                                                                                                                                                                                                                                                                                                 | 1.0                | 75                     |
| 2                                                                                                                                                                                                                                                                                                                                                                                                                                                                                                                                                                                                                                                                 | 2.0                | 81                     |
| <b>3</b>                                                                                                                                                                                                                                                                                                                                                                                                                                                                                                                                                                                                                                                          | <b>3.0</b>         | <b>82</b>              |
| 4                                                                                                                                                                                                                                                                                                                                                                                                                                                                                                                                                                                                                                                                 | 4.0                | 81                     |
| 5                                                                                                                                                                                                                                                                                                                                                                                                                                                                                                                                                                                                                                                                 | 5.0                | 82                     |

<sup>a</sup>Yields were determined by GC-MS with dodecane as the internal standard.

**Table S11.** Optimization of the equivalent of NiBr<sub>2</sub>•2dtbbpy.

| Entry | Equivalent of NiBr <sub>2</sub> •2dtbbpy | Yield (%) <sup>a</sup> |
|-------|------------------------------------------|------------------------|
| 1     | 3%                                       | 38                     |
| 2     | 5%                                       | 67                     |
| 3     | 7%                                       | 79                     |
| 4     | <b>10%</b>                               | <b>81</b>              |
| 5     | 15%                                      | 76                     |

<sup>a</sup>Yields were determined by GC-MS with dodecane as the internal standard.**Table S12.** Optimization of the current.

| Entry | Current (mA)      | Yield (%) <sup>a</sup> |
|-------|-------------------|------------------------|
| 1     | 3 (18.5 h)        | 75                     |
| 2     | <b>4 (14.0 h)</b> | <b>89</b>              |
| 3     | 5 (10.5 h)        | 81                     |
| 4     | 6 (9.0 h)         | 68                     |
| 5     | 7 (8.0 h)         | 74                     |
| 6     | 8 (7.0 h)         | 79                     |
| 7     | 9 (6.5 h)         | 71                     |
| 8     | 10 (5.5 h)        | 36                     |

<sup>a</sup>Yields were determined by GC-MS with dodecane as the internal standard.

**Table S13.** Screening of the solvents.

| Entry | Solvent | Yield (%) <sup>a</sup> |
|-------|---------|------------------------|
| 1     | DMA     | 89                     |
| 2     | DMF     | 36                     |
| 3     | MeCN    | 33                     |
| 4     | DMSO    | 0                      |
| 5     | THF     | 0                      |
| 6     | NMP     | 92                     |

<sup>a</sup>Yields were determined by GC-MS with dodecane as the internal standard.**Table S14.** Screening of the ligands.

| Entry | Ligand | Yield (%) <sup>a</sup> | Entry | Ligand | Yield (%) <sup>a</sup> |
|-------|--------|------------------------|-------|--------|------------------------|
| 1     | L1     | 92                     | 8     | L8     | 58                     |
| 2     | L2     | 80                     | 9     | L9     | 0                      |
| 3     | L3     | 88                     | 10    | L10    | 0                      |
| 4     | L4     | 86                     | 11    | L11    | 44                     |
| 5     | L5     | 76                     | 12    | L12    | 0                      |
| 6     | L6     | 0                      | 13    | L13    | 0                      |
| 7     | L7     | 66                     | 14    | L14    | 5                      |

<sup>a</sup>Yields were determined by GC-MS with dodecane as the internal standard.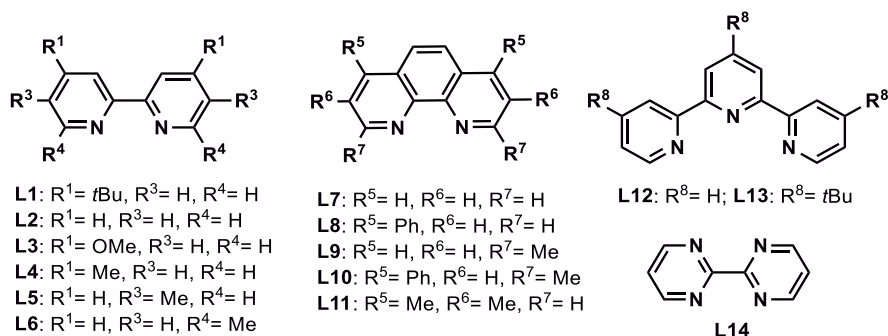

**Table S15.** Other conditions.

| Entry | condition                                         | Yield (%) <sup>a</sup> |
|-------|---------------------------------------------------|------------------------|
| 1     | above                                             | 92                     |
| 2     | no electricity                                    | 0                      |
| 3     | w/o NiBr <sub>2</sub>                             | 0                      |
| 4     | w/o <b>L1</b>                                     | 0                      |
| 5     | w/o PPh <sub>3</sub>                              | 0                      |
| 6     | RVC instead of graphite                           | 14                     |
| 7     | 2 mA, 28 h                                        | 94                     |
| 8     | 6 mA, 9 h                                         | 84                     |
| 9     | LiClO <sub>4</sub> instead of LiBr                | 86                     |
| 10    | Et <sub>4</sub> NBr instead of LiBr               | 84                     |
| 11    | Ni(COD) <sub>2</sub> instead of NiBr <sub>2</sub> | 85                     |
| 12    | <b>L2</b> instead of <b>L1</b>                    | 80                     |
| 13    | <b>L3</b> instead of <b>L1</b>                    | 88                     |
| 14    | 10 mmol% <b>L1</b>                                | 80                     |
| 15    | w/o DIPEA                                         | 47                     |
| 16    | PPh <sub>3</sub> (3 equiv)                        | 70                     |
| 17    | <b>4</b> instead of PPh <sub>3</sub>              | 78                     |
| 18    | <b>5</b> instead of PPh <sub>3</sub>              | 57                     |
| 19    | DMA instead of NMP                                | 89                     |
| 20    | PhBr (2 equiv)                                    | 89                     |
| 21    | PhOTf instead of <b>2</b>                         | 92                     |
| 22    | PhCl instead of <b>2</b>                          | 36                     |
| 23    | PhI instead of <b>2</b>                           | 63                     |

<sup>a</sup>Yields were determined by GC-MS with dodecane as the internal standard.

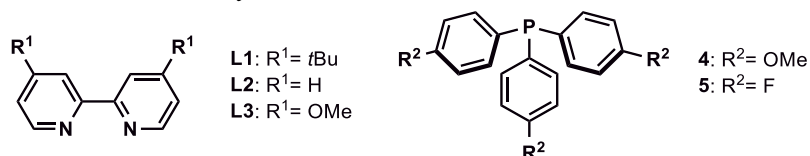

**The major byproduct in the electrochemical dehydroxylative arylation of alcohol 1**

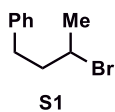

**Physical state:** colorless oil;

**TLC:**  $R_f$  = 0.57 (silica gel, Petroleum Ether, UV);

**$^1\text{H}$  NMR** (400 MHz,  $\text{CDCl}_3$ ):  $\delta$  7.32–7.27 (m, 2H), 7.24–7.17 (m, 3H), 4.12–4.04 (m, 1H), 2.90–2.83 (m, 1H), 2.79–2.71 (m, 1H), 2.19–2.00 (m, 2H), 1.73 (d,  $J$  = 6.7 Hz, 3H) ppm;

**$^{13}\text{C}$  NMR** (101 MHz,  $\text{CDCl}_3$ ):  $\delta$  141.0, 128.6, 128.6, 126.2, 51.0, 42.8, 34.1, 26.7 ppm;

**HRMS** (APCI): Calcd for  $\text{C}_{10}\text{H}_{17}\text{BrN}$   $[\text{M}+\text{NH}_4]^+$ : 230.0539; found 230.0537.

## Experimental Procedure and Characterization Data

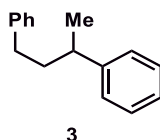

On 0.2 mmol scale, **General Procedure A** was followed with 4-phenylbutan-2-ol, bromobenzene, and triphenylphosphine (7.0 equiv). Purification by column chromatography (silica gel, Petroleum Ether) afforded crude **3**. Further purification by preparative TLC (silica gel, Petroleum ether) afforded **3** (37.8 mg, 90%).

**Physical state:** colorless oil;

**TLC:**  $R_f$  = 0.57 (silica gel, Petroleum Ether, UV);

**$^1\text{H}$  NMR** (400 MHz,  $\text{CDCl}_3$ ):  $\delta$  7.36–7.26 (m, 4H), 7.25–7.11 (m, 6H), 2.77–2.68 (m, 1H), 2.57–2.45 (m, 2H), 2.01–1.82 (m, 2H), 1.28 (d,  $J$  = 7.0 Hz, 3H) ppm;

**$^{13}\text{C}$  NMR** (101 MHz,  $\text{CDCl}_3$ ):  $\delta$  147.4, 142.7, 128.5, 128.5, 128.4, 127.2, 126.1, 125.8, 40.1, 39.6, 34.1, 22.7 ppm;

**HRMS** (ESI): Calcd for  $\text{C}_{16}\text{H}_{19}$   $[\text{M}+\text{H}]^+$ : 211.1481; found 211.1483.

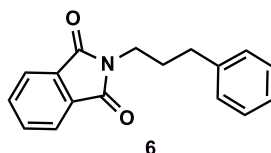

On 0.2 mmol scale, **General Procedure A** was followed with 3-phthalimido-1-propanol, bromobenzene, and triphenylphosphine (7.0 equiv). Purification by column chromatography (silica gel,  $\text{CH}_2\text{Cl}_2$ ) afforded crude **6**. Further purification by preparative TLC (silica gel, 1:4, EtOAc:Petroleum ether) afforded **6** (30.2 mg, 57%).

**Physical state:** white amorphous solid;

**TLC:**  $R_f$  = 0.50 (silica gel, 1:10, EtOAc:Petroleum Ether, UV);

**$^1\text{H}$  NMR** (400 MHz,  $\text{CDCl}_3$ ):  $\delta$  7.84–7.80 (m, 2H), 7.73–7.67 (m, 2H), 7.28–7.22 (m, 2H), 7.22–7.18 (m, 2H), 7.17–7.11 (m, 1H), 3.75 (t,  $J$  = 7.2, 2H), 2.69 (t,  $J$  = 8.1, 2H), 2.07–1.99 (m, 2H) ppm;

**$^{13}\text{C}$  NMR** (101 MHz,  $\text{CDCl}_3$ ):  $\delta$  168.6, 141.2, 134.0, 132.3, 128.5, 128.4, 126.1, 123.3, 38.0, 33.3, 30.0 ppm;

**HRMS** (ESI): Calcd for  $\text{C}_{17}\text{H}_{16}\text{NO}_2$   $[\text{M}+\text{H}]^+$ : 266.1176; found 266.1175.

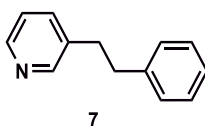

On 0.2 mmol scale, without treatment by hydrogen peroxide, **General Procedure A** was followed with 3-pyridinylethanol, bromobenzene, and triphenylphosphine (7.0 equiv). Purification by column chromatography (silica gel, 0:100 to 2:3 EtOAc: Petroleum Ether) afforded crude **7**. Further purification by preparative TLC (silica gel, 2:3, EtOAc:Petroleum ether) afforded **7** (26.4 mg, 72%).

**Physical state:** white amorphous solid;

**TLC:**  $R_f$  = 0.51 (silica gel, 2:3, EtOAc:Petroleum Ether, UV);

**$^1\text{H}$  NMR** (400 MHz,  $\text{CDCl}_3$ ):  $\delta$  8.46–8.41 (m, 2H), 7.43 (dt,  $J$  = 7.8, 2.0 Hz, 1H), 7.31–7.25 (m, 2H), 7.23–7.17 (m, 2H), 7.17–7.12 (m, 2H), 2.92 (s, 4H) ppm;

**$^{13}\text{C}$  NMR** (101 MHz,  $\text{CDCl}_3$ ):  $\delta$  149.7, 147.2, 140.8, 137.1, 136.4, 128.6, 126.3, 123.4, 37.5, 35.0 ppm;

**HRMS** (ESI): Calcd for  $\text{C}_{13}\text{H}_{14}\text{N}$   $[\text{M}+\text{H}]^+$ : 184.1121; found 184.1121.

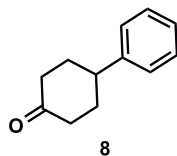

On 0.2 mmol scale, **General Procedure A** was followed with 4-hydroxycyclohexanone, bromobenzene, and triphenylphosphine (7.0 equiv). Purification by column chromatography (silica gel, 0:100 to 1:1  $\text{CH}_2\text{Cl}_2$ :Petroleum Ether) afforded **8** (21.3 mg, 61%).

**Physical state:** white amorphous solid;

**TLC:**  $R_f$  = 0.50 (silica gel,  $\text{CH}_2\text{Cl}_2$ , UV);

**$^1\text{H}$  NMR** (400 MHz,  $\text{CDCl}_3$ ):  $\delta$  7.36–7.29 (m, 2H), 7.28–7.20 (m, 3H), 3.03 (tt,  $J$  = 12.2, 3.7 Hz, 1H), 2.58–2.44 (m, 4H), 2.32–2.19 (m, 2H), 2.01–1.89 (m, 2H) ppm;

**$^{13}\text{C}$  NMR** (101 MHz,  $\text{CDCl}_3$ ):  $\delta$  211.4, 144.9, 128.7, 126.8, 126.7, 42.9, 41.5, 34.1 ppm;

**HRMS** (ESI): Calcd for  $\text{C}_{12}\text{H}_{15}\text{O}$   $[\text{M}+\text{H}]^+$ : 175.1117; found 175.1117.

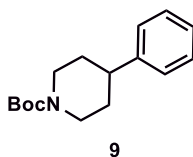

On 0.2 mmol scale, **General Procedure A** was followed with *N*-Boc-4-piperidinol, bromobenzene, and triphenylphosphine (7.0 equiv). Purification by column chromatography (silica gel,  $\text{CH}_2\text{Cl}_2$ ) afforded crude **9**. Further purification by preparative TLC (silica gel, 1:9, EtOAc:Petroleum ether) afforded **9** (29.8 mg, 57%).

**Physical state:** colorless oil;

**TLC:**  $R_f$  = 0.46 (silica gel, 1:9, EtOAc:Petroleum Ether, UV);

**$^1\text{H}$  NMR** (400 MHz,  $\text{CDCl}_3$ ):  $\delta$  7.34–7.28 (m, 2H), 7.24–7.18 (m, 3H), 4.25 (d,  $J$  = 13.3 Hz, 2H), 2.80 (dt,  $J$  = 13.0, 2.6 Hz, 2H), 2.64 (tt,  $J$  = 12.2, 3.6 Hz, 1H), 1.86–1.78 (m, 2H), 1.69–1.56 (m, 2H), 1.48 (s, 9H) ppm;

**$^{13}\text{C}$  NMR** (101 MHz,  $\text{CDCl}_3$ ):  $\delta$  155.0, 145.9, 128.6, 126.9, 126.5, 79.6, 44.5, 42.9, 33.3, 28.6 ppm;

**HRMS** (ESI): Calcd for  $\text{C}_{16}\text{H}_{23}\text{NNaO}_2$   $[\text{M}+\text{Na}]^+$ : 284.1621; found 284.1619.

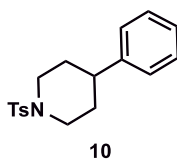

On 0.2 mmol scale, without treatment by hydrogen peroxide, **General Procedure A** was followed with 1-(4-methylphenyl)sulfonylpiperidin-4-ol, bromobenzene, and triphenylphosphine (7.0 equiv). Purification by column chromatography (silica gel, 0:100 to 1:9 EtOAc:Petroleum Ether) afforded

crude **10**, which was further treated by *m*-CPBA to removal of the alkene byproduct. Further purification by preparative TLC (silica gel, 1:4, EtOAc:Petroleum ether) afforded **10** (25.9 mg, 41%).

**Physical state:** white amorphous solid;

**TLC:**  $R_f$  = 0.50 (silica gel, 1:4, EtOAc:Petroleum Ether, UV);

**$^1\text{H}$  NMR** (400 MHz,  $\text{CDCl}_3$ ):  $\delta$  7.70–7.67 (m, 2H), 7.37–7.33 (m, 2H), 7.32–7.27 (m, 2H), 7.24–7.18 (m, 1H), 7.16–7.12 (m, 2H), 3.97–3.91 (m, 2H), 2.45 (s, 3H), 2.44–2.39 (m, 1H), 2.39–2.30 (m, 2H), 1.93–1.78 (m, 4H) ppm;

**$^{13}\text{C}$  NMR** (101 MHz,  $\text{CDCl}_3$ ):  $\delta$  145.0, 143.6, 133.2, 129.8, 128.7, 127.9, 126.8, 126.7, 47.0, 42.0, 32.7, 21.7 ppm;

**HRMS** (ESI): Calcd for  $\text{C}_{18}\text{H}_{22}\text{NO}_2\text{S}$   $[\text{M}+\text{H}]^+$ : 316.1366; found 316.1367.

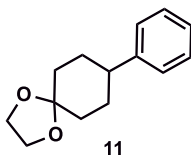

On 0.2 mmol scale, **General Procedure A** was followed with 4,4-ethylene-dioxycyclohexan-1-ol, bromobenzene, and triphenylphosphine (7.0 equiv). Purification by column chromatography (silica gel, 0:100 to 1:10 EtOAc:Petroleum Ether) afforded crude **11**. Further purification by preparative TLC (silica gel, 1:10, EtOAc:Petroleum ether) afforded **11** (19.6 mg, 45%).

**Physical state:** white amorphous solid;

**TLC:**  $R_f$  = 0.45 (silica gel, 1:10, EtOAc:Petroleum Ether, Phosphomolybdic Acid);

**$^1\text{H}$  NMR** (400 MHz,  $\text{CDCl}_3$ ):  $\delta$  7.35–7.26 (m, 2H), 7.26–7.16 (m, 3H), 3.99 (s, 4H), 2.61–2.49 (m, 1H), 1.91–1.84 (m, 4H), 1.83–1.74 (m, 2H), 1.74–1.65 (m, 2H) ppm;

**$^{13}\text{C}$  NMR** (101 MHz,  $\text{CDCl}_3$ ):  $\delta$  146.7, 128.5, 127.0, 126.2, 108.6, 64.5, 64.4, 43.5, 35.3, 31.7 ppm;

**HRMS** (ESI): Calcd for  $\text{C}_{14}\text{H}_{19}\text{O}_2$   $[\text{M}+\text{H}]^+$ : 219.1380; found 219.1381.

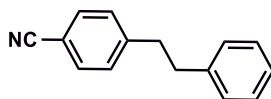

**12**

On 0.2 mmol scale, without treatment by hydrogen peroxide, **General Procedure A** was followed with 2-(4-cyanophenyl)ethanol, bromobenzene, and triphenylphosphine (3.0 equiv). Purification by column chromatography (silica gel, 0:100 to 3:17 EtOAc: Petroleum Ether) afforded crude **12**. Further purification by preparative TLC (silica gel, 1:9, EtOAc:Petroleum ether) afforded **12** (24.9 mg, 60%).

**Physical state:** white amorphous solid;

**TLC:**  $R_f$  = 0.68 (silica gel, 1:4, EtOAc:Petroleum Ether, UV);

**$^1\text{H}$  NMR** (400 MHz,  $\text{CDCl}_3$ ):  $\delta$  7.57–7.53 (m, 2H), 7.30–7.27 (m, 1H), 7.26–7.24 (m, 2H), 7.23–7.18 (m, 2H), 7.14–7.11 (m, 2H), 3.03–2.89 (m, 4H) ppm;

**$^{13}\text{C}$  NMR** (101 MHz,  $\text{CDCl}_3$ ):  $\delta$  147.3, 140.7, 132.3, 129.5, 128.6, 128.5, 126.4, 119.2, 109.9, 38.0, 37.3 ppm;

**HRMS** (ESI): Calcd for  $\text{C}_{15}\text{H}_{14}\text{N}$   $[\text{M}+\text{H}]^+$ : 208.1121; found 208.1119.

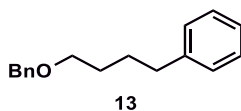

On 0.2 mmol scale, **General Procedure A** was followed with 4-benzyloxy-butan-1-ol, bromobenzene, and triphenylphosphine (7.0 equiv). Purification by column chromatography (silica gel, 0:100 to 1:19 EtOAc:Petroleum Ether) afforded crude **13**. Further purification by preparative HPLC (83% to 98% CH<sub>3</sub>CN/water) afforded **13** (20.2 mg, 42%).

**Physical state:** colorless oil;

**TLC:**  $R_f$  = 0.47 (silica gel, 1:19, EtOAc:Petroleum Ether, UV);

**<sup>1</sup>H NMR** (400 MHz, CDCl<sub>3</sub>):  $\delta$  7.40–7.32 (m, 4H), 7.31–7.25 (m, 3H), 7.20–7.15 (m, 3H), 4.50 (s, 2H), 3.49 (t,  $J$  = 6.2 Hz, 2H), 2.63 (t,  $J$  = 7.3 Hz, 2H), 1.76–1.63 (m, 4H) ppm;

**<sup>13</sup>C NMR** (101 MHz, CDCl<sub>3</sub>):  $\delta$  142.6, 138.8, 128.6, 128.5, 128.4, 127.8, 127.7, 125.8, 73.1, 70.4, 35.9, 29.6, 28.2 ppm;

**HRMS** (ESI): Calcd for C<sub>17</sub>H<sub>24</sub>NO [M+NH<sub>4</sub>]<sup>+</sup>: 258.1852; found 258.1853.

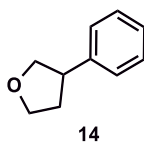

On 0.2 mmol scale, without treatment by hydrogen peroxide, **General Procedure A** was followed with 3-hydroxytetrahydrofuran, bromobenzene, and triphenylphosphine (3.0 equiv). Purification by column chromatography (silica gel, hexane) afforded crude **14**. Further purification by preparative TLC (silica gel, 3:97, EtOAc:Petroleum ether) afforded **14** (19.6 mg, 66%).

**Physical state:** yellow oil;

**TLC:**  $R_f$  = 0.50 (silica gel, 1:9, EtOAc:Petroleum Ether, UV);

**<sup>1</sup>H NMR** (400 MHz, CDCl<sub>3</sub>):  $\delta$  7.35–7.29 (m, 2H), 7.28–7.21 (m, 3H), 4.16 (dd,  $J$  = 8.4, 7.5 Hz, 1H), 4.08 (dt,  $J$  = 8.3, 4.5 Hz, 1H), 3.93 (dt,  $J$  = 8.3, 7.3 Hz, 1H), 3.74 (dd,  $J$  = 8.4, 7.6 Hz, 1H), 3.46–3.36 (m, 1H), 2.42–2.31 (m, 1H), 2.07–1.97 (m, 1H) ppm;

**<sup>13</sup>C NMR** (101 MHz, CDCl<sub>3</sub>):  $\delta$  142.8, 128.7, 127.4, 126.6, 74.8, 68.7, 45.1, 34.8 ppm;

**HRMS** (ESI): Calcd for C<sub>10</sub>H<sub>11</sub>O [M–H]<sup>–</sup>: 147.0815; found 147.0820.

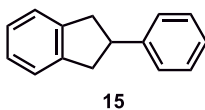

On 0.2 mmol scale, **General Procedure A** was followed with indan-2-ol, bromobenzene, and triphenylphosphine (3.0 equiv). Purification by column chromatography (silica gel, Petroleum Ether) afforded crude **15**. Further purification by preparative TLC (silica gel, Petroleum Ether) afforded **15** (28.8 mg, 74%).

**Physical state:** colorless oil;

**TLC:**  $R_f$  = 0.49 (silica gel, Petroleum Ether, UV);

**<sup>1</sup>H NMR** (400 MHz, CDCl<sub>3</sub>):  $\delta$  7.32 (d,  $J$  = 4.4 Hz, 4H), 7.28–7.22 (m, 3H), 7.22–7.16 (m, 2H), 3.75–3.65 (m, 1H), 3.36 (dd,  $J$  = 15.3, 8.2 Hz, 2H), 3.10 (dd,  $J$  = 15.5, 9.0 Hz, 2H) ppm;

**<sup>13</sup>C NMR** (101 MHz, CDCl<sub>3</sub>):  $\delta$  145.6, 143.1, 128.6, 127.2, 126.6, 126.3, 124.5, 45.7, 41.1 ppm;

**HRMS** (ESI): Calcd for C<sub>15</sub>H<sub>14</sub>Na [M+Na]<sup>+</sup>: 217.0988; found 217.0979.

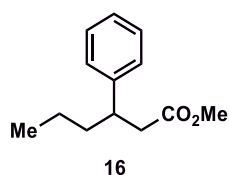

On 0.2 mmol scale, **General Procedure A** was followed with methyl 3-hydroxy-hexanoate, bromobenzene, and triphenylphosphine (7.0 equiv). Purification by column chromatography (silica gel, 0:100 to 3:47 EtOAc:Petroleum Ether) afforded **16** (30.1 mg, 73%).

**Physical state:** yellow oil;

**TLC:**  $R_f$  = 0.53 (silica gel, 1:19, EtOAc:Petroleum Ether, UV);

**$^1\text{H}$  NMR** (400 MHz,  $\text{CDCl}_3$ ):  $\delta$  7.32–7.27 (m, 2H), 7.23–7.15 (m, 3H), 3.58 (s, 3H), 3.15–3.07 (m, 1H), 2.68–2.54 (m, 2H), 1.66–1.55 (m, 2H), 1.24–1.12 (m, 2H), 0.86 (t,  $J$  = 7.3 Hz, 3H) ppm;

**$^{13}\text{C}$  NMR** (101 MHz,  $\text{CDCl}_3$ ):  $\delta$  173.1, 144.3, 128.5, 127.6, 126.5, 51.6, 42.1, 41.8, 38.5, 20.6, 14.1 ppm;

**HRMS** (ESI): Calcd for  $\text{C}_{13}\text{H}_{19}\text{O}_2$   $[\text{M}+\text{H}]^+$ : 207.1380; found 207.1380.

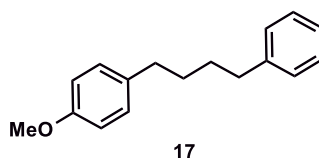

On 0.2 mmol scale, **General Procedure A** was followed with 4-(4-methoxyphenyl) butan-1-ol, bromobenzene, and triphenylphosphine (7.0 equiv). Purification by column chromatography (silica gel, 0:100 to 1:99 EtOAc:hexane) afforded crude **17**. Further purification by preparative TLC (silica gel, hexane) afforded **17** (25.0 mg, 52%).

**Physical state:** white amorphous solid;

**TLC:**  $R_f$  = 0.40 (silica gel, 1:99, EtOAc:Petroleum Ether, UV);

**$^1\text{H}$  NMR** (400 MHz,  $\text{CDCl}_3$ ):  $\delta$  7.30–7.24 (m, 2H), 7.20–7.15 (m, 3H), 7.10–7.06 (m, 2H), 6.87–6.79 (m, 2H), 3.79 (s, 3H), 2.67–2.55 (m, 4H), 1.70–1.58 (m, 4H) ppm;

**$^{13}\text{C}$  NMR** (101 MHz,  $\text{CDCl}_3$ ):  $\delta$  157.8, 142.8, 134.8, 129.4, 128.6, 128.4, 125.8, 113.8, 55.4, 36.0, 35.0, 31.5, 31.2 ppm;

**HRMS** (ESI): Calcd for  $\text{C}_{17}\text{H}_{21}\text{O}$   $[\text{M}+\text{H}]^+$ : 241.1587; found 241.1584.

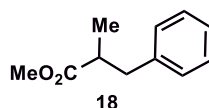

On 0.2 mmol scale, **General Procedure A** was followed with 3-hydroxy-2-methyl propionate, bromobenzene, and triphenylphosphine (3.0 equiv). Purification by column chromatography (silica gel,  $\text{CH}_2\text{Cl}_2$ ) afforded crude **18**. Further purification by preparative TLC (silica gel, 1:19, EtOAc:Petroleum ether) afforded **18** (14.2 mg, 40%).

**Physical state:** colorless oil;

**TLC:**  $R_f$  = 0.58 (silica gel, 1:9, EtOAc:Petroleum Ether, UV);

**$^1\text{H}$  NMR** (400 MHz,  $\text{CDCl}_3$ ):  $\delta$  7.31–7.25 (m, 2H), 7.23–7.19 (m, 1H), 7.19–7.13 (m, 2H), 3.64 (s, 3H), 3.03 (dd,  $J$  = 13.1, 6.5 Hz, 1H), 2.80–2.62 (m, 2H), 1.16 (d,  $J$  = 6.8 Hz, 3H) ppm;

$^{13}\text{C}$  NMR (101 MHz,  $\text{CDCl}_3$ ):  $\delta$  176.7, 139.5, 129.1, 128.5, 126.5, 51.7, 41.6, 39.8, 16.9 ppm;

HRMS (ESI): Calcd for  $\text{C}_{11}\text{H}_{15}\text{O}_2$   $[\text{M}+\text{H}]^+$ : 179.1067; found 179.1066.

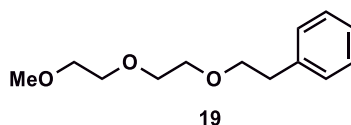

On 0.2 mmol scale, **General Procedure A** was followed with triethylene glucol monomethyl ether, bromobenzene, and triphenylphosphine (7.0 equiv). Purification by column chromatography (silica gel, 1:5, EtOAc:Petroleum Ether) afforded **19** (32.9 mg, 73%).

**Physical state:** yellow oil;

**TLC:**  $R_f$  = 0.57 (silica gel, 2:3, EtOAc:Petroleum Ether, UV);

$^1\text{H}$  NMR (400 MHz,  $\text{CDCl}_3$ ):  $\delta$  7.33–7.24 (m, 2H), 7.24–7.16 (m, 3H), 3.69 (t,  $J$  = 7.3 Hz, 2H), 3.67–3.61 (m, 6H), 3.56–3.53 (m, 2H), 3.38 (s, 3H), 2.91 (t,  $J$  = 7.3 Hz, 2H) ppm;

$^{13}\text{C}$  NMR (101 MHz,  $\text{CDCl}_3$ ):  $\delta$  139.0, 129.0, 128.4, 126.3, 72.4, 72.1, 70.7, 70.7, 70.4, 59.1, 36.4 ppm;

HRMS (ESI): Calcd for  $\text{C}_{13}\text{H}_{21}\text{O}_3$   $[\text{M}+\text{H}]^+$ : 225.1485; found 225.1485.

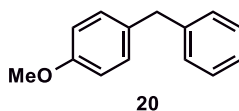

On 0.2 mmol scale, without treatment by hydrogen peroxide, **General Procedure A** was followed with 4-methoxybenzyl alcohol, bromobenzene, and triphenylphosphine (7.0 equiv). Purification by column chromatography (silica gel, 0:100 to 1:33 EtOAc: Petroleum Ether) afforded **20** (37.3 mg, 94%).

**Physical state:** yellow oil;

**TLC:**  $R_f$  = 0.34 (silica gel, 1:33, EtOAc:Petroleum Ether, UV);

$^1\text{H}$  NMR (400 MHz,  $\text{CDCl}_3$ ):  $\delta$  7.34–7.28 (m, 2H), 7.25–7.19 (m, 3H), 7.16–7.12 (m, 2H), 6.89–6.84 (m, 2H), 3.96 (s, 2H), 3.81 (s, 3H) ppm;

$^{13}\text{C}$  NMR (101 MHz,  $\text{CDCl}_3$ ):  $\delta$  158.1, 141.7, 133.4, 130.0, 128.9, 128.6, 126.1, 114.0, 55.4, 41.2 ppm;

HRMS (ESI): Calcd for  $\text{C}_{14}\text{H}_{15}\text{O}$   $[\text{M}+\text{H}]^+$ : 199.1117; found 199.1115.

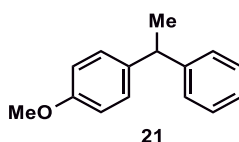

On 0.2 mmol scale, **General Procedure A** was followed with 1-(4-methoxyphenyl)-ethanol, bromobenzene, and triphenylphosphine (3.0 equiv). Purification by column chromatography (silica gel, 1:99  $\text{CH}_2\text{Cl}_2$ :Petroleum Ether) afforded crude **21**. Further purification by preparative TLC (silica gel, 1:19, EtOAc:Petroleum ether) afforded **21** (26.7 mg, 63%).

**Physical state:** yellow oil;

**TLC:**  $R_f$  = 0.60 (silica gel, 1:19, EtOAc:Petroleum Ether, UV);

$^1\text{H}$  NMR (400 MHz,  $\text{CDCl}_3$ ):  $\delta$  7.32–7.26 (m, 2H), 7.24–7.18 (m, 3H), 7.17–7.13 (m, 2H),

6.86–6.82 (m, 2H), 4.12 (q,  $J = 7.2$  Hz, 1H), 3.79 (s, 3H), 1.63 (d,  $J = 7.2$  Hz, 3H) ppm;  
 $^{13}\text{C}$  NMR (101 MHz,  $\text{CDCl}_3$ ):  $\delta$  158.0, 146.9, 138.7, 128.6, 128.5, 127.7, 126.1, 113.8, 55.4, 44.1, 22.2 ppm;  
HRMS (ESI): Calcd for  $\text{C}_{15}\text{H}_{17}\text{O}$   $[\text{M}+\text{H}]^+$ : 213.1274; found 213.1275.

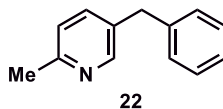

On 0.2 mmol scale, without treatment by hydrogen peroxide, **General Procedure A** was followed with 6-methyl-3-pyridinemethanol, bromobenzene, and triphenyl-phosphine (3.0 equiv). Purification by column chromatography (silica gel, 0:100 to 1:3 EtOAc:Petroleum Ether) afforded **22** (34.8 mg, 95%).

**Physical state:** white amorphous solid;

**TLC:**  $R_f = 0.42$  (silica gel, 2:3, EtOAc:Petroleum Ether, UV);

$^1\text{H}$  NMR (400 MHz,  $\text{CDCl}_3$ ):  $\delta$  8.39 (d,  $J = 2.4$  Hz, 1H), 7.40 (dd,  $J = 7.9, 2.4$  Hz, 1H), 7.32–7.27 (m, 2H), 7.24–7.14 (m, 3H), 7.09 (d,  $J = 8.0$  Hz, 1H), 3.95 (s, 2H), 2.55 (s, 3H) ppm;

$^{13}\text{C}$  NMR (101 MHz,  $\text{CDCl}_3$ ):  $\delta$  156.2, 149.2, 140.2, 137.0, 133.5, 128.9, 128.7, 126.5, 123.2, 38.7, 24.0 ppm;

HRMS (ESI): Calcd for  $\text{C}_{13}\text{H}_{14}\text{N}$   $[\text{M}+\text{H}]^+$ : 184.1121; found 184.1120.

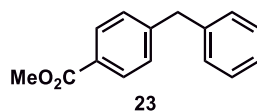

On 0.2 mmol scale, **General Procedure A** was followed with 4-(methoxycarbonyl) benzyl alcohol, bromobenzene, and triphenylphosphine (7.0 equiv). Purification by column chromatography (silica gel, 0:100 to 1:19 EtOAc:Petroleum Ether) afforded crude **23**. Further purification by preparative TLC (silica gel, 1:49, EtOAc:Petroleum ether) afforded **23** (38.9 mg, 86%).

**Physical state:** colorless oil;

**TLC:**  $R_f = 0.74$  (silica gel, 1:24, EtOAc:Petroleum Ether, UV);

$^1\text{H}$  NMR (400 MHz,  $\text{CDCl}_3$ ):  $\delta$  7.98–7.94 (m, 2H), 7.32–7.26 (m, 3H), 7.25–7.21 (m, 2H), 7.21–7.14 (m, 2H), 4.03 (s, 2H), 3.90 (s, 3H) ppm;

$^{13}\text{C}$  NMR (101 MHz,  $\text{CDCl}_3$ ):  $\delta$  167.2, 146.7, 140.3, 130.0, 129.1, 128.7, 128.2, 126.5, 52.1, 42.0 ppm;

HRMS (ESI): Calcd for  $\text{C}_{15}\text{H}_{15}\text{O}_2$   $[\text{M}+\text{H}]^+$ : 227.1067; found 227.1065.

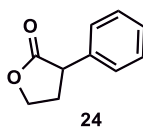

On 0.2 mmol scale, **General Procedure A** was followed with 3-hydroxyoxolan-2-one, bromobenzene, and triphenylphosphine (7.0 equiv). Purification by column chromatography (silica gel,  $\text{CH}_2\text{Cl}_2$ ) afforded **24** (30.8 mg, 95%).

**Physical state:** yellow oil;

**TLC:**  $R_f = 0.19$  (silica gel, 1:4, EtOAc:Petroleum Ether, UV);

**<sup>1</sup>H NMR** (400 MHz, CDCl<sub>3</sub>): δ 7.41–7.35 (m, 2H), 7.34–7.27 (m, 3H), 4.52–4.45 (m, 1H), 4.36 (dt, *J* = 9.2, 6.7 Hz, 1H), 3.82 (dd, *J* = 10.2, 8.9 Hz, 1H), 2.77–2.68 (m, 1H), 2.51–2.40 (m, 1H) ppm;  
**<sup>13</sup>C NMR** (101 MHz, CDCl<sub>3</sub>): δ 177.5, 136.8, 129.1, 128.0, 127.8, 66.6, 45.6, 31.7 ppm;  
**HRMS** (ESI): Calcd for C<sub>10</sub>H<sub>11</sub>O<sub>2</sub> [M+H]<sup>+</sup>: 163.0754; found 163.0754.

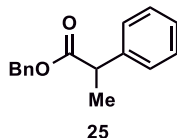

On 0.2 mmol scale, **General Procedure A** was followed with benzyl lactate, bromobenzene, and triphenylphosphine (3.0 equiv). Purification by column chromatography (silica gel, 1:20 EtOAc: Petroleum Ether) afforded crude **25**. Further purification by preparative TLC (silica gel, 1:20, EtOAc:Petroleum ether) afforded **25** (37.9 mg, 79%).

**Physical state:** colorless oil;

**TLC:** *R<sub>f</sub>* = 0.49 (silica gel, 1:30, EtOAc:Petroleum Ether, UV);

**<sup>1</sup>H NMR** (400 MHz, CDCl<sub>3</sub>): δ 7.35–7.22 (m, 10H), 5.11 (q, *J* = 12.5 Hz, 2H), 3.78 (q, *J* = 7.2 Hz, 1H), 1.52 (d, *J* = 7.2 Hz, 3H) ppm;

**<sup>13</sup>C NMR** (101 MHz, CDCl<sub>3</sub>): δ 174.4, 140.5, 136.1, 128.7, 128.6, 128.2, 128.0, 127.6, 127.3, 66.5, 45.6, 18.6 ppm;

**HRMS** (ESI): Calcd for C<sub>16</sub>H<sub>17</sub>O<sub>2</sub> [M+H]<sup>+</sup>: 241.1223; found 241.1223.

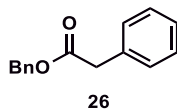

On 0.2 mmol scale, **General Procedure A** was followed with benzyl glycolate, bromobenzene, and triphenylphosphine (7.0 equiv). Purification by column chromatography (silica gel, 1:19 EtOAc: Petroleum Ether) afforded crude **26**. Further purification by preparative TLC (silica gel, 1:19, EtOAc:Petroleum ether) afforded **26** (38.5 mg, 85%).

**Physical state:** colorless oil;

**TLC:** *R<sub>f</sub>* = 0.40 (silica gel, 1:19, EtOAc:Petroleum Ether, UV);

**<sup>1</sup>H NMR** (400 MHz, CDCl<sub>3</sub>): δ 7.40–7.26 (m, 10H), 5.15 (s, 2H), 3.69 (s, 2H) ppm;

**<sup>13</sup>C NMR** (101 MHz, CDCl<sub>3</sub>): δ 171.5, 136.0, 134.0, 129.4, 128.7, 128.7, 128.3, 128.3, 127.3, 66.7, 41.5 ppm;

**HRMS** (ESI): Calcd for C<sub>15</sub>H<sub>15</sub>O<sub>2</sub> [M+H]<sup>+</sup>: 227.1067; found 227.1067.

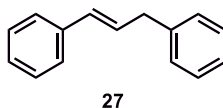

On 0.2 mmol scale, **General Procedure A** was followed with cinnamyl alcohol, bromobenzene, and triphenylphosphine (7.0 equiv). Purification by column chromatography (silica gel, hexane) afforded crude **27**. Further purification by preparative TLC (silica gel, hexane) afforded **27** (27.6 mg, 71%).

**Physical state:** colorless oil;

**TLC:** *R<sub>f</sub>* = 0.40 (silica gel, *n*-hexane, UV);

**<sup>1</sup>H NMR** (400 MHz, CDCl<sub>3</sub>): δ 7.42–7.21 (m, 10H), 6.52–6.46 (m, 1H), 6.43–6.34 (m, 1H), 3.58 (dd, *J* = 6.6, 1.2 Hz, 2H) ppm;

**<sup>13</sup>C NMR** (101 MHz, CDCl<sub>3</sub>): δ 140.3, 137.6, 131.2, 129.4, 128.8, 128.6, 127.2, 126.3, 126.3, 39.5 ppm;

**HRMS** (ESI): Calcd for C<sub>15</sub>H<sub>15</sub> [M+H]<sup>+</sup>: 195.1168; found 195.1168.

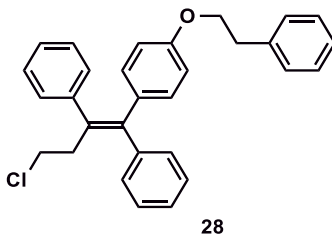

On 0.2 mmol scale, **General Procedure A** was followed with ospemifene, bromobenzene, and triphenylphosphine (7.0 equiv). Purification by column chromatography (silica gel, CH<sub>2</sub>Cl<sub>2</sub>) afforded crude **28**. Further purification by preparative TLC (silica gel, 1:19, EtOAc:Petroleum ether) afforded **28** (50.0 mg, 57%).

**Physical state:** white amorphous solid;

**TLC:** R<sub>f</sub> = 0.45 (silica gel, 1:19, EtOAc:Petroleum Ether, UV);

**<sup>1</sup>H NMR** (400 MHz, CDCl<sub>3</sub>): δ 7.41–7.35 (m, 2H), 7.32–7.27 (m, 5H), 7.25–7.18 (m, 5H), 7.17–7.11 (m, 3H), 6.84–6.72 (m, 2H), 6.64–6.51 (m, 2H), 4.04 (t, *J* = 7.1 Hz, 2H), 3.42 (t, *J* = 7.5 Hz, 2H), 3.02 (t, *J* = 7.1 Hz, 2H), 2.93 (t, *J* = 7.5 Hz, 2H) ppm;

**<sup>13</sup>C NMR** (101 MHz, CDCl<sub>3</sub>): δ 157.1, 143.0, 141.9, 141.1, 138.3, 135.3, 134.9, 131.8, 129.7, 129.5, 129.1, 128.6, 128.5, 128.4, 127.1, 126.7, 126.7, 113.6, 68.5, 43.0, 38.7, 35.9 ppm;

**HRMS** (ESI): Calcd for C<sub>30</sub>H<sub>28</sub>ClO [M+H]<sup>+</sup>: 439.1823; found 439.1820.

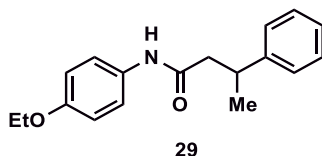

On 0.2 mmol scale, **General Procedure A** was followed with buctin, bromobenzene, and triphenylphosphine (3.0 equiv). Purification by column chromatography (silica gel, 0:100 to 1:4, EtOAc:Petroleum Ether) afforded crude **29**. Further purification by preparative TLC (silica gel, 3:7, EtOAc:Petroleum ether) afforded **29** (41.9 mg, 74%).

**Physical state:** white amorphous solid;

**TLC:** R<sub>f</sub> = 0.55 (silica gel, 2:3, EtOAc:Petroleum Ether, UV);

**<sup>1</sup>H NMR** (400 MHz, CDCl<sub>3</sub>): δ 7.36–7.28 (m, 2H), 7.28–7.17 (m, 5H), 6.87 (*br*, s, 1H), 6.81–6.76 (m, 2H), 3.97 (q, *J* = 7.0 Hz, 2H), 3.41–3.31 (m, 1H), 2.64–2.51 (m, 2H), 1.38 (t, *J* = 6.8 Hz, 3H), 1.37 (d, *J* = 6.8 Hz, 3H) ppm;

**<sup>13</sup>C NMR** (101 MHz, CDCl<sub>3</sub>): δ 169.9, 155.9, 145.9, 130.7, 128.9, 127.0, 126.7, 122.1, 114.8, 63.8, 46.8, 37.3, 21.8, 15.0 ppm;

**HRMS** (ESI): Calcd for C<sub>18</sub>H<sub>22</sub>NO<sub>2</sub> [M+H]<sup>+</sup>: 284.1645; found 284.1645.

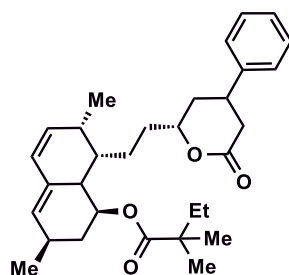

30

On 0.2 mmol scale, without treatment by hydrogen peroxide, **General Procedure A** was followed with simvastatin, bromobenzene, and triphenylphosphine (7.0 equiv). Purification by column chromatography (silica gel, 1:4 EtOAc:Petroleum Ether) afforded **30** as two inseparable diastereomers (d.r. = 1.5:1, 70.8 mg, 74%).

**Physical state:** white amorphous solid;

**TLC:**  $R_f$  = 0.37 (silica gel, 1:4, EtOAc:Petroleum Ether, UV);

**$^1\text{H}$  NMR** (400 MHz,  $\text{CDCl}_3$ ):  $\delta$  7.38–7.32 (m, 2H), 7.31–7.23 (m, 1H), 7.22–7.17 (m, 2H), 5.99 (dd,  $J$  = 9.7, 3.3 Hz, 1H), 5.81–5.74 (m, 1H), 5.52–5.48 (m, 1H), 5.37–5.31 (m, 1H), 4.38–4.27 (m, 1H), 3.41–3.27 (m, 1H), 3.23–3.12 (m, 0.5H), 2.92 (ddd,  $J$  = 17.7, 6.0, 1.9 Hz, 0.5H), 2.85–2.66 (m, 2H), 2.53 (dd,  $J$  = 17.8, 11.3 Hz, 1H), 2.46–2.39 (m, 1H), 2.39–2.32 (m, 1H), 2.30–2.20 (m, 1H), 2.20–2.12 (m, 1H), 2.09–1.99 (m, 2H), 1.98–1.91 (m, 2H), 1.93–1.82 (m, 1H), 1.73–1.62 (m, 1H), 1.58–1.30 (m, 2H), 1.08 (dt,  $J$  = 7.4, 5.0 Hz, 9H), 0.89 (t,  $J$  = 7.6 Hz, 3H), 0.78 (dt,  $J$  = 16.5, 7.5 Hz, 3H) ppm;

**$^{13}\text{C}$  NMR** (101 MHz,  $\text{CDCl}_3$ ):  $\delta$  177.8, 177.8, 171.8, 170.8, 143.3, 143.1, 133.0, 133.0, 131.7, 131.7, 129.9, 129.1, 129.1, 128.6, 127.3, 127.2, 126.7, 126.5, 81.2, 78.3, 68.1, 68.1, 43.1, 37.7, 37.7, 37.7, 36.9, 36.7, 36.3, 35.5, 34.9, 33.9, 33.2, 33.2, 33.1, 33.0, 33.0, 30.8, 27.4, 24.9, 24.8, 24.8, 24.8, 24.6, 23.2, 14.1, 9.4, 9.4 ppm;

**HRMS** (ESI): Calcd for  $\text{C}_{31}\text{H}_{43}\text{O}_4$   $[\text{M}+\text{H}]^+$ : 479.3156; found 479.3160.

The purity of **30** was further determined by UPLC-MS.

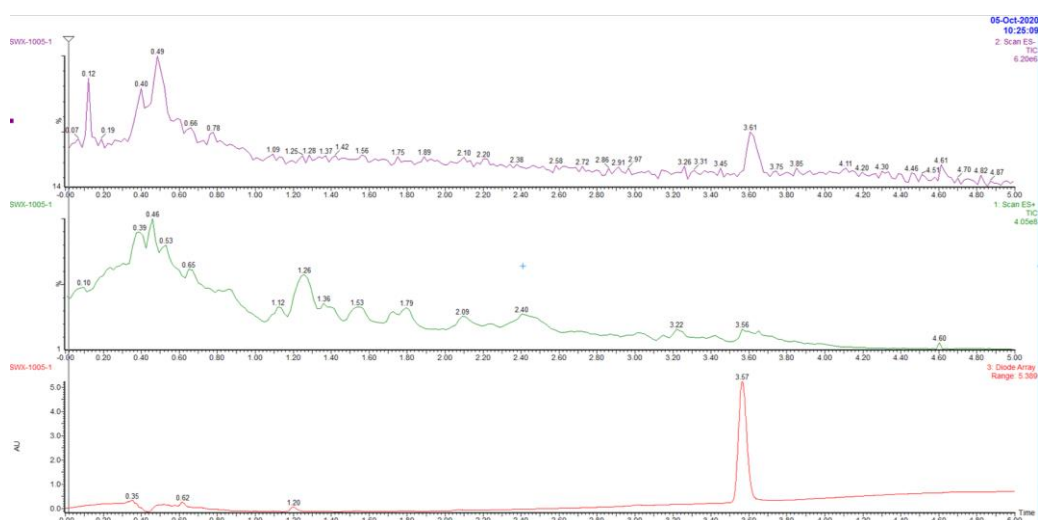

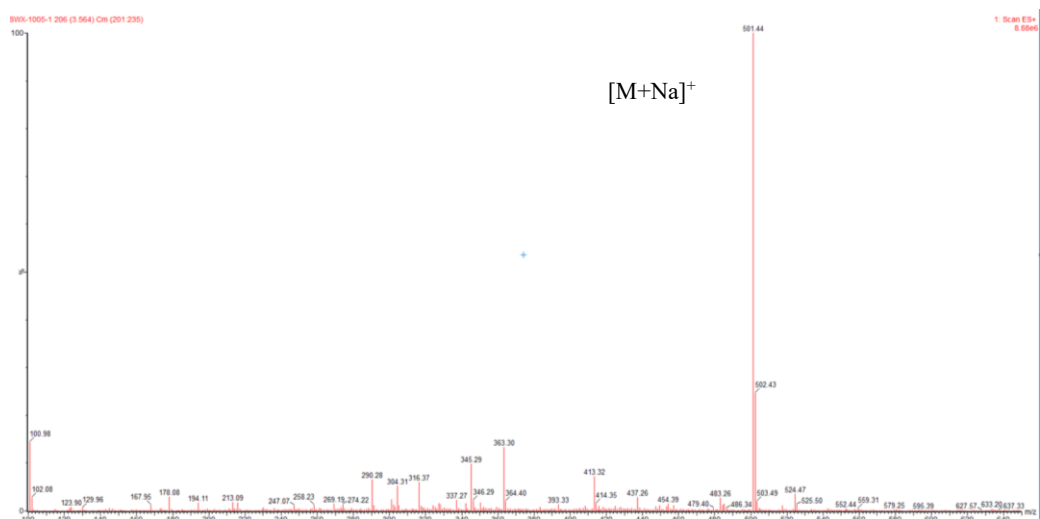

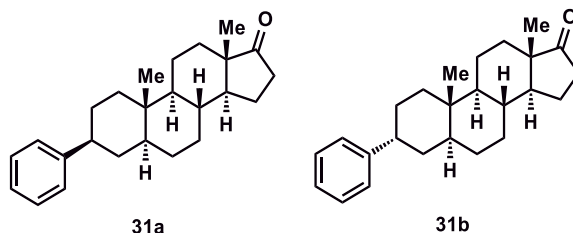

On 0.2 mmol scale, **General Procedure A** was followed with epiandrosterone, bromobenzene, and triphenylphosphine (3.0 equiv). Purification by column chromatography (silica gel, CH<sub>2</sub>Cl<sub>2</sub>) afforded crude **31**. Further purification by preparative TLC (silica gel, 1:9, EtOAc:Petroleum ether) afforded **31a** and **31b** (d.r. = 1:1, 34.4 mg, 49%).

For characterization, these two diastereomers were further separated by preparative HPLC (100% CH<sub>3</sub>CN).

**31a:**

**Physical state:** white solid;

**Melting point:** 167.5–167.9 °C;

**TLC:** R<sub>f</sub> = 0.23 (silica gel, 1:19, EtOAc:Petroleum Ether, UV);

**<sup>1</sup>H NMR** (400 MHz, CDCl<sub>3</sub>): δ 7.32–7.27 (m, 2H), 7.24–7.15 (m, 3H), 2.61–2.51 (m, 1H), 2.45 (ddd, *J* = 19.1, 8.9, 1.0 Hz, 1H), 2.08 (dt, *J* = 19.1, 9.0 Hz, 1H), 1.99–1.90 (m, 1H), 1.86–1.78 (m, 3H), 1.78–1.67 (m, 2H), 1.67–1.60 (m, 1H), 1.59–1.56 (m, 1H), 1.55–1.45 (m, 3H), 1.38–1.25 (m, 6H), 1.11 (dt, *J* = 13.0, 4.3 Hz, 1H), 1.08–0.99 (m, 1H), 0.91 (s, 3H), 0.88 (s, 3H), 0.84–0.74 (m, 1H) ppm;

**<sup>13</sup>C NMR** (101 MHz, CDCl<sub>3</sub>): δ 221.7, 147.6, 128.4, 126.9, 126.0, 54.9, 51.7, 48.0, 47.2, 44.9, 39.0, 36.7, 36.1, 36.0, 35.3, 31.8, 31.1, 29.9, 28.7, 21.9, 20.5, 14.0, 12.6 ppm;

**HRMS** (ESI): Calcd for C<sub>25</sub>H<sub>35</sub>O [M+H]<sup>+</sup>: 351.2682; found 351.2675.

**31b:**

**Physical state:** white amorphous solid;

**TLC:** R<sub>f</sub> = 0.23 (silica gel, 1:19, EtOAc:Petroleum Ether, UV);

**<sup>1</sup>H NMR** (400 MHz, CDCl<sub>3</sub>): δ 7.40–7.34 (m, 2H), 7.34–7.29 (m, 2H), 7.20–7.15 (m, 1H), 3.09 (t, *J* = 6.0 Hz, 1H), 2.41 (ddd, *J* = 19.1, 8.9, 1.1 Hz, 1H), 2.14–2.07 (m, 1H), 2.06–1.94 (m, 2H), 1.94–1.81 (m, 2H), 1.80–1.70 (m, 3H), 1.67–1.51 (m, 3H), 1.50–1.40 (m, 1H), 1.35–1.13 (m, 7H), 0.97–0.83 (m, 1H), 0.91 (d, *J* = 0.6 Hz, 3H), 0.85 (d, *J* = 0.5 Hz, 3H), 0.70–0.62 (m, 1H) ppm;

**<sup>13</sup>C NMR** (101 MHz, CDCl<sub>3</sub>): δ 221.7, 145.5, 128.2, 127.7, 125.3, 54.8, 51.6, 48.0, 40.9, 36.5, 36.0, 35.1, 34.5, 33.3, 31.7, 30.8, 28.7, 25.1, 21.9, 20.1, 14.0, 12.2 ppm;

**HRMS** (ESI): Calcd for C<sub>25</sub>H<sub>35</sub>O [M+H]<sup>+</sup>: 351.2682; found 351.2678.

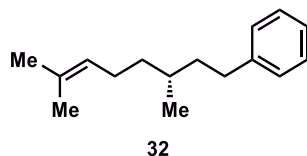

On 0.2 mmol scale, **General Procedure A** was followed with citronellol, bromo-benzene, and triphenylphosphine (7.0 equiv). Purification by column chromatography (silica gel, pentane) afforded crude **32**. Further purification by preparative TLC (silica gel, Petroleum ether) afforded **32** (25.5 mg, 59%).

**Physical state:** colorless oil;

**TLC:**  $R_f$  = 0.62 (silica gel, Petroleum ether, UV);

**$^1\text{H}$  NMR** (400 MHz,  $\text{CDCl}_3$ ):  $\delta$  7.30–7.25 (m, 2H), 7.20–7.12 (m, 3H), 5.13–5.07 (m, 1H), 2.70–2.51 (m, 2H), 2.07–1.89 (m, 2H), 1.68 (d,  $J$  = 1.3 Hz, 3H), 1.67–1.62 (m, 1H), 1.60 (d,  $J$  = 1.2 Hz, 3H), 1.52–1.33 (m, 3H), 1.25–1.14 (m, 1H), 0.94 (d,  $J$  = 6.3 Hz, 3H) ppm;

**$^{13}\text{C}$  NMR** (101 MHz,  $\text{CDCl}_3$ ):  $\delta$  143.3, 131.3, 128.5, 128.4, 125.7, 125.1, 39.1, 37.1, 33.6, 32.3, 25.9, 25.6, 19.7, 17.8 ppm;

**HRMS** (ESI): Calcd for  $\text{C}_{16}\text{H}_{25}$   $[\text{M}+\text{H}]^+$ : 217.1951; found 217.1956.

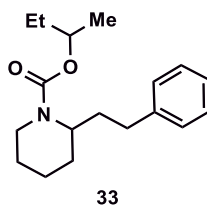

On 0.2 mmol scale, without treatment by hydrogen peroxide, **General Procedure A** was followed with icaridin, bromobenzene, and triphenylphosphine (7.0 equiv). Purification by column chromatography (silica gel, 1:19 EtOAc:Petroleum Ether) afforded crude **33**. Further purification by preparative TLC (silica gel, 1:9, EtOAc:Petroleum ether) afforded **33** (48.6 mg, 84%).

*Note: The starting material icaridin was used as a mixture of diastereomers.*

**Physical state:** yellow oil;

**TLC:**  $R_f$  = 0.50 (silica gel, 1:9, EtOAc:Petroleum Ether, UV);

**$^1\text{H}$  NMR** (400 MHz,  $\text{CDCl}_3$ ):  $\delta$  7.34–7.25 (m, 2H), 7.22–7.16 (m, 3H), 4.82–4.72 (m, 1H), 4.35 (br, s, 1H), 4.06 (d,  $J$  = 13.5 Hz, 1H), 2.84 (dt,  $J$  = 13.2, 2.4 Hz, 1H), 2.66–2.48 (m, 2H), 2.09–1.96 (m, 1H), 1.78–1.68 (m, 1H), 1.68–1.48 (m, 7H), 1.47–1.37 (m, 1H), 1.21 (dd,  $J$  = 6.2, 0.7 Hz, 3H), 0.91 (dt,  $J$  = 7.4, 5.0 Hz, 3H) ppm;

**$^{13}\text{C}$  NMR** (400 MHz,  $\text{CDCl}_3$ ):  $\delta$  155.9, 142.3, 128.5, 128.5, 125.9, 73.0, 72.9, 50.6, 50.5, 39.1, 39.0, 33.0, 32.9, 32.0, 29.3, 29.3, 28.6, 25.7, 20.0, 20.0, 19.2, 9.9, 9.9 ppm;

**HRMS** (ESI): Calcd for  $\text{C}_{18}\text{H}_{28}\text{NO}_2$   $[\text{M}+\text{H}]^+$ : 290.2115; found 290.2115.

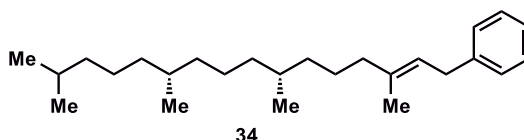

On 0.2 mmol scale, **General Procedure A** was followed with phytol, bromobenzene, and triphenylphosphine (3.0 equiv). Purification by column chromatography (silica gel,  $\text{CH}_2\text{Cl}_2$ ) afforded **34** (53.5 mg, 75%).

**Physical state:** colorless oil;

**TLC:**  $R_f$  = 0.71 (silica gel, Petroleum Ether, UV);

**$^1\text{H}$  NMR** (400 MHz,  $\text{CDCl}_3$ ):  $\delta$  7.34–7.27 (m, 2H), 7.23–7.17 (m, 3H), 5.39–5.32 (m, 1H), 3.39 (d,  $J$  = 7.3 Hz, 2H), 2.09–1.97 (m, 2H), 1.73 (t,  $J$  = 1.5 Hz, 3H), 1.60–1.50 (m, 1H), 1.50–1.37 (m, 4H), 1.36–1.24 (m, 8H), 1.19–1.14 (m, 2H), 1.11–1.03 (m, 4H), 0.89 (d,  $J$  = 6.8 Hz, 6H), 0.88 (d,  $J$  = 1.9 Hz, 3H), 0.87 (d,  $J$  = 1.9 Hz, 3H) ppm;

**$^{13}\text{C}$  NMR** (101 MHz,  $\text{CDCl}_3$ ):  $\delta$  142.0, 136.8, 128.5, 125.8, 122.9, 40.2, 39.5, 37.6, 37.6, 37.5, 36.8, 34.4, 33.0, 32.8, 28.1, 25.5, 25.0, 24.6, 22.9, 22.8, 19.9, 16.2 ppm;

**HRMS** (ESI): Calcd for C<sub>26</sub>H<sub>45</sub> [M+H]<sup>+</sup>: 357.3516; found 357.3527.

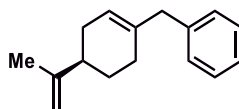

**35**

On 0.2 mmol scale, **General Procedure A** was followed with perillol, bromobenzene, and triphenylphosphine (3.0 equiv). Purification by column chromatography (silica gel, CH<sub>2</sub>Cl<sub>2</sub>) afforded crude **35**. Further purification by preparative TLC (silica gel, Petroleum ether) afforded **35** (23.4 mg, 55%).

**Physical state:** colorless oil;

**TLC:** R<sub>f</sub> = 0.67 (silica gel, Petroleum Ether, UV);

**<sup>1</sup>H NMR** (400 MHz, CDCl<sub>3</sub>): δ 7.34–7.25 (m, 2H), 7.23–7.14 (m, 3H), 5.53–5.45 (m, 1H), 4.75–4.67 (m, 2H), 3.27 (s, 2H), 2.20–2.07 (m, 2H), 2.03–1.92 (m, 3H), 1.82–1.76 (m, 1H), 1.73 (t, *J* = 1.2 Hz, 3H), 1.51–1.40 (m, 1H) ppm;

**<sup>13</sup>C NMR** (101 MHz, CDCl<sub>3</sub>): δ 150.3, 140.5, 137.1, 129.0, 128.3, 126.0, 122.6, 108.6, 44.4, 41.3, 31.0, 28.7, 28.0, 20.9 ppm;

**HRMS** (ESI): Calcd for C<sub>16</sub>H<sub>21</sub> [M+H]<sup>+</sup>: 213.1638; found 213.1638.

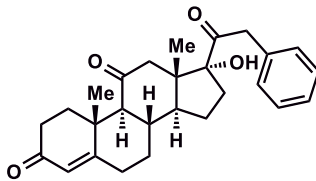

**36**

On 0.2 mmol scale, **General Procedure A** was followed with cortisone, bromobenzene, and triphenylphosphine (7.0 equiv). Purification by column chromatography (silica gel, 1:2, EtOAc:Petroleum ether) afforded crude **36**. Further purification by preparative TLC (silica gel, 1:1, EtOAc:Petroleum ether) afforded **36** (51.3 mg, 61%).

**Physical state:** white solid;

**Melting point:** 210.4–213.5 °C;

**TLC:** R<sub>f</sub> = 0.39 (silica gel, 1:1, EtOAc:Petroleum Ether, UV);

**<sup>1</sup>H NMR** (400 MHz, CDCl<sub>3</sub>): δ 7.35–7.29 (m, 2H), 7.28–7.22 (m, 1H), 7.19–7.13 (m, 2H), 5.72 (s, 1H), 4.02 (d, *J* = 16.0 Hz, 1H), 3.72 (d, *J* = 16.0 Hz, 1H), 2.91–2.72 (m, 3H), 2.52–2.35 (m, 3H), 2.33–2.25 (m, 2H), 2.12 (d, *J* = 12.4 Hz, 1H), 2.02–1.89 (m, 4H), 1.73–1.58 (m, 2H), 1.52–1.42 (m, 1H), 1.41 (s, 3H), 1.35–1.22 (m, 1H), 0.75 (s, 3H) ppm;

**<sup>13</sup>C NMR** (101 MHz, CDCl<sub>3</sub>): δ 209.7, 209.6, 200.0, 168.9, 133.8, 129.7, 128.7, 127.2, 124.7, 89.4, 62.7, 51.7, 50.4, 49.7, 46.3, 38.3, 36.6, 34.8, 34.5, 33.8, 32.4, 32.4, 23.6, 17.3, 16.4 ppm;

**HRMS** (ESI): Calcd for C<sub>27</sub>H<sub>33</sub>O<sub>4</sub> [M+H]<sup>+</sup>: 421.2373; found 421.2374.

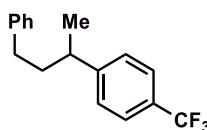

**37**

On 0.2 mmol scale, **General Procedure A** was followed with 4-phenylbutan-2-ol, 1-bromo-4-

trifluoromethylbenzene, and triphenylphosphine (10.0 equiv). Purification by column chromatography (silica gel, Petroleum Ether) afforded crude **37**. Further purification by preparative TLC (silica gel, pentane) afforded **37** (33.4 mg, 60%).

**Physical state:** colorless oil;

**TLC:**  $R_f$  = 0.80 (silica gel, Petroleum Ether, UV);

**$^1\text{H}$  NMR** (400 MHz,  $\text{CDCl}_3$ ):  $\delta$  7.59–7.54 (m, 2H), 7.34–7.29 (m, 2H), 7.28–7.24 (m, 2H), 7.21–7.15 (m, 1H), 7.14–7.09 (m, 2H), 2.85–2.74 (m, 1H), 2.58–2.45 (m, 2H), 1.97–1.90 (m, 2H), 1.29 (d,  $J$  = 6.9 Hz, 3H) ppm;

**$^{13}\text{C}$  NMR** (101 MHz,  $\text{CDCl}_3$ ):  $\delta$  151.5, 142.2, 128.5, 128.5, 127.6, 126.0, 125.5 (q,  $J$  = 4.0 Hz), 124.5 (q,  $J$  = 273 Hz), 39.8, 39.5, 33.9, 22.4 ppm;

**$^{19}\text{F}$  NMR** (376 MHz,  $\text{CDCl}_3$ ):  $\delta$  62.28 ppm;

**HRMS** (APCI): Calcd for  $\text{C}_{17}\text{H}_{21}\text{F}_3\text{N}$   $[\text{M}+\text{NH}_4]^+$ : 296.1621; found 296.1635.

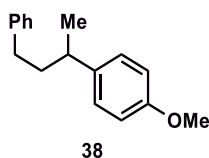

On 0.2 mmol scale, **General Procedure A** was followed with 4-phenylbutan-2-ol, 1-bromo-4-methoxy-benzene, and triphenylphosphine (3.0 equiv). Purification by column chromatography (silica gel, Petroleum Ether) afforded crude **38**. Further purification by preparative TLC (silica gel, Petroleum ether) afforded **38** (29.2 mg, 61%).

**Physical state:** colorless oil;

**TLC:**  $R_f$  = 0.39 (silica gel, Petroleum Ether, UV);

**$^1\text{H}$  NMR** (400 MHz,  $\text{CDCl}_3$ ):  $\delta$  7.32–7.25 (m, 2H), 7.22–7.18 (m, 1H), 7.18–7.10 (m, 4H), 6.93–6.83 (m, 2H), 3.82 (s, 3H), 2.76–2.64 (m, 1H), 2.58–2.47 (m, 2H), 1.97–1.84 (m, 2H), 1.27 (d,  $J$  = 6.9 Hz, 3H) ppm;

**$^{13}\text{C}$  NMR** (101 MHz,  $\text{CDCl}_3$ ):  $\delta$  157.9, 142.7, 139.5, 128.5, 128.4, 128.0, 125.7, 113.9, 55.4, 40.3, 38.8, 34.1, 22.9 ppm;

**HRMS** (ESI): Calcd for  $\text{C}_{17}\text{H}_{21}\text{O}$   $[\text{M}+\text{H}]^+$ : 241.1587; found 241.1586.

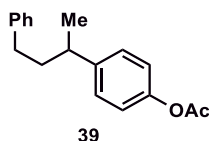

On 0.2 mmol scale, **General Procedure A** was followed with 4-phenylbutan-2-ol, 4-bromophenyl acetate, and triphenylphosphine (3.0 equiv). Purification by column chromatography (silica gel,  $\text{CH}_2\text{Cl}_2$ ) afforded crude **39**. Further purification by preparative TLC (silica gel, 1:9, EtOAc: Petroleum ether) afforded **39** (22.0 mg, 41%).

**Physical state:** colorless oil;

**TLC:**  $R_f$  = 0.37 (silica gel, 1:19, EtOAc:Petroleum Ether, UV);

**$^1\text{H}$  NMR** (400 MHz,  $\text{CDCl}_3$ ):  $\delta$  7.29–7.24 (m, 2H), 7.22–7.16 (m, 3H), 7.16–7.11 (m, 2H), 7.05–7.01 (m, 2H), 2.78–2.68 (m, 1H), 2.58–2.46 (m, 2H), 2.30 (s, 3H), 1.97–1.85 (m, 2H), 1.27 (d,  $J$  = 6.9 Hz, 3H) ppm;

**$^{13}\text{C}$  NMR** (101 MHz,  $\text{CDCl}_3$ ):  $\delta$  169.8, 148.9, 144.9, 142.5, 128.5, 128.4, 128.1, 125.8, 121.5, 40.1,

39.1, 34.0, 22.6, 21.3 ppm;

**HRMS** (ESI): Calcd for  $C_{18}H_{21}O_2$   $[M+H]^+$ : 269.1536; found 269.1535.

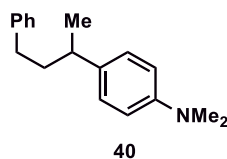

On 0.2 mmol scale, without treatment by hydrogen peroxide, **General Procedure A** was followed with 4-phenylbutan-2-ol, 4-bromo-*N,N*-dimethylaniline, and triphenylphosphine (7.0 equiv). Purification by column chromatography (silica gel, hexane) afforded crude **40**. Further purification by preparative TLC (silica gel, 1:9, EtOAc: Petroleum ether) afforded **40** (31.0 mg, 62%).

**Physical state:** yellow oil;

**TLC:**  $R_f$  = 0.42 (silica gel, 1:19, EtOAc:Petroleum Ether, UV);

**$^1H$  NMR** (400 MHz,  $CDCl_3$ ):  $\delta$  7.30–7.23 (m, 2H), 7.20–7.07 (m, 5H), 6.77 (*br*, s, 2H), 2.94 (s, 6H), 2.70–2.60 (m, 1H), 2.52 (t,  $J$  = 8.0 Hz, 2H), 1.95–1.81 (m, 2H), 1.24 (d,  $J$  = 6.9 Hz, 3H) ppm;

**$^{13}C$  NMR** (101 MHz,  $CDCl_3$ ):  $\delta$  148.7, 142.9, 128.5, 128.3, 127.8, 125.7, 113.5, 41.3, 40.3, 38.6, 34.1, 22.9 ppm;

**HRMS** (ESI): Calcd for  $C_{18}H_{24}N$   $[M+H]^+$ : 254.1903; found 254.1903.

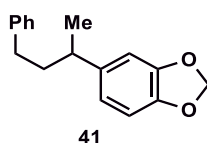

On 0.2 mmol scale, without treatment by hydrogen peroxide, **General Procedure A** was followed with 4-phenylbutan-2-ol, 1,2-(methylenedioxy)-4-bromobenzene, and triphenylphosphine (3.0 equiv). Purification by column chromatography (silica gel, 1:19 EtOAc:Petroleum Ether) afforded crude **41**. Further purification by preparative TLC (silica gel, 100:1:1, Petroleum ether: EtOAc:  $CH_2Cl_2$ ) afforded **41** (32.0 mg, 63%).

**Physical state:** yellow oil;

**TLC:**  $R_f$  = 0.60 (silica gel, 1:19, EtOAc:Petroleum Ether, UV);

**$^1H$  NMR** (400 MHz,  $CDCl_3$ ):  $\delta$  7.32–7.24 (m, 2H), 7.21–7.13 (m, 3H), 6.78 (d,  $J$  = 8.0 Hz, 1H), 6.74 (d,  $J$  = 1.7 Hz, 1H), 6.69–6.65 (m, 1H), 5.95 (s, 2H), 2.72–2.62 (m, 1H), 2.57–2.48 (m, 2H), 1.93–1.84 (m, 2H), 1.25 (d,  $J$  = 6.9 Hz, 3H) ppm;

**$^{13}C$  NMR** (101 MHz,  $CDCl_3$ ):  $\delta$  147.8, 145.7, 142.6, 141.4, 128.5, 128.4, 125.8, 120.1, 108.2, 107.4, 100.9, 40.3, 39.4, 34.0, 22.9 ppm;

**HRMS** (APCI): Calcd for  $C_{17}H_{19}O_2$   $[M+H]^+$ : 255.1380; found 255.1388.

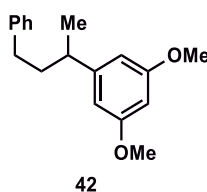

On 0.2 mmol scale, **General Procedure A** was followed with 4-phenylbutan-2-ol, 1-bromo-3,5-dimethoxybenzene, and triphenylphosphine (7.0 equiv). Purification by column chromatography

(silica gel, 1:19 EtOAc:Petroleum Ether) afforded crude **42**. Further purification by preparative TLC (silica gel, 1:19, EtOAc:Petroleum ether) afforded **42** (31.0 mg, 57%).

**Physical state:** colorless oil;

**TLC:**  $R_f$  = 0.55 (silica gel, 1:24, EtOAc:Petroleum Ether, UV);

**$^1\text{H}$  NMR** (400 MHz,  $\text{CDCl}_3$ ):  $\delta$  7.31–7.23 (m, 2H), 7.20–7.12 (m, 3H), 6.38 (d,  $J$  = 2.3 Hz, 2H), 6.33 (t,  $J$  = 2.3 Hz, 1H), 3.80 (s, 6H), 2.71–2.61 (m, 1H), 2.53 (t,  $J$  = 8.0 Hz, 2H), 1.98–1.81 (m, 2H), 1.26 (d,  $J$  = 6.9 Hz, 3H) ppm;

**$^{13}\text{C}$  NMR** (101 MHz,  $\text{CDCl}_3$ ):  $\delta$  160.9, 150.1, 142.7, 128.5, 128.4, 125.8, 105.4, 97.7, 55.4, 40.0, 39.9, 34.1, 22.6 ppm;

**HRMS** (ESI): Calcd for  $\text{C}_{18}\text{H}_{23}\text{O}_2$   $[\text{M}+\text{H}]^+$ : 271.1693; found 271.1693.

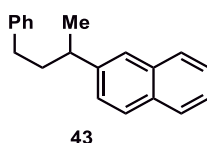

On 0.2 mmol scale, **General Procedure A** was followed with 4-phenylbutan-2-ol, 2-bromonaphthalene, and triphenylphosphine (10.0 equiv). Purification by column chromatography (silica gel,  $\text{CH}_2\text{Cl}_2$ ) afforded crude **43**. Further purification by preparative TLC (silica gel, pentane) afforded **43** (23.5 mg, 45%).

**Physical state:** colorless oil;

**TLC:**  $R_f$  = 0.32 (silica gel, Petroleum Ether, UV);

**$^1\text{H}$  NMR** (400 MHz,  $\text{CDCl}_3$ ):  $\delta$  7.85–7.78 (m, 3H), 7.63 (d,  $J$  = 1.7 Hz, 1H), 7.49–7.40 (m, 2H), 7.38 (dd,  $J$  = 8.5, 1.8 Hz, 1H), 7.29–7.23 (m, 2H), 7.20–7.10 (m, 3H), 2.96–2.84 (m, 1H), 2.61–2.48 (m, 2H), 2.18–1.86 (m, 2H), 1.36 (d,  $J$  = 6.9 Hz, 3H) ppm;

**$^{13}\text{C}$  NMR** (101 MHz,  $\text{CDCl}_3$ ):  $\delta$  144.8, 142.7, 133.8, 132.4, 128.5, 128.4, 128.2, 127.8, 127.7, 126.0, 125.9, 125.8, 125.5, 125.3, 40.0, 39.8, 34.1, 22.7 ppm;

**HRMS** (ESI): Calcd for  $\text{C}_{20}\text{H}_{21}$   $[\text{M}+\text{H}]^+$ : 261.1638; found 261.1639.

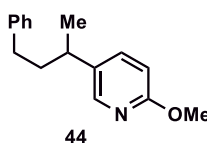

On 0.2 mmol scale, without treatment by hydrogen peroxide, **General Procedure A** was followed with 4-phenylbutan-2-ol, 2-methoxy-5-bromopyridine, and triphenylphosphine (10.0 equiv). Purification by column chromatography (silica gel, 100:3:3, Petroleum ether:EtOAc: $\text{CH}_2\text{Cl}_2$ ) afforded crude **44**. Further purification by preparative TLC (silica gel, 100:5:5, Petroleum ether:EtOAc: $\text{CH}_2\text{Cl}_2$ ) afforded **44** (31.4 mg, 65%).

**Physical state:** colorless oil;

**TLC:**  $R_f$  = 0.30 (silica gel, 3:97, EtOAc:Petroleum Ether, UV);

**$^1\text{H}$  NMR** (400 MHz,  $\text{CDCl}_3$ ):  $\delta$  7.99 (dd,  $J$  = 2.5, 0.6 Hz, 1H), 7.43 (dd,  $J$  = 8.5, 2.5 Hz, 1H), 7.29–7.23 (m, 2H), 7.20–7.14 (m, 1H), 7.14–7.09 (m, 2H), 6.72 (dd,  $J$  = 8.6, 0.6 Hz, 1H), 3.93 (s, 3H), 2.74–2.63 (m, 1H), 2.50 (t,  $J$  = 8.0 Hz, 2H), 1.96–1.80 (m, 2H), 1.25 (d,  $J$  = 6.9 Hz, 3H) ppm;

**$^{13}\text{C}$  NMR** (101 MHz,  $\text{CDCl}_3$ ):  $\delta$  162.9, 145.5, 142.2, 137.3, 135.0, 128.5, 125.9, 110.8, 53.4, 39.9, 36.2, 33.9, 22.6 ppm;

**HRMS** (ESI): Calcd for C<sub>16</sub>H<sub>20</sub>NO [M+H]<sup>+</sup>: 242.1539; found 242.1540.

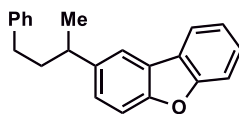

**45**

On 0.2 mmol scale, **General Procedure A** was followed with 4-phenylbutan-2-ol, 2-bromo-dibenzofuran, and triphenylphosphine (3.0 equiv). Purification by column chromatography (silica gel, Petroleum Ether) afforded crude **45**. Further purification by preparative TLC (silica gel, Petroleum ether) afforded **45** (24.0 mg, 40%).

**Physical state:** colorless oil;

**TLC:** R<sub>f</sub> = 0.30 (silica gel, Petroleum Ether, UV);

**<sup>1</sup>H NMR** (400 MHz, CDCl<sub>3</sub>): δ 8.00–7.92 (m, 1H), 7.79–7.75 (m, 1H), 7.55 (dt, *J* = 8.2, 0.8 Hz, 1H), 7.50 (dd, *J* = 8.4, 0.6 Hz, 1H), 7.46–7.41 (m, 1H), 7.36–7.22 (m, 4H), 7.19–7.11 (m, 3H), 2.95–2.83 (m, 1H), 2.62–2.47 (m, 2H), 2.08–1.93 (m, 2H), 1.36 (d, *J* = 7.0 Hz, 3H) ppm;

**<sup>13</sup>C NMR** (101 MHz, CDCl<sub>3</sub>): δ 156.6, 155.0, 142.6, 142.0, 128.5, 128.4, 127.1, 126.5, 125.8, 124.5, 124.4, 122.7, 120.7, 118.8, 111.8, 111.5, 40.6, 39.7, 34.1, 23.2 ppm;

**HRMS** (ESI): Calcd for C<sub>22</sub>H<sub>21</sub>O [M+H]<sup>+</sup>: 301.1587; found 301.1585.

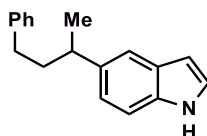

**46**

On 0.2 mmol scale, without treatment by hydrogen peroxide, **General Procedure A** was followed with 4-phenylbutan-2-ol, 5-bromo-1H-indole, and triphenylphosphine (3.0 equiv). Purification by column chromatography (silica gel, 1:9 EtOAc:Petroleum Ether) afforded crude **46**. Further purification by preparative TLC (silica gel, 1:9, EtOAc:toluene) afforded **46** (21.4 mg, 43%).

**Physical state:** colorless oil;

**TLC:** R<sub>f</sub> = 0.58 (silica gel, 1:4, EtOAc:Petroleum Ether, UV);

**<sup>1</sup>H NMR** (400 MHz, CDCl<sub>3</sub>): δ 8.08 (*br*, s, 1H), 7.52–7.45 (m, 1H), 7.35 (d, *J* = 8.3 Hz, 1H), 7.29–7.23 (m, 2H), 7.22–7.12 (m, 4H), 7.08 (dd, *J* = 8.4, 1.7 Hz, 1H), 6.54–6.51 (m, 1H), 2.88–2.77 (m, 1H), 2.60–2.48 (m, 2H), 2.06–1.88 (m, 2H), 1.33 (d, *J* = 6.9 Hz, 3H) ppm;

**<sup>13</sup>C NMR** (101 MHz, CDCl<sub>3</sub>): δ 143.1, 138.9, 134.6, 128.6, 128.4, 128.1, 125.7, 124.4, 121.7, 118.7, 111.0, 102.5, 40.7, 39.8, 34.2, 23.4 ppm;

**HRMS** (ESI): Calcd for C<sub>18</sub>H<sub>20</sub>N [M+H]<sup>+</sup>: 250.1590; found 250.1592.

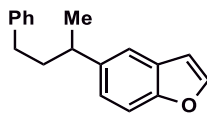

**47**

On 0.2 mmol scale, **General Procedure A** was followed with 4-phenylbutan-2-ol, 5-bromobenzofuran, and triphenylphosphine (7.0 equiv). Purification by column chromatography (silica gel, CH<sub>2</sub>Cl<sub>2</sub>) afforded crude **47**. Further purification by preparative TLC (silica gel, Petroleum ether) afforded **47** (33.0 mg, 66%).

**Physical state:** colorless oil;

**TLC:**  $R_f$  = 0.35 (silica gel, Petroleum Ether, UV);

**$^1\text{H}$  NMR** (400 MHz,  $\text{CDCl}_3$ ):  $\delta$  7.61 (d,  $J$  = 2.2 Hz, 1H), 7.45 (dt,  $J$  = 8.5, 0.8 Hz, 1H), 7.43 (dd,  $J$  = 1.5, 1.0 Hz, 1H), 7.29–7.24 (m, 2H), 7.20–7.16 (m, 1H), 7.16–7.12 (m, 3H), 6.74 (dd,  $J$  = 2.2, 1.0 Hz, 1H), 2.89–2.78 (m, 1H), 2.59–2.45 (m, 2H), 2.02–1.91 (m, 2H), 1.32 (d,  $J$  = 6.9 Hz, 3H) ppm;

**$^{13}\text{C}$  NMR** (101 MHz,  $\text{CDCl}_3$ ):  $\delta$  153.8, 145.2, 142.7, 142.0, 128.5, 128.4, 127.6, 125.8, 123.7, 119.3, 111.3, 106.7, 40.6, 39.6, 34.1, 23.3 ppm;

**HRMS** (ESI): Calcd for  $\text{C}_{18}\text{H}_{19}\text{O}$   $[\text{M}+\text{H}]^+$ : 251.1430; found 251.1430.

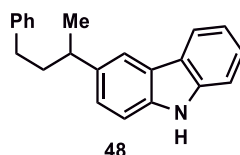

On 0.2 mmol scale, **General Procedure A** was followed with 4-phenylbutan-2-ol, 3-bromo-9H-carbazole, and triphenylphosphine (3.0 equiv). Purification by column chromatography (silica gel, 1:19, EtOAc:Petroleum ether) afforded **48** (37.1 mg, 62%).

**Physical state:** white solid;

**Melting point:** 129.0–131.01°C;

**TLC:**  $R_f$  = 0.62 (silica gel, 1:4, EtOAc:Petroleum Ether, UV);

**$^1\text{H}$  NMR** (400 MHz,  $\text{CDCl}_3$ ):  $\delta$  8.11–8.06 (m, 1H), 7.96 (br, s, 1H), 7.91 (d,  $J$  = 1.6 Hz, 1H), 7.45–7.40 (m, 2H), 7.39–7.36 (m, 1H), 7.30–7.25 (m, 3H), 7.25–7.21 (m, 1H), 7.20–7.13 (m, 3H), 2.98–2.85 (m, 1H), 2.64–2.50 (m, 2H), 2.11–1.95 (m, 2H), 1.39 (d,  $J$  = 7.0 Hz, 3H) ppm;

**$^{13}\text{C}$  NMR** (101 MHz,  $\text{CDCl}_3$ ):  $\delta$  142.9, 140.0, 138.7, 138.2, 128.6, 128.4, 125.8, 125.7, 125.4, 123.6, 123.5, 120.4, 119.4, 118.5, 110.7, 110.6, 40.7, 39.8, 34.2, 23.4 ppm;

**HRMS** (ESI): Calcd for  $\text{C}_{22}\text{H}_{22}\text{N}$   $[\text{M}+\text{H}]^+$ : 300.1747; found 300.1747.

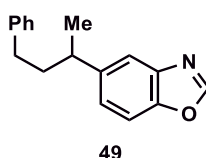

On 0.2 mmol scale, **General Procedure A** was followed with 4-phenylbutan-2-ol, 5-bromo-1,3-benzoxazole, and triphenylphosphine (7.0 equiv). Purification by column chromatography (silica gel, 1:20 EtOAc:Petroleum Ether) afforded crude **49**. Further purification by preparative TLC (silica gel, 1:15, EtOAc:Petroleum ether) followed by preparative HPLC (85% to 90%  $\text{CH}_3\text{CN}$ /water) afforded **49** (33.7 mg, 67%).

**Physical state:** yellow oil;

**TLC:**  $R_f$  = 0.34 (silica gel, 1:10, EtOAc:Petroleum Ether, UV);

**$^1\text{H}$  NMR** (400 MHz,  $\text{CDCl}_3$ ):  $\delta$  8.09 (s, 1H), 7.63 (d,  $J$  = 1.7 Hz, 1H), 7.52 (dd,  $J$  = 8.4, 0.6 Hz, 1H), 7.29–7.22 (m, 3H), 7.19–7.14 (m, 1H), 7.14–7.10 (m, 2H), 2.92–2.81 (m, 1H), 2.58–2.45 (m, 2H), 2.02–1.92 (m, 2H), 1.33 (d,  $J$  = 6.9 Hz, 3H) ppm;

**$^{13}\text{C}$  NMR** (101 MHz,  $\text{CDCl}_3$ ):  $\delta$  152.9, 148.6, 144.3, 142.4, 140.4, 128.5, 128.4, 125.8, 125.1, 118.7, 110.7, 40.4, 39.6, 34.0, 23.1 ppm;

**HRMS** (ESI): Calcd for  $\text{C}_{17}\text{H}_{18}\text{NO}$   $[\text{M}+\text{H}]^+$ : 252.1383; found 252.1383.

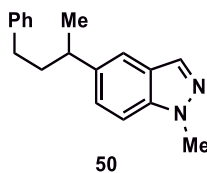

On 0.2 mmol scale, without treatment by hydrogen peroxide, **General Procedure A** was followed with 4-phenylbutan-2-ol, 5-bromo-1-methyl-benzimidazole, and triphenylphosphine (3.0 equiv). Purification by column chromatography (silica gel, 0:100 to 1:4 EtOAc:Petroleum Ether) afforded crude **50**. Further purification by preparative TLC (silica gel, 1:4, EtOAc:Petroleum ether) followed by preparative HPLC (85% to 95% CH<sub>3</sub>CN/water) afforded **50** (31.2 mg, 59%).

**Physical state:** white amorphous solid;

**TLC:**  $R_f$  = 0.33 (silica gel, 1:4, EtOAc:Petroleum Ether, UV);

**<sup>1</sup>H NMR** (400 MHz, CDCl<sub>3</sub>):  $\delta$  7.93 (d,  $J$  = 0.9 Hz, 1H), 7.54–7.52 (m, 1H), 7.36 (dt,  $J$  = 8.7, 0.9 Hz, 1H), 7.30–7.23 (m, 3H), 7.19–7.14 (m, 1H), 7.14 –7.10 (m, 2H), 4.07 (s, 3H), 2.92–2.78 (m, 1H), 2.60–2.45 (m, 2H), 2.04–1.91 (m, 2H), 1.33 (d,  $J$  = 6.9 Hz, 3H) ppm;

**<sup>13</sup>C NMR** (101 MHz, CDCl<sub>3</sub>):  $\delta$  142.6, 139.7, 139.1, 132.4, 128.5, 128.4, 126.4, 125.8, 124.4, 118.6, 109.1, 40.4, 39.5, 35.7, 34.1, 23.1 ppm;

**HRMS** (ESI): Calcd for C<sub>18</sub>H<sub>21</sub>N<sub>2</sub> [M+H]<sup>+</sup>: 265.1699; found 265.1700.

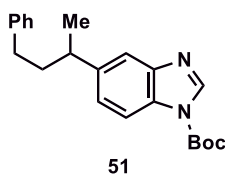

On 0.2 mmol scale, without treatment by hydrogen peroxide, **General Procedure A** was followed with 4-phenylbutan-2-ol, *tert*-butyl 5-bromo-benzimidazole-1-carboxylate, and triphenylphosphine (7.0 equiv). Purification by column chromatography (silica gel, 0:100 to 1:9 EtOAc:Petroleum Ether) afforded crude **51**. Further purification by preparative TLC (silica gel, 1:4, EtOAc:Petroleum ether) followed by preparative HPLC (90% to 95% CH<sub>3</sub>CN/water) afforded **51** (34.3 mg, 49%).

**Physical state:** colorless oil;

**TLC:**  $R_f$  = 0.46 (silica gel, 1:4, EtOAc:Petroleum Ether, UV);

**<sup>1</sup>H NMR** (400 MHz, CDCl<sub>3</sub>):  $\delta$  8.43 (s, 1H), 7.91 (d,  $J$  = 8.4 Hz, 1H), 7.64 (d,  $J$  = 1.5 Hz, 1H), 7.28–7.23 (m, 3H), 7.19–7.14 (m, 1H), 7.14–7.10 (m, 2H), 2.92–2.81 (m, 1H), 2.56–2.45 (m, 2H), 2.02–1.92 (m, 2H), 1.70 (s, 9H), 1.33 (d,  $J$  = 7.0 Hz, 3H) ppm;

**<sup>13</sup>C NMR** (101 MHz, CDCl<sub>3</sub>):  $\delta$  148.2, 144.4, 144.0, 142.6, 142.2, 129.8, 128.5, 128.4, 125.8, 124.9, 118.7, 114.3, 85.7, 40.4, 39.6, 34.0, 28.2, 23.1 ppm;

**HRMS** (ESI): Calcd for C<sub>22</sub>H<sub>27</sub>N<sub>2</sub>O<sub>2</sub> [M+H]<sup>+</sup>: 351.2067; found 351.2062.

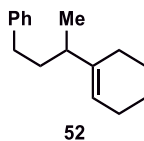

On 0.2 mmol scale, **General Procedure A** was followed with 4-phenylbutan-2-ol, 1-bromocyclohex-1-ene, and triphenylphosphine (7.0 equiv). Purification by column chromatography

(silica gel, 1:19 CH<sub>2</sub>Cl<sub>2</sub>:Petroleum Ether) afforded crude **52**. Further purification by preparative TLC (silica gel, pentane) afforded **52** (23.6 mg, 55%).

**Physical state:** colorless oil;

**TLC:** R<sub>f</sub> = 0.70 (silica gel, Petroleum Ether, UV);

**<sup>1</sup>H NMR** (400 MHz, CDCl<sub>3</sub>): δ 7.29–7.23 (m, 2H), 7.19–7.12 (m, 3H), 5.45–5.40 (m, 1H), 2.58–2.46 (m, 2H), 2.11–2.03 (m, 1H), 2.03–1.98 (m, 2H), 1.95–1.83 (m, 2H), 1.74–1.65 (m, 1H), 1.65–1.50 (m, 5H), 1.01 (d, *J* = 6.9 Hz, 3H) ppm;

**<sup>13</sup>C NMR** (101 MHz, CDCl<sub>3</sub>): δ 143.3, 141.6, 128.5, 128.4, 125.6, 120.9, 41.2, 37.0, 34.1, 25.4, 24.9, 23.3, 23.1, 19.9 ppm;

**HRMS** (ESI): Calcd for C<sub>16</sub>H<sub>23</sub> [M+H]<sup>+</sup>: 215.1794; found 215.1796.

## An Application of the Electrochemical Dehydroxylyative Arylation<sup>[1]</sup>

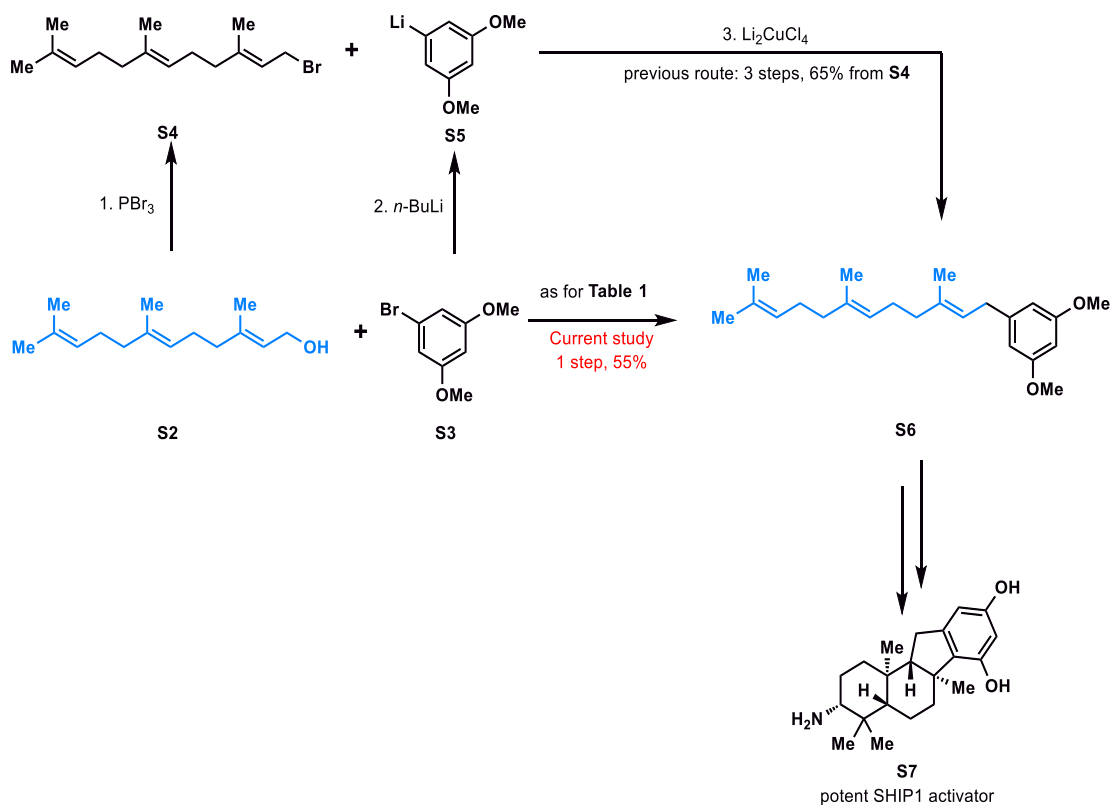

On 0.2 mmol scale, **General Procedure A** was followed with (*E,E*)-farnesol (**S2**), 1-bromo-3,5-dimethoxybenzene, and triphenylphosphine (3.0 equiv). Purification by column chromatography (silica gel, 0:100 to 1:9 EtOAc:Petroleum Ether) afforded crude **S6**. Further purification by preparative HPLC (80% to 91%  $\text{CH}_3\text{CN}/\text{water}$ ) afforded **S6** (37.7 mg, 55%).

**Physical state:** colorless oil;

**TLC:**  $R_f$  = 0.42 (silica gel, 3:47 EtOAc:Petroleum Ether, UV);

**$^1\text{H}$  NMR** (400 MHz,  $\text{CDCl}_3$ ):  $\delta$  6.35 (d,  $J$  = 2.3 Hz, 2H), 6.30 (t,  $J$  = 2.3 Hz, 1H), 5.36–5.30 (m, 1H), 5.16–5.06 (m, 2H), 3.77 (s, 6H), 3.30 (d,  $J$  = 7.3 Hz, 2H), 2.16–2.01 (m, 6H), 2.01–1.94 (m, 2H), 1.71 (d,  $J$  = 0.8 Hz, 3H), 1.68 (d,  $J$  = 1.3 Hz, 3H), 1.60 (s, 6H) ppm;

**$^{13}\text{C}$  NMR** (101 MHz,  $\text{CDCl}_3$ ):  $\delta$  160.9, 144.4, 136.7, 135.3, 131.4, 124.5, 124.2, 122.8, 106.6, 97.8, 55.4, 39.9, 34.6, 26.9, 26.8, 25.9, 17.8, 16.4, 16.2 ppm;

**HRMS** (ESI): Calcd for  $\text{C}_{23}\text{H}_{35}\text{O}_2$   $[\text{M}+\text{H}]^+$ : 343.2632; found 343.2631.

## Mechanistic Studies

### 1. Relative reactivity study

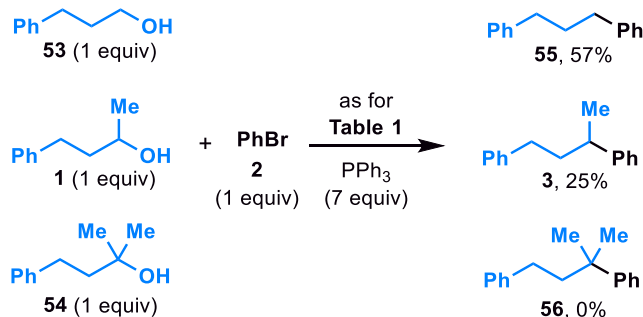

On 0.2 mmol scale, **General Procedure A** was followed with **53** (1.0 equiv), **1** (1.0 equiv), **54** (1.0 equiv), bromobenzene (1.0 equiv), and triphenylphosphine (7.0 equiv). Purification by column chromatography (silica gel, Petroleum Ether) followed by preparative TLC (silica gel, 1:1, CH<sub>2</sub>Cl<sub>2</sub>: Petroleum ether) afforded a mixture of **55** and **3**.

The yields of **55** and **3** was determined by <sup>1</sup>H NMR with CH<sub>2</sub>Br<sub>2</sub> (0.1 mmol) as internal standard.

The standard sample of **55** was purchased from Alfa Aesar.

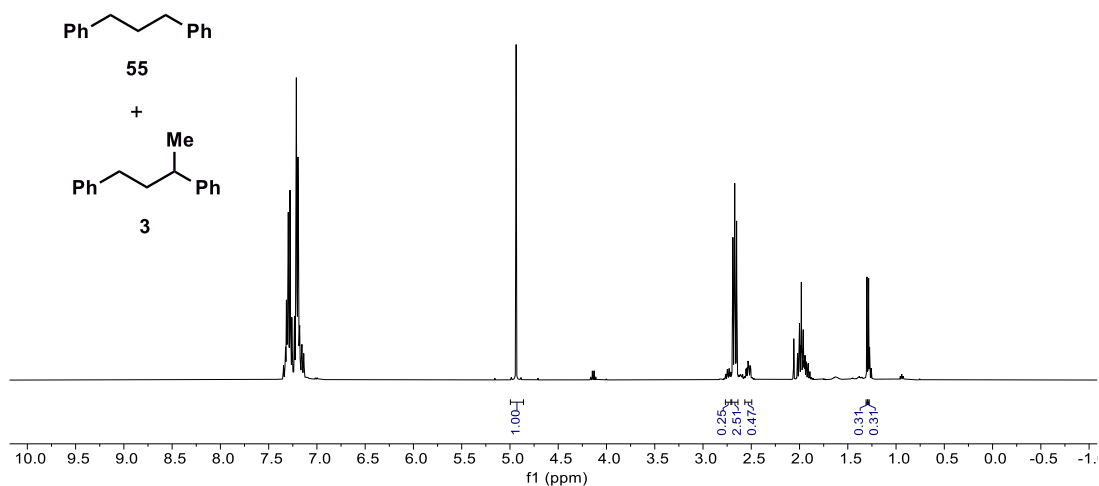

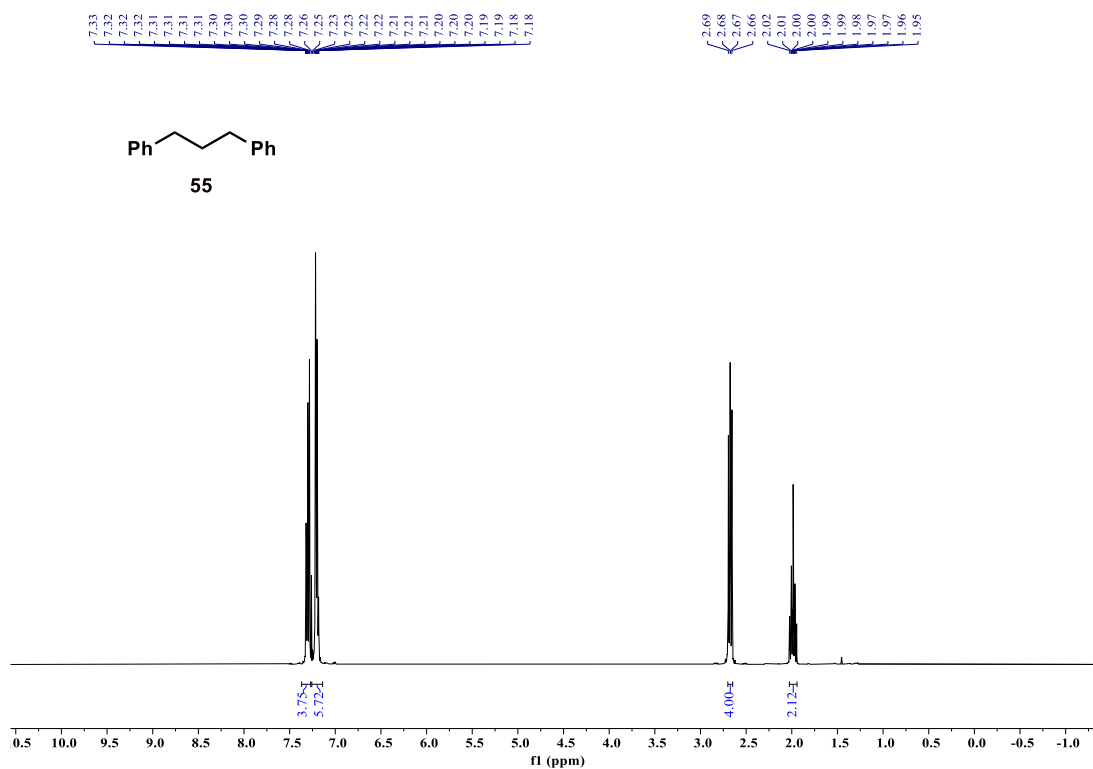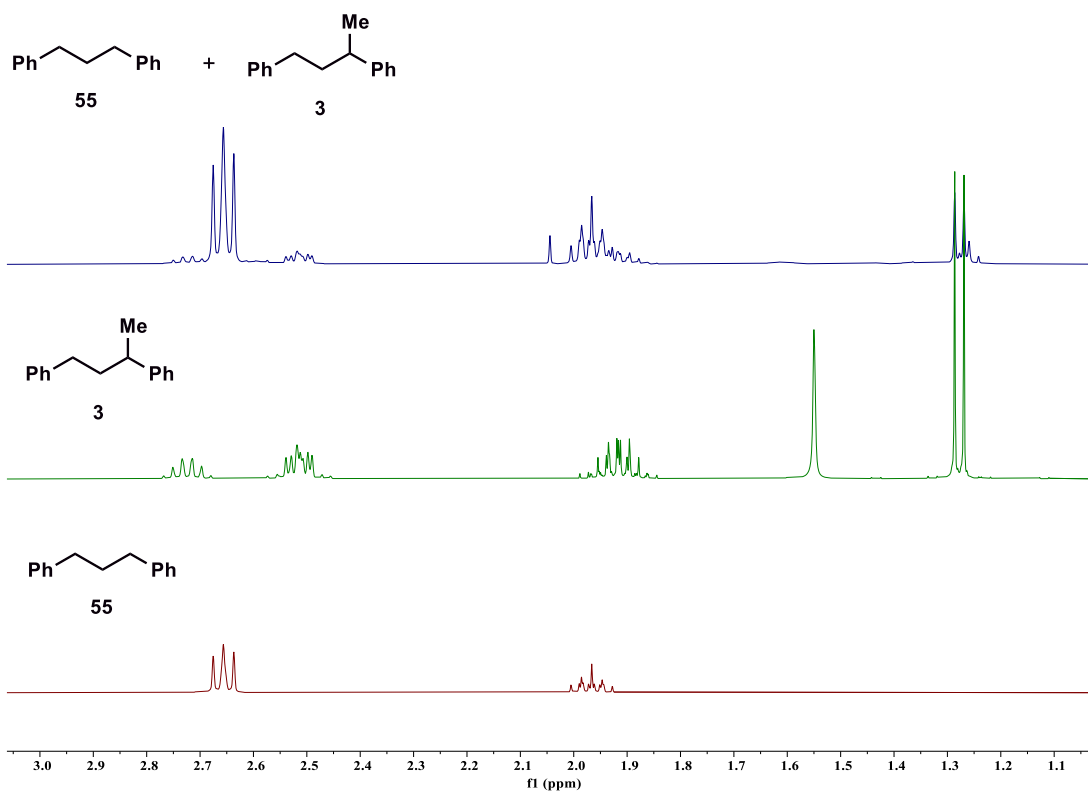

## 2. Radical ring opening

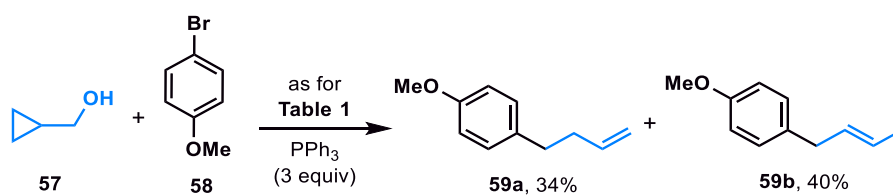

On 0.2 mmol scale, **General Procedure A** was followed with **57**, 4-bromoanisole (**58**), and triphenylphosphine (3.0 equiv). Purification by column chromatography (silica gel, Petroleum Ether) afforded a mixture of **59a** and **59b**.

The yield of **59a** and **59b** was determined by  $^1\text{H}$  NMR with  $\text{CH}_2\text{Br}_2$  (0.1 mmol) as internal standard.

The standard sample of **59a** was prepared according to König's procedure;<sup>[2]</sup> the standard sample of **59b** was prepared according to Gong's procedure.<sup>[3]</sup>

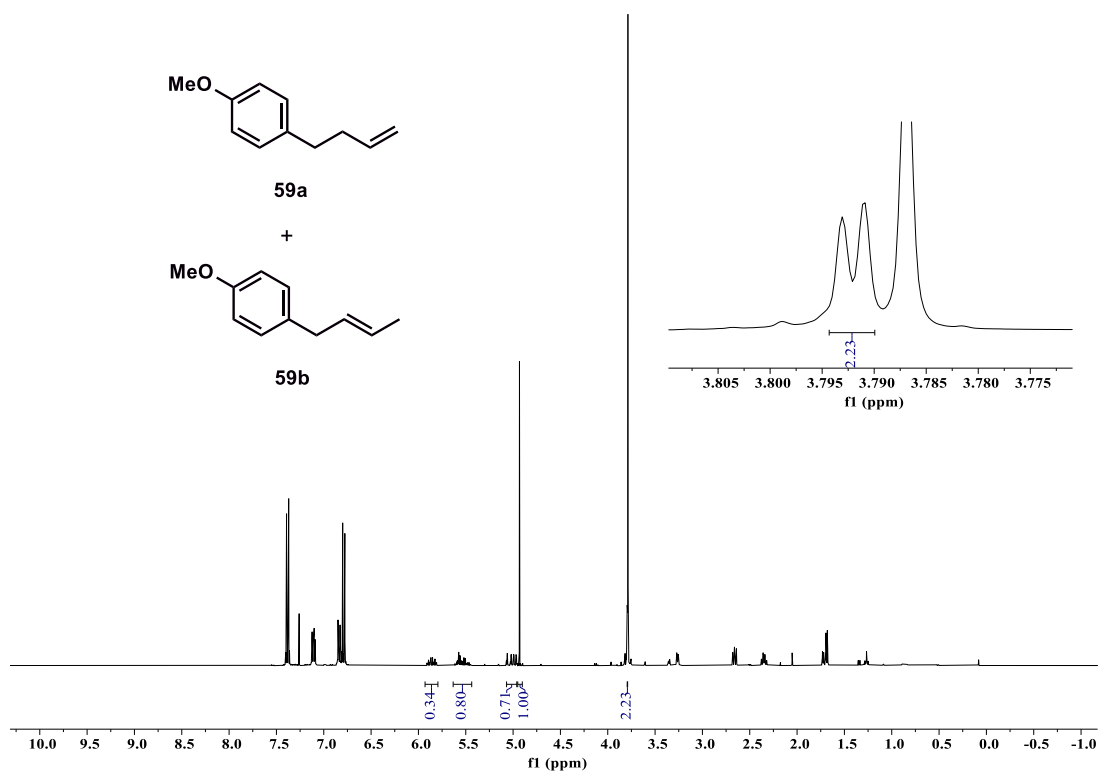

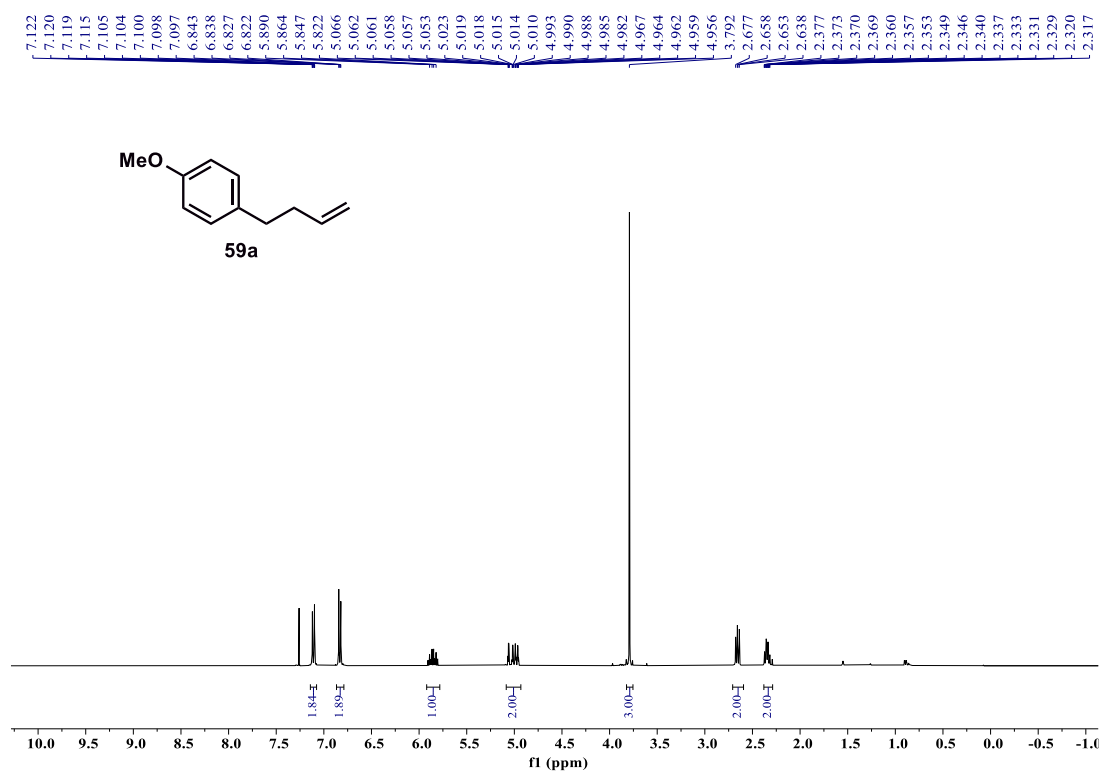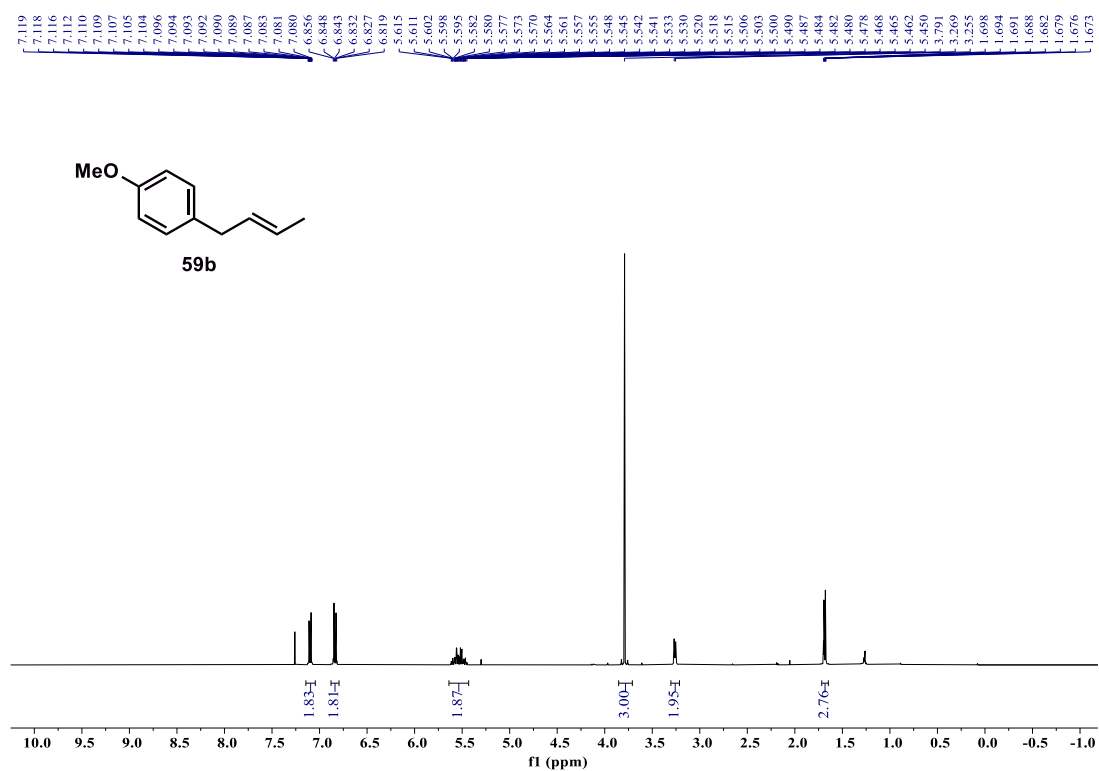

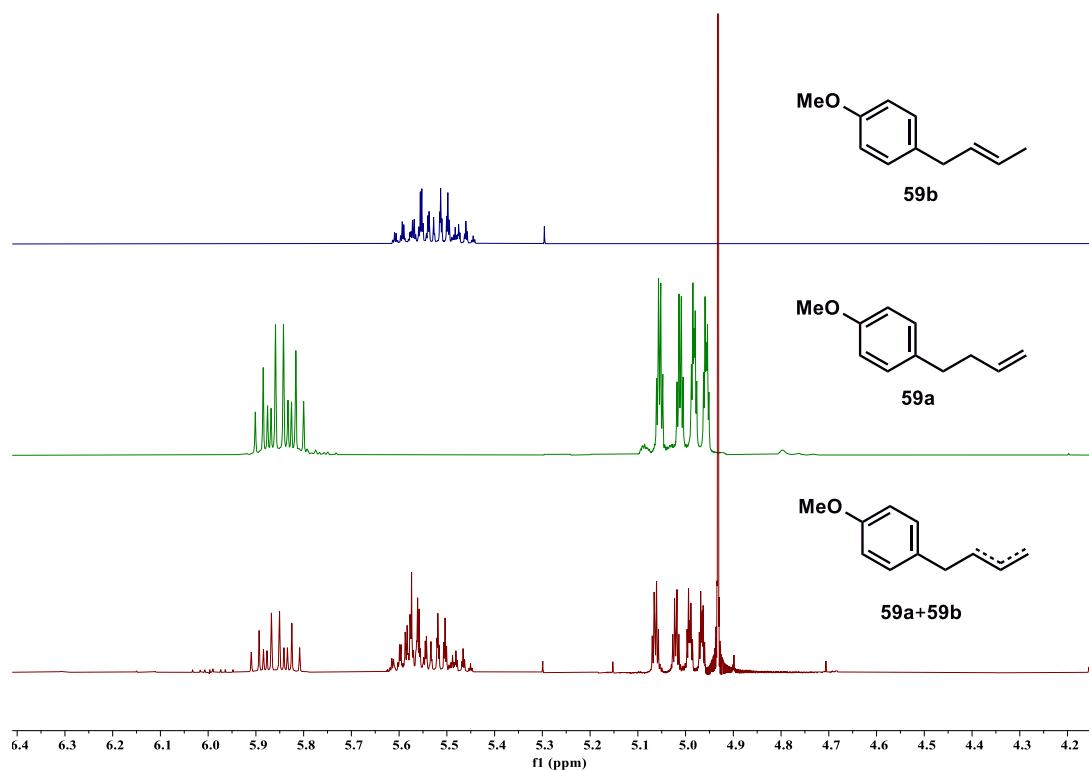

### 3. 5-*exo*-trig type cyclization

It was found that the monosubstituted alkenes could easily undergo migration before the 5-*exo*-trig cyclization. The desired cyclized product was not observed in this reaction conditions.

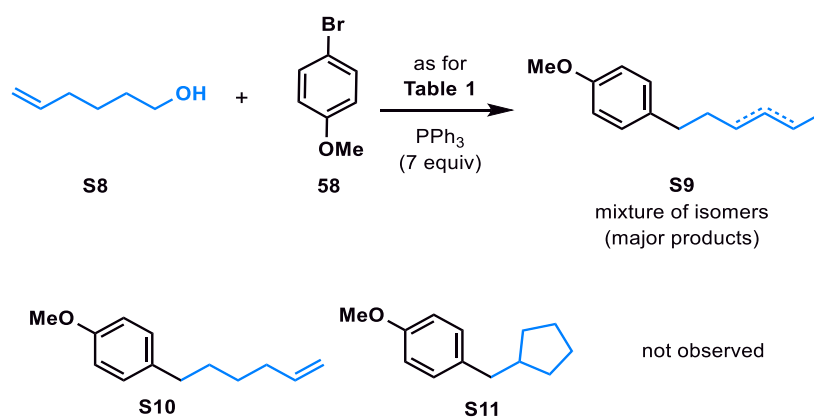

#### 4. Enantiopurity erosion

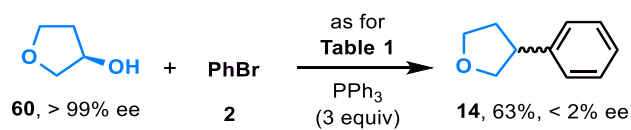

The *ee* value of **60** was determined by its benzoate ester.

*Method for determining the ee of the R-60 benzoate and Rac-60 benzoate:*

Column: Chiralpak® IE

Dimensions: 4.6 × 250 mm

Eluent: *n*-hexane:IPA = 99:1

Flow rate: 1.0 mL/min

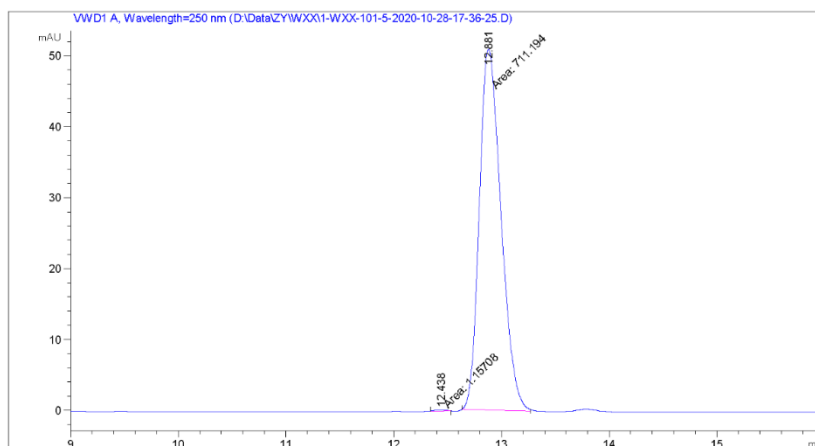

Signal 1: WVD1 A, Wavelength=250 nm

| Peak #   | RetTime [min] | Type | Width [min] | Area [mAU*s] | Height [mAU] | Area %  |
|----------|---------------|------|-------------|--------------|--------------|---------|
| 1        | 12.438        | MM   | 0.1308      | 1.15708      | 1.47455e-1   | 0.1624  |
| 2        | 12.881        | MM   | 0.2328      | 711.19403    | 50.92102     | 99.8376 |
| Totals : |               |      |             | 712.35111    | 51.06848     |         |

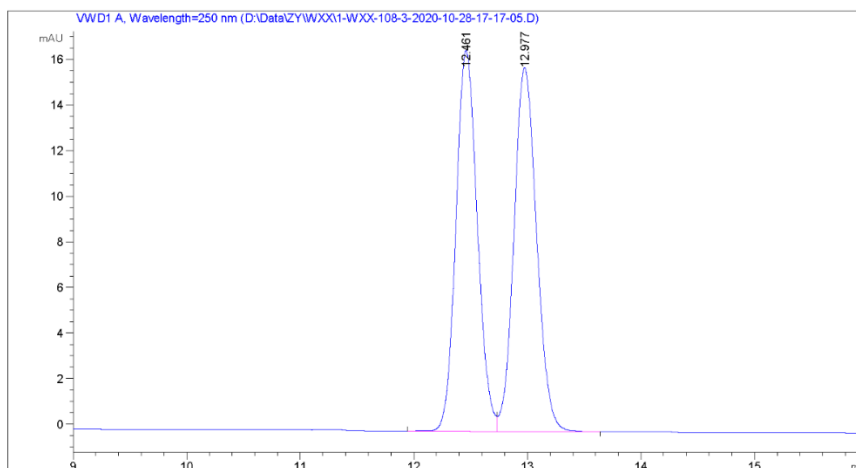

Signal 1: WVD1 A, Wavelength=250 nm

| Peak #   | RetTime [min] | Type | Width [min] | Area [mAU*s] | Height [mAU] | Area %  |
|----------|---------------|------|-------------|--------------|--------------|---------|
| 1        | 12.461        | BV   | 0.2025      | 218.47711    | 16.71409     | 49.6626 |
| 2        | 12.977        | VB   | 0.2147      | 221.44586    | 15.97765     | 50.3374 |
| Totals : |               |      |             | 439.92297    | 32.69174     |         |

Method for determining the ee value of the coupling products from **R-60** and **Rac-60**:

Column: Chiralpak® IE

Dimensions: 4.6 ×250 mm

Eluent: *n*-hexane:IPA = 99.5:0.5

Flow rate: 1.0 mL/min

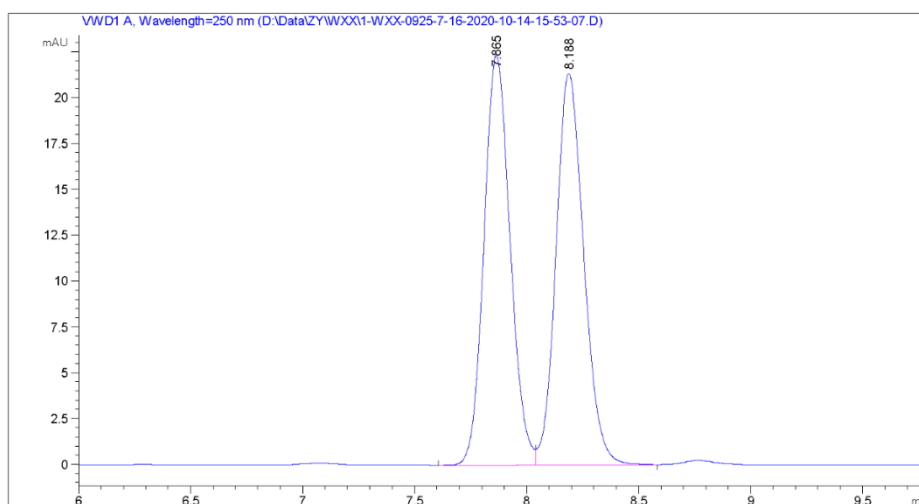

Signal 1: VWD1 A, Wavelength=250 nm

| Peak #   | RetTime [min] | Type | Width [min] | Area [mAU*s] | Height [mAU] | Area %  |
|----------|---------------|------|-------------|--------------|--------------|---------|
| 1        | 7.865         | BV   | 0.1267      | 181.28423    | 22.34322     | 49.6946 |
| 2        | 8.188         | VB   | 0.1333      | 183.51257    | 21.35150     | 50.3054 |
| Totals : |               |      |             | 364.79680    | 43.69472     |         |

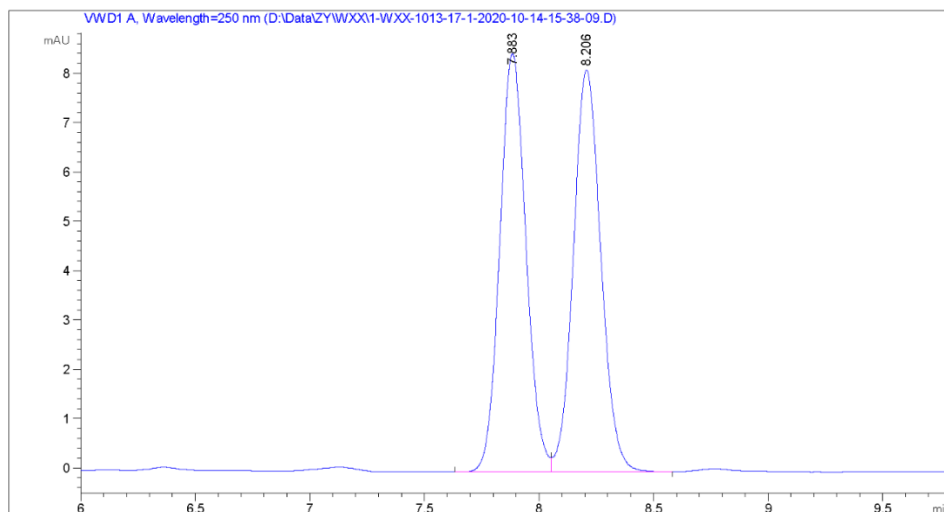

Signal 1: VWD1 A, Wavelength=250 nm

| Peak #   | RetTime [min] | Type | Width [min] | Area [mAU*s] | Height [mAU] | Area %  |
|----------|---------------|------|-------------|--------------|--------------|---------|
| 1        | 7.883         | BV   | 0.1224      | 67.17370     | 8.47946      | 49.7633 |
| 2        | 8.206         | VB   | 0.1290      | 67.81274     | 8.15273      | 50.2367 |
| Totals : |               |      |             | 134.98644    | 16.63220     |         |

## 5. Ligand exchange experiments

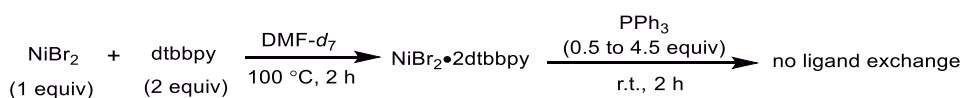

A screw-capped culture tube charged with a magnetic stir bar was moved into a glove box. NiBr<sub>2</sub> (21.9 mg, 0.1 mmol), dtbbpy (**L1**, 53.9 mg, 0.2 mmol), and DMF-*d*<sub>7</sub> (1 mL) were added. The resulting mixture was stirred at 100 °C for 2 hours and then cooled to room temperature.

PPh<sub>3</sub> was added, and the mixture was stirred for additional 2 hours at room temperature.

The reaction mixture was detected by <sup>31</sup>P NMR. <sup>31</sup>P NMR (162 MHz, DMF-*d*<sub>7</sub>) δ –5.87 (PPh<sub>3</sub>). It was shown that the addition of PPh<sub>3</sub> didn't result in the ligand exchange.

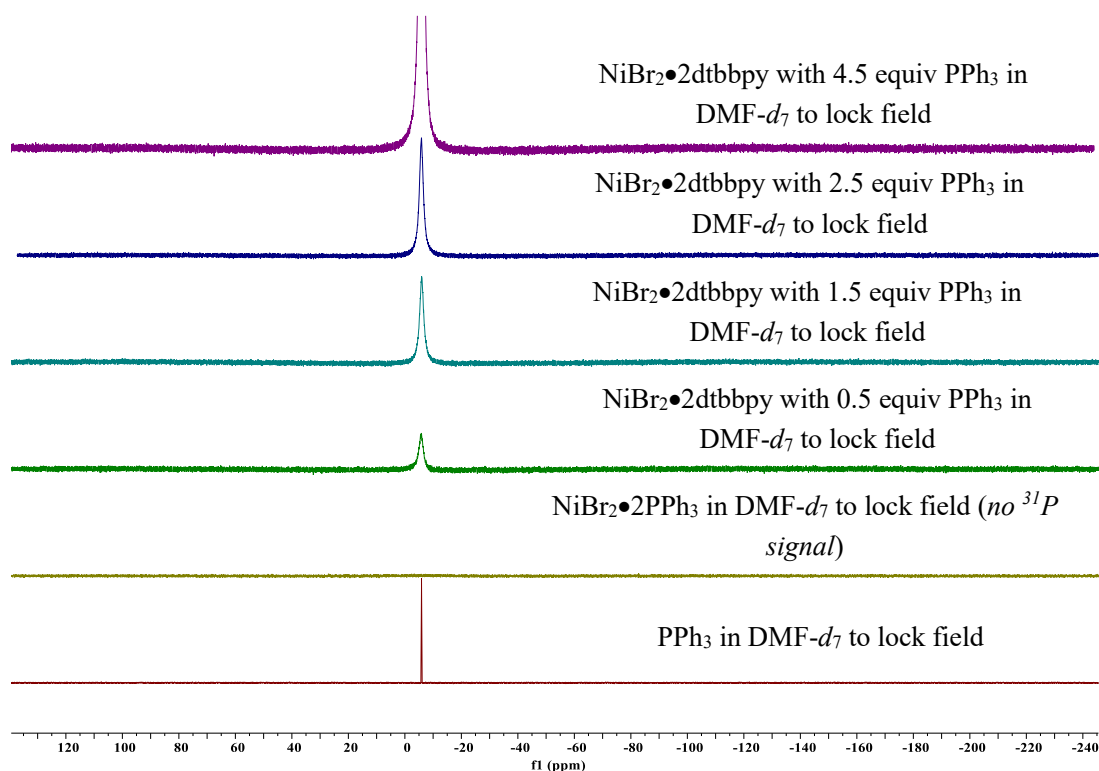

Additionally, according to the study from the group of Xie,<sup>[4]</sup> the ligand exchange between Ni(II) aryl complex and PPh<sub>3</sub> was deemed unlikely to occur.

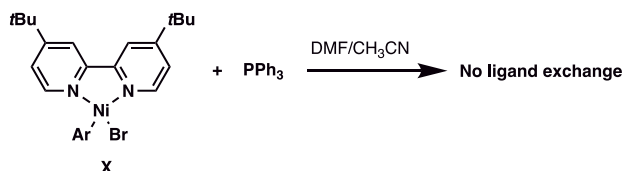

Moreover, given that: 1) this coupling reaction did not proceed in the absence of dtbbpy (**L1**, Table 1, entry 3); 2) not all of the bipyridyl ligands worked fine (e.g. **L6** in Table S14), the possibility that ligand exchange occurred in the reaction conditions could be further ruled out.

## Cyclic Voltammetry Data

All cyclic voltammetry studies were performed in a glovebox with the IKA ElectraSyn 2.0.

Measurements were performed in 0.1 M LiClO<sub>4</sub> in anhydrous NMP.

Reference electrode: Ag/AgCl (Ag wire in aqueous 3 M KCl);

Working electrode: glassy carbon disc electrode;

Counter electrode: platinum plate electrode

Scan rate = 100 mV/s.

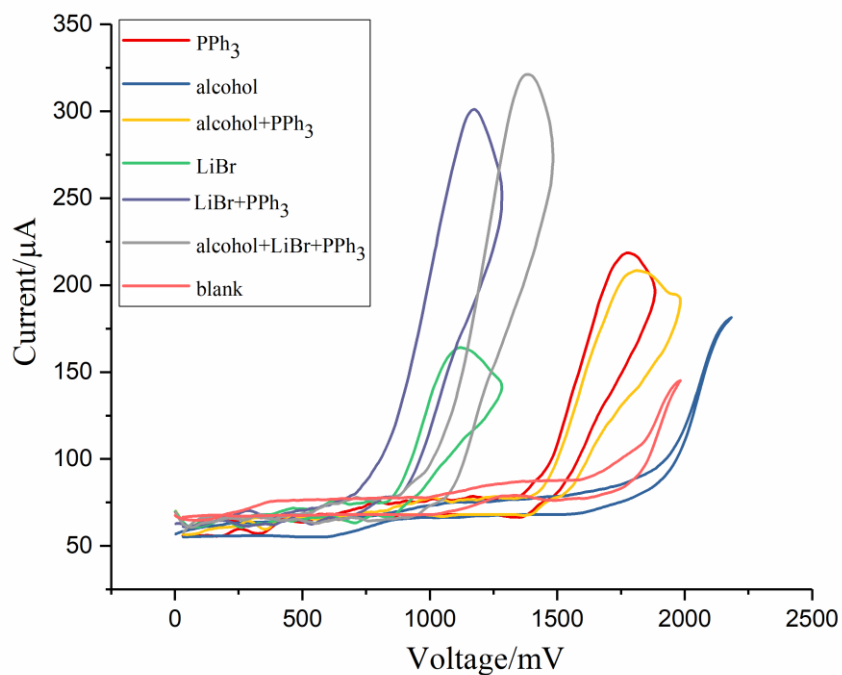

**Figure S6.** Cyclic voltammetry studies

## References

- [1] Meimetis, L. G.; Nodwell, M.; Yang, L.; Wang, X.; Wu, J.; Harwig, C.; Stenton, G. R.; Mackenzie, L. F.; MacRury, T.; Patrick, B. O.; Ming Lum, A.; Ong, C. J.; Krystal, G.; Mui, A. L. F.; Andersen, R. J., Synthesis of SHIP1-Activating Analogs of the Sponge Meroterpenoid Pelorol. *Eur. J. Org. Chem.* **2012**, 2012, 5195–5207.
- [2] Meng, Q. Y.; Schirmer, T. E.; Katou, K.; König, B., Controllable Isomerization of Alkenes by Dual Visible-Light-Cobalt Catalysis. *Angew. Chem. Int. Ed.* **2019**, 58, 5723–5728.
- [3] Cui, X.; Wang, S.; Zhang, Y.; Deng, W.; Qian, Q.; Gong, H., Nickel-catalyzed reductive allylation of aryl bromides with allylic acetates. *Org. Biomol. Chem.* **2013**, 11, 3094–3097.
- [4] Ruzi, R.; Liu, K.; Zhu, C.; Xie, J., Upgrading ketone synthesis direct from carboxylic acids and organohalides. *Nat. Commun.* **2020**, 11, 3312.

## Single Crystal X-ray Diffraction Data

### X-ray crystallographic data for 31a

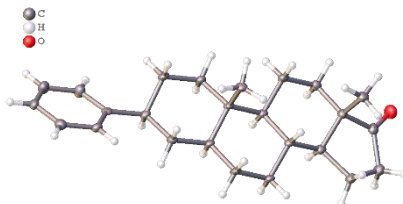

**Table S16.** Crystal data and structure refinement for **31a**.

|                                             |                                                               |
|---------------------------------------------|---------------------------------------------------------------|
| Identification code                         | CCDC 2049258                                                  |
| Empirical formula                           | C <sub>25</sub> H <sub>34</sub> O                             |
| Formula weight                              | 350.52                                                        |
| Temperature/K                               | 100.00(10)                                                    |
| Crystal system                              | monoclinic                                                    |
| Space group                                 | P2 <sub>1</sub>                                               |
| a/Å                                         | 10.4271(2)                                                    |
| b/Å                                         | 6.24210(10)                                                   |
| c/Å                                         | 15.6044(4)                                                    |
| α/°                                         | 90                                                            |
| β/°                                         | 105.739(2)                                                    |
| γ/°                                         | 90                                                            |
| Volume/Å <sup>3</sup>                       | 977.56(4)                                                     |
| Z                                           | 2                                                             |
| ρ <sub>calc</sub> /cm <sup>3</sup>          | 1.191                                                         |
| μ/mm <sup>-1</sup>                          | 0.527                                                         |
| F(000)                                      | 384.0                                                         |
| Crystal size/mm <sup>3</sup>                | 0.34 × 0.05 × 0.03                                            |
| Radiation                                   | CuKα (λ = 1.54184)                                            |
| 2θ range for data collection/°              | 8.81 to 147.454                                               |
| Index ranges                                | -11 ≤ h ≤ 12, -7 ≤ k ≤ 7, -19 ≤ l ≤ 19                        |
| Reflections collected                       | 17733                                                         |
| Independent reflections                     | 3857 [R <sub>int</sub> = 0.1191, R <sub>sigma</sub> = 0.0665] |
| Data/restraints/parameters                  | 3857/1/237                                                    |
| Goodness-of-fit on F <sup>2</sup>           | 1.095                                                         |
| Final R indexes [I ≥ 2σ (I)]                | R <sub>1</sub> = 0.0481, wR <sub>2</sub> = 0.1258             |
| Final R indexes [all data]                  | R <sub>1</sub> = 0.0541, wR <sub>2</sub> = 0.1323             |
| Largest diff. peak/hole / e Å <sup>-3</sup> | 0.19/-0.29                                                    |

**Table S17.** Fractional Atomic Coordinates ( $\times 10^4$ ) and Equivalent Isotropic Displacement Parameters ( $\text{\AA}^2 \times 10^3$ ) for **31**.  $U_{\text{eq}}$  is defined as 1/3 of the trace of the orthogonalised  $U_{ij}$  tensor.

| Atom | $x$        | $y$     | $z$        | $U(\text{eq})$ |
|------|------------|---------|------------|----------------|
| O25  | 2772.4(19) | 1168(4) | -105.0(13) | 28.0(5)        |
| C5   | 3044(2)    | 5960(4) | 2407.0(15) | 13.6(5)        |
| C18  | 2472(2)    | 6238(4) | 6633.3(16) | 15.6(5)        |
| C13  | 2484(2)    | 4280(4) | 2942.7(16) | 13.8(5)        |
| C23  | 2571(2)    | 8340(4) | 6932.1(16) | 16.2(5)        |
| C9   | 3080(2)    | 2730(4) | 368.5(16)  | 18.4(6)        |
| C4   | 4165(2)    | 7280(4) | 3018.5(16) | 16.0(5)        |
| C21  | 2217(2)    | 7254(5) | 8336.1(16) | 18.6(5)        |
| C22  | 2447(2)    | 8849(5) | 7781.2(16) | 19.1(5)        |
| C7   | 4181(2)    | 5992(5) | 1071.4(16) | 18.8(6)        |
| C6   | 3512(2)    | 4786(4) | 1689.0(16) | 15.7(5)        |
| C1   | 2027(2)    | 5303(4) | 3720.9(16) | 13.8(5)        |
| C15  | 1407(2)    | 4386(4) | 5166.4(16) | 17.8(5)        |
| C10  | 2382(2)    | 3526(4) | 1050.8(16) | 15.9(5)        |
| C2   | 3240(2)    | 6526(4) | 4314.4(16) | 14.7(5)        |
| C16  | 1636(2)    | 3540(4) | 4297.9(16) | 16.6(5)        |
| C12  | 1405(2)    | 2870(4) | 2328.4(16) | 17.0(5)        |
| C11  | 1858(2)    | 1820(4) | 1569.7(16) | 18.4(6)        |
| C19  | 2250(3)    | 4661(5) | 7208.6(17) | 22.1(6)        |
| C3   | 3732(2)    | 8264(4) | 3789.4(16) | 17.2(5)        |
| C14  | 2637(2)    | 5567(4) | 5732.7(16) | 15.3(5)        |
| C17  | 3009(2)    | 7374(4) | 5184.2(17) | 16.7(5)        |
| C24  | 825(2)     | 6800(5) | 3362.9(17) | 19.2(6)        |
| C26  | 1232(2)    | 4952(5) | 510.8(17)  | 20.3(6)        |
| C20  | 2114(3)    | 5156(5) | 8046.9(18) | 23.9(6)        |
| C8   | 4221(2)    | 4272(5) | 375.9(17)  | 21.1(6)        |

## X-ray crystallographic data for 36

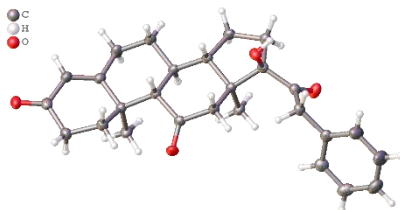

**Table S18.** Crystal data and structure refinement for **36**.

|                                                              |                                                                              |
|--------------------------------------------------------------|------------------------------------------------------------------------------|
| Identification code                                          | CCDC 2049257                                                                 |
| Empirical formula                                            | C <sub>27</sub> H <sub>32</sub> O <sub>4</sub>                               |
| Formula weight                                               | 420.553                                                                      |
| Temperature/K                                                | 100.00(10)                                                                   |
| Crystal system                                               | orthorhombic                                                                 |
| Space group                                                  | P2 <sub>1</sub> 2 <sub>1</sub> 2 <sub>1</sub>                                |
| <i>a</i> /Å                                                  | 8.0345(1)                                                                    |
| <i>b</i> /Å                                                  | 12.2693(1)                                                                   |
| <i>c</i> /Å                                                  | 22.3318(2)                                                                   |
| $\alpha$ /°                                                  | 90                                                                           |
| $\beta$ /°                                                   | 90                                                                           |
| $\gamma$ /°                                                  | 90                                                                           |
| Volume/Å <sup>3</sup>                                        | 2201.42(4)                                                                   |
| <i>Z</i>                                                     | 4                                                                            |
| $\rho_{\text{calc}}$ /cm <sup>3</sup>                        | 1.269                                                                        |
| $\mu$ /mm <sup>-1</sup>                                      | 0.666                                                                        |
| <i>F</i> (000)                                               | 906.8                                                                        |
| Crystal size/mm <sup>3</sup>                                 | 0.17 × 0.17 × 0.12                                                           |
| Radiation                                                    | Cu K $\alpha$ ( $\lambda$ = 1.54184)                                         |
| 2 $\theta$ range for data collection/°                       | 7.92 to 150.3                                                                |
| Index ranges                                                 | -7 ≤ <i>h</i> ≤ 10, -14 ≤ <i>k</i> ≤ 15, -28 ≤ <i>l</i> ≤ 27                 |
| Reflections collected                                        | 25049                                                                        |
| Independent reflections                                      | 4454 [ <i>R</i> <sub>int</sub> = 0.0383, <i>R</i> <sub>sigma</sub> = 0.0214] |
| Data/restraints/parameters                                   | 4454/0/283                                                                   |
| Goodness-of-fit on <i>F</i> <sup>2</sup>                     | 1.046                                                                        |
| Final <i>R</i> indexes [ <i>I</i> ≥ 2 $\sigma$ ( <i>I</i> )] | <i>R</i> <sub>1</sub> = 0.0327, <i>wR</i> <sub>2</sub> = 0.0835              |
| Final <i>R</i> indexes [all data]                            | <i>R</i> <sub>1</sub> = 0.0337, <i>wR</i> <sub>2</sub> = 0.0844              |
| Largest diff. peak/hole / e Å <sup>-3</sup>                  | 0.15/-0.19                                                                   |
| Flack parameter                                              | -0.13(13)                                                                    |

**Table S19.** Fractional Atomic Coordinates ( $\times 10^4$ ) and Equivalent Isotropic Displacement Parameters ( $\text{\AA}^2 \times 10^3$ ) for **36**.  $U_{\text{eq}}$  is defined as 1/3 of the trace of the orthogonalised  $U_{\text{ij}}$  tensor.

| Atom | <i>x</i>   | <i>y</i>    | <i>z</i>   | <i>U</i> (eq) |
|------|------------|-------------|------------|---------------|
| O23  | 5235.7(12) | 4310.5(8)   | 4484.7(4)  | 24.7(2)       |
| O21  | 2770.7(12) | 7953.5(8)   | 3739.8(5)  | 29.3(2)       |
| O22  | 6419.2(14) | 12292.1(8)  | 4826.9(5)  | 32.2(2)       |
| O19  | 4838.9(13) | 3230.7(9)   | 3046.9(4)  | 32.4(2)       |
| C15  | 3951.8(16) | 7444.2(11)  | 3933.5(6)  | 20.9(3)       |
| C4   | 6920.5(15) | 6133.5(11)  | 3995.4(5)  | 20.3(3)       |
| C18  | 4402.0(17) | 3677.3(10)  | 3502.5(6)  | 23.1(3)       |
| C10  | 6162.7(19) | 11383.8(11) | 4613.2(6)  | 26.0(3)       |
| C1   | 5571.4(16) | 4427.3(11)  | 3860.6(5)  | 21.5(3)       |
| C24  | 5262.1(17) | 5832.0(11)  | 3031.6(6)  | 24.4(3)       |
| C8   | 7350.1(16) | 9655.7(11)  | 4240.3(6)  | 23.4(3)       |
| C17  | 5328.1(15) | 5657.4(10)  | 3712.4(5)  | 19.5(2)       |
| C13  | 5665.9(16) | 9232.4(11)  | 4029.0(5)  | 20.0(2)       |
| C3   | 8297.2(16) | 5361.7(12)  | 3779.9(6)  | 25.2(3)       |
| C9   | 7519.4(18) | 10620.9(12) | 4517.2(6)  | 28.3(3)       |
| C5   | 7129.0(15) | 7348.8(11)  | 3886.1(6)  | 20.3(3)       |
| C12  | 4288.7(17) | 9790.2(11)  | 4398.1(6)  | 25.1(3)       |
| C14  | 5585.5(16) | 7976.6(10)  | 4128.7(5)  | 19.0(2)       |
| C26  | 1446.4(16) | 3005.5(11)  | 3328.0(6)  | 25.0(3)       |
| C31  | 866.9(18)  | 3565.1(13)  | 2829.0(6)  | 29.2(3)       |
| C20  | 2651.1(16) | 3531.4(11)  | 3755.4(6)  | 24.3(3)       |
| C6   | 8685.6(16) | 7786.6(11)  | 4196.1(7)  | 27.9(3)       |
| C16  | 3825.4(16) | 6216.0(11)  | 4005.6(6)  | 21.6(3)       |
| C2   | 7432.7(16) | 4235.2(12)  | 3720.6(6)  | 25.5(3)       |
| C30  | -279.6(18) | 3106.0(15)  | 2443.6(6)  | 34.6(3)       |
| C25  | 5499.4(18) | 9517.4(11)  | 3357.8(5)  | 26.1(3)       |
| C7   | 8880.7(17) | 9007.1(12)  | 4089.1(7)  | 31.9(3)       |
| C11  | 4462.2(18) | 11030.9(11) | 4416.3(6)  | 27.0(3)       |
| C29  | -862(2)    | 2067.8(16)  | 2548.0(8)  | 44.1(4)       |
| C27  | 837(2)     | 1966.8(14)  | 3432.7(9)  | 43.0(4)       |
| C28  | -310(3)    | 1500.9(15)  | 3042.4(10) | 55.3(5)       |

## X-ray crystallographic data for 48

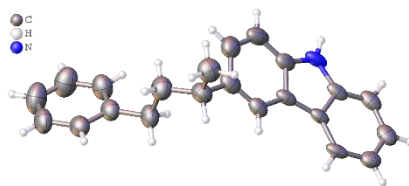

**Table S20.** Crystal data and structure refinement for **48**.

|                                             |                                                               |
|---------------------------------------------|---------------------------------------------------------------|
| Identification code                         | CCDC 2049256                                                  |
| Empirical formula                           | C <sub>22</sub> H <sub>21</sub> N                             |
| Formula weight                              | 299.40                                                        |
| Temperature/K                               | 100.00(10)                                                    |
| Crystal system                              | orthorhombic                                                  |
| Space group                                 | Pca2 <sub>1</sub>                                             |
| a/Å                                         | 11.6809(3)                                                    |
| b/Å                                         | 19.0963(6)                                                    |
| c/Å                                         | 7.3771(2)                                                     |
| α/°                                         | 90                                                            |
| β/°                                         | 90                                                            |
| γ/°                                         | 90                                                            |
| Volume/Å <sup>3</sup>                       | 1645.55(8)                                                    |
| Z                                           | 4                                                             |
| ρ <sub>calc</sub> /cm <sup>3</sup>          | 1.208                                                         |
| μ/mm <sup>-1</sup>                          | 0.526                                                         |
| F(000)                                      | 640.0                                                         |
| Crystal size/mm <sup>3</sup>                | 0.41 × 0.32 × 0.02                                            |
| Radiation                                   | CuKα (λ = 1.54184)                                            |
| 2θ range for data collection/°              | 8.874 to 151.154                                              |
| Index ranges                                | -14 ≤ h ≤ 14, -23 ≤ k ≤ 23, -8 ≤ l ≤ 7                        |
| Reflections collected                       | 22045                                                         |
| Independent reflections                     | 2752 [R <sub>int</sub> = 0.0623, R <sub>sigma</sub> = 0.0243] |
| Data/restraints/parameters                  | 2752/1/209                                                    |
| Goodness-of-fit on F <sup>2</sup>           | 1.031                                                         |
| Final R indexes [I ≥ 2σ (I)]                | R <sub>1</sub> = 0.0604, wR <sub>2</sub> = 0.1608             |
| Final R indexes [all data]                  | R <sub>1</sub> = 0.0644, wR <sub>2</sub> = 0.1666             |
| Largest diff. peak/hole / e Å <sup>-3</sup> | 0.37/-0.20                                                    |
| Flack parameter                             | -0.2(5)                                                       |

**Table S21.** Fractional Atomic Coordinates ( $\times 10^4$ ) and Equivalent Isotropic Displacement Parameters ( $\text{\AA}^2 \times 10^3$ ) for **49**.  $U_{\text{eq}}$  is defined as 1/3 of the trace of the orthogonalised  $U_{\text{ij}}$  tensor.

| Atom | <i>x</i> | <i>y</i>   | <i>z</i> | $U(\text{eq})$ |
|------|----------|------------|----------|----------------|
| N9   | 2516(3)  | 4440.7(17) | 8897(4)  | 47.8(8)        |
| C2   | 4101(3)  | 4839.2(19) | 7469(5)  | 37.9(8)        |
| C1   | 3054(3)  | 5040(2)    | 8297(5)  | 41.0(8)        |
| C3   | 4164(3)  | 4093(2)    | 7588(5)  | 41.2(8)        |
| C13  | 4832(3)  | 5364(2)    | 6814(5)  | 44.6(9)        |
| C8   | 3178(3)  | 3862(2)    | 8522(5)  | 45.8(9)        |
| C4   | 4995(3)  | 3601(2)    | 7062(6)  | 46.2(9)        |
| C12  | 4505(4)  | 6056(2)    | 6976(5)  | 51.2(10)       |
| C18  | 4563(4)  | 1340(2)    | 2993(6)  | 56.2(11)       |
| C10  | 2731(3)  | 5729(2)    | 8439(5)  | 50.9(10)       |
| C7   | 3036(4)  | 3163(3)    | 8944(6)  | 60.9(12)       |
| C11  | 3463(4)  | 6230(2)    | 7765(6)  | 54.6(10)       |
| C5   | 4875(3)  | 2917(2)    | 7440(6)  | 56.8(11)       |
| C6   | 3907(4)  | 2700(2)    | 8420(6)  | 63.9(12)       |
| C23  | 5274(4)  | 903(2)     | 2005(7)  | 60.1(11)       |
| C22  | 4860(5)  | 333(2)     | 1056(8)  | 72.3(14)       |
| C14  | 5838(4)  | 2396(2)    | 6986(7)  | 61.4(11)       |
| C16  | 5012(4)  | 1962(2)    | 3993(7)  | 62.5(12)       |
| C15  | 5418(5)  | 1774(2)    | 5903(7)  | 71.1(14)       |
| C17  | 6437(4)  | 2159(3)    | 8679(8)  | 72.8(14)       |
| C19  | 3420(4)  | 1169(3)    | 3032(8)  | 71.4(14)       |
| C21  | 3699(6)  | 186(3)     | 1105(10) | 92.0(19)       |
| C20  | 3002(5)  | 604(3)     | 2066(11) | 91.9(19)       |

# NMR Spectra

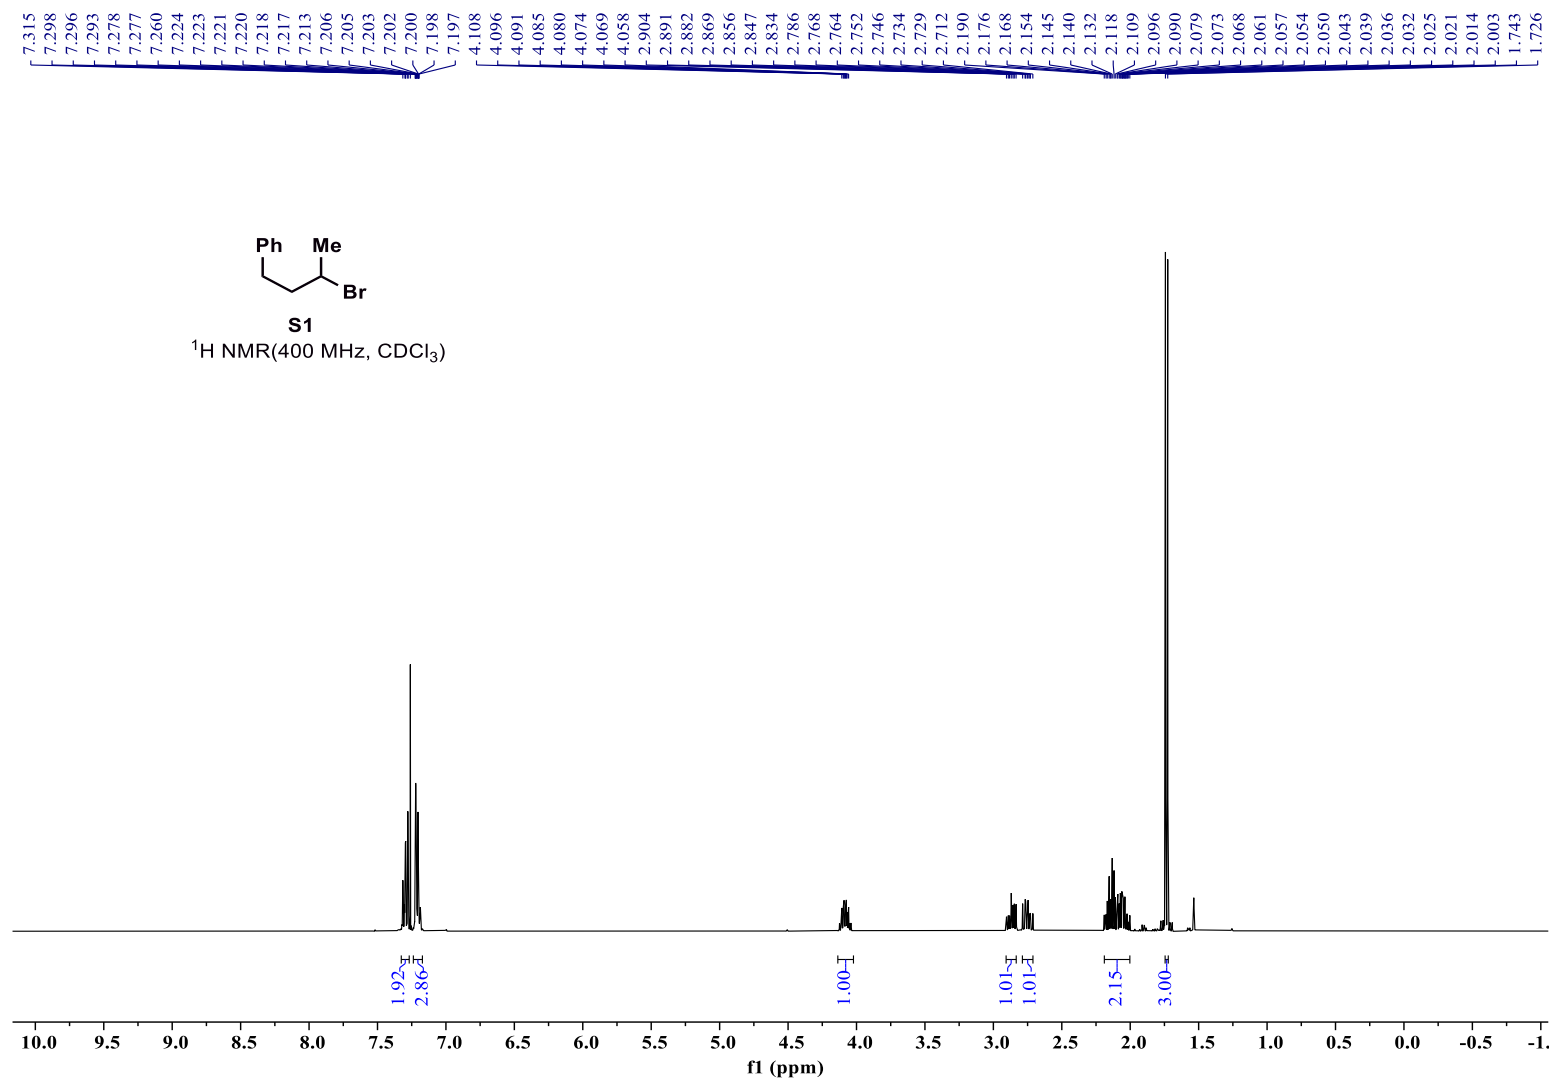

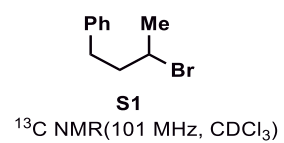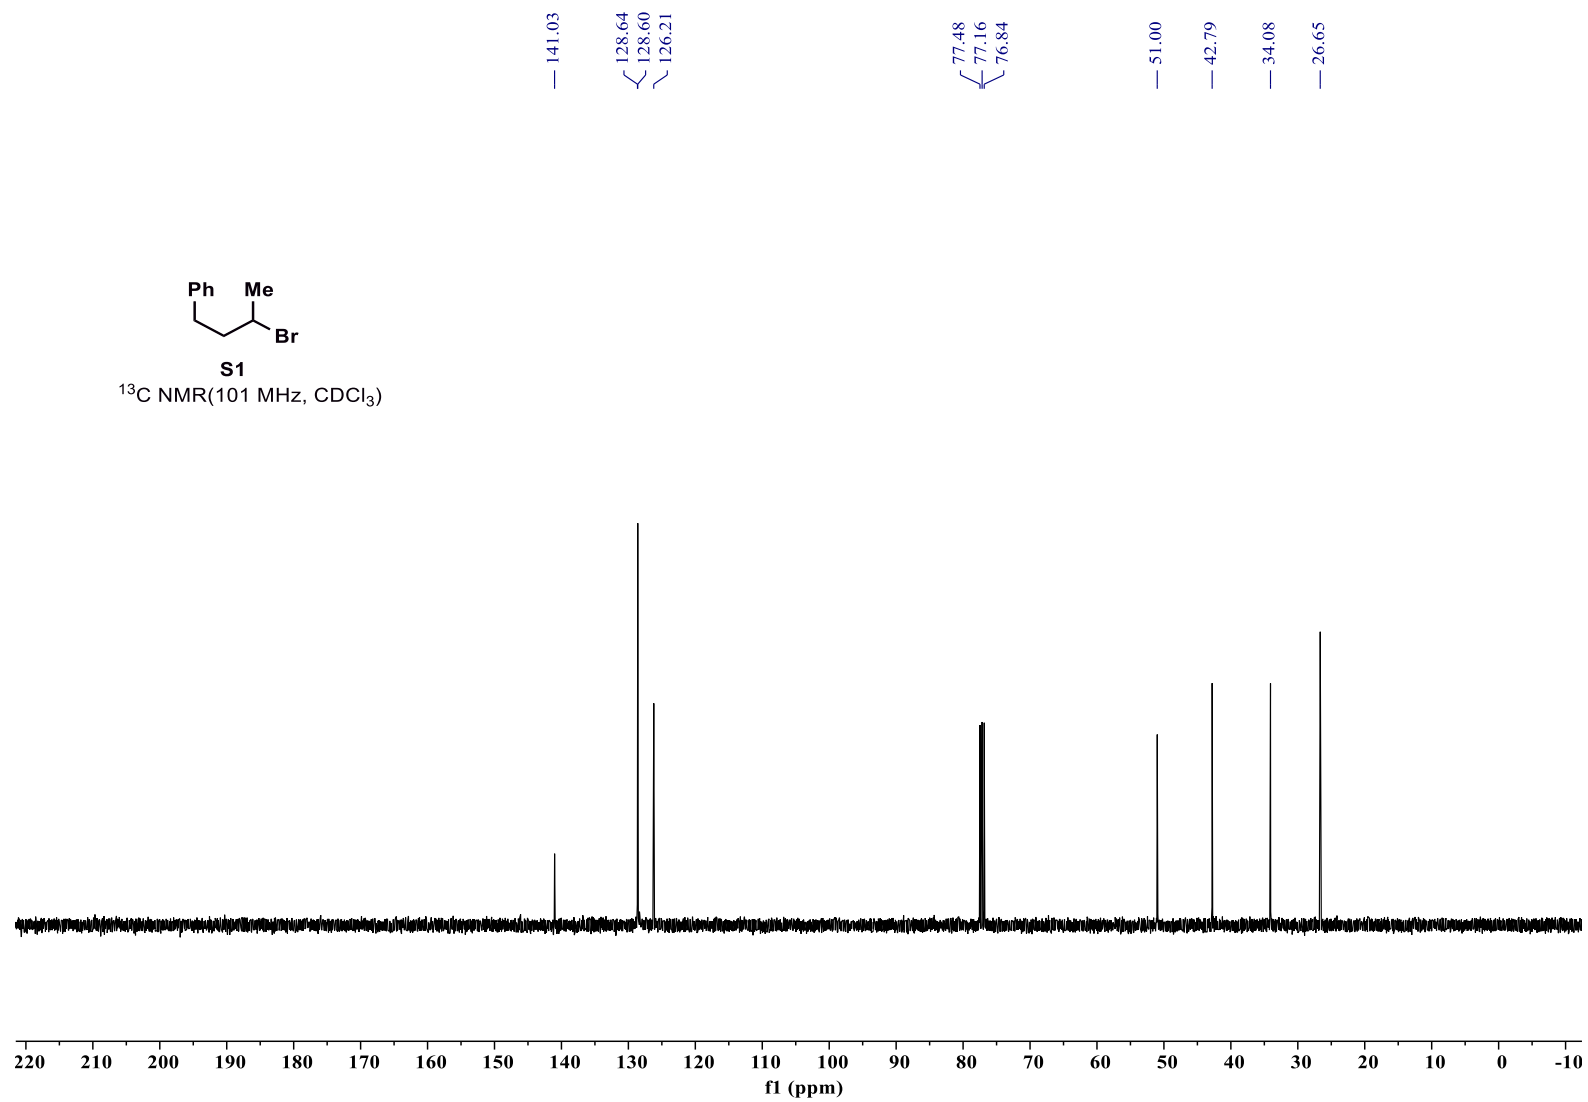

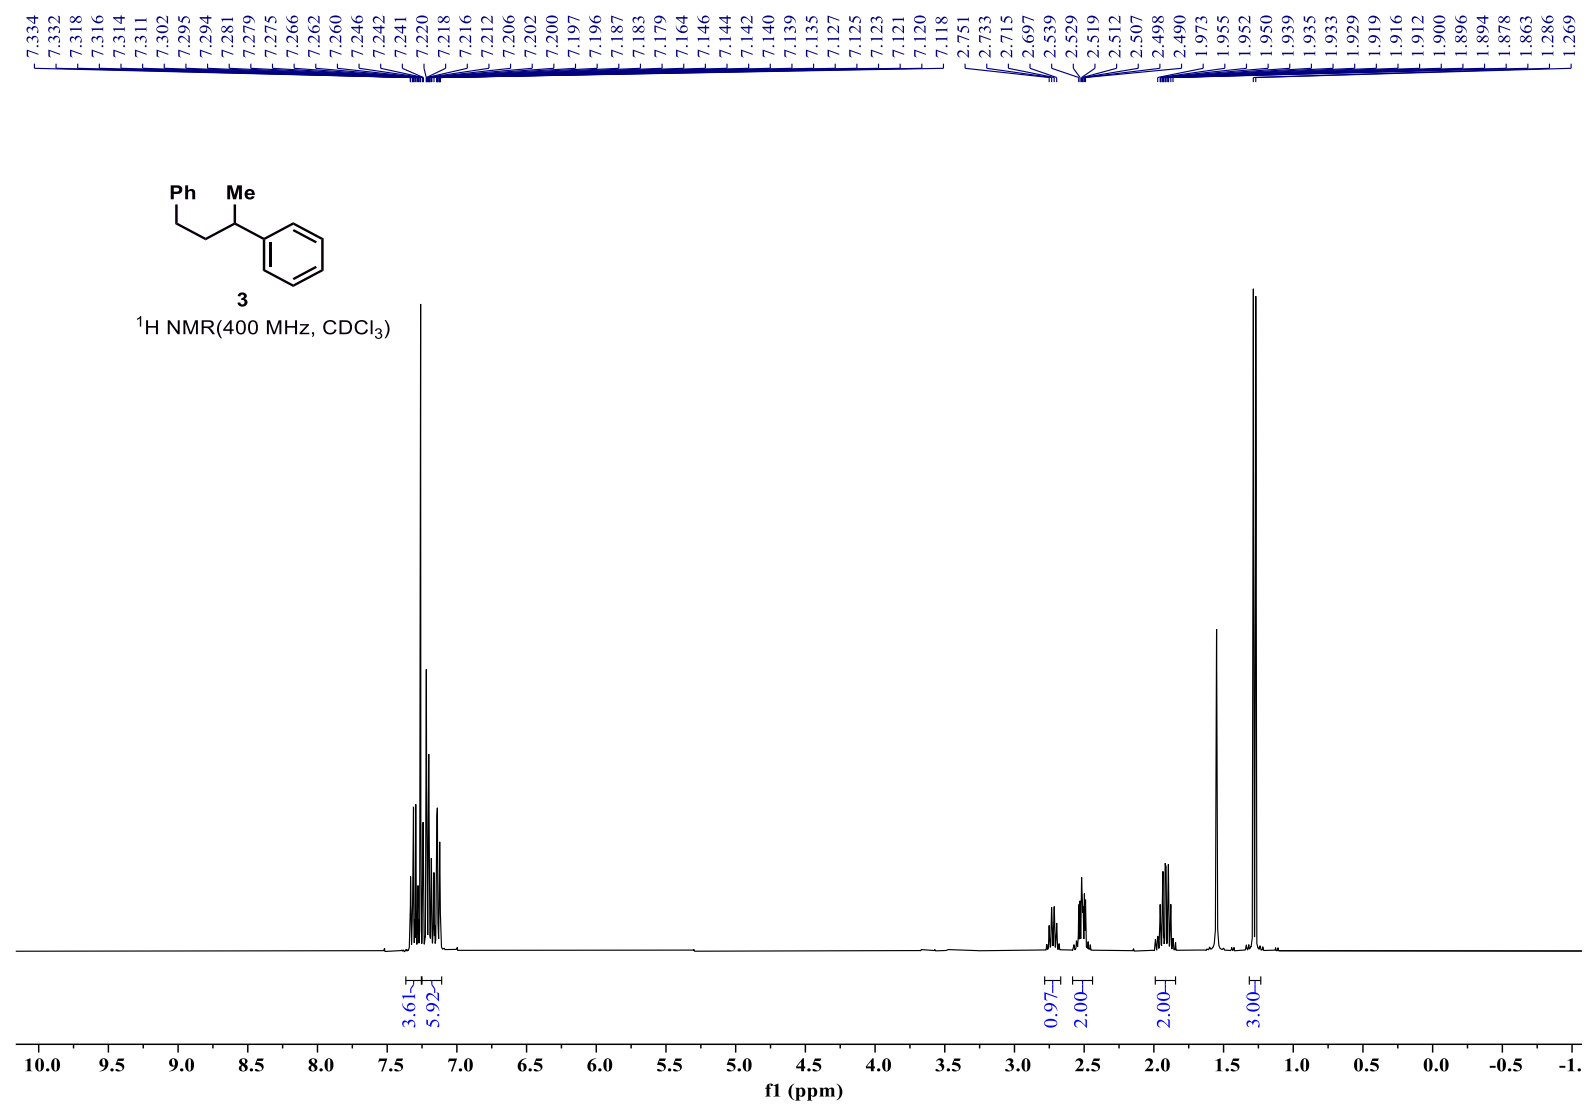

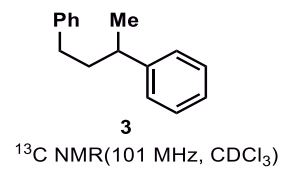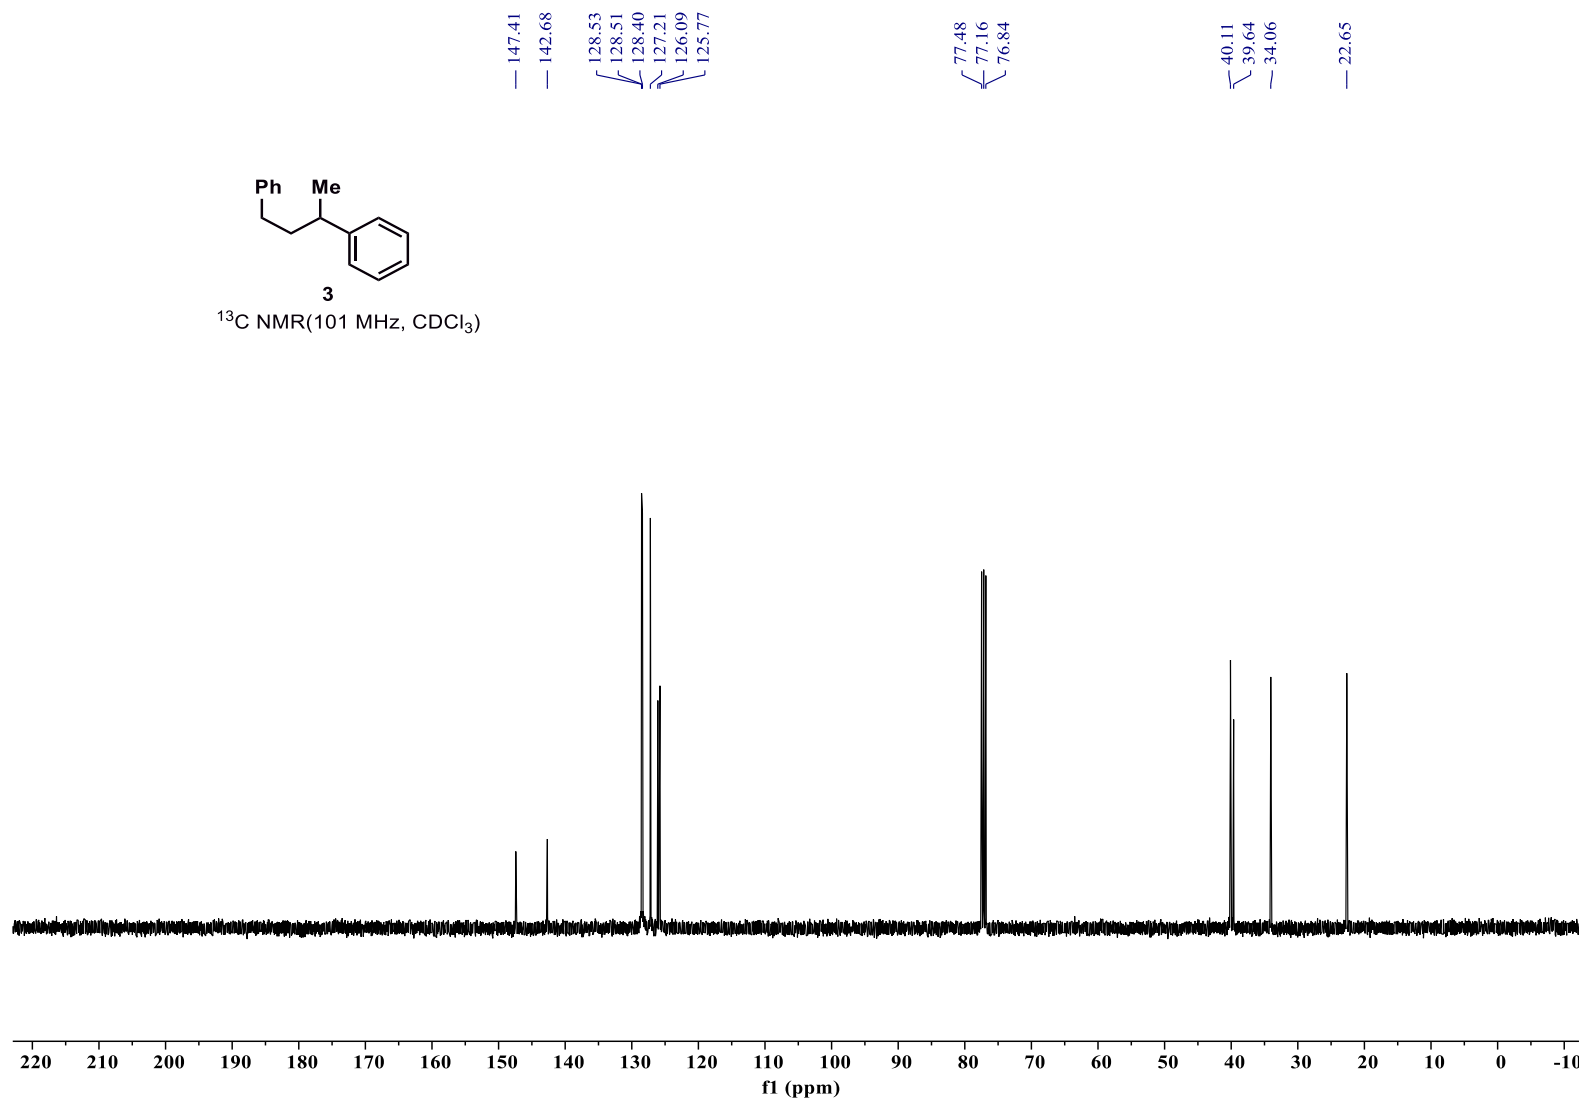

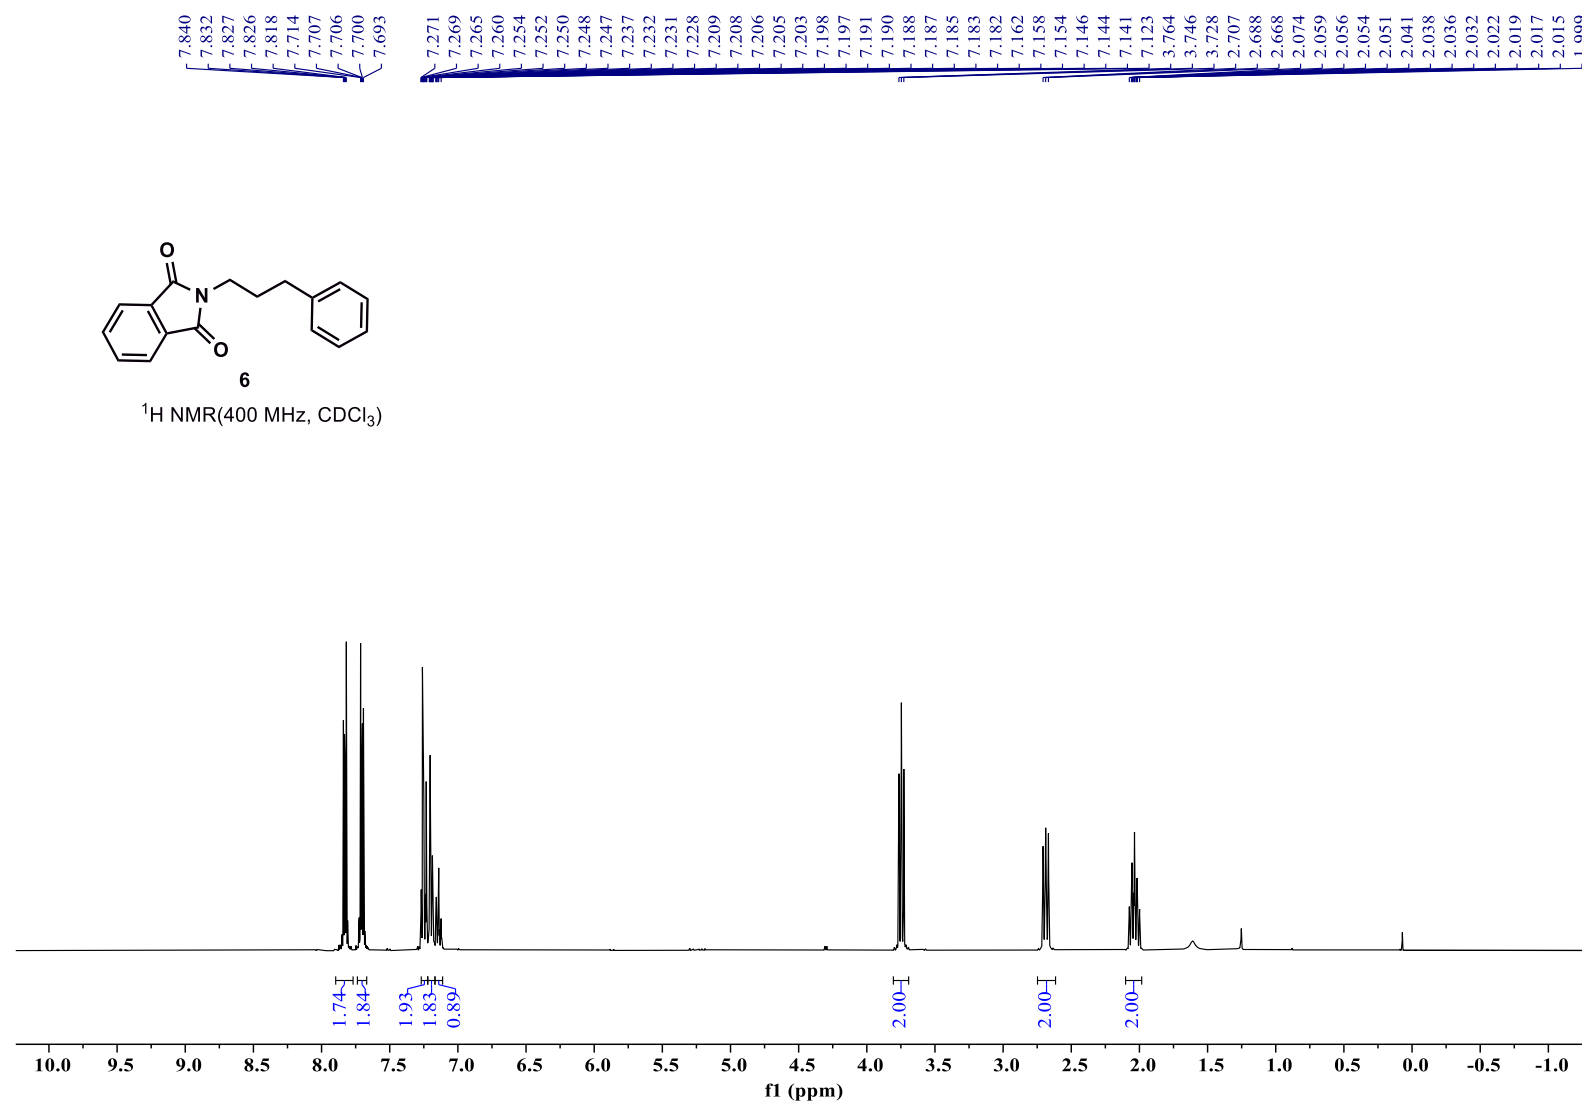

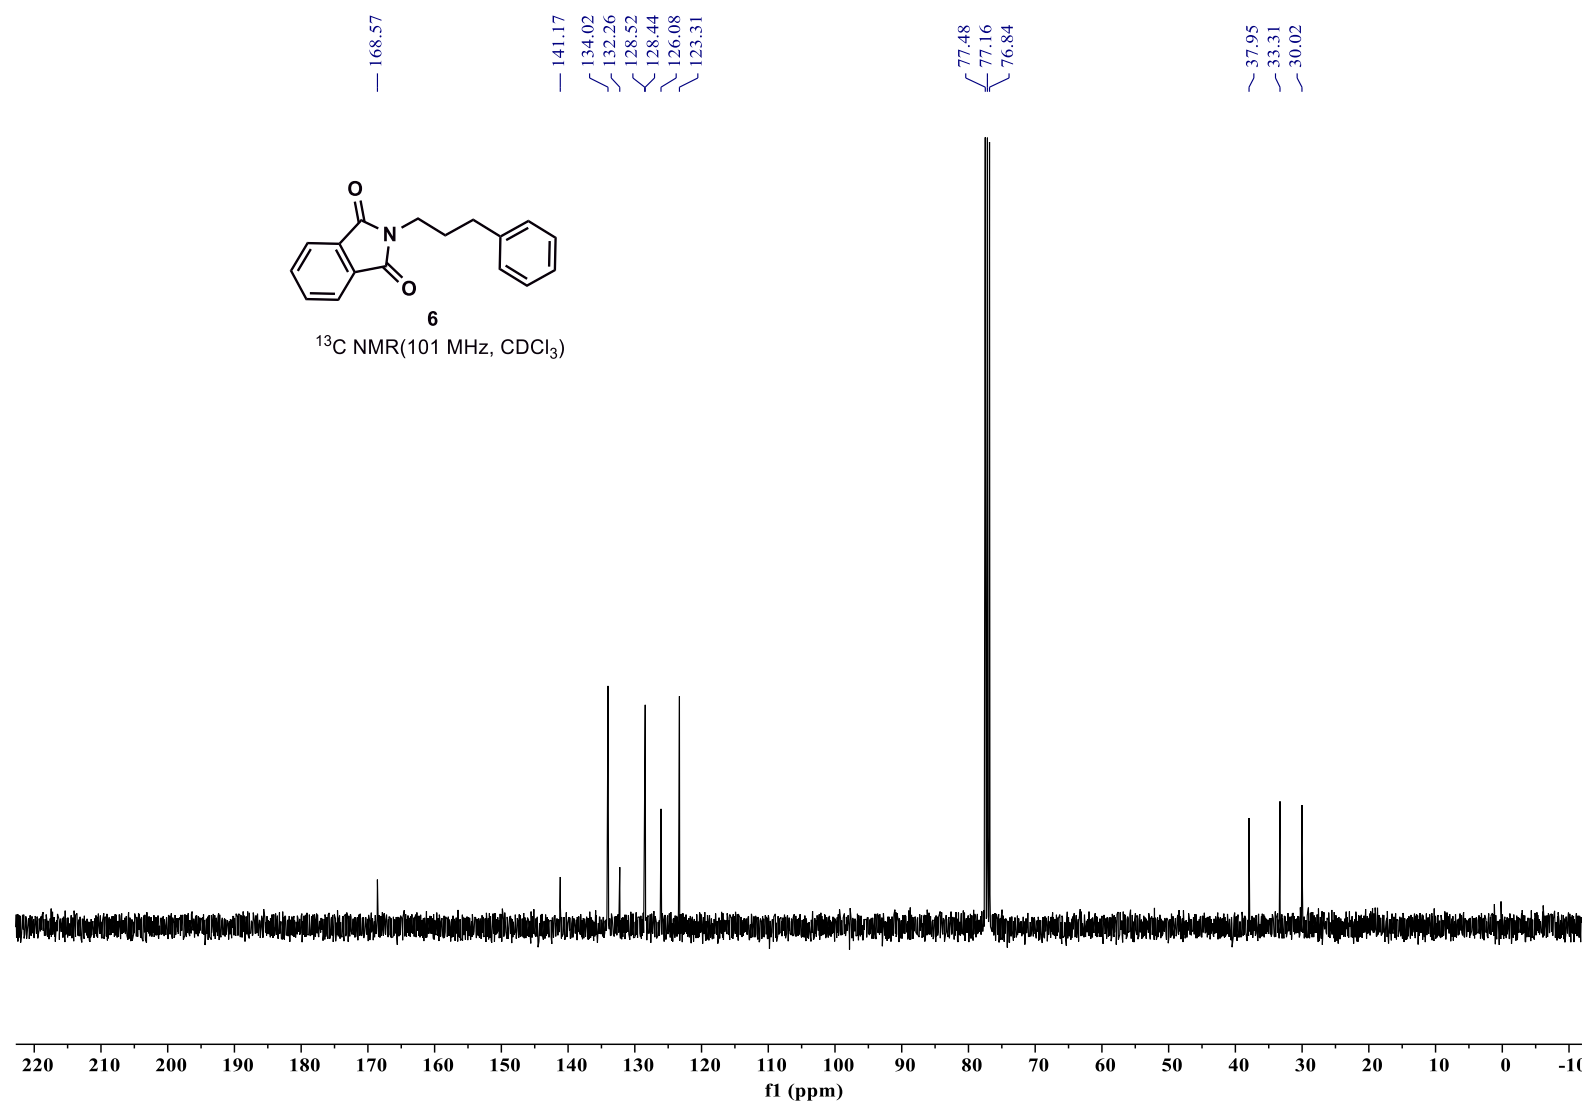

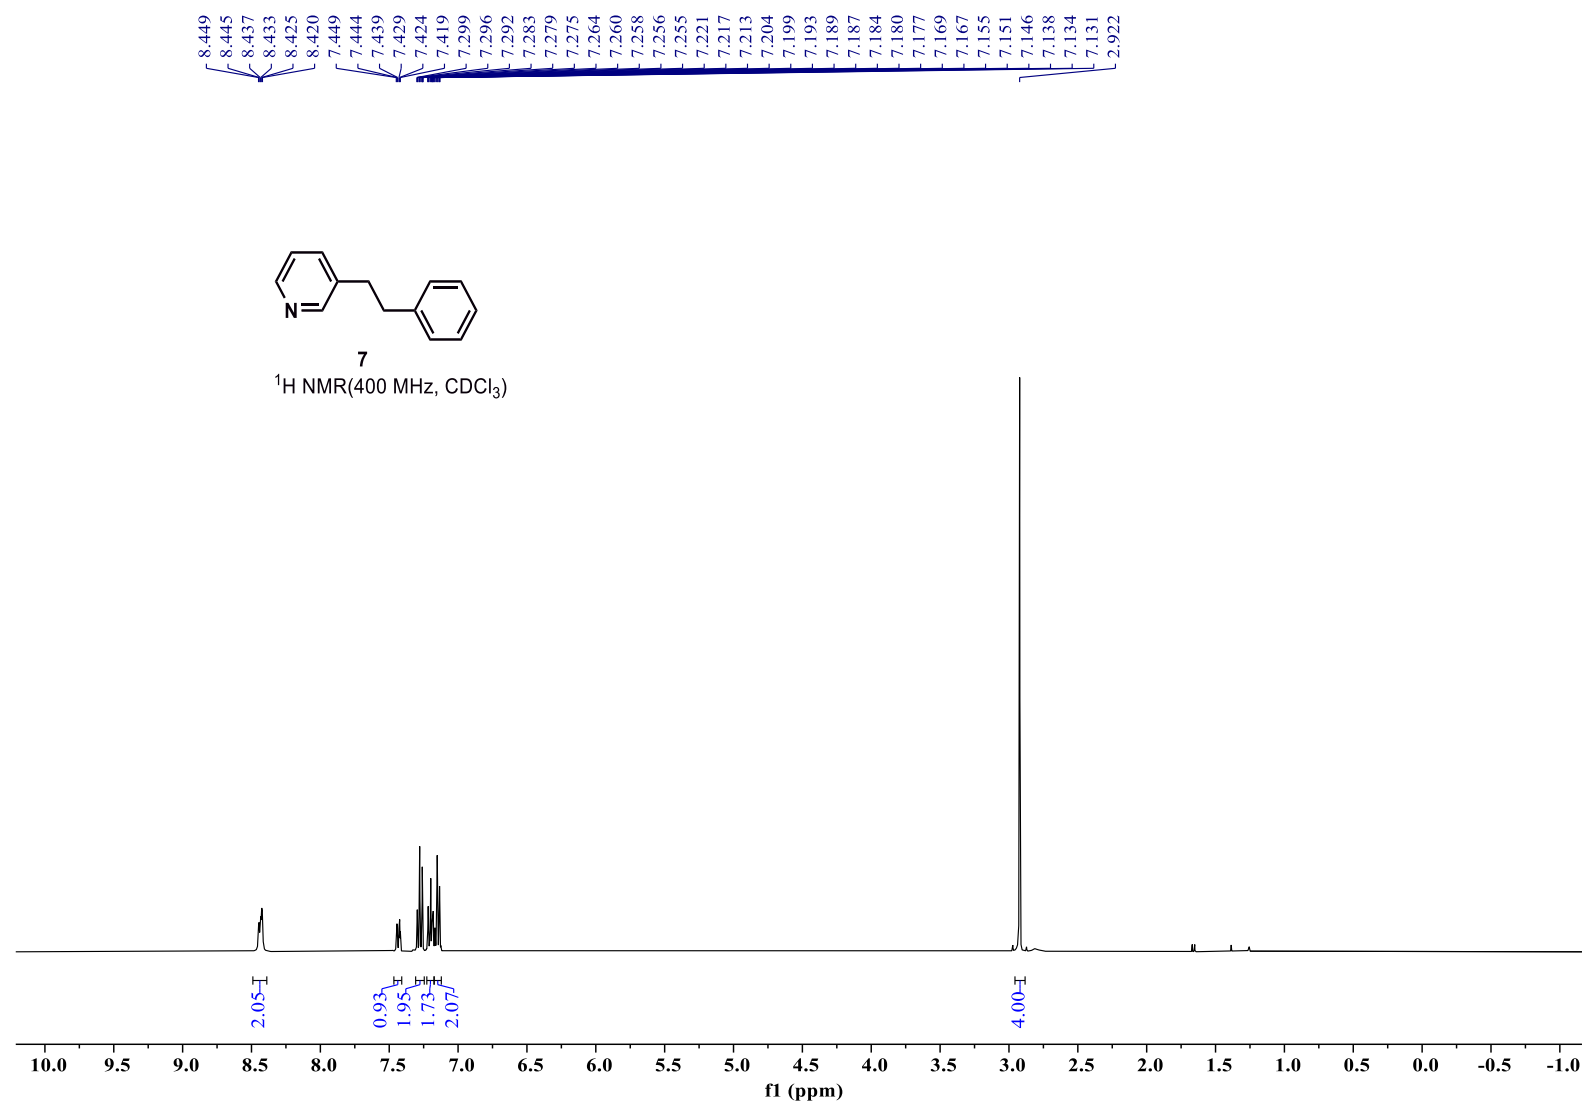

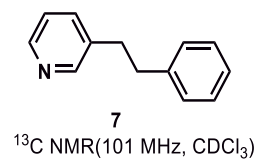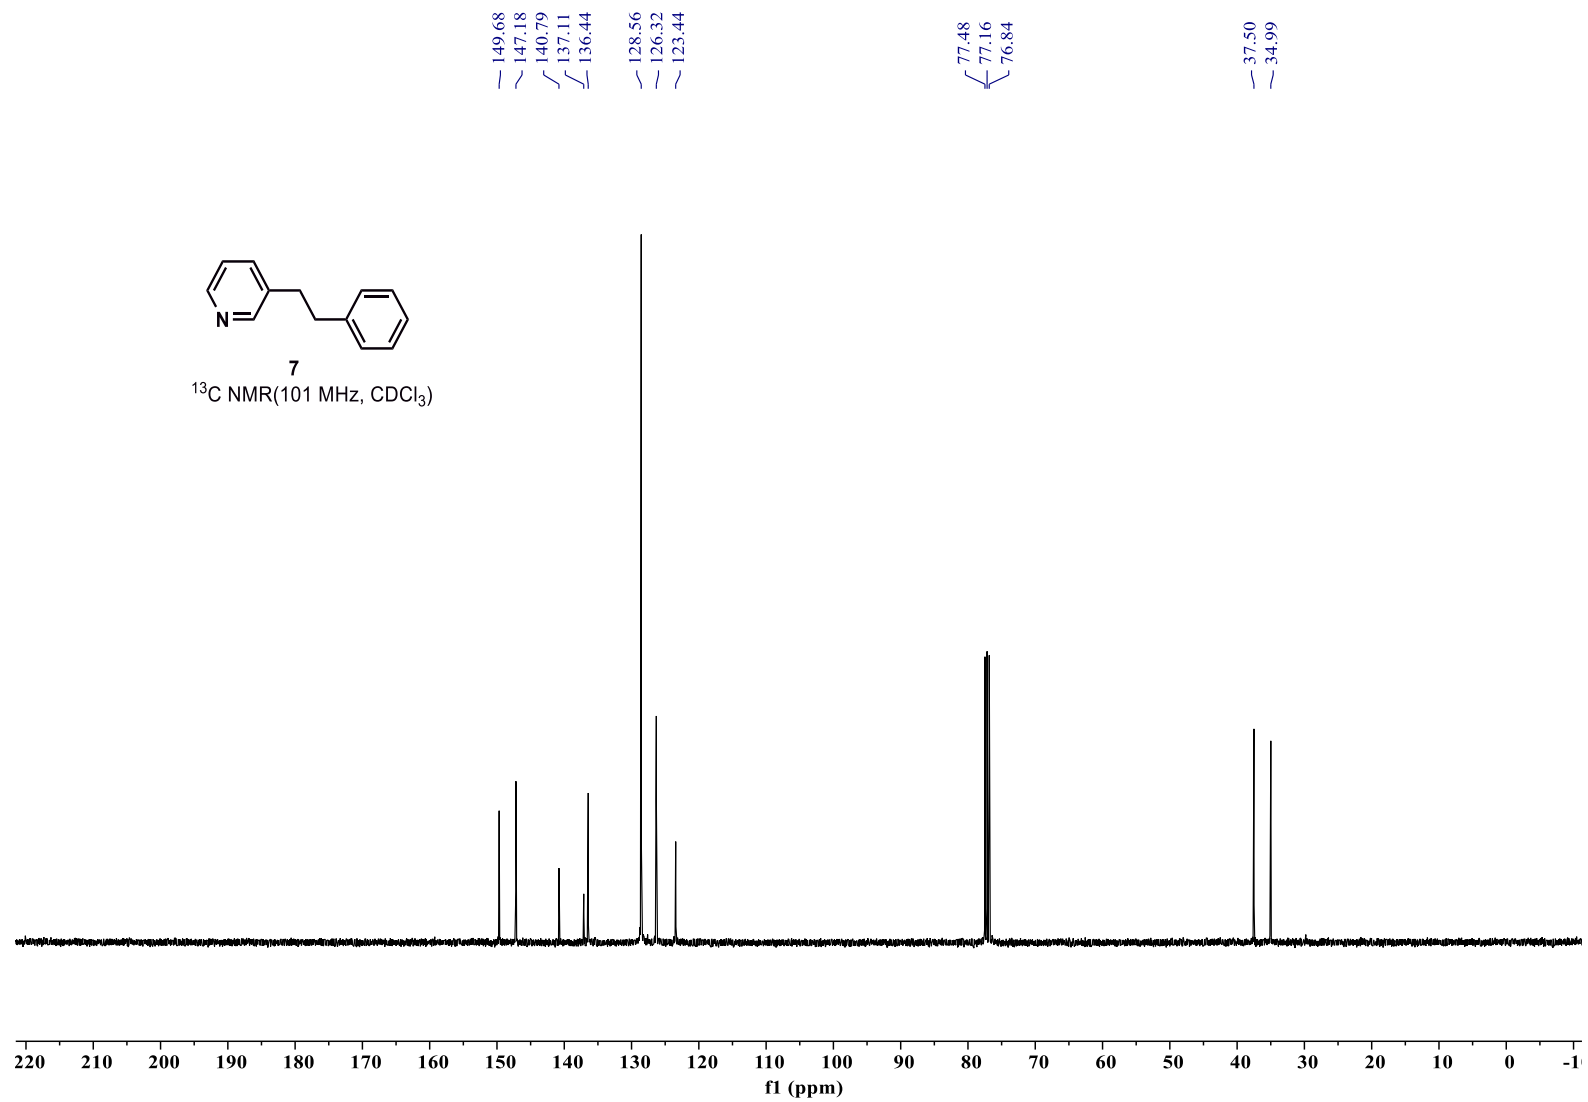

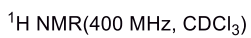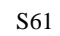

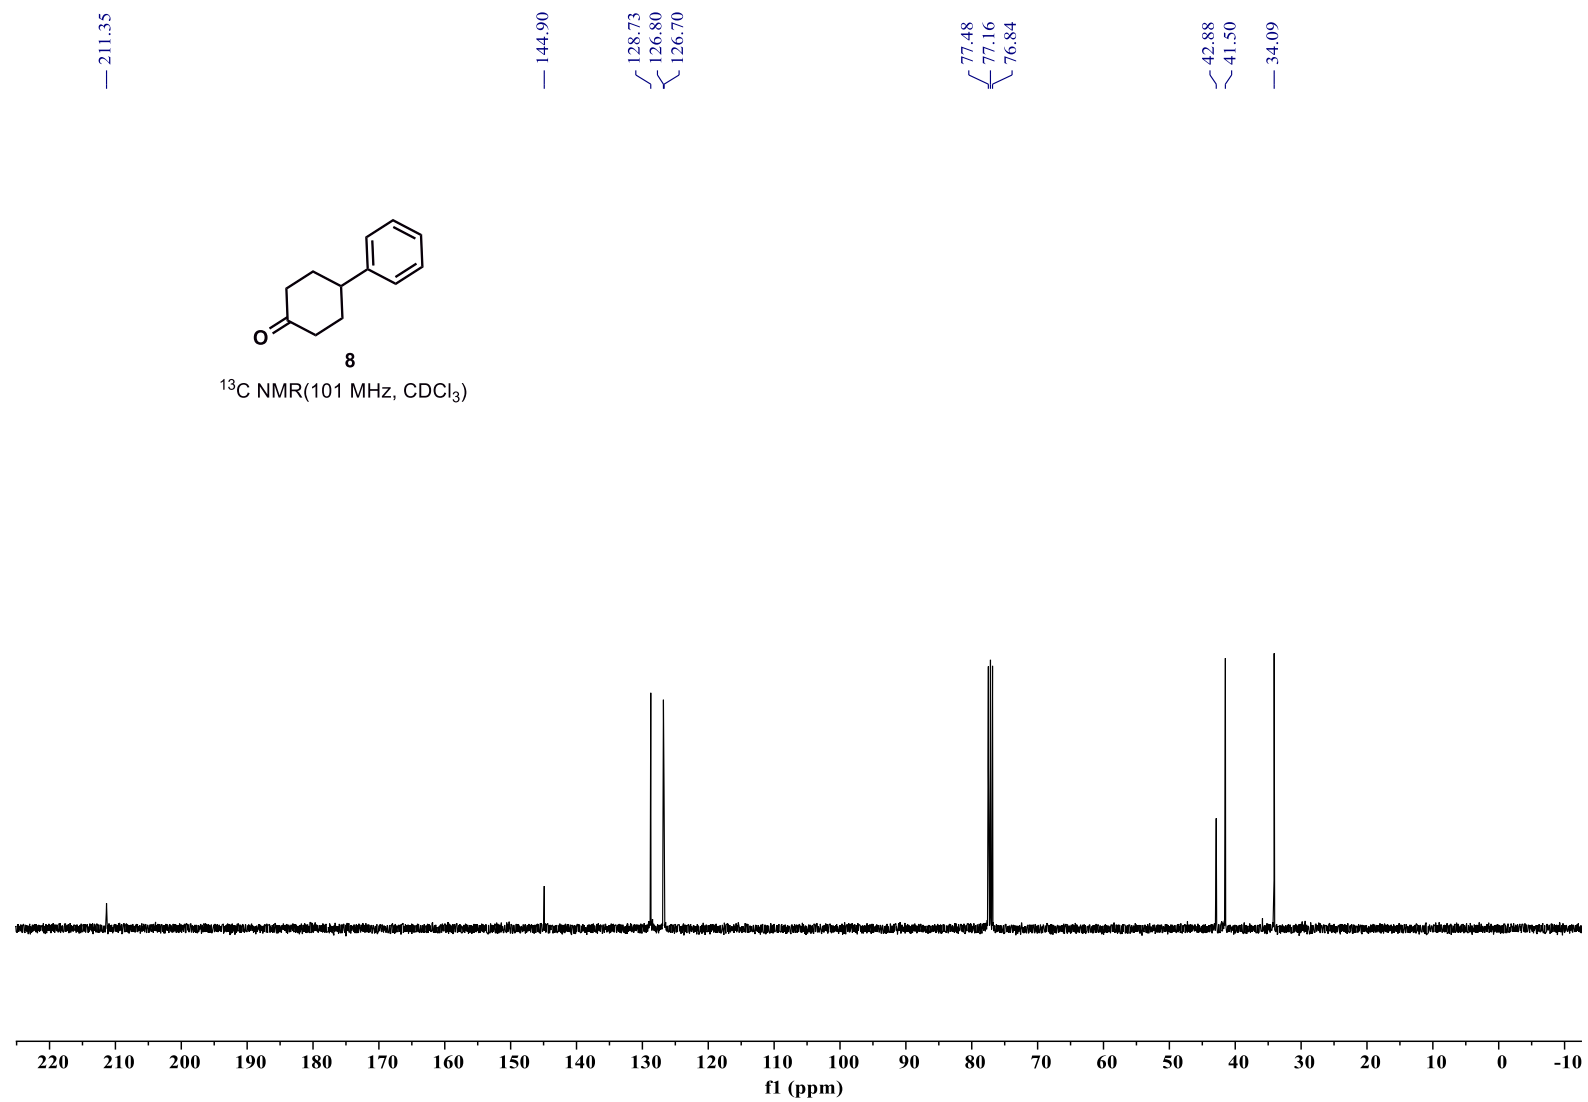

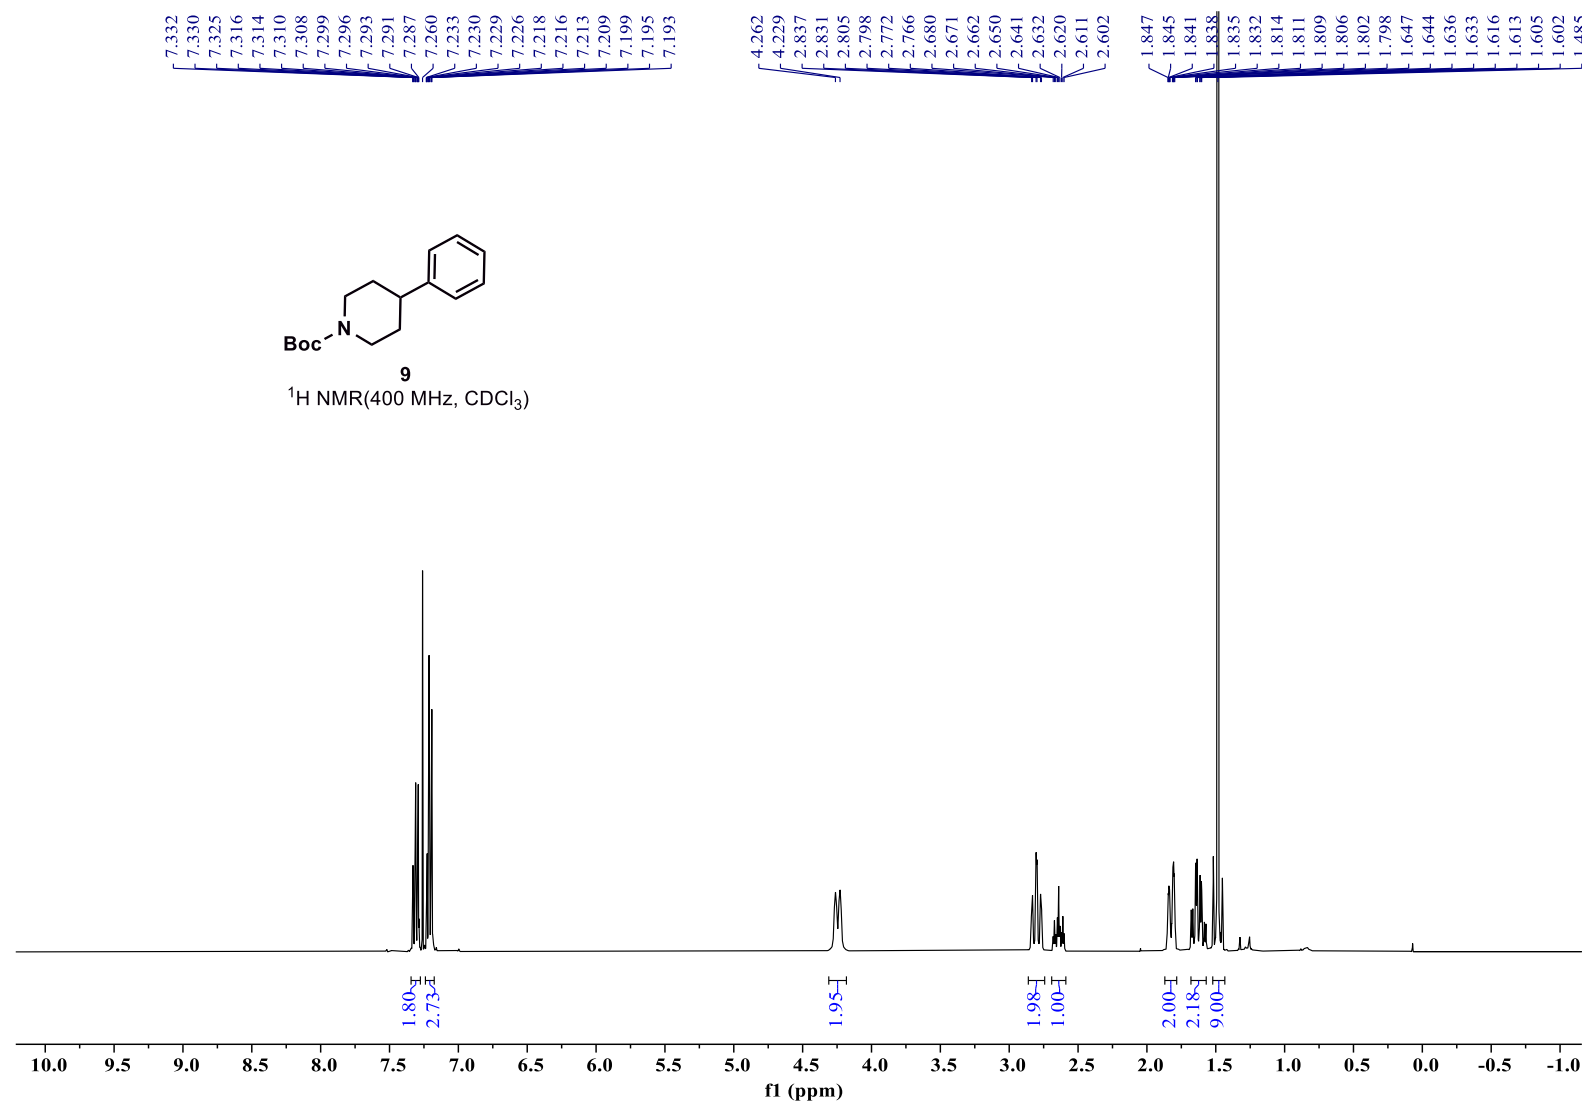

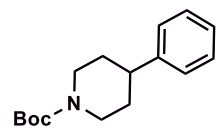

**9**  
 $^{13}\text{C}$  NMR (101 MHz,  $\text{CDCl}_3$ )

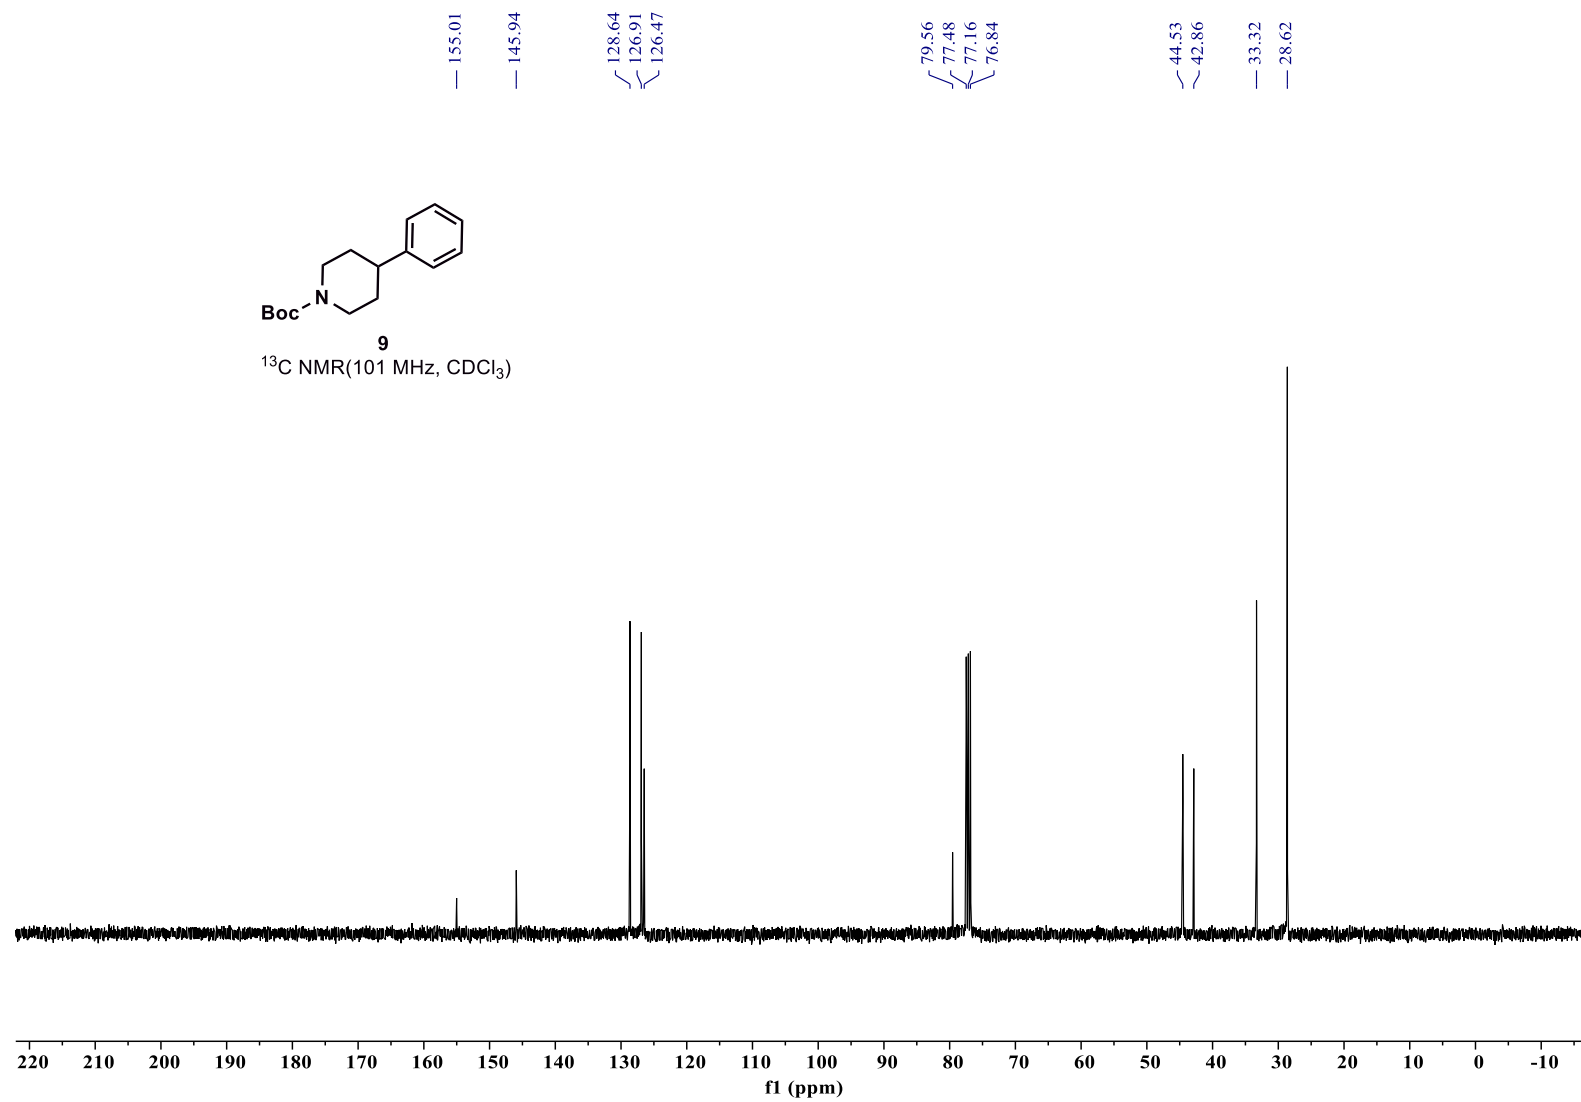

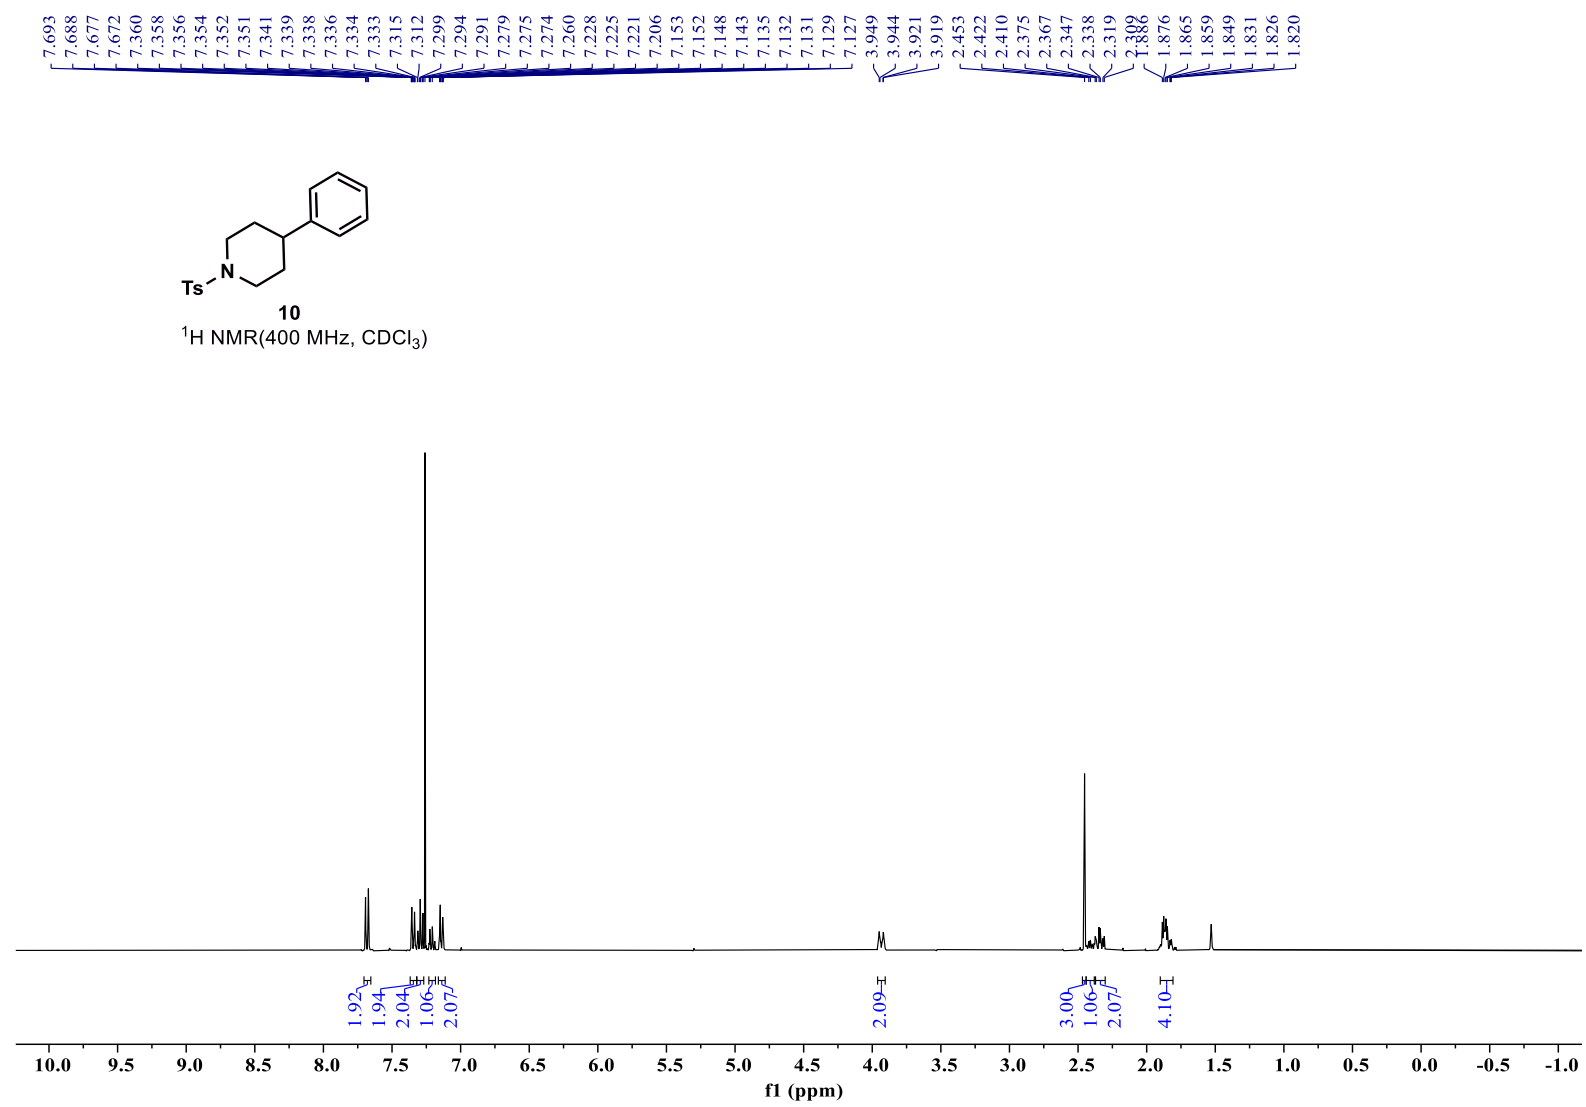

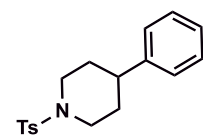

**10**  
<sup>13</sup>C NMR(101 MHz, CDCl<sub>3</sub>)

145.04  
 143.62  
 133.23  
 129.76  
 128.72  
 127.91  
 126.81  
 126.72

77.48  
 77.16  
 76.84

47.00  
 41.97

32.67

21.68

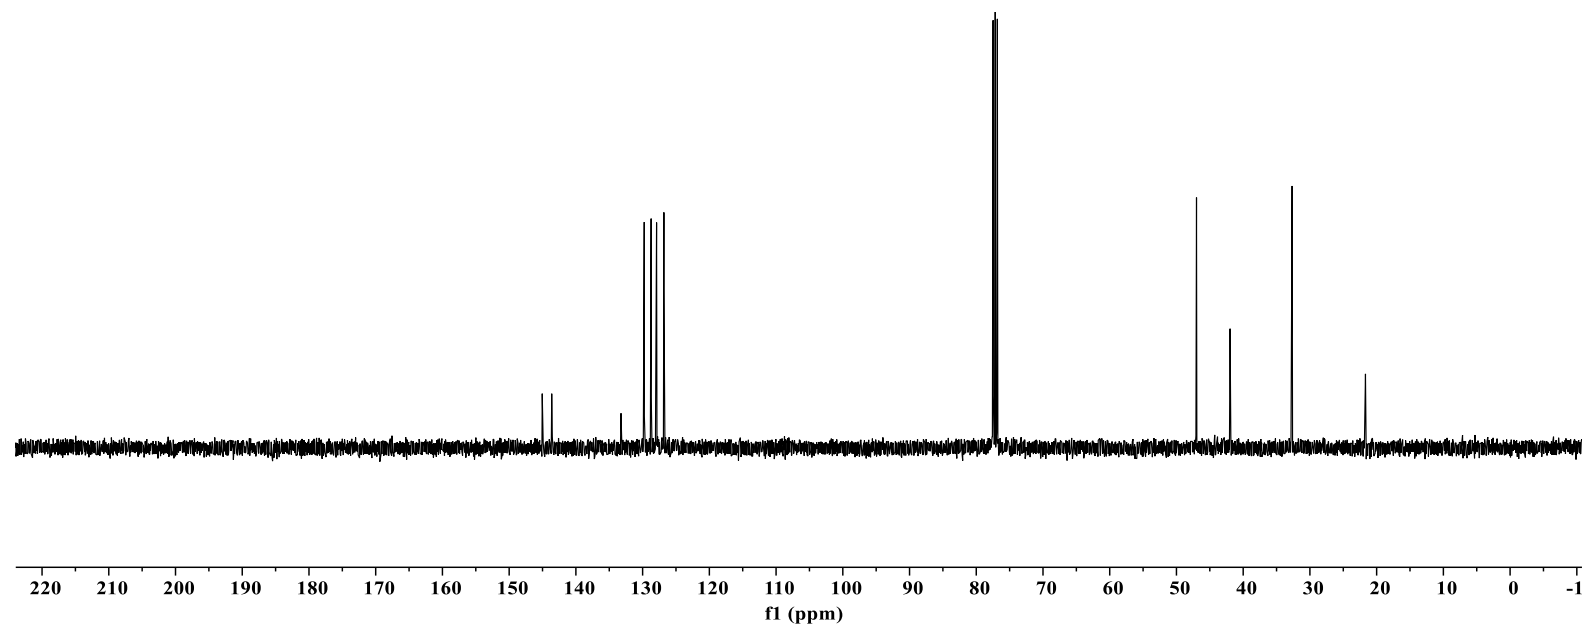

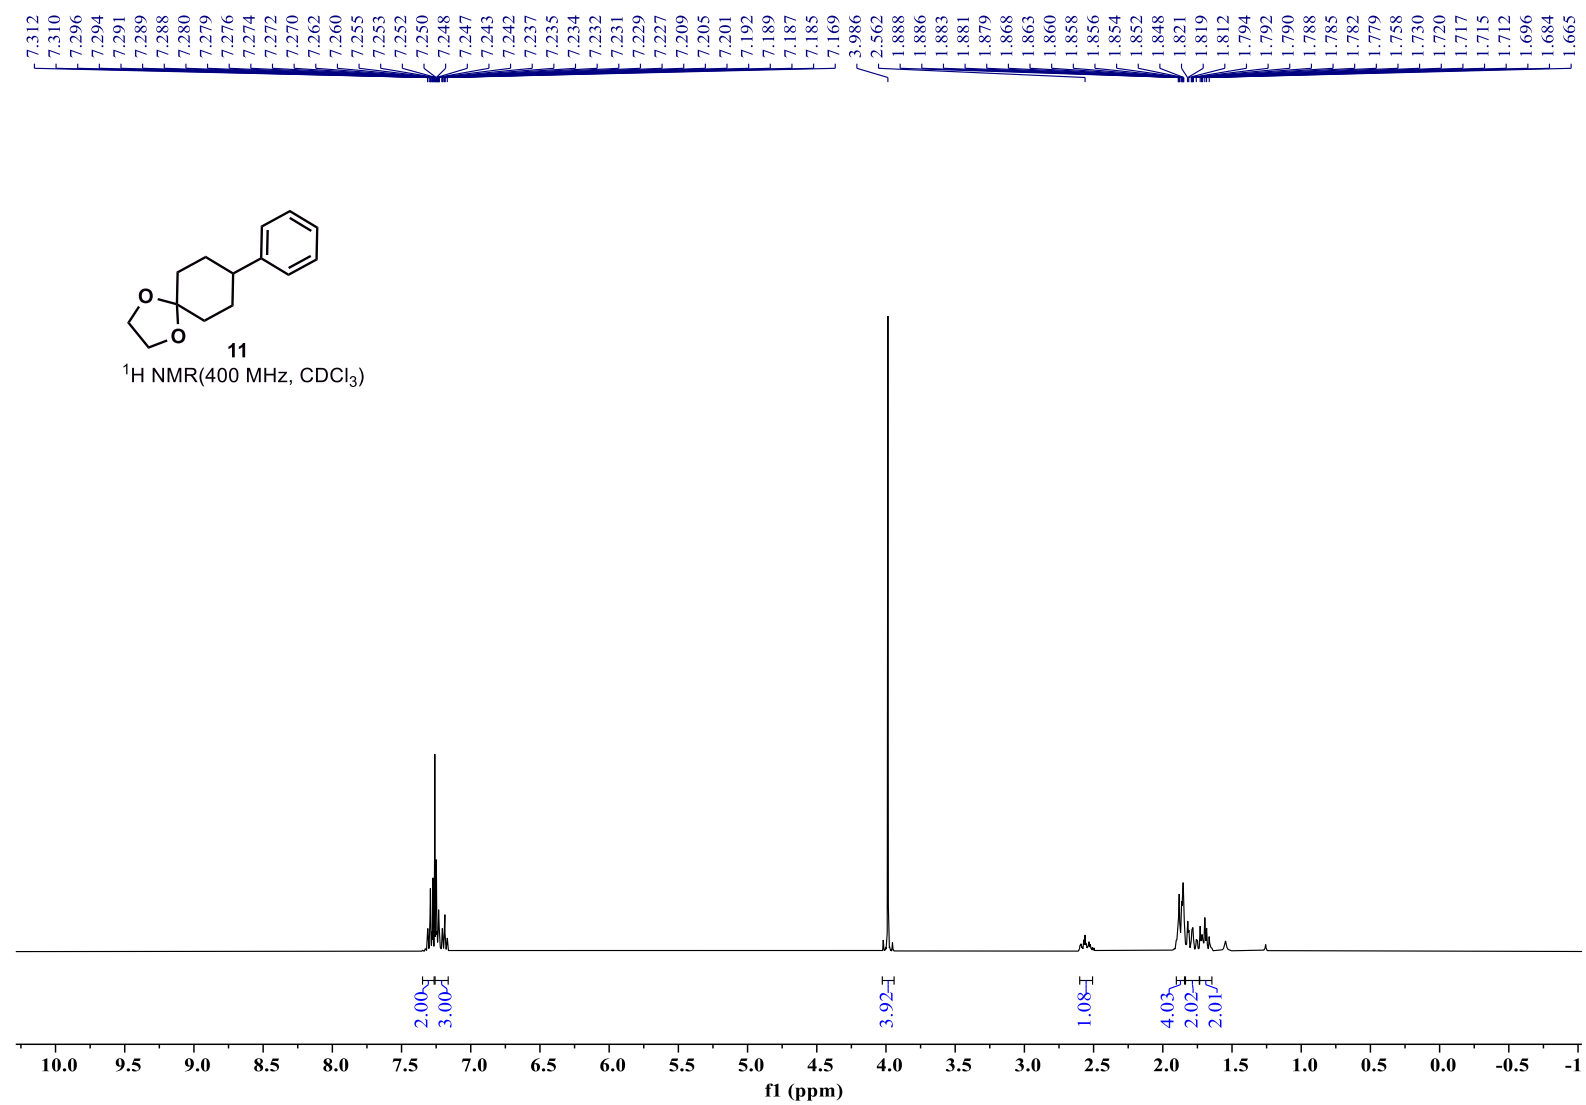

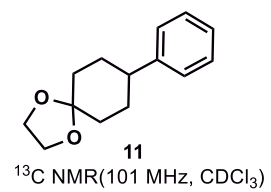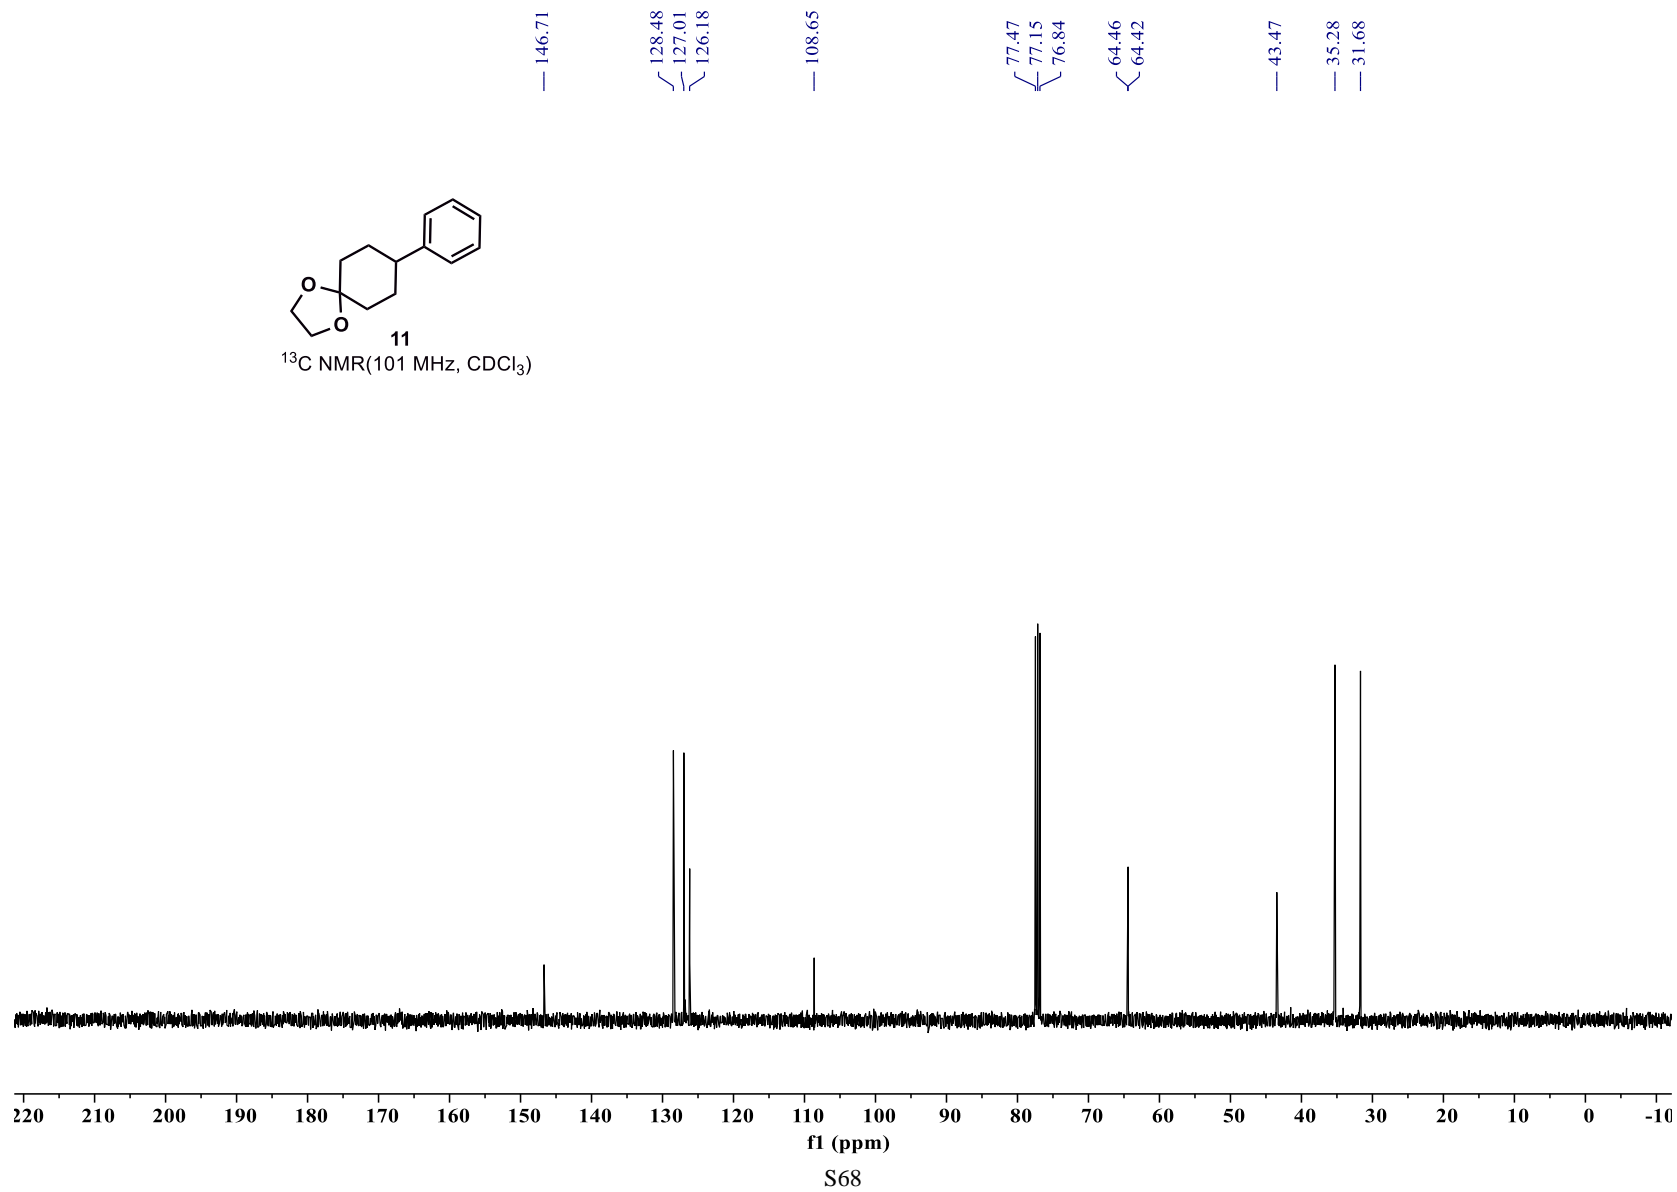

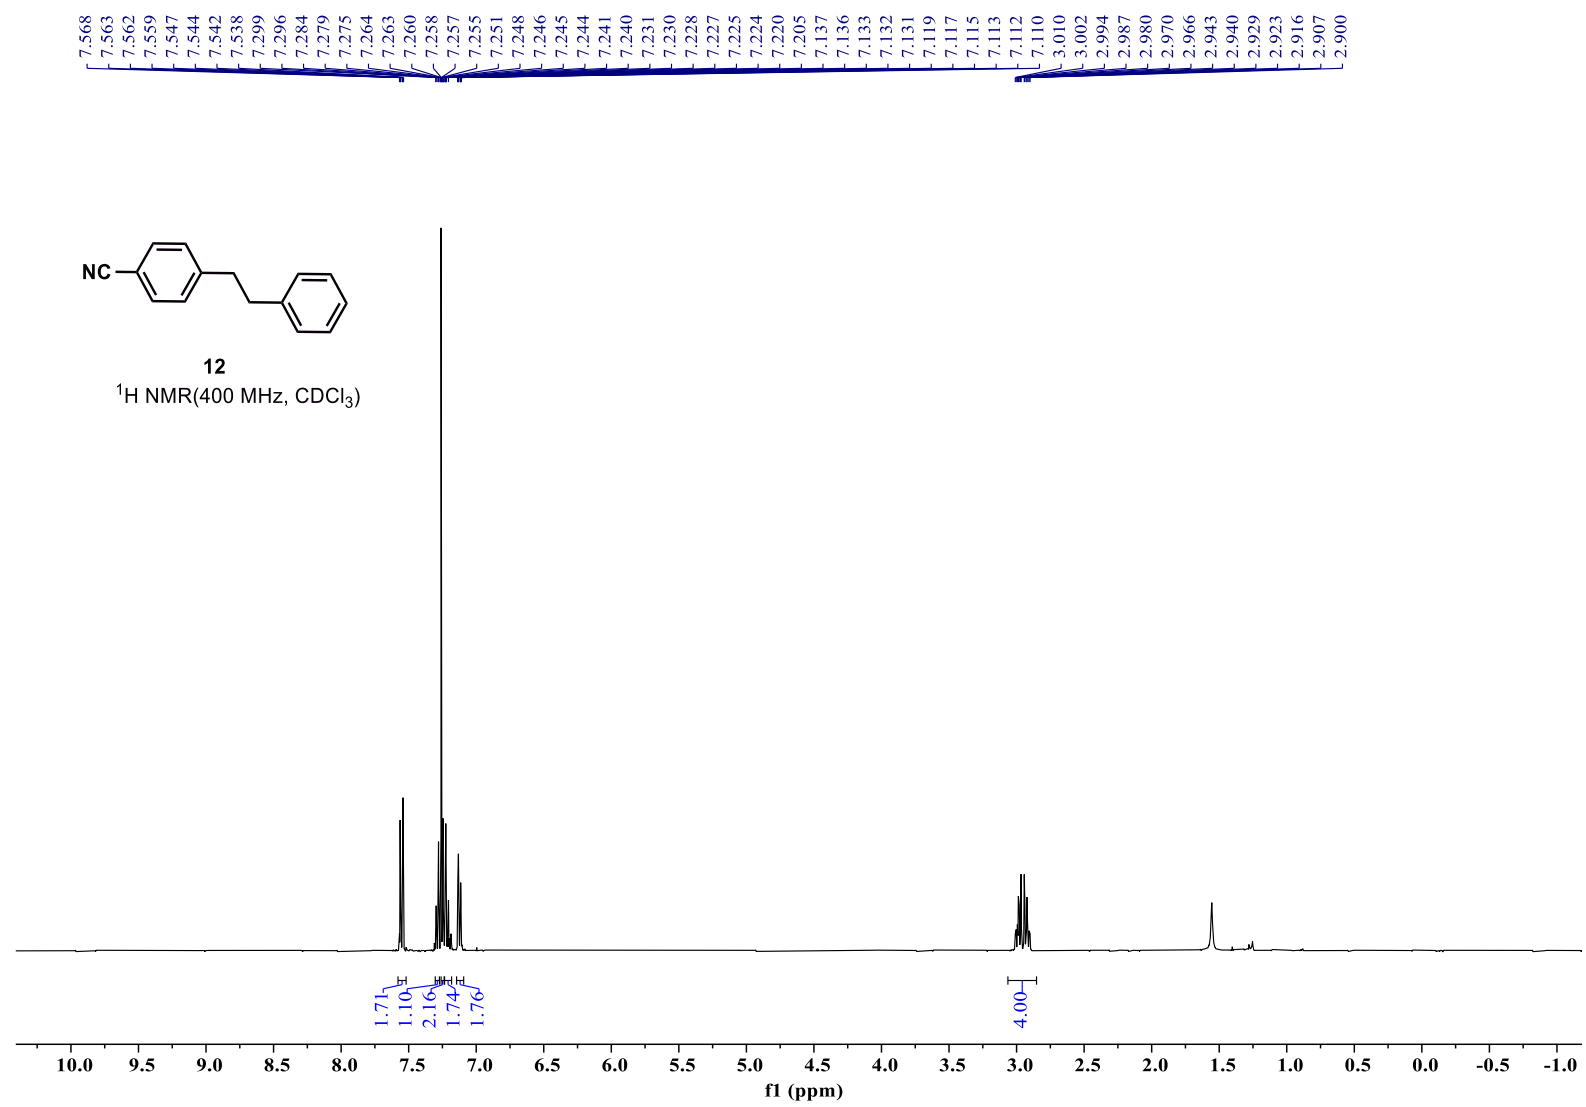

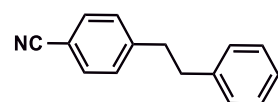

**12**

$^{13}\text{C}$  NMR(101 MHz,  $\text{CDCl}_3$ )

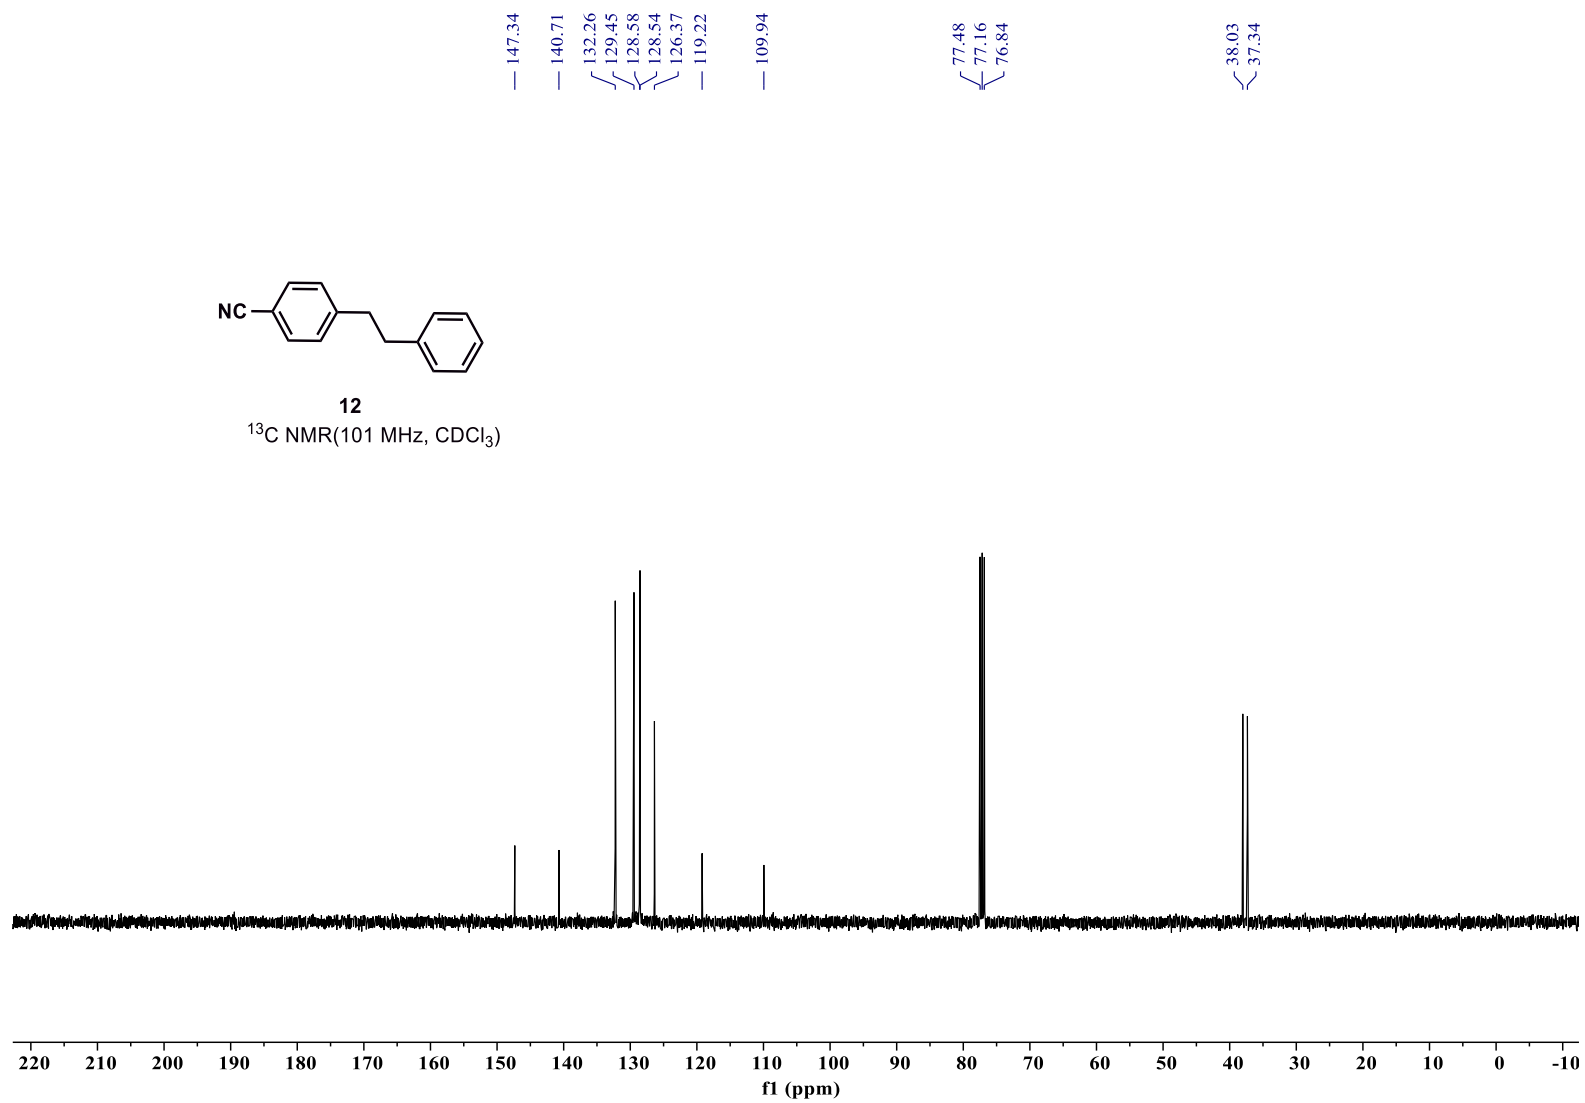

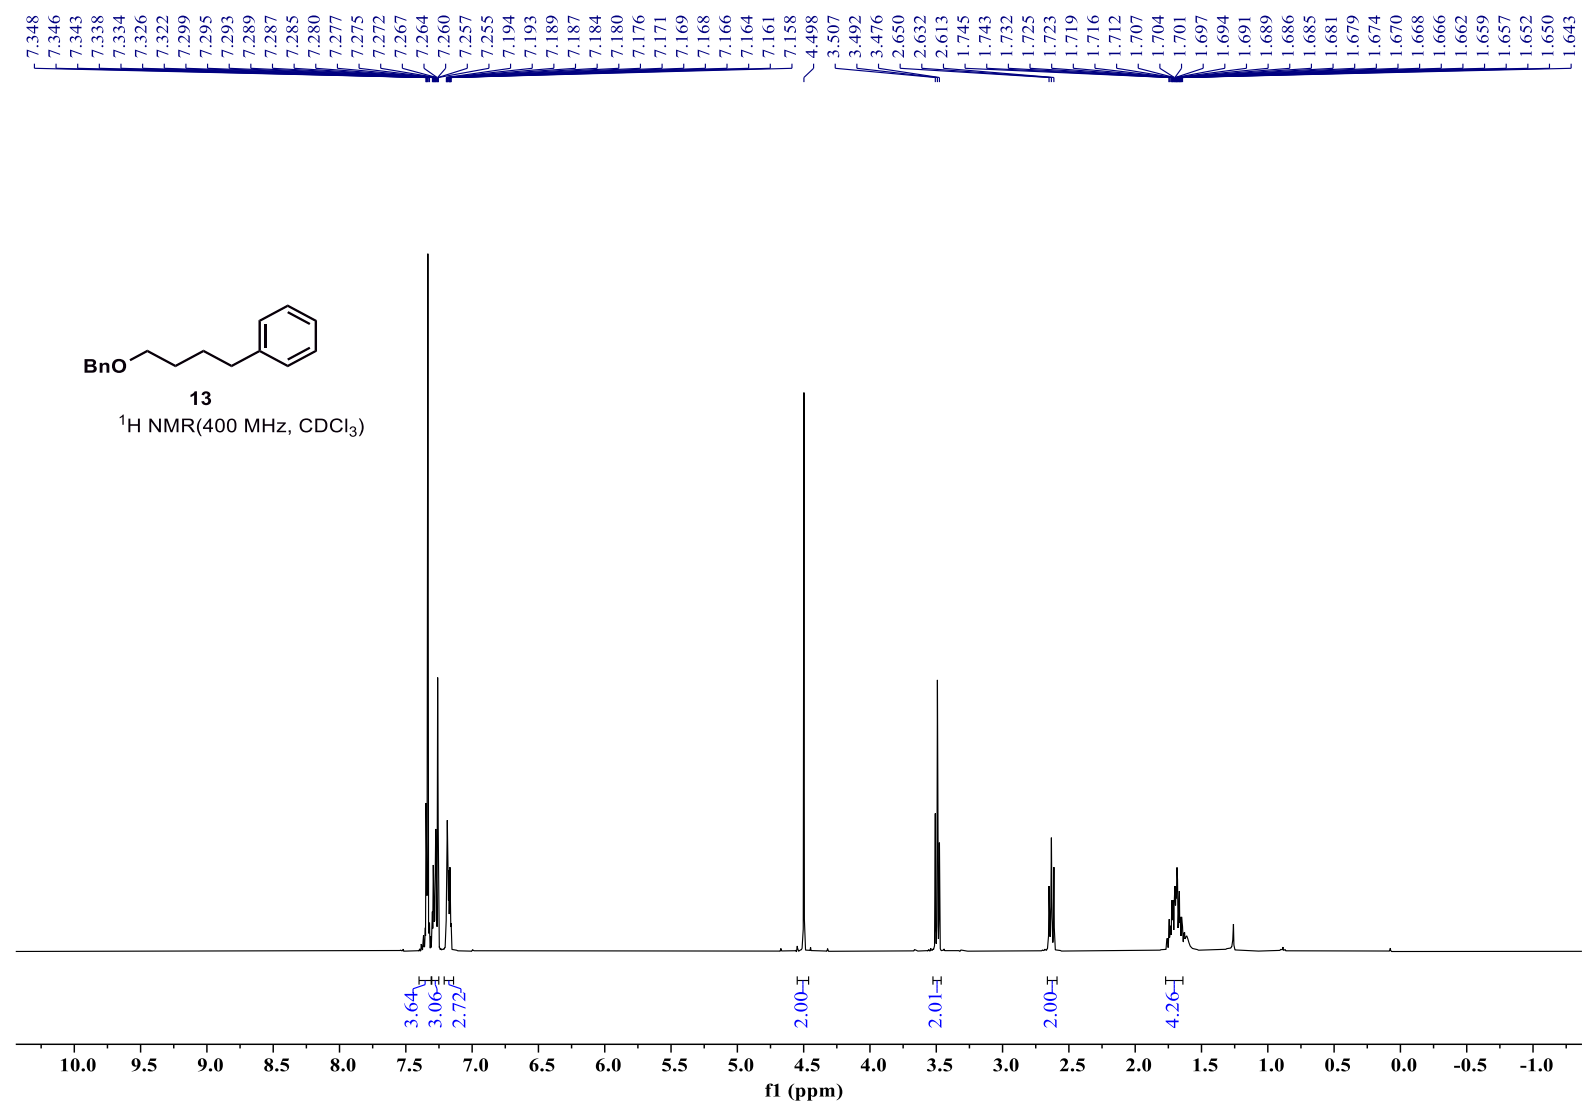

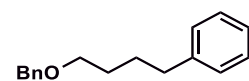

**13**

<sup>13</sup>C NMR(101 MHz, CDCl<sub>3</sub>)

— 142.62  
— 138.76  
128.51  
128.41  
127.79  
127.66  
125.83

77.48  
77.16  
76.84  
73.05  
70.36

35.88  
29.56  
28.23

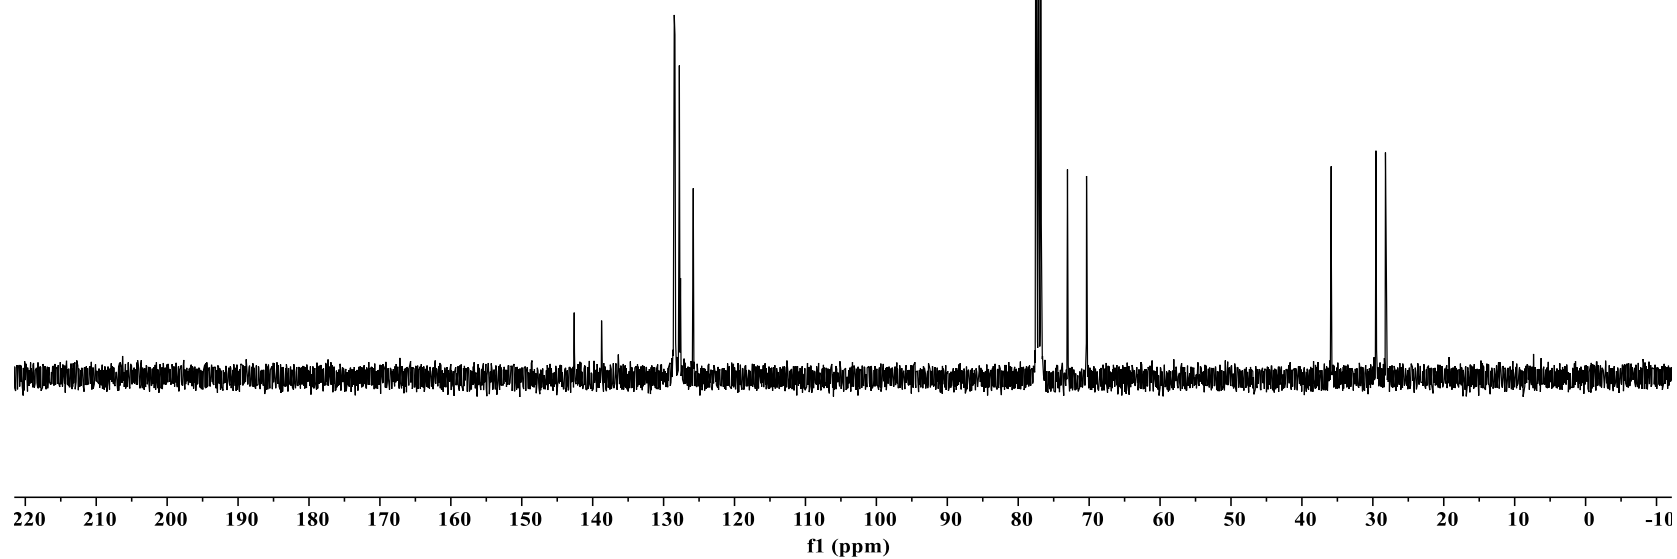

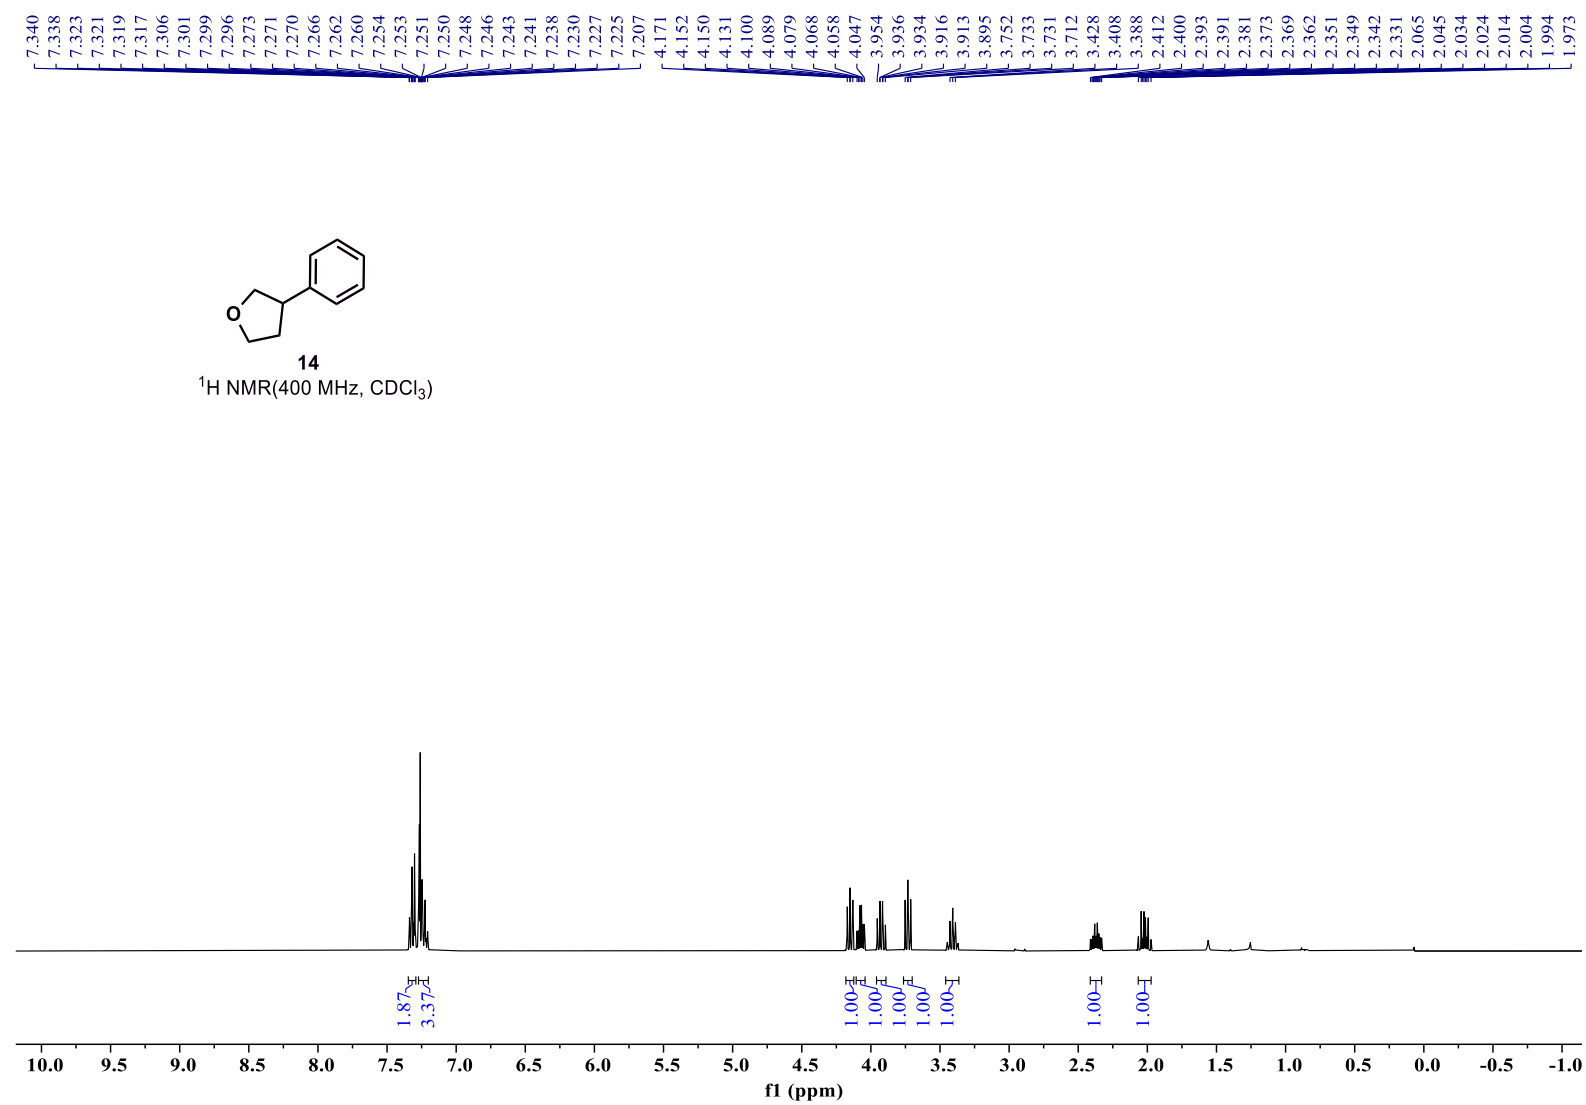

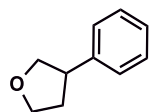

**14**

$^{13}\text{C}$  NMR(101 MHz,  $\text{CDCl}_3$ )

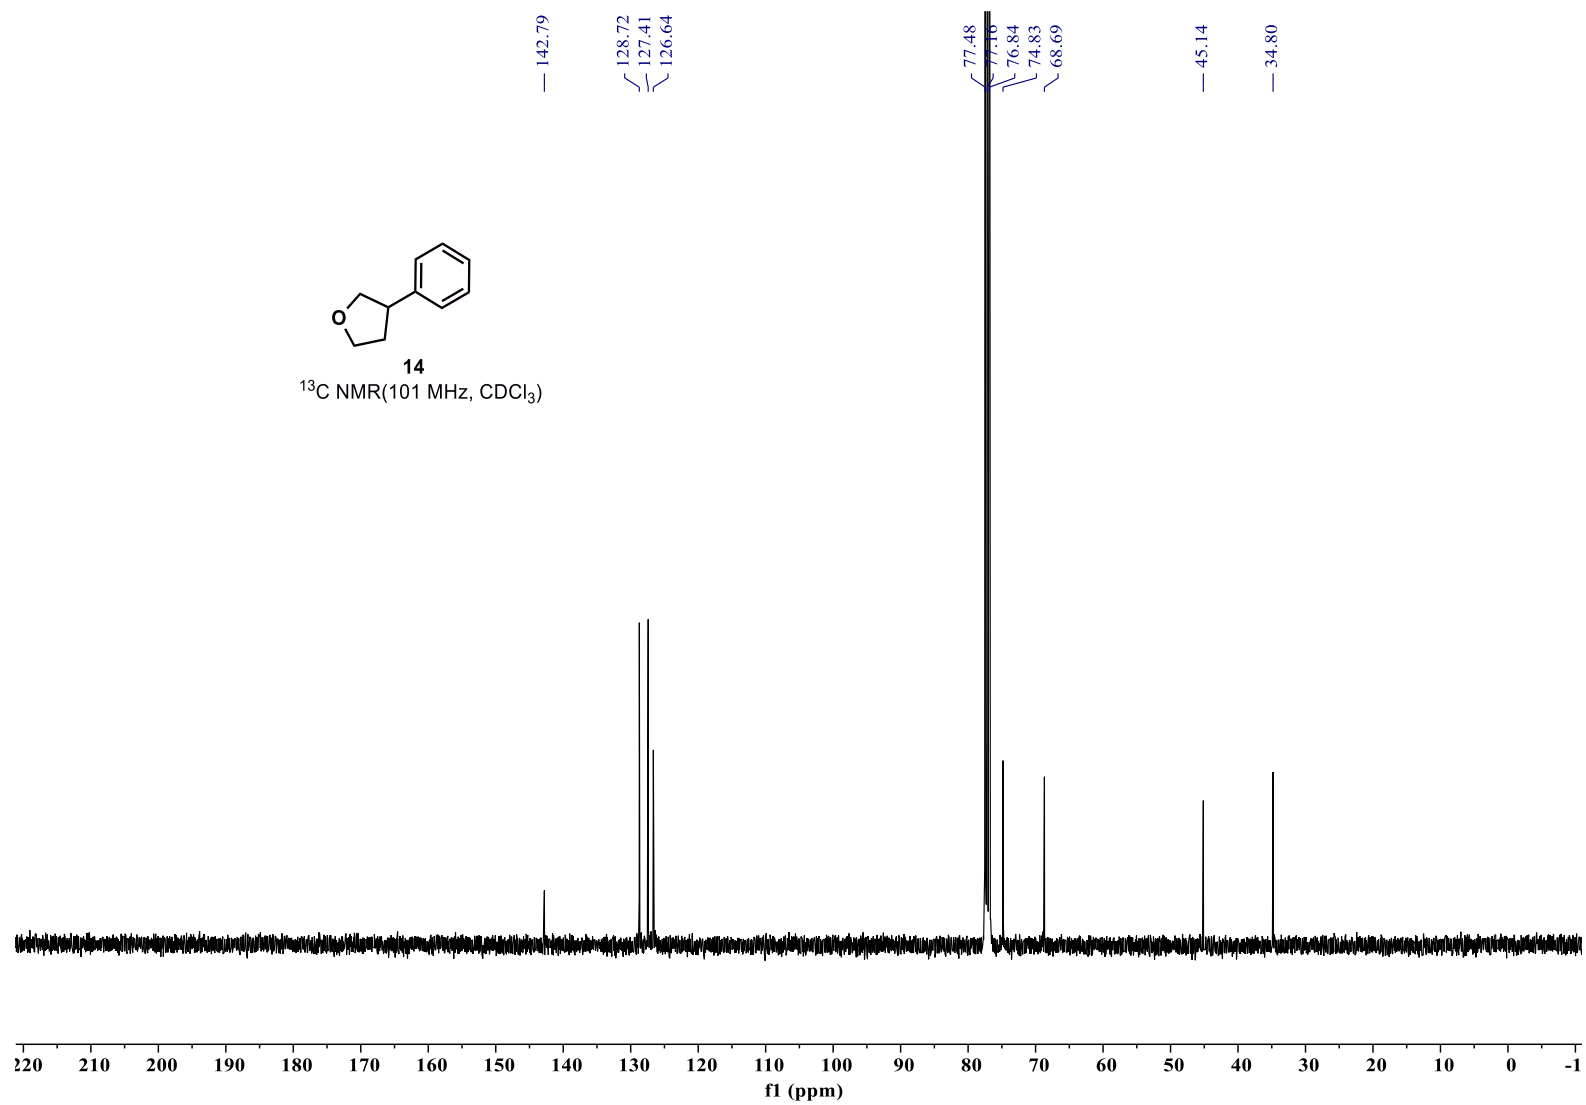

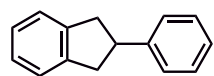

**15**

<sup>1</sup>H NMR(400 MHz, CDCl<sub>3</sub>)

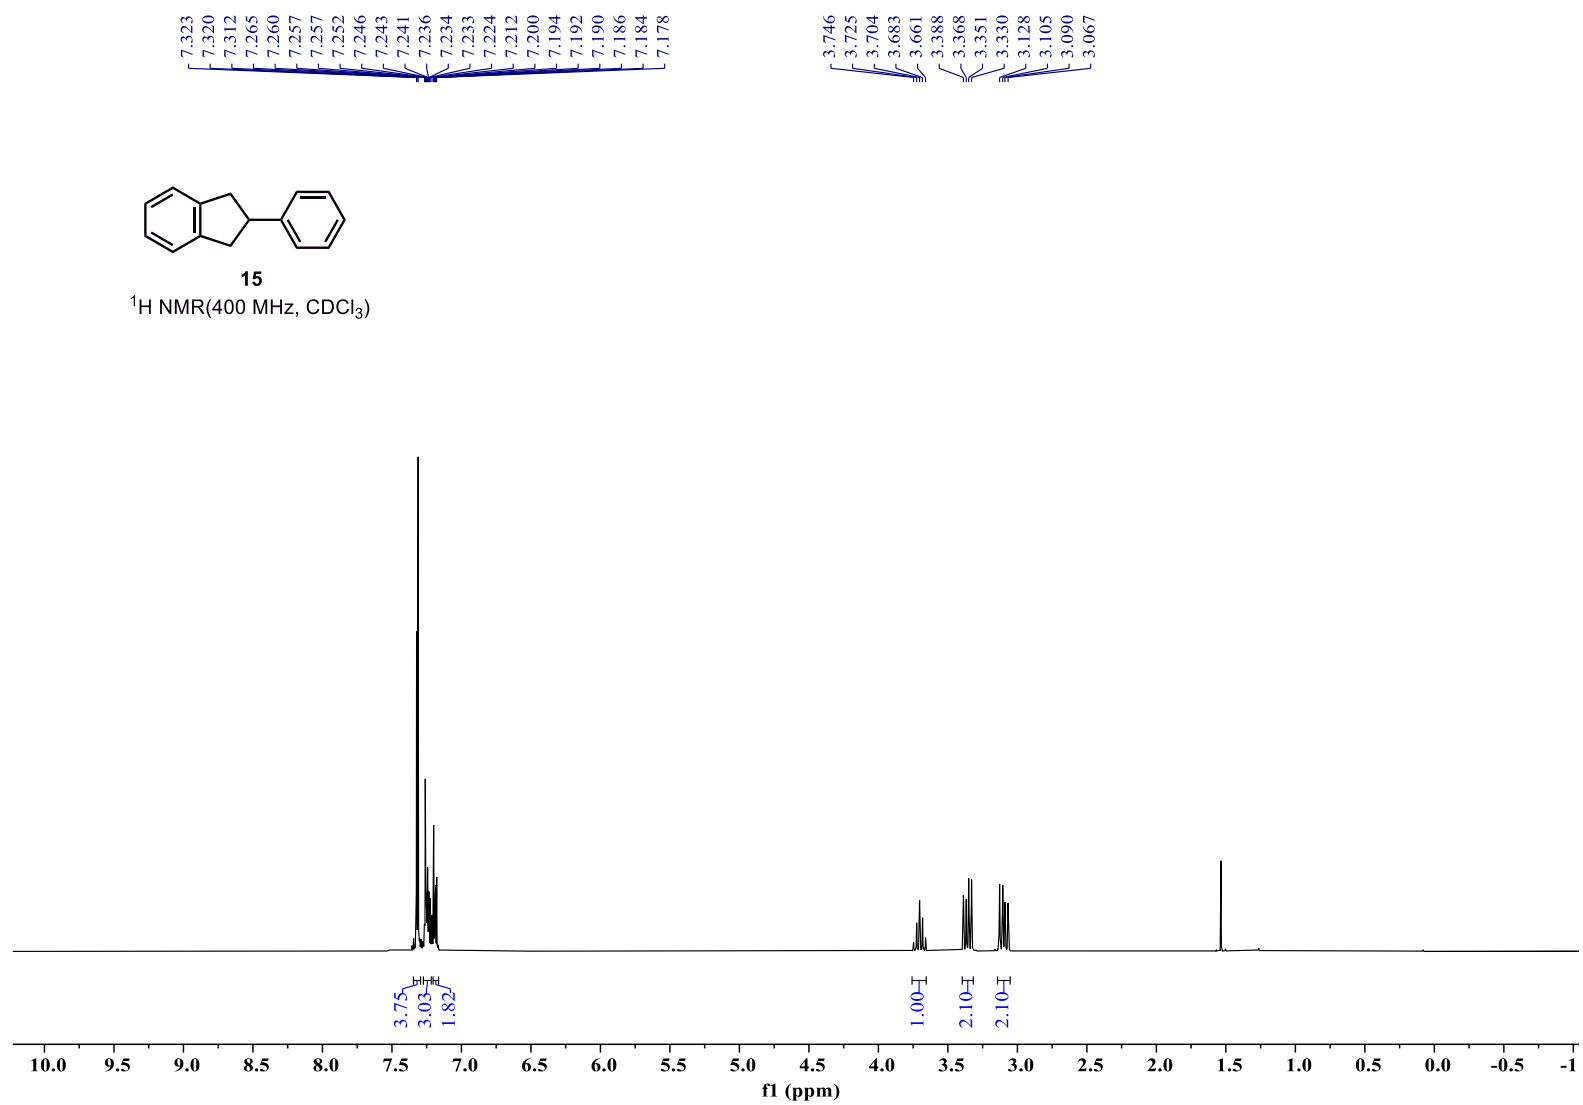

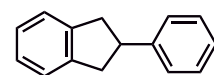

**15**

$^{13}\text{C}$  NMR (101 MHz,  $\text{CDCl}_3$ )

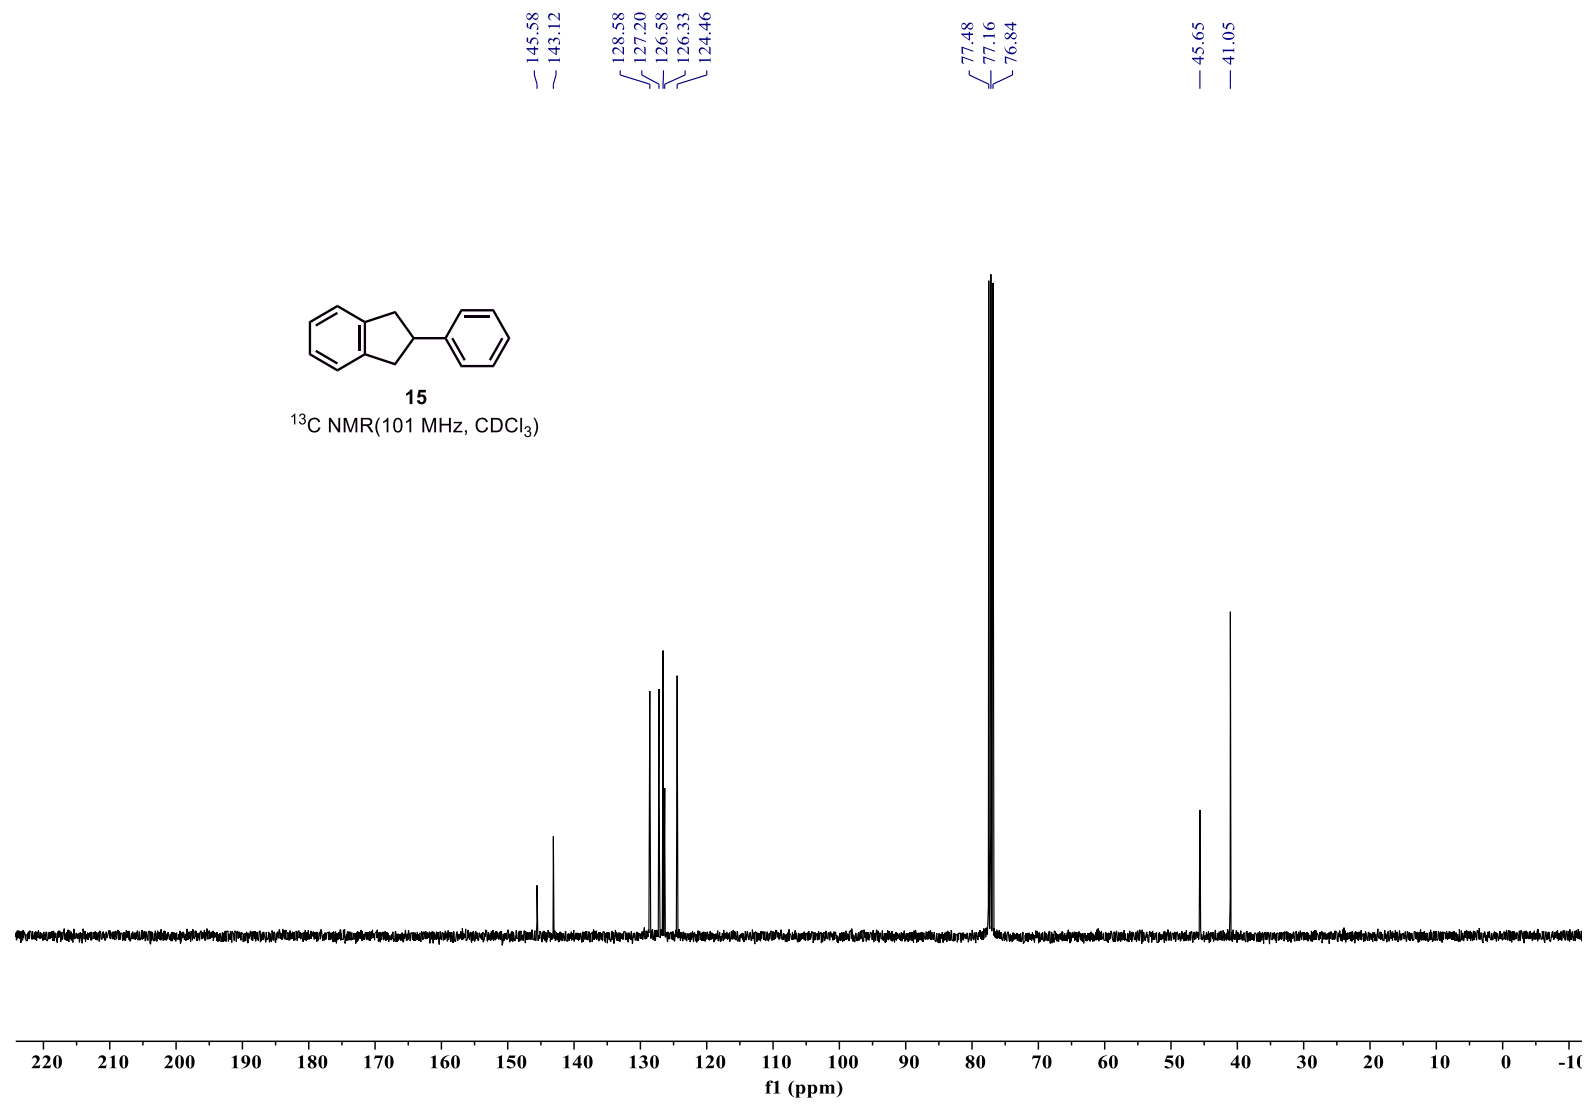

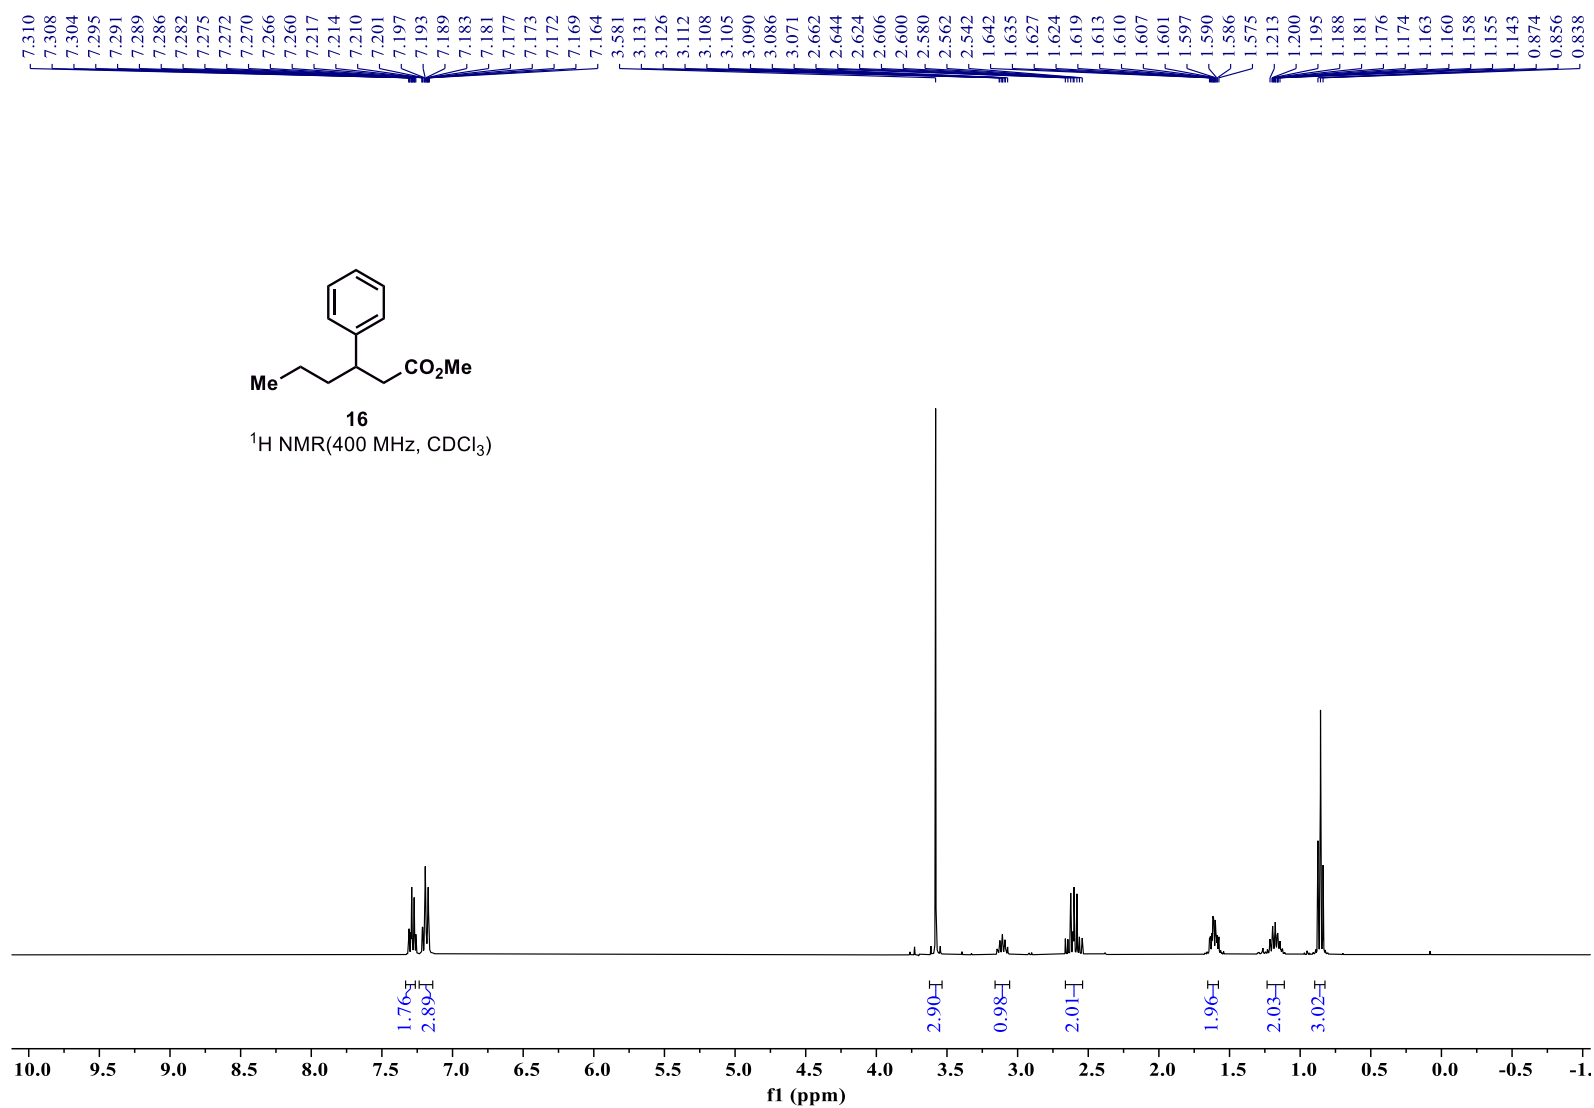

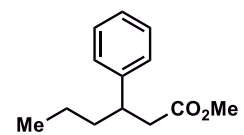

**16**  
 $^{13}\text{C}$  NMR (101 MHz,  $\text{CDCl}_3$ )

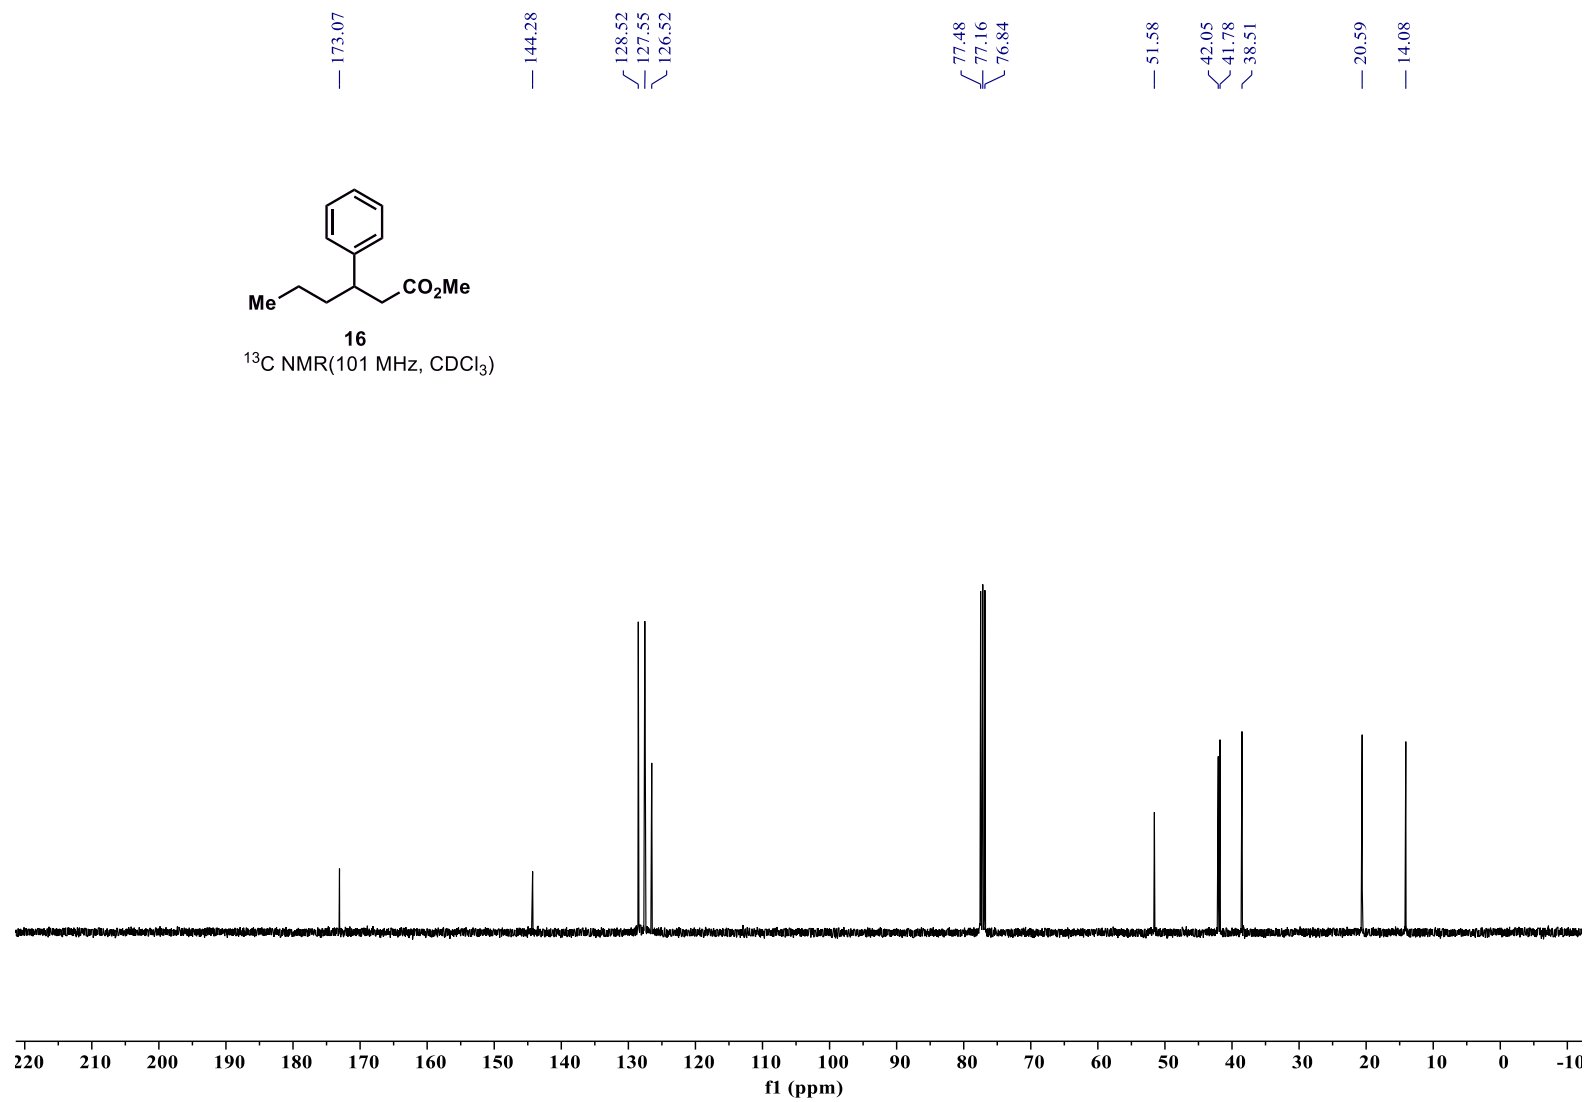

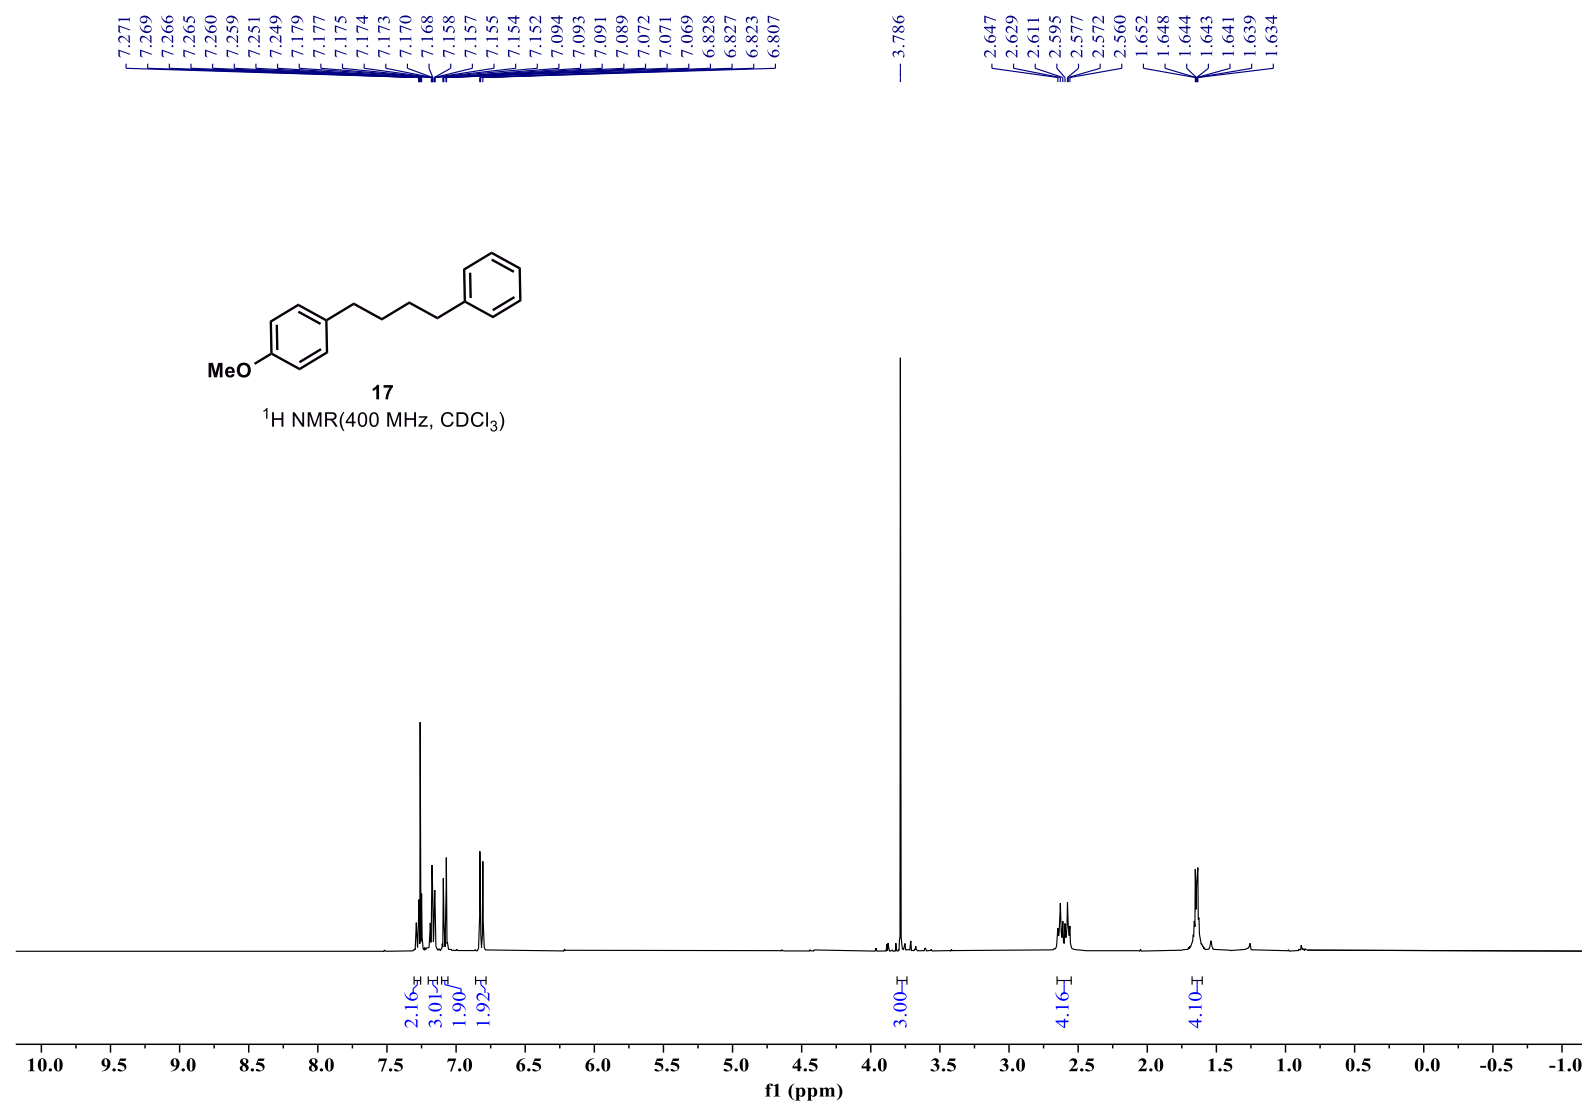

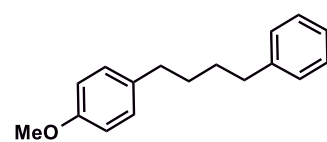

<sup>13</sup>C NMR(101 MHz, CDCl<sub>3</sub>)

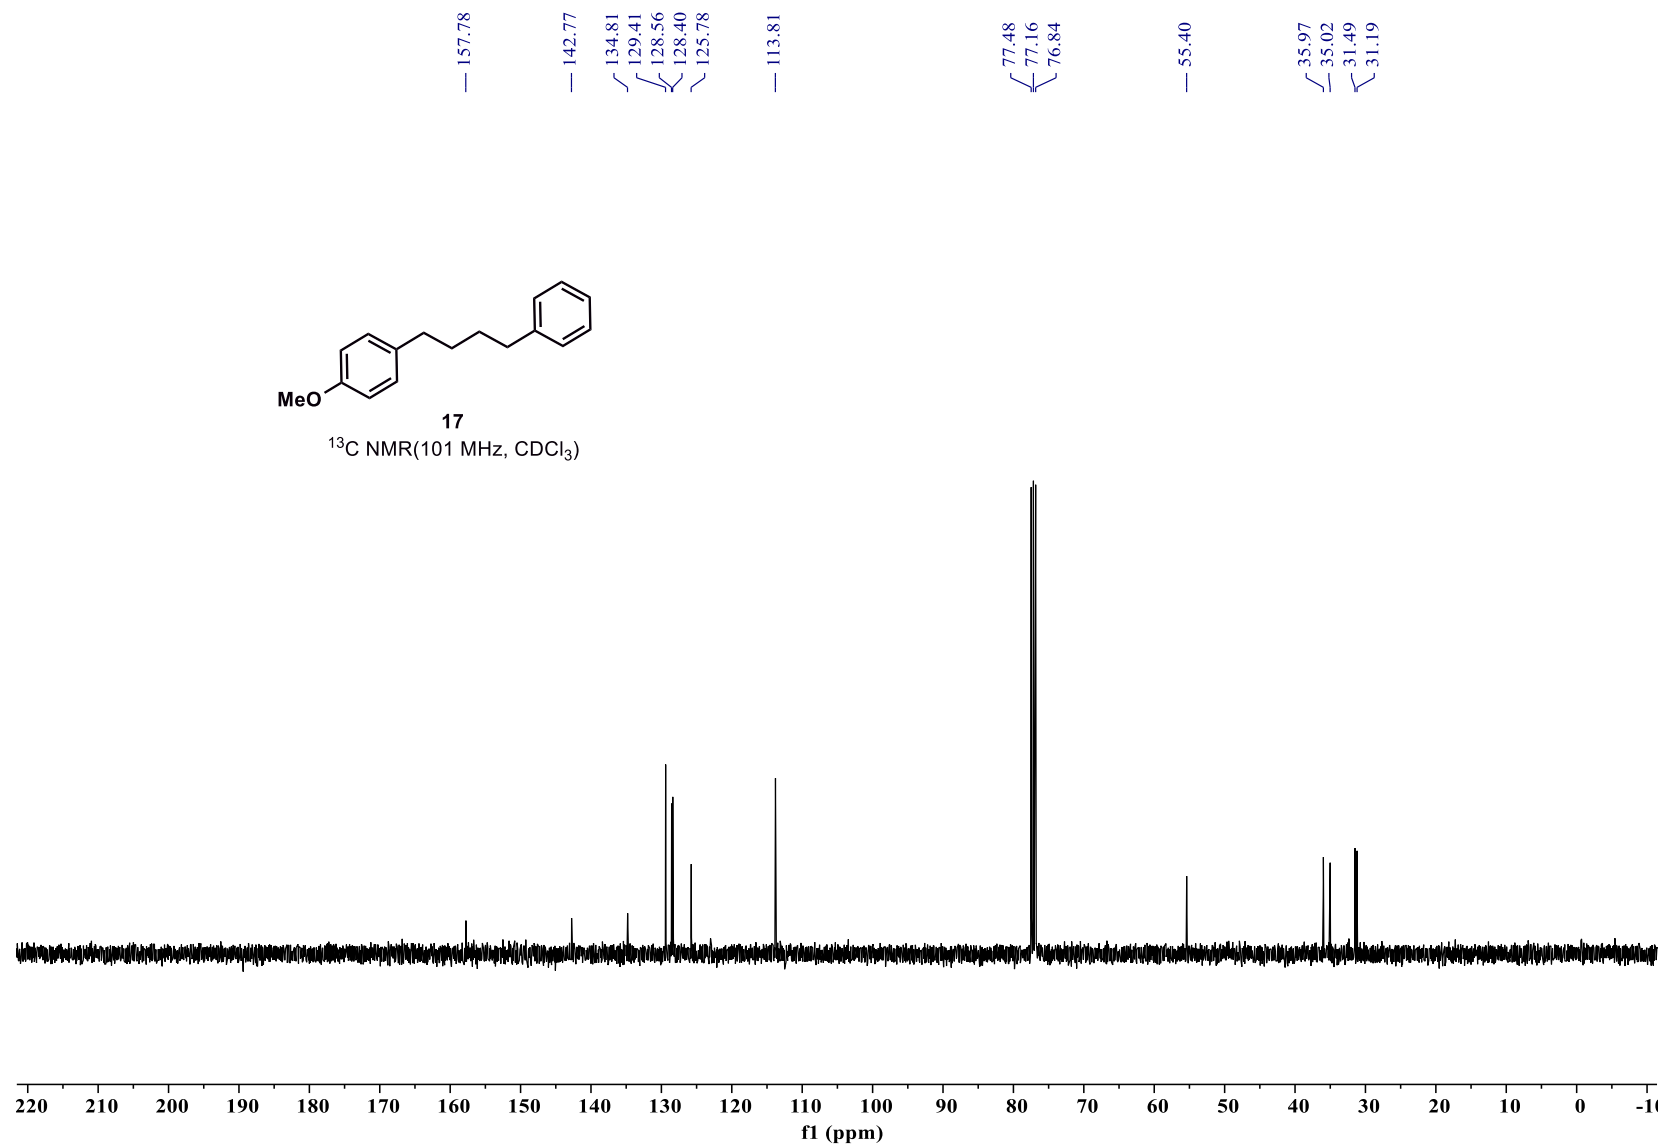

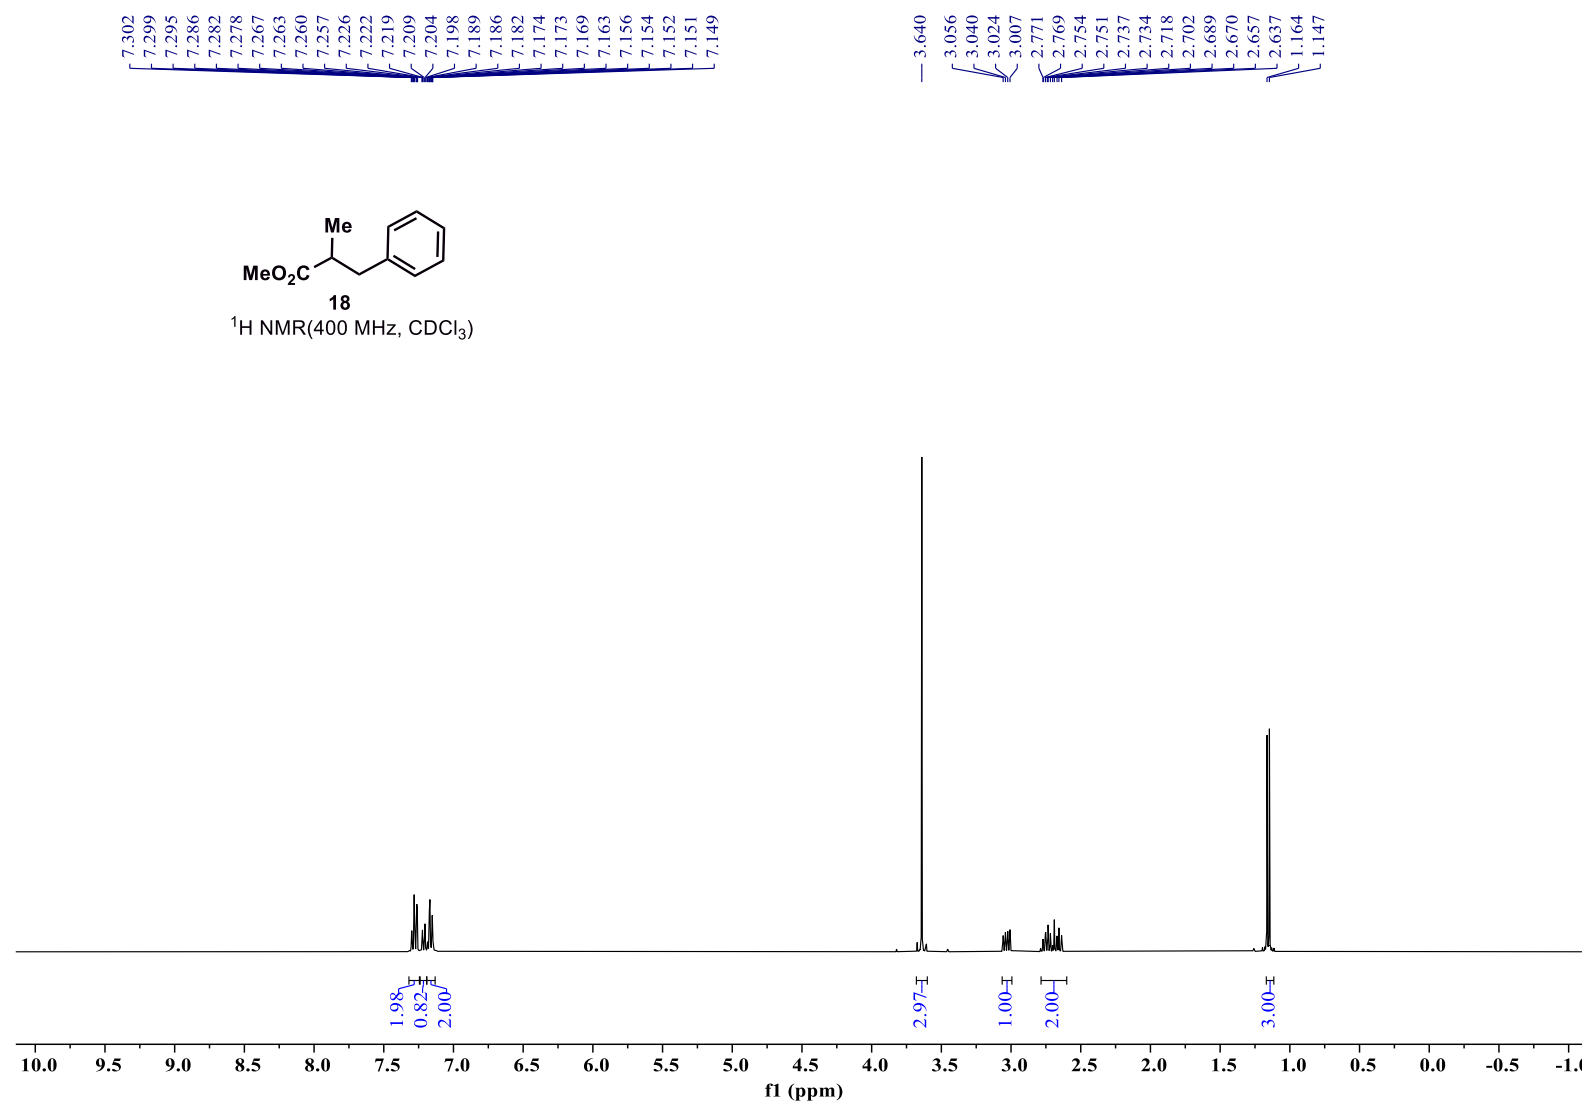

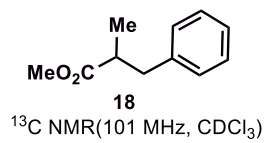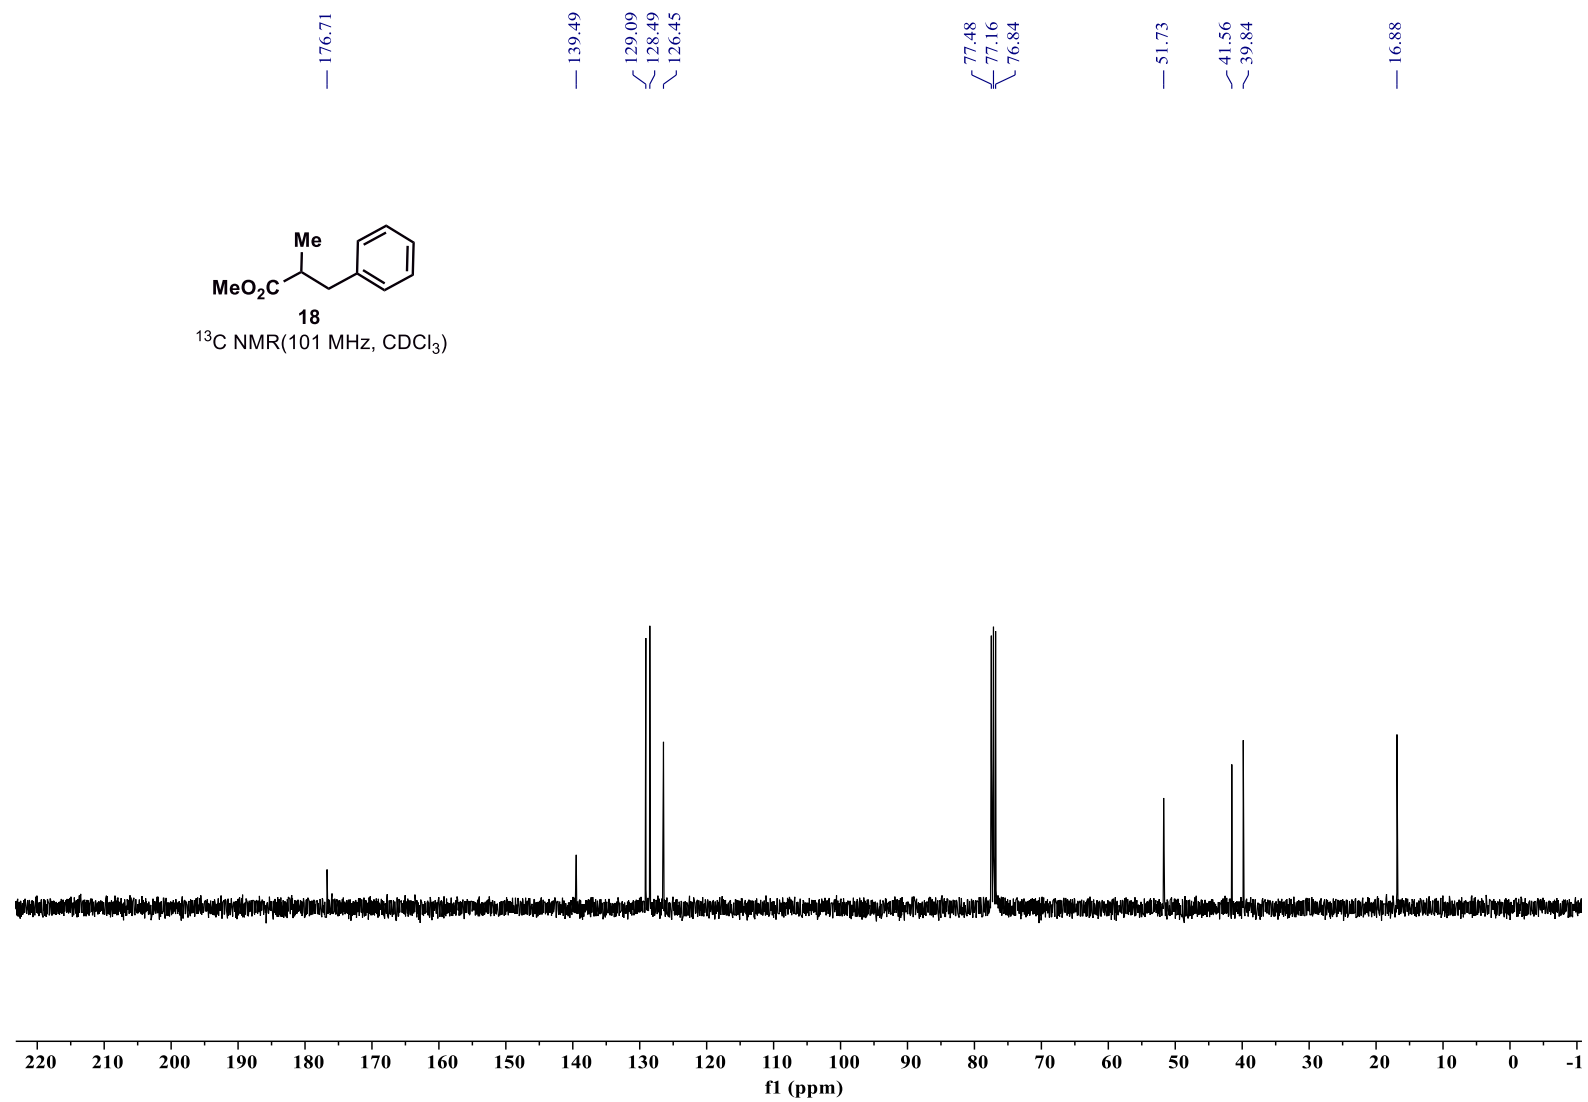

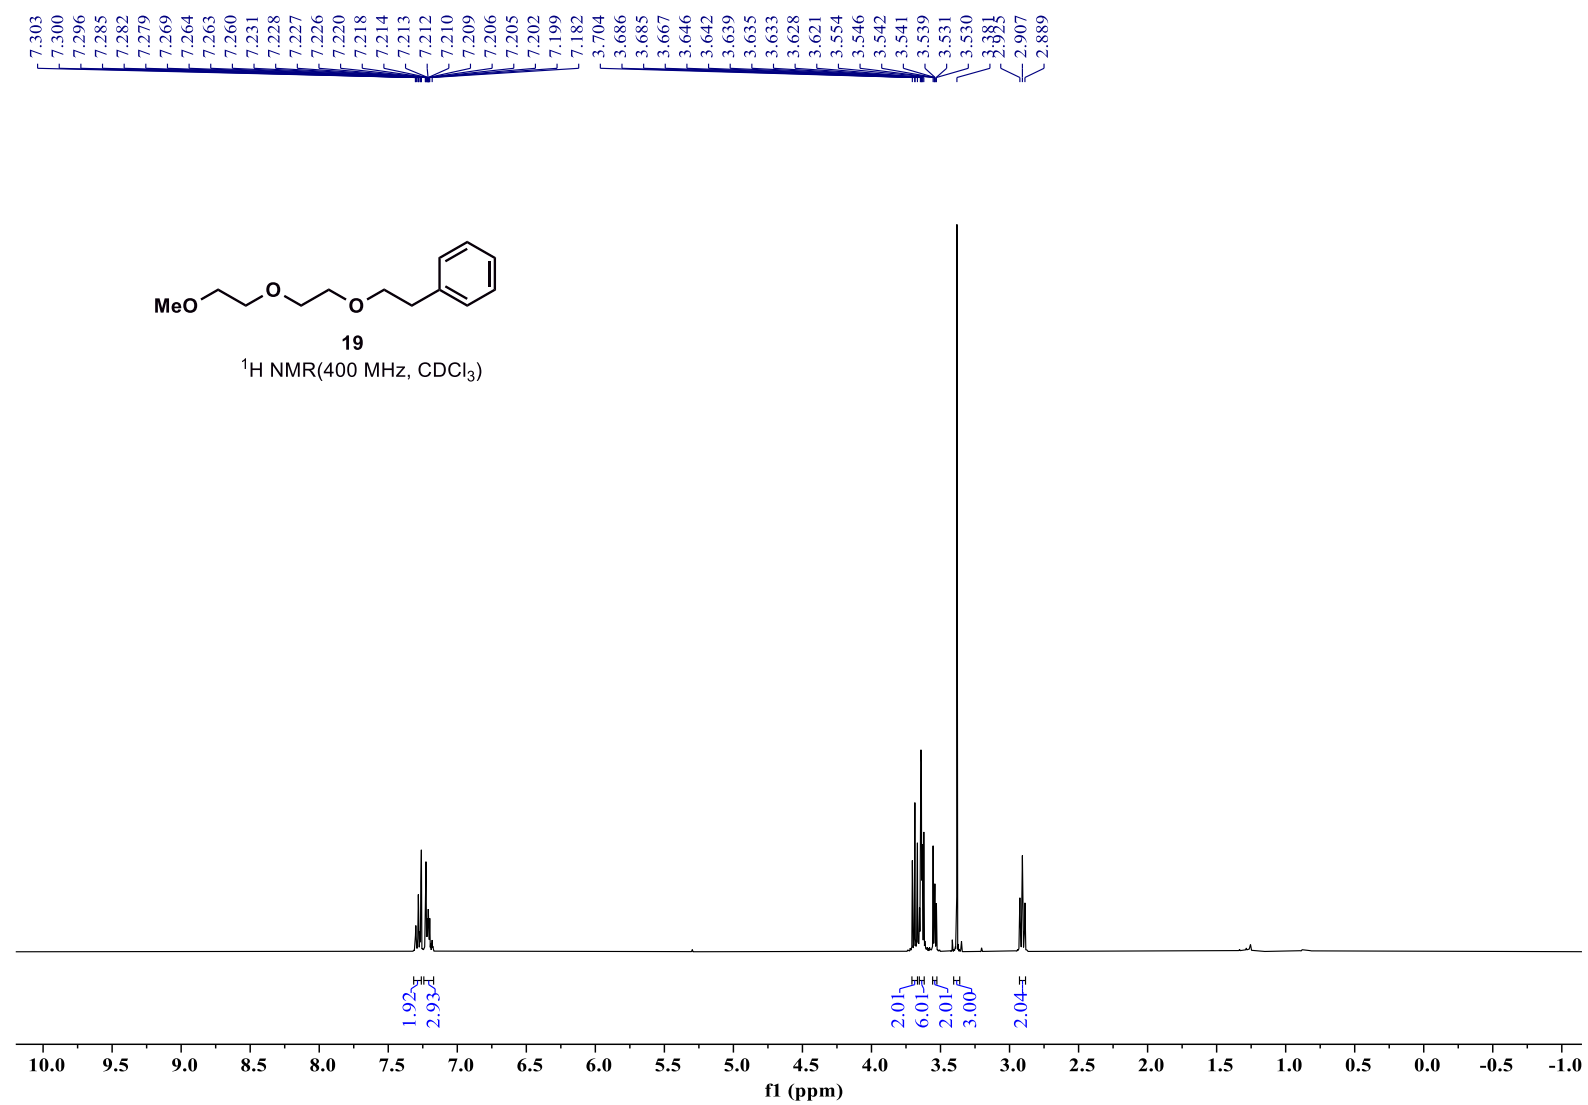

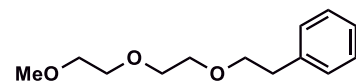

**19**

$^{13}\text{C}$  NMR (101 MHz,  $\text{CDCl}_3$ )

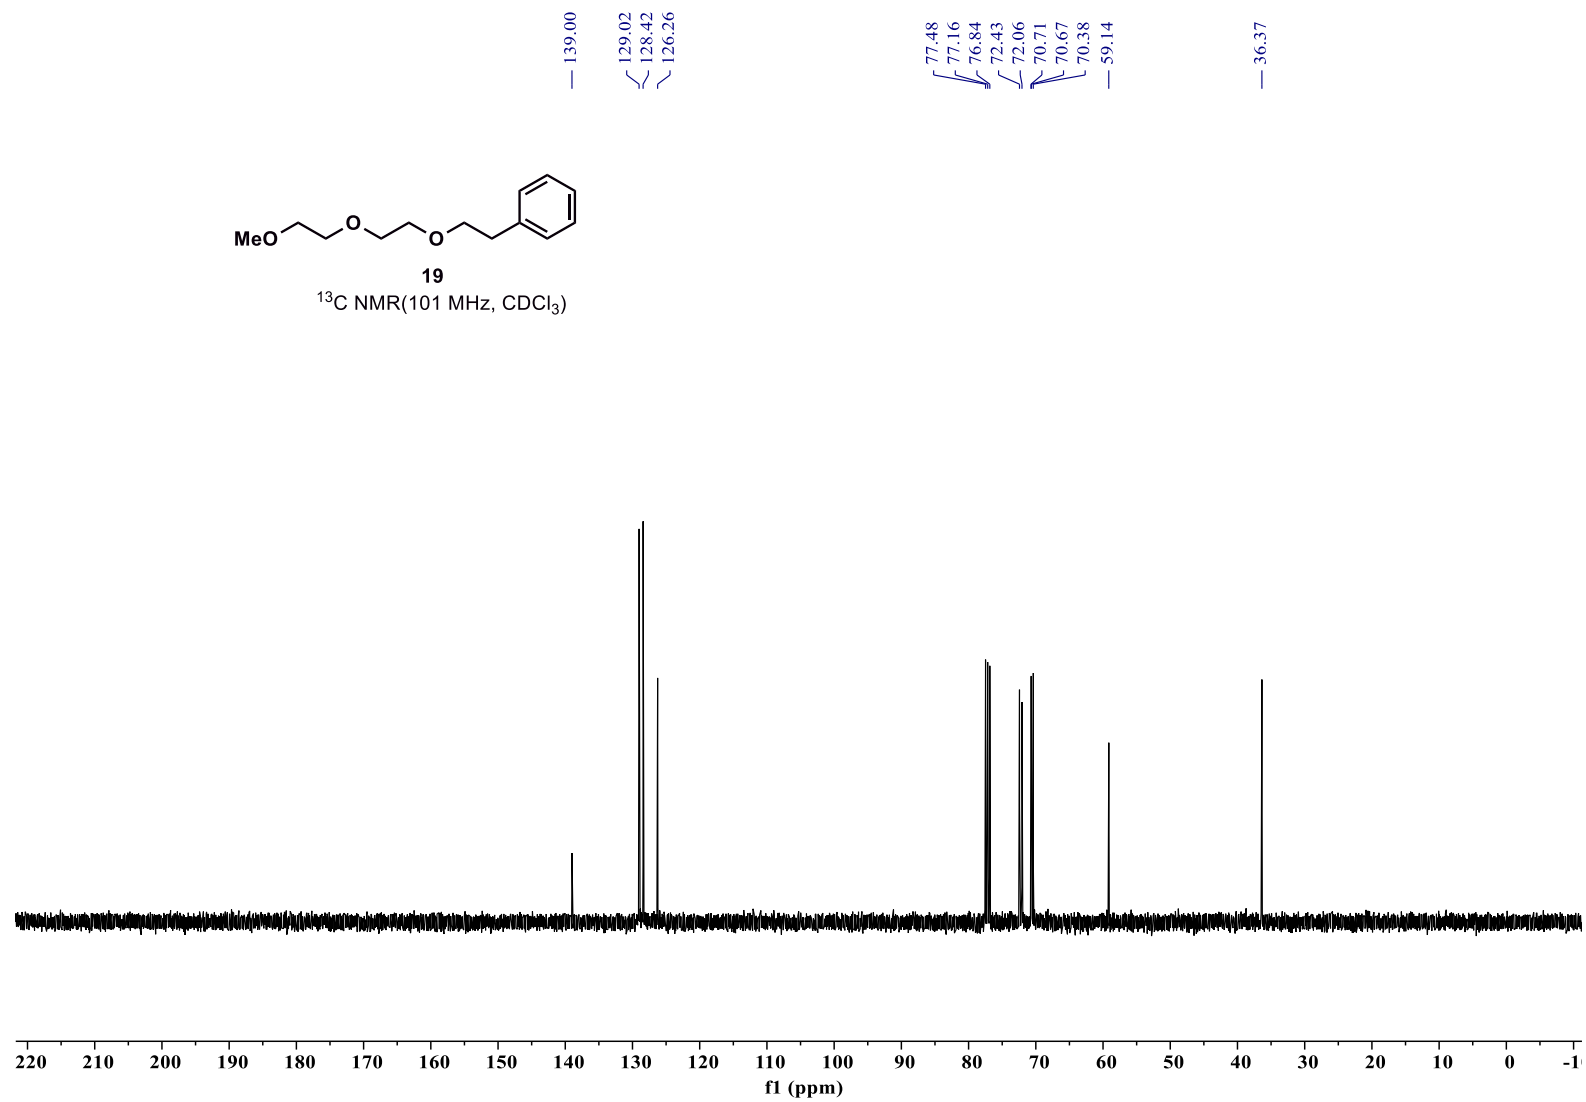

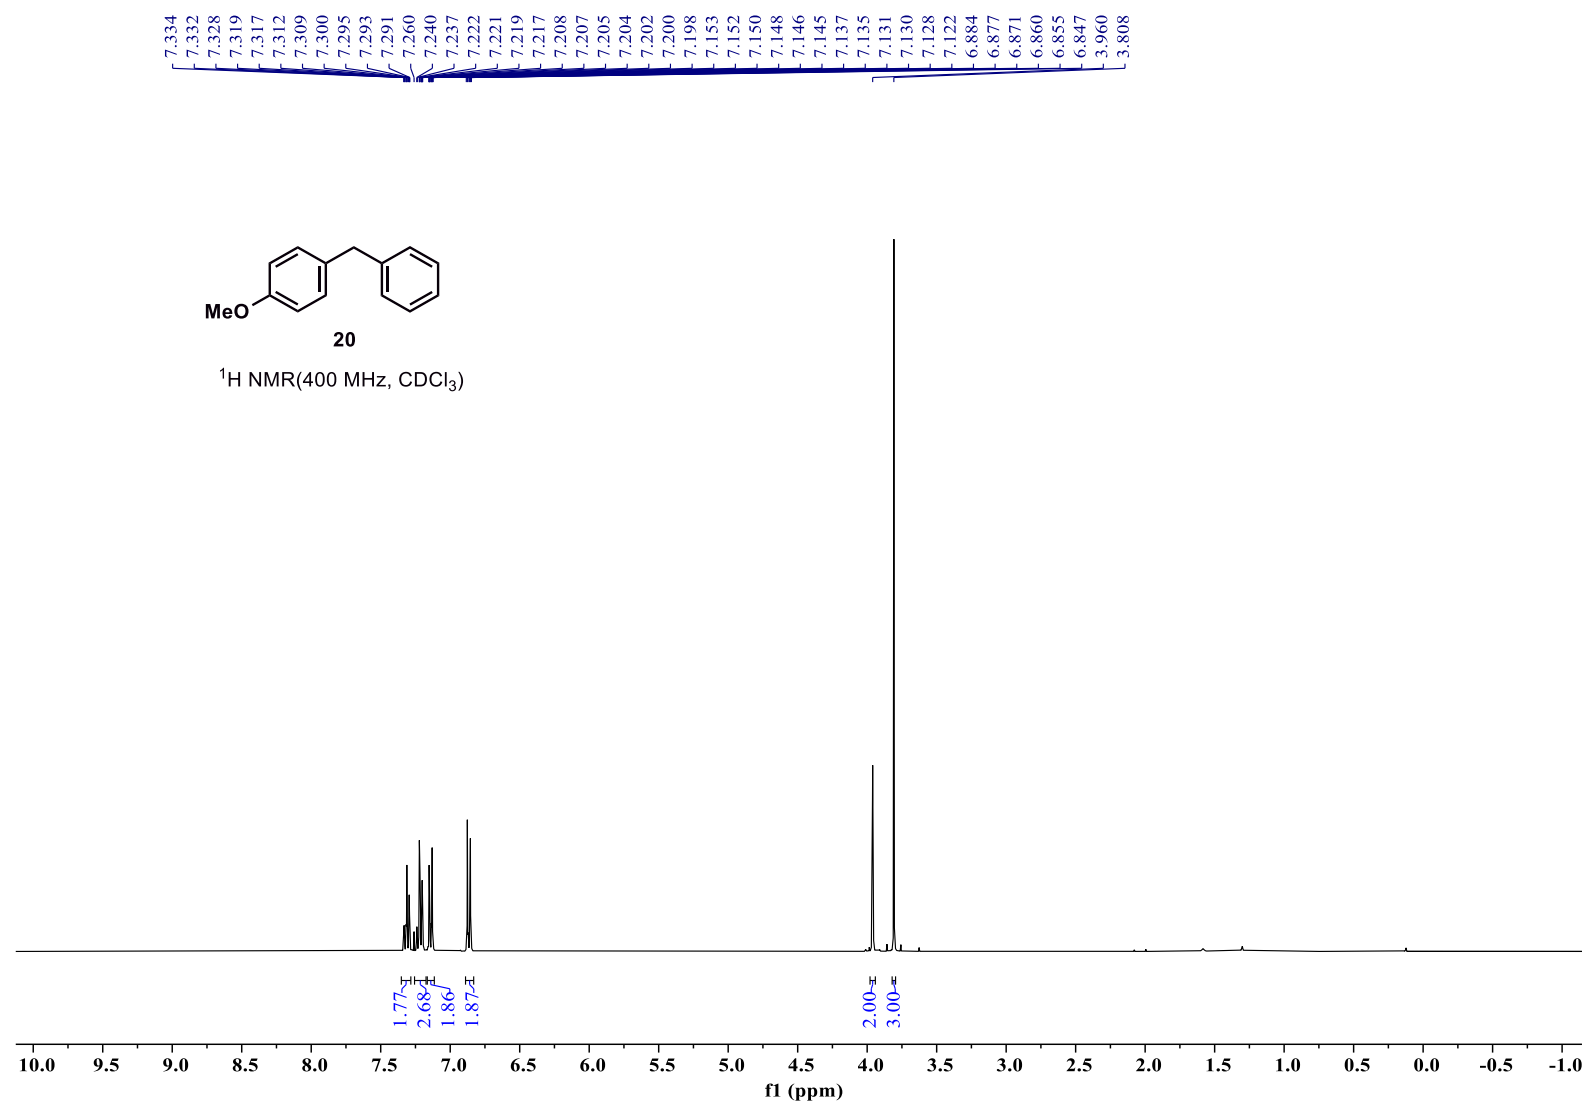

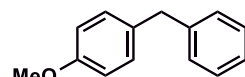

**20**

$^{13}\text{C}$  NMR (101 MHz,  $\text{CDCl}_3$ )

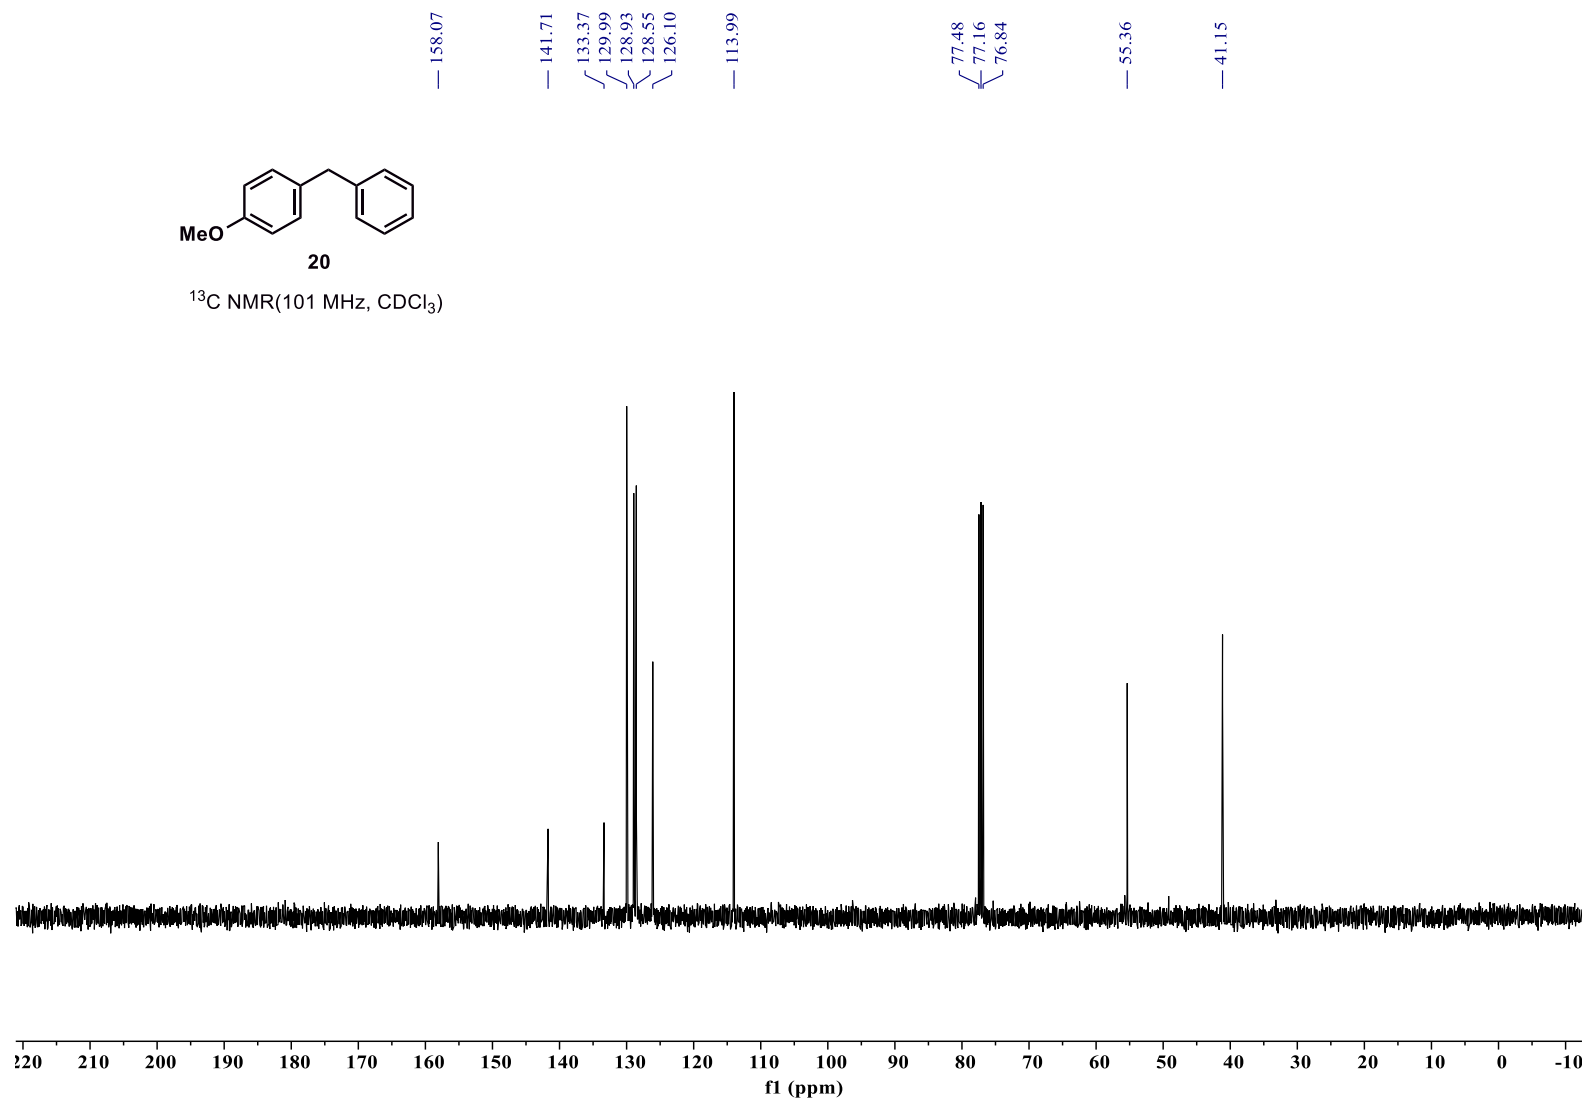

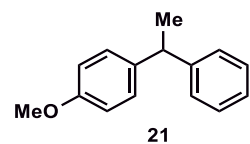

$^1\text{H}$  NMR(400 MHz,  $\text{CDCl}_3$ )

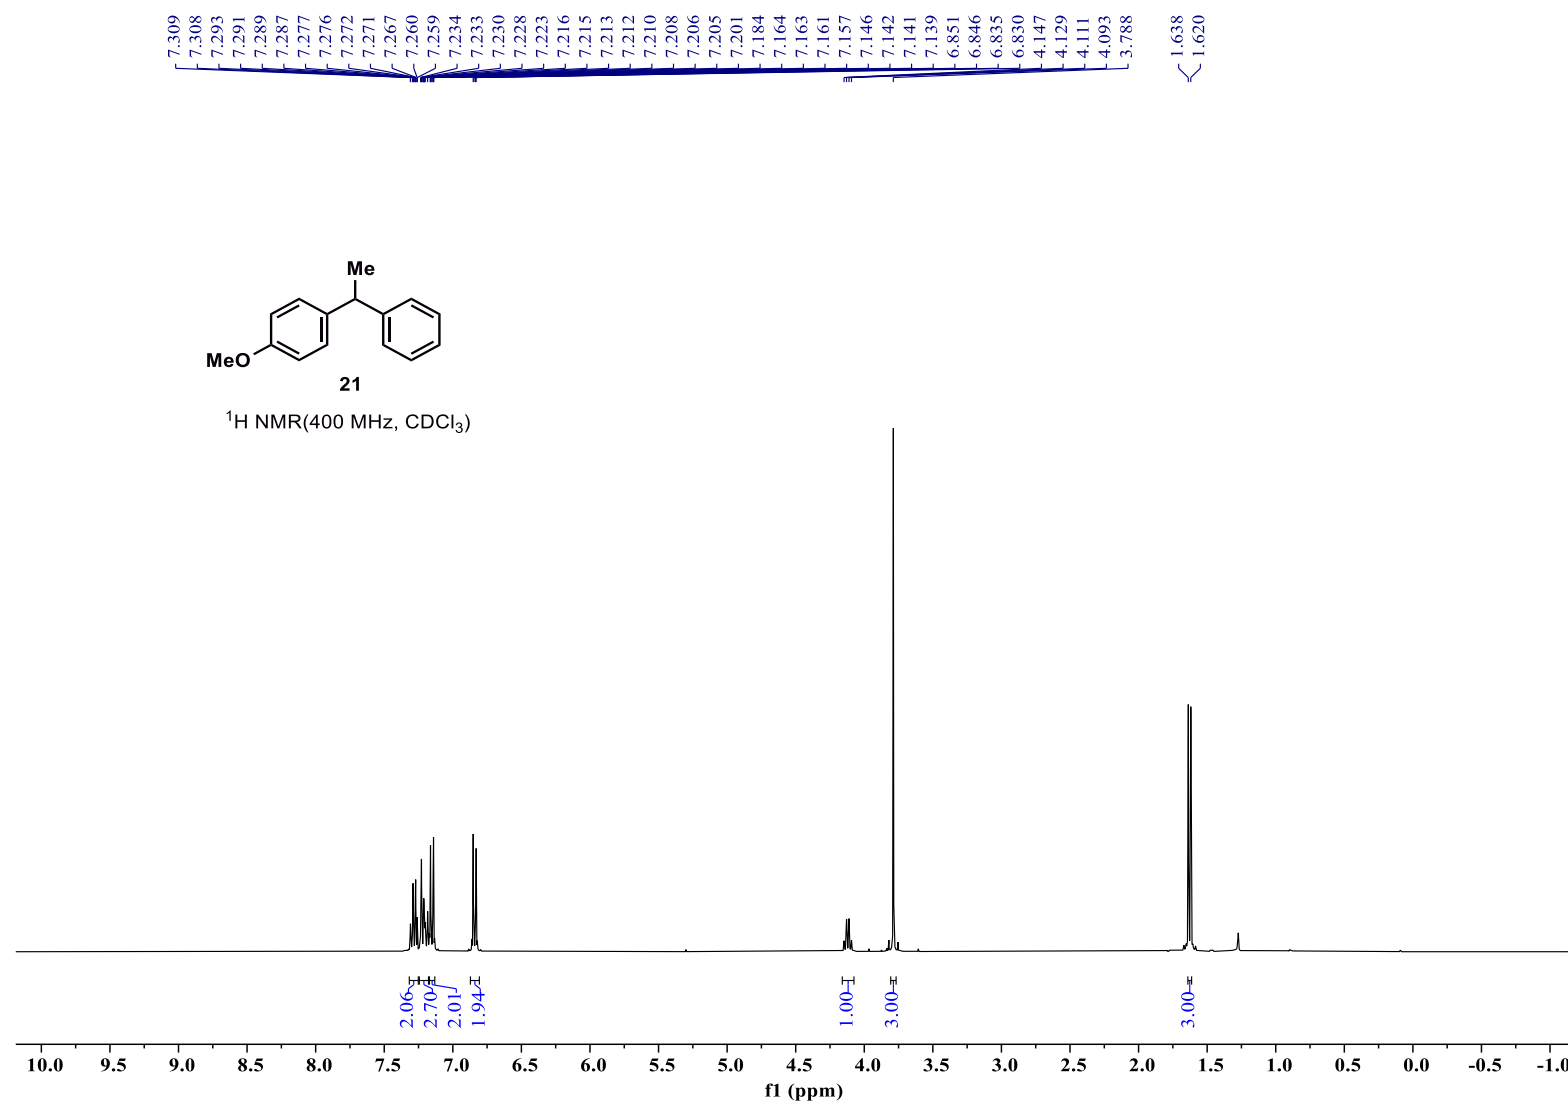

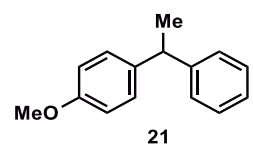

$^{13}\text{C}$  NMR(101 MHz,  $\text{CDCl}_3$ )

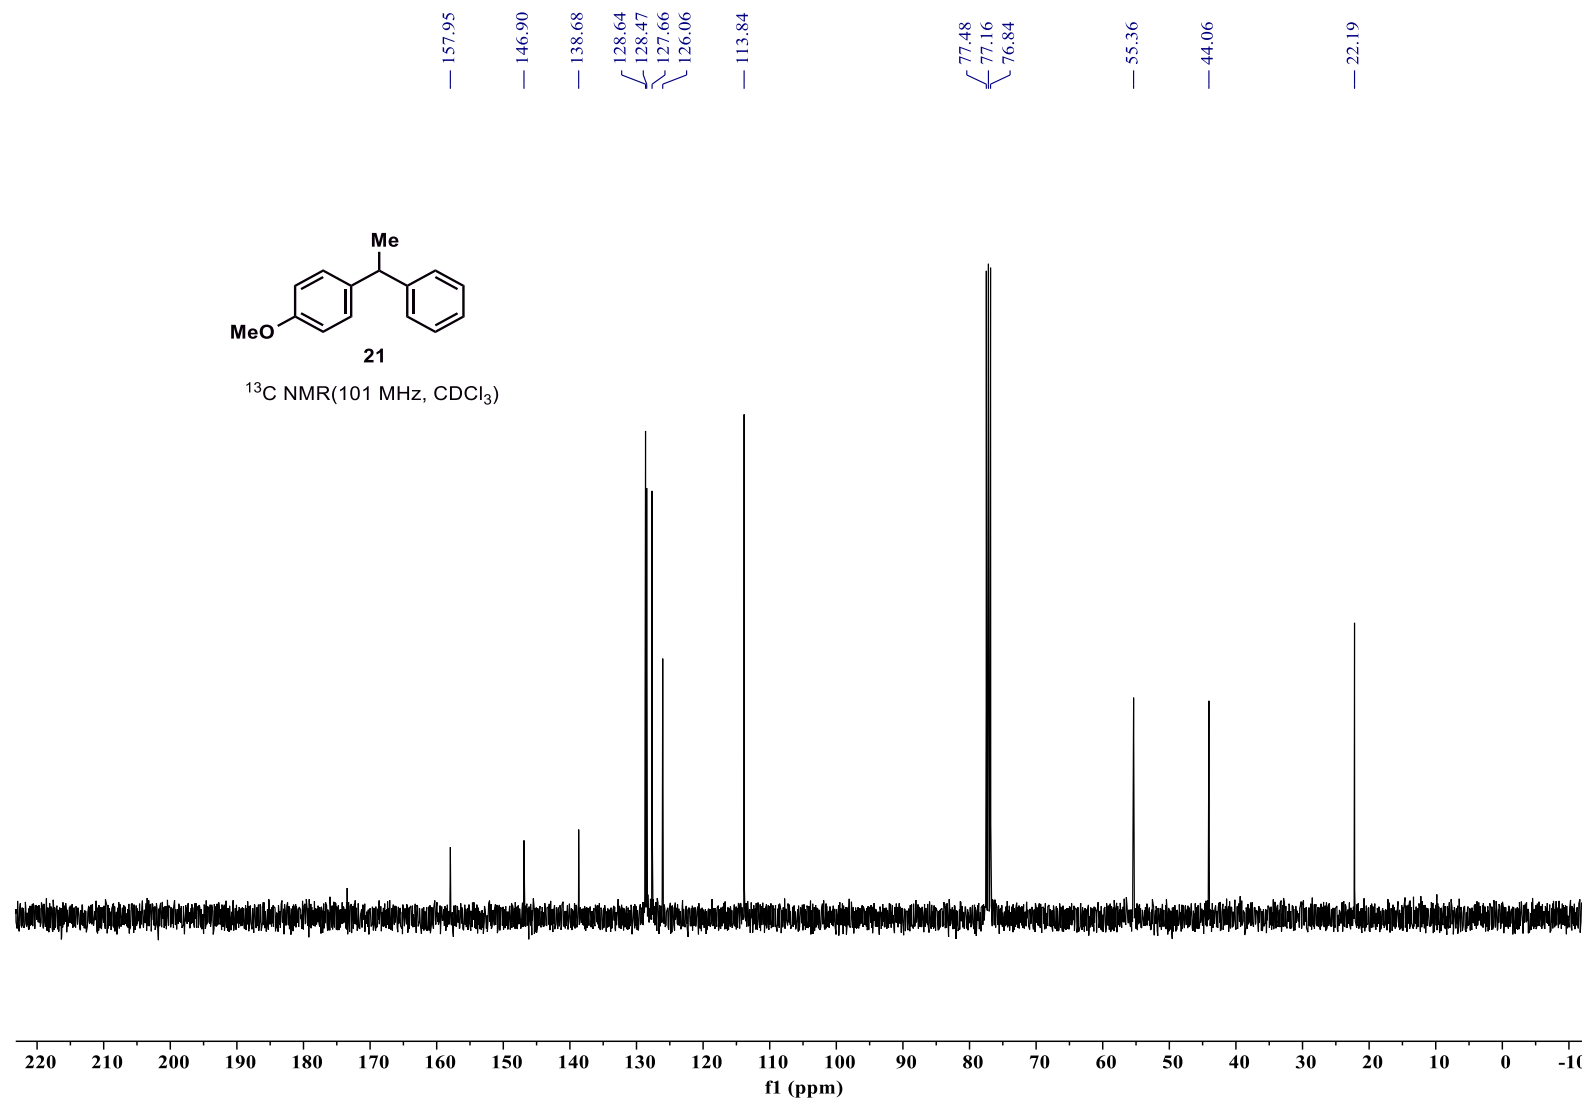

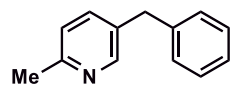

22

$^1\text{H}$  NMR(400 MHz,  $\text{CDCl}_3$ )

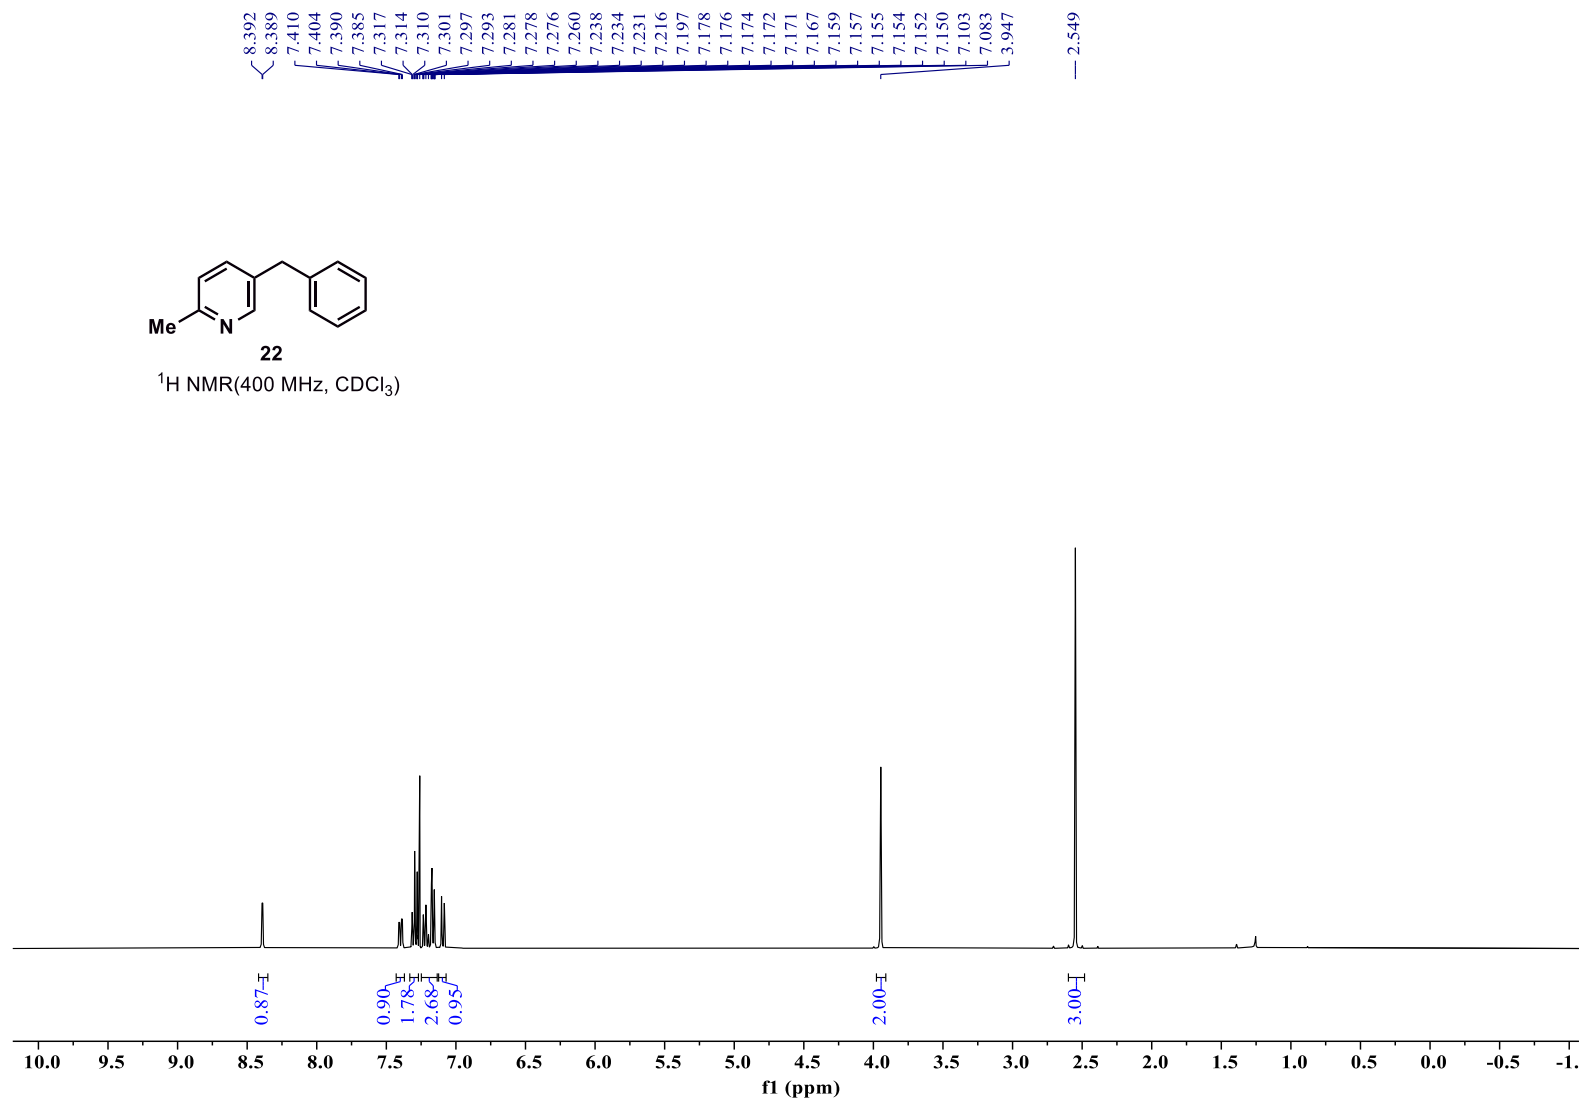

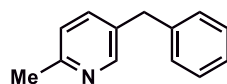

**22**

<sup>13</sup>C NMR (101 MHz, CDCl<sub>3</sub>)

— 156.15

— 149.23

✓ 140.21

✓ 137.02

✓ 133.52

✓ 128.87

✓ 128.73

✓ 126.49

✓ 123.23

77.48  
77.16  
76.84

— 38.71

— 23.97

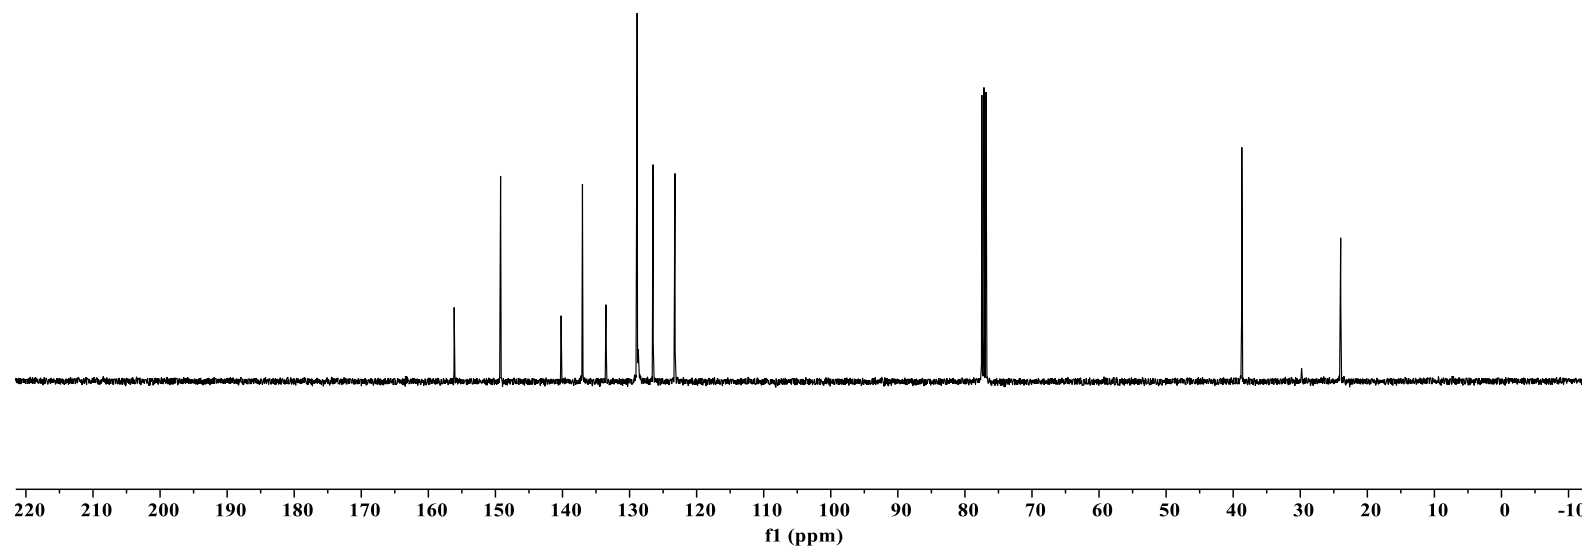

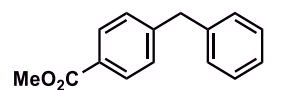

23

<sup>1</sup>H NMR(400 MHz, CDCl<sub>3</sub>)

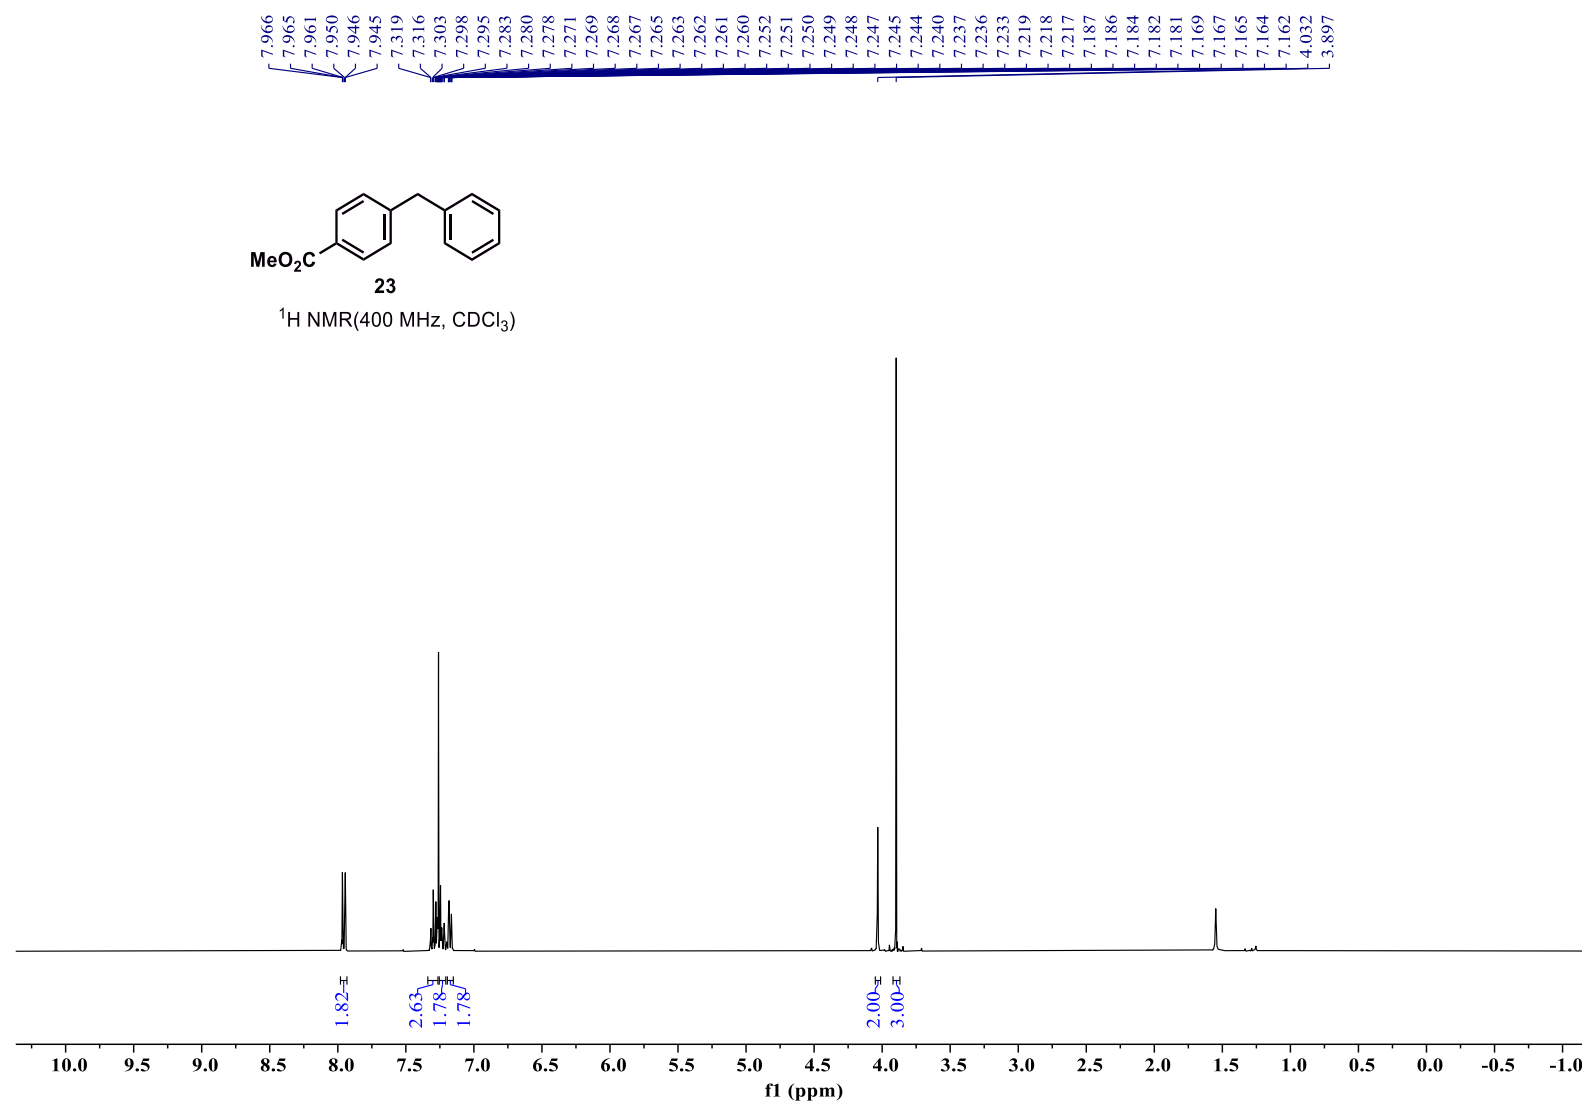

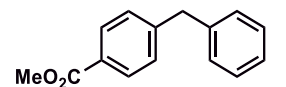

23

$^{13}\text{C}$  NMR(101 MHz,  $\text{CDCl}_3$ )

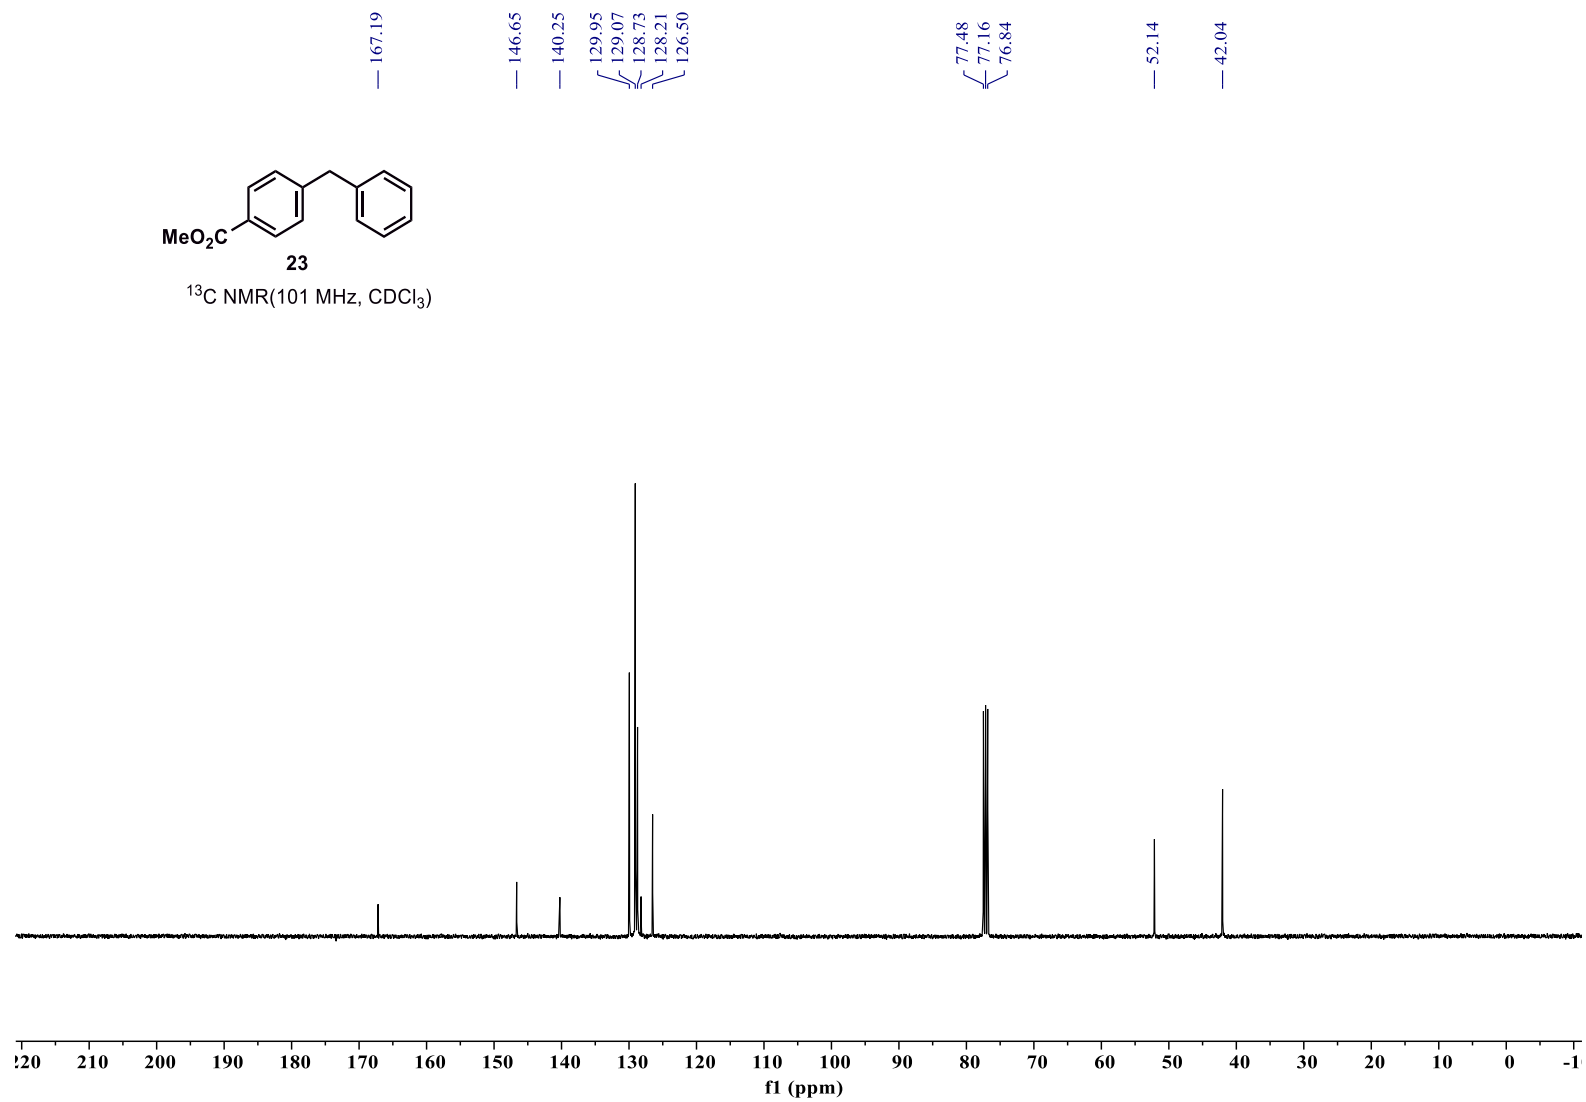

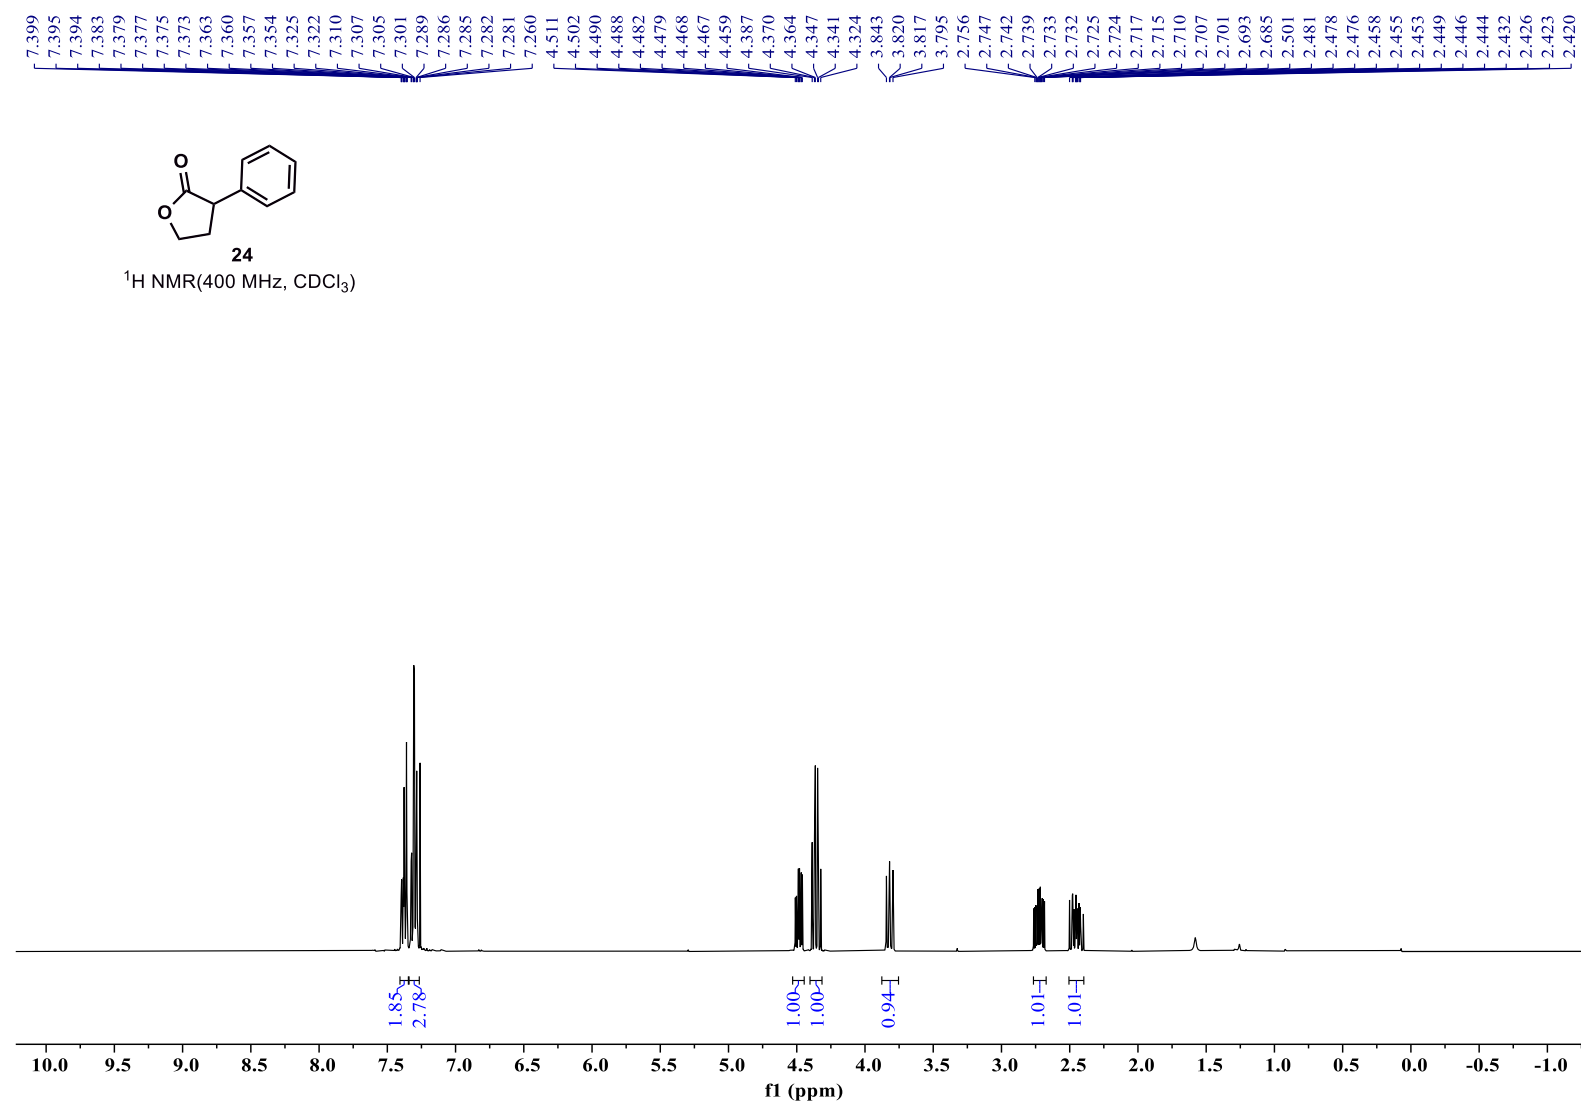

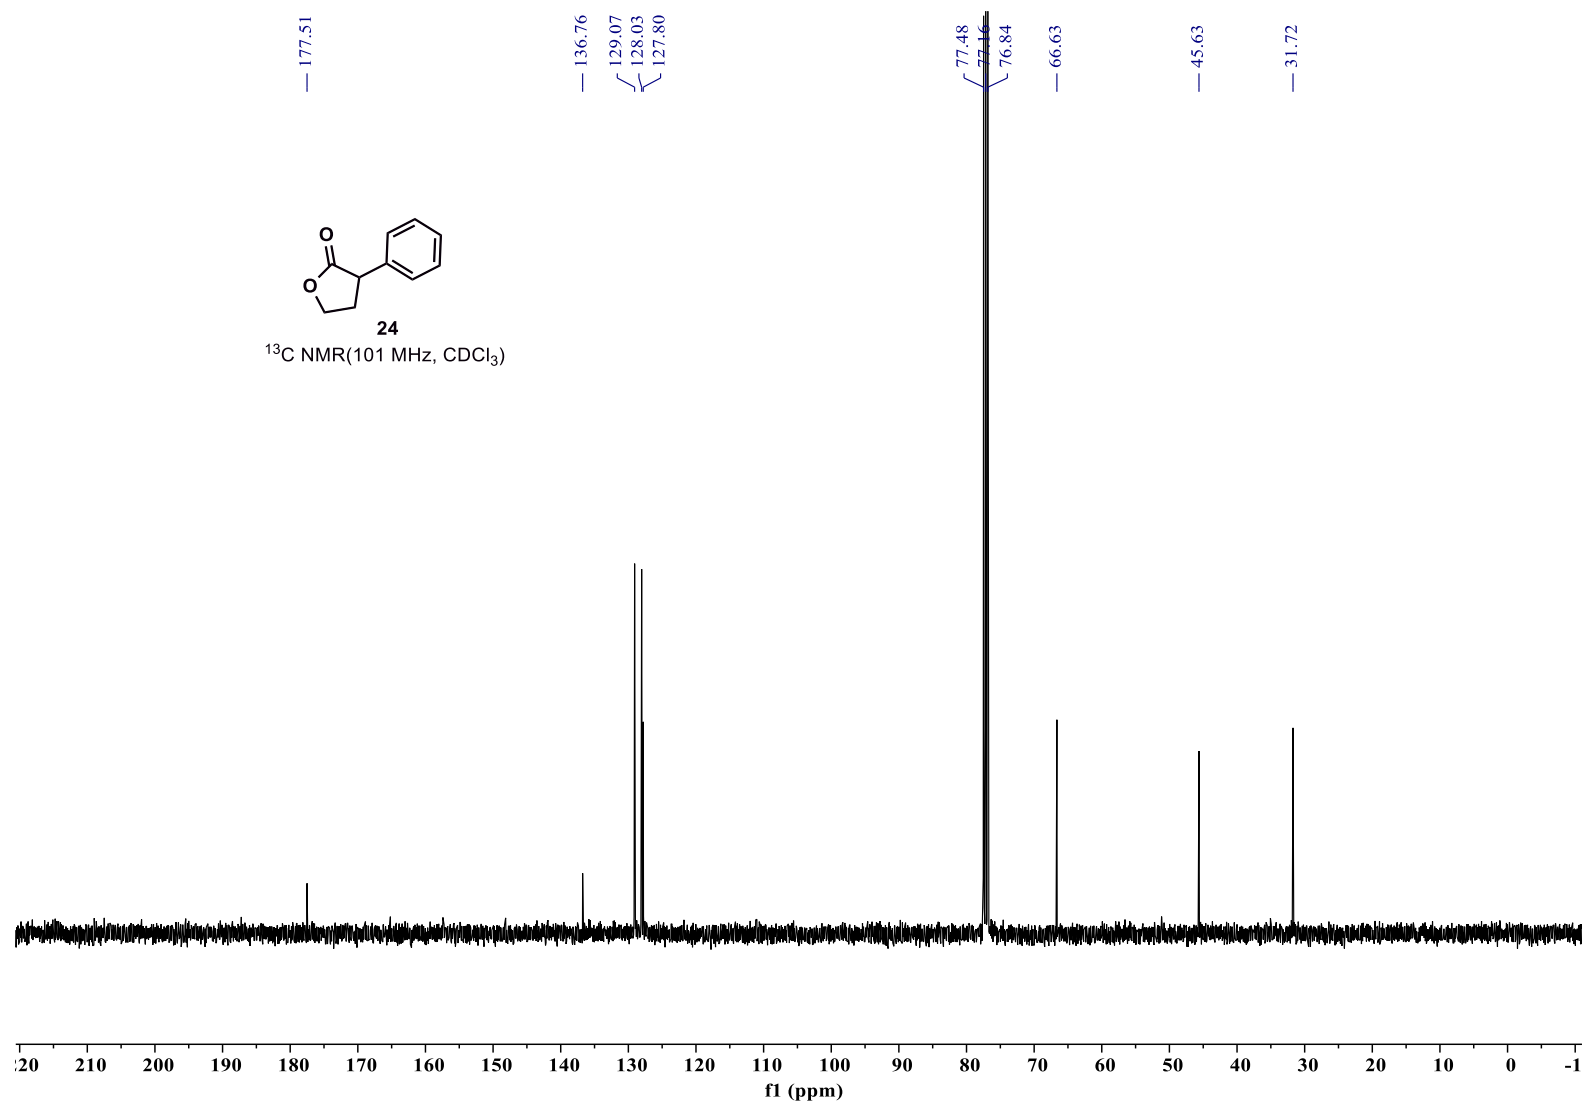

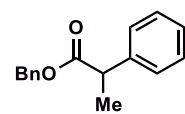

**25**  
<sup>1</sup>H NMR(400 MHz, CDCl<sub>3</sub>)

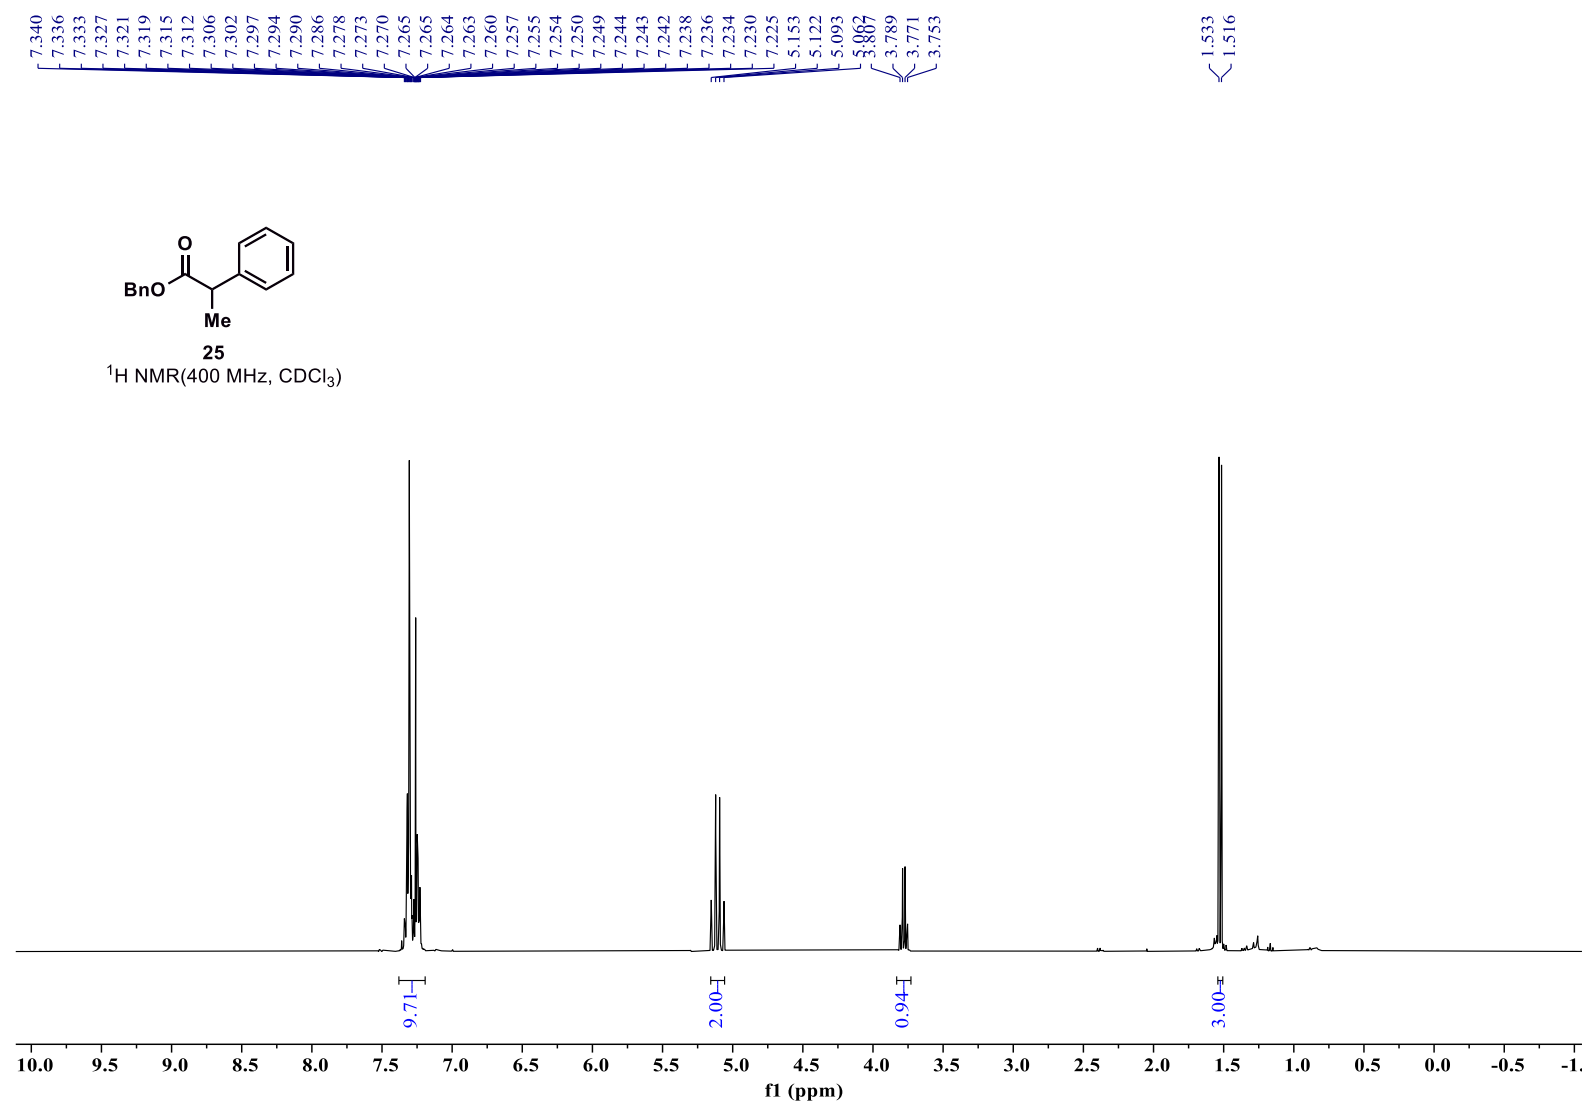

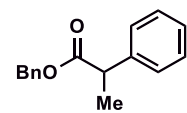

25  
 $^{13}\text{C}$  NMR (101 MHz,  $\text{CDCl}_3$ )

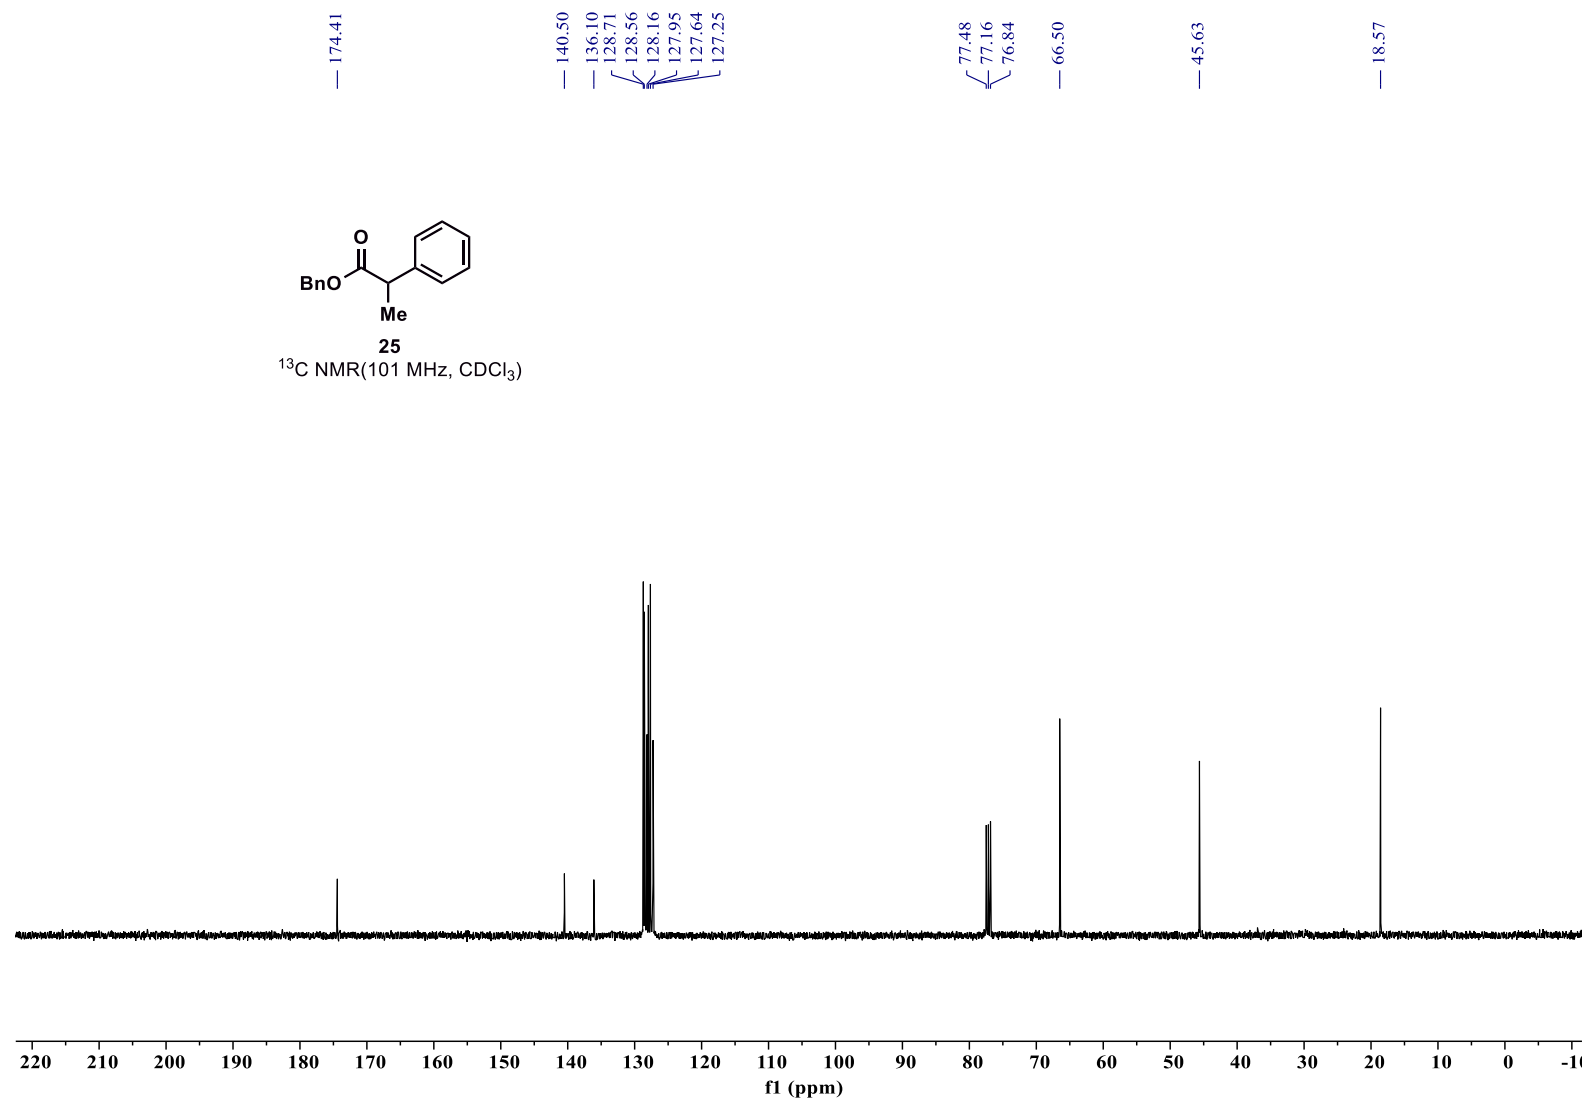

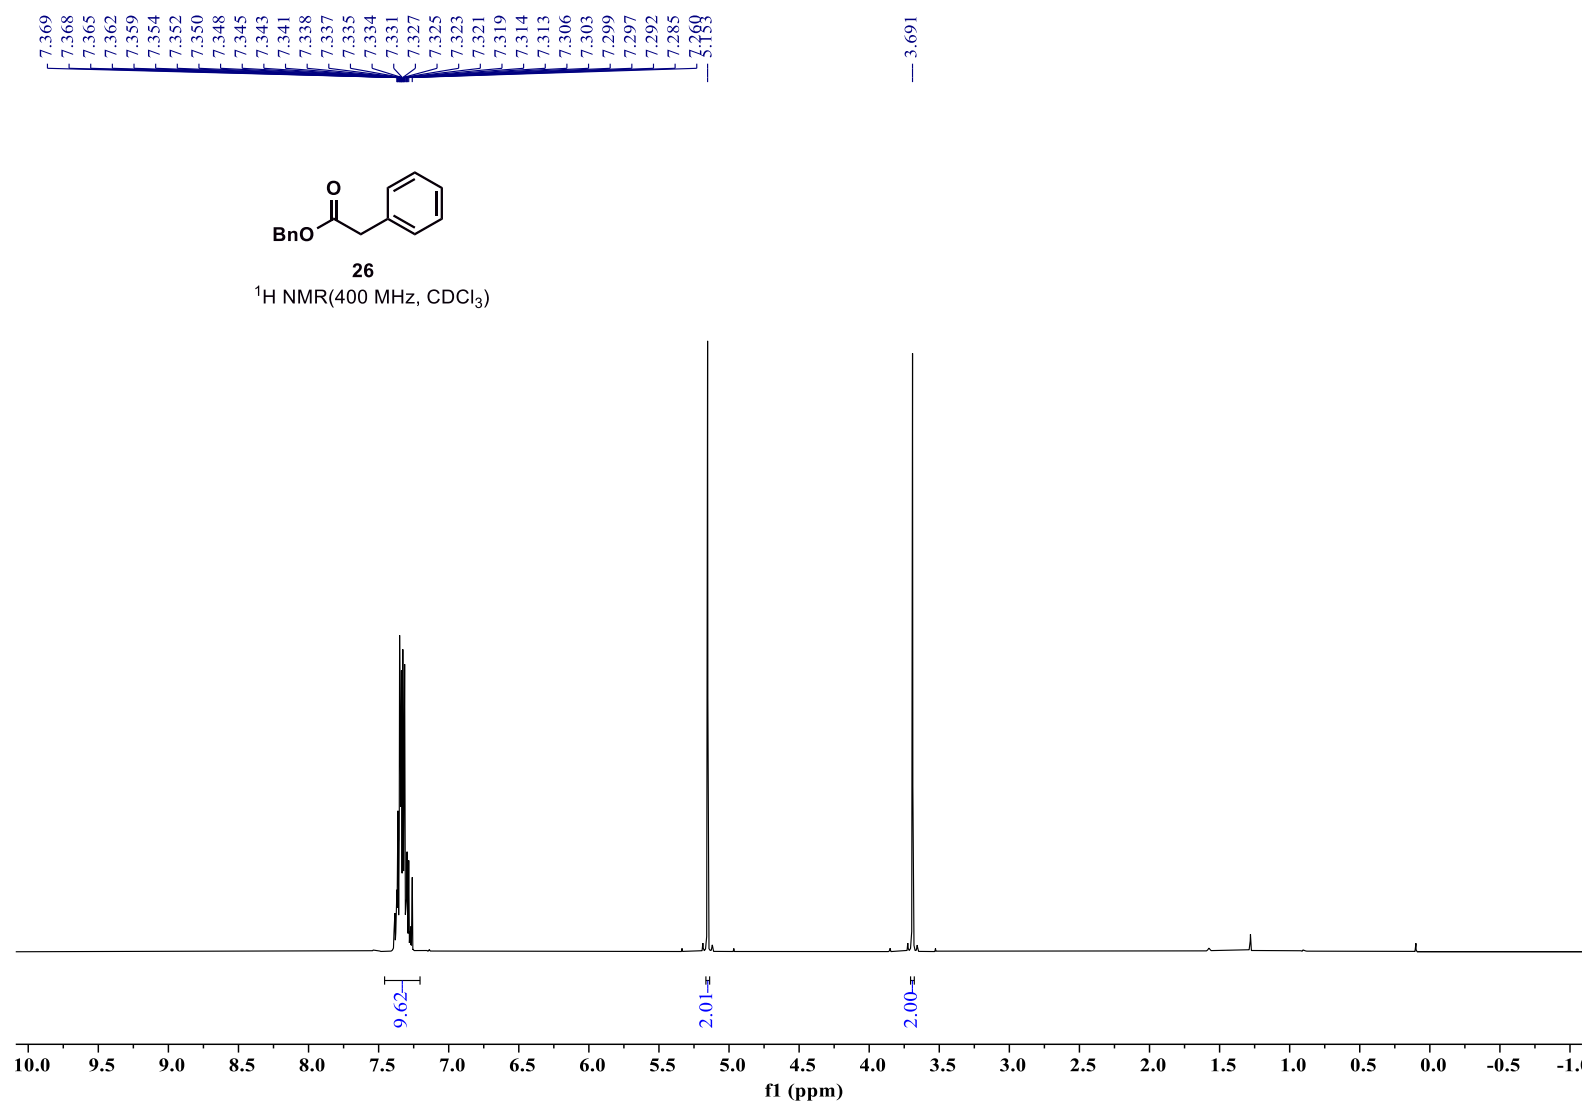

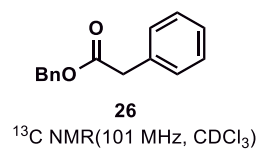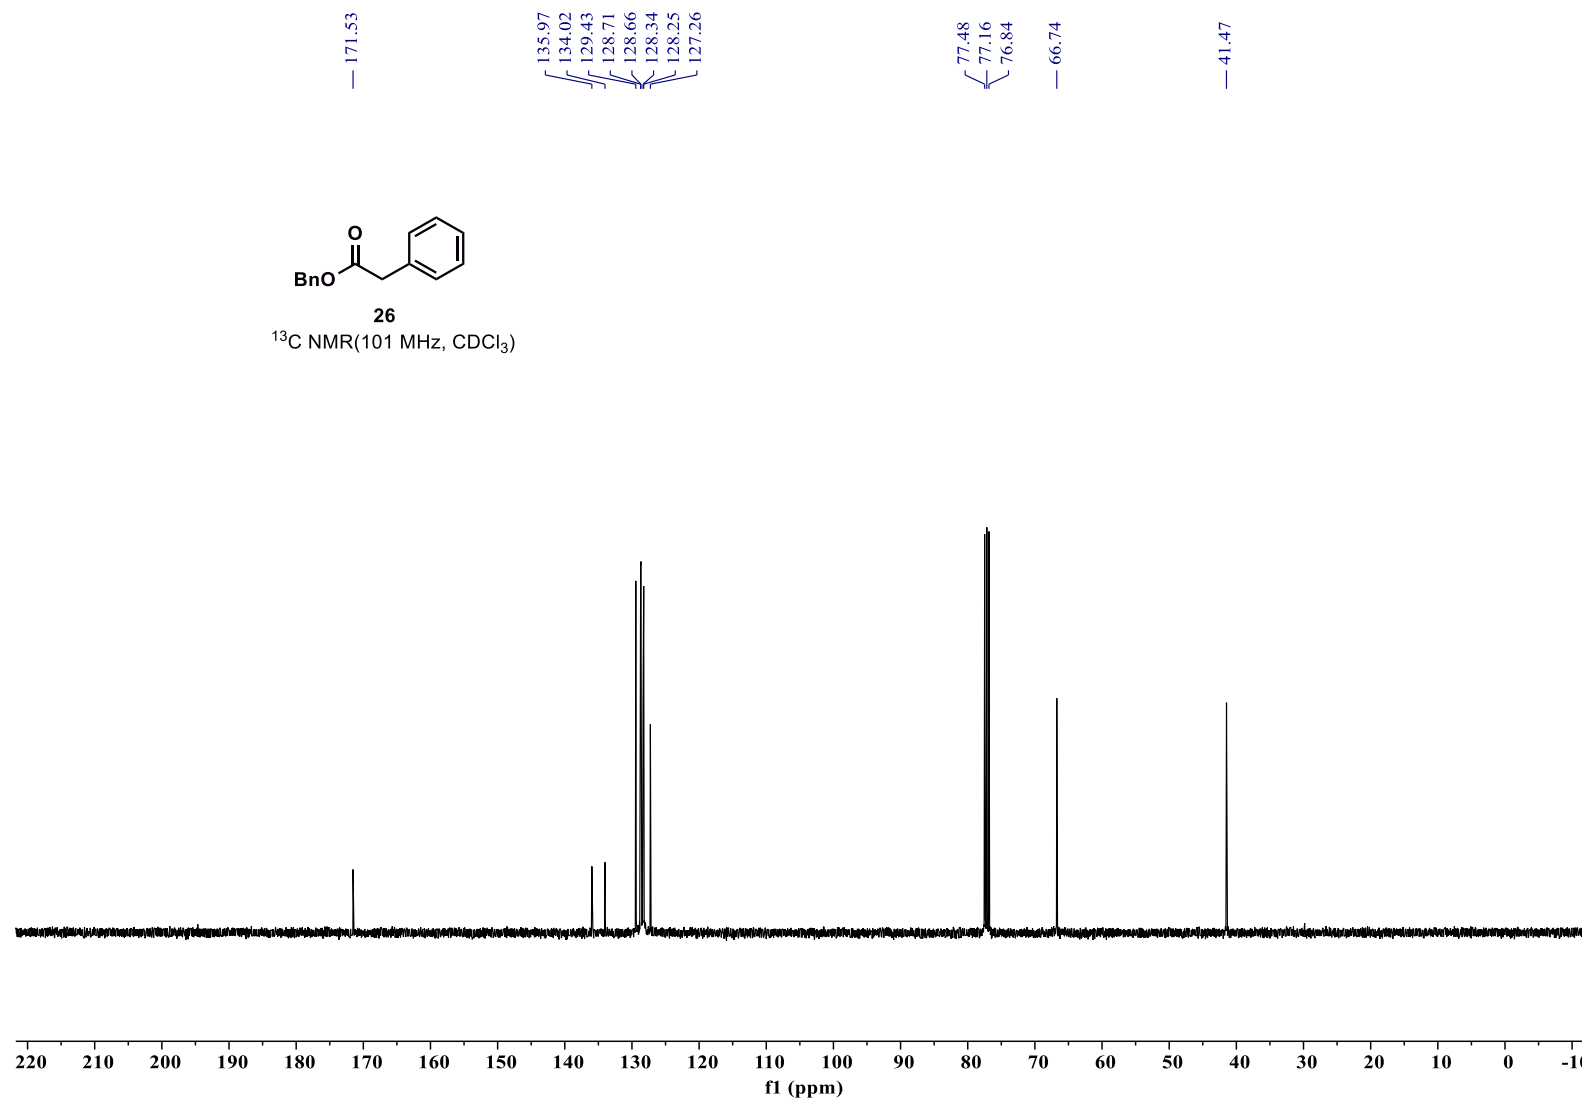

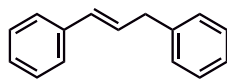

**27**

<sup>1</sup>H NMR(400 MHz, CDCl<sub>3</sub>)

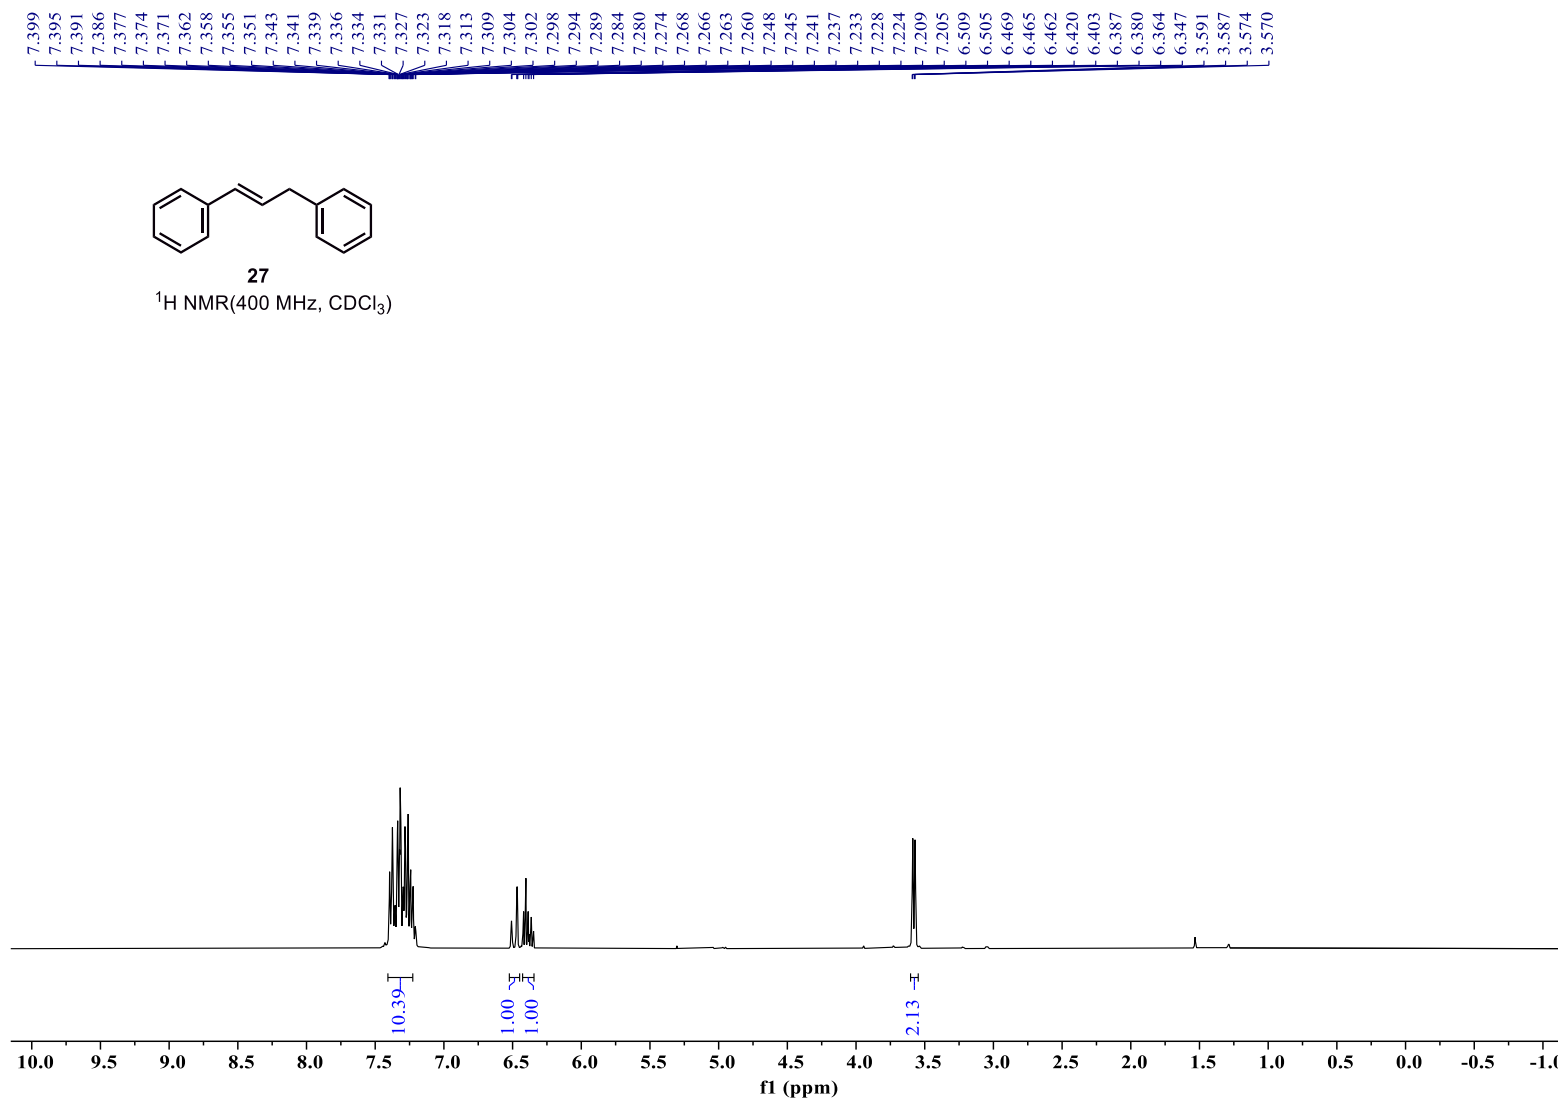

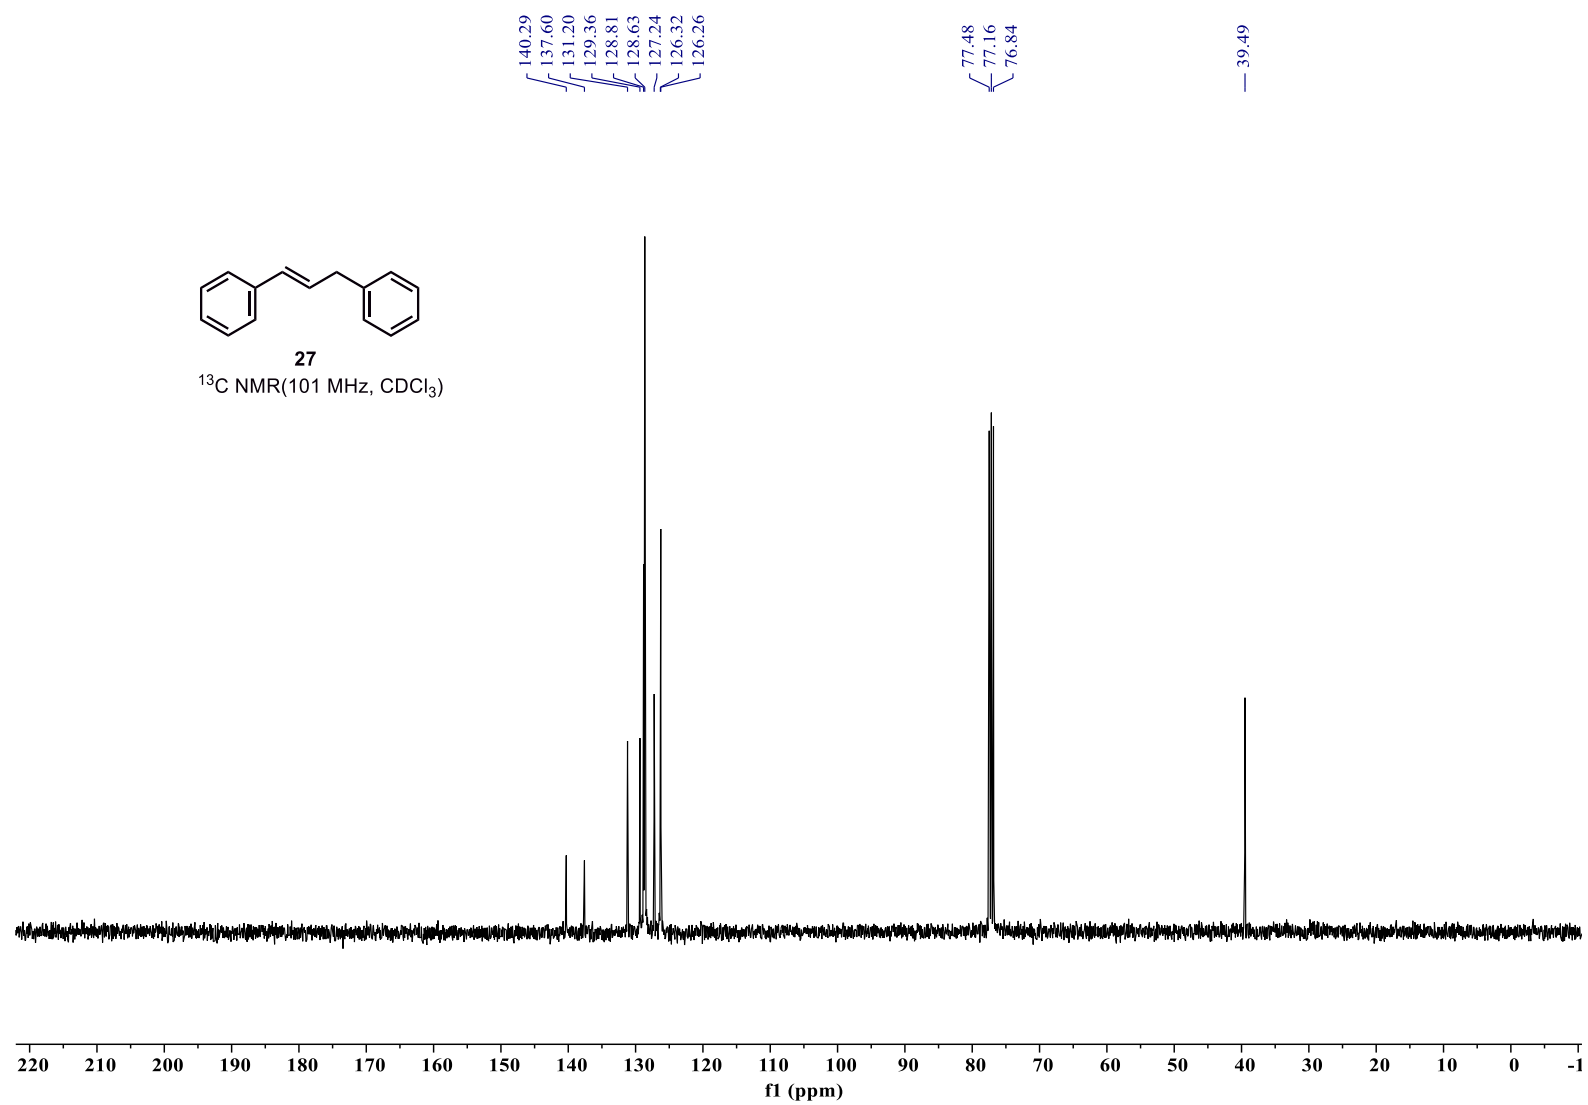

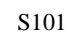

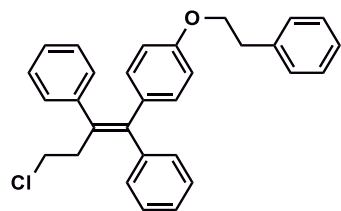

28

$^{13}\text{C}$  NMR (101 MHz,  $\text{CDCl}_3$ )

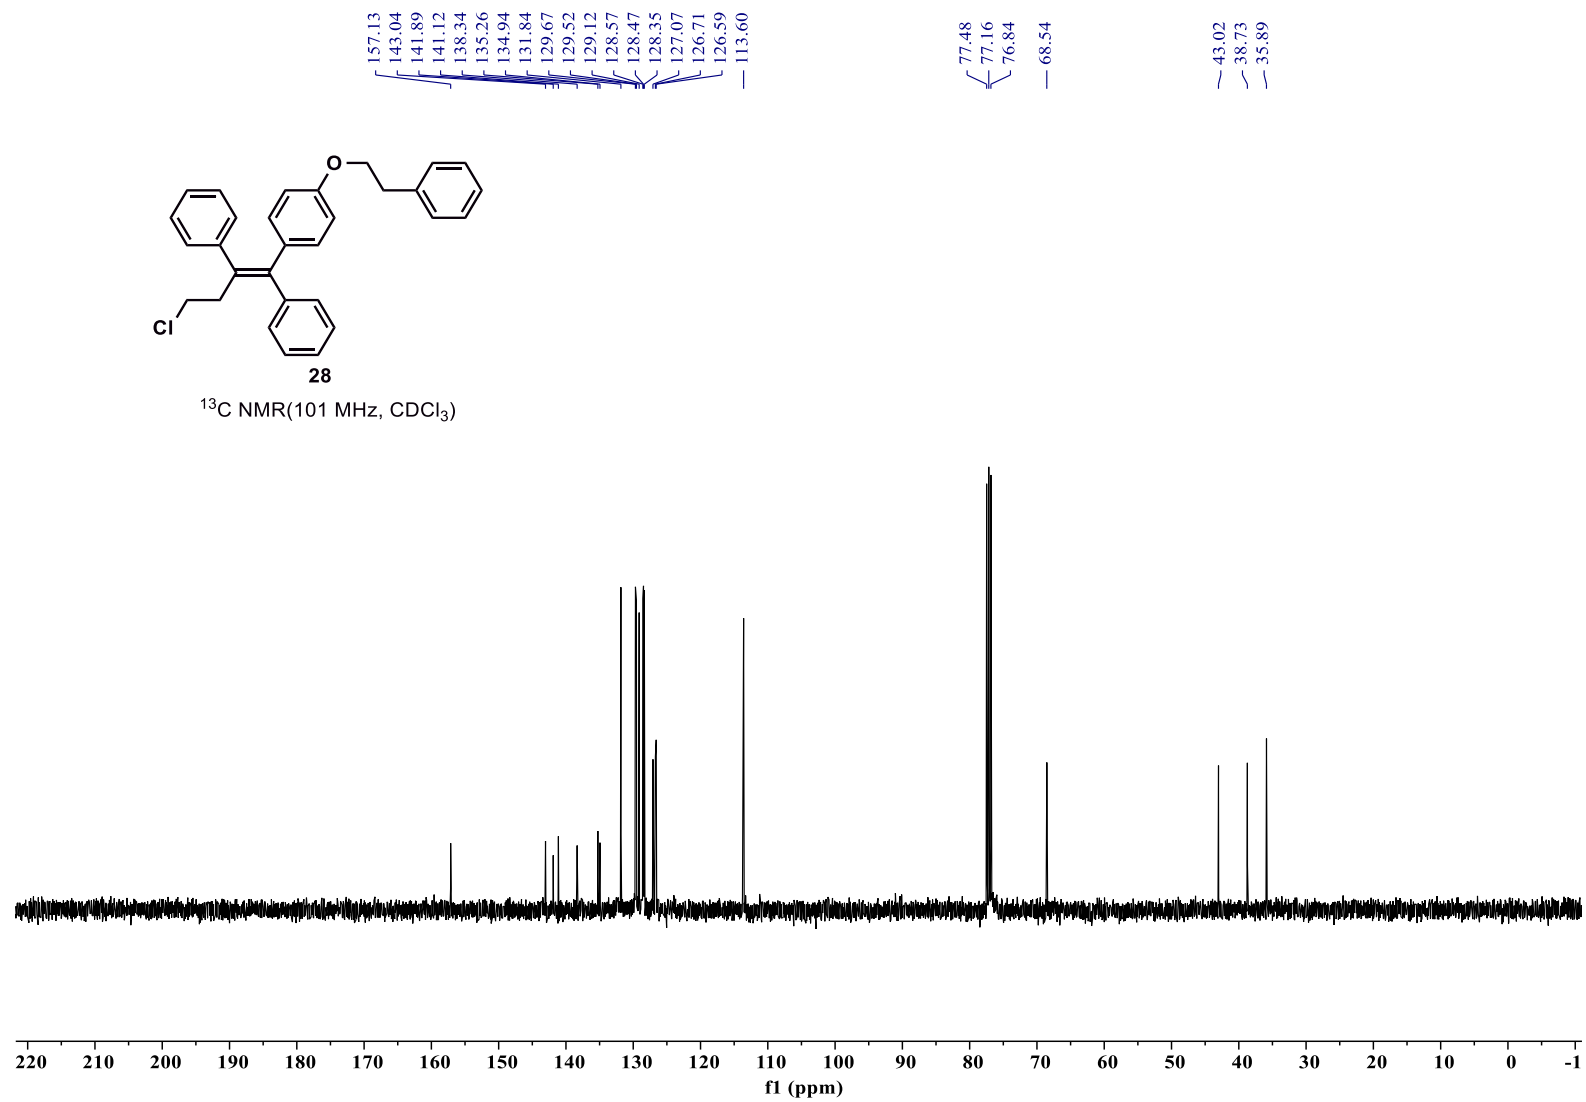

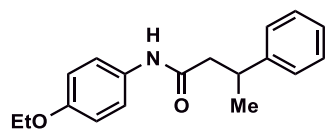

29  
<sup>1</sup>H NMR(400 MHz, CDCl<sub>3</sub>)

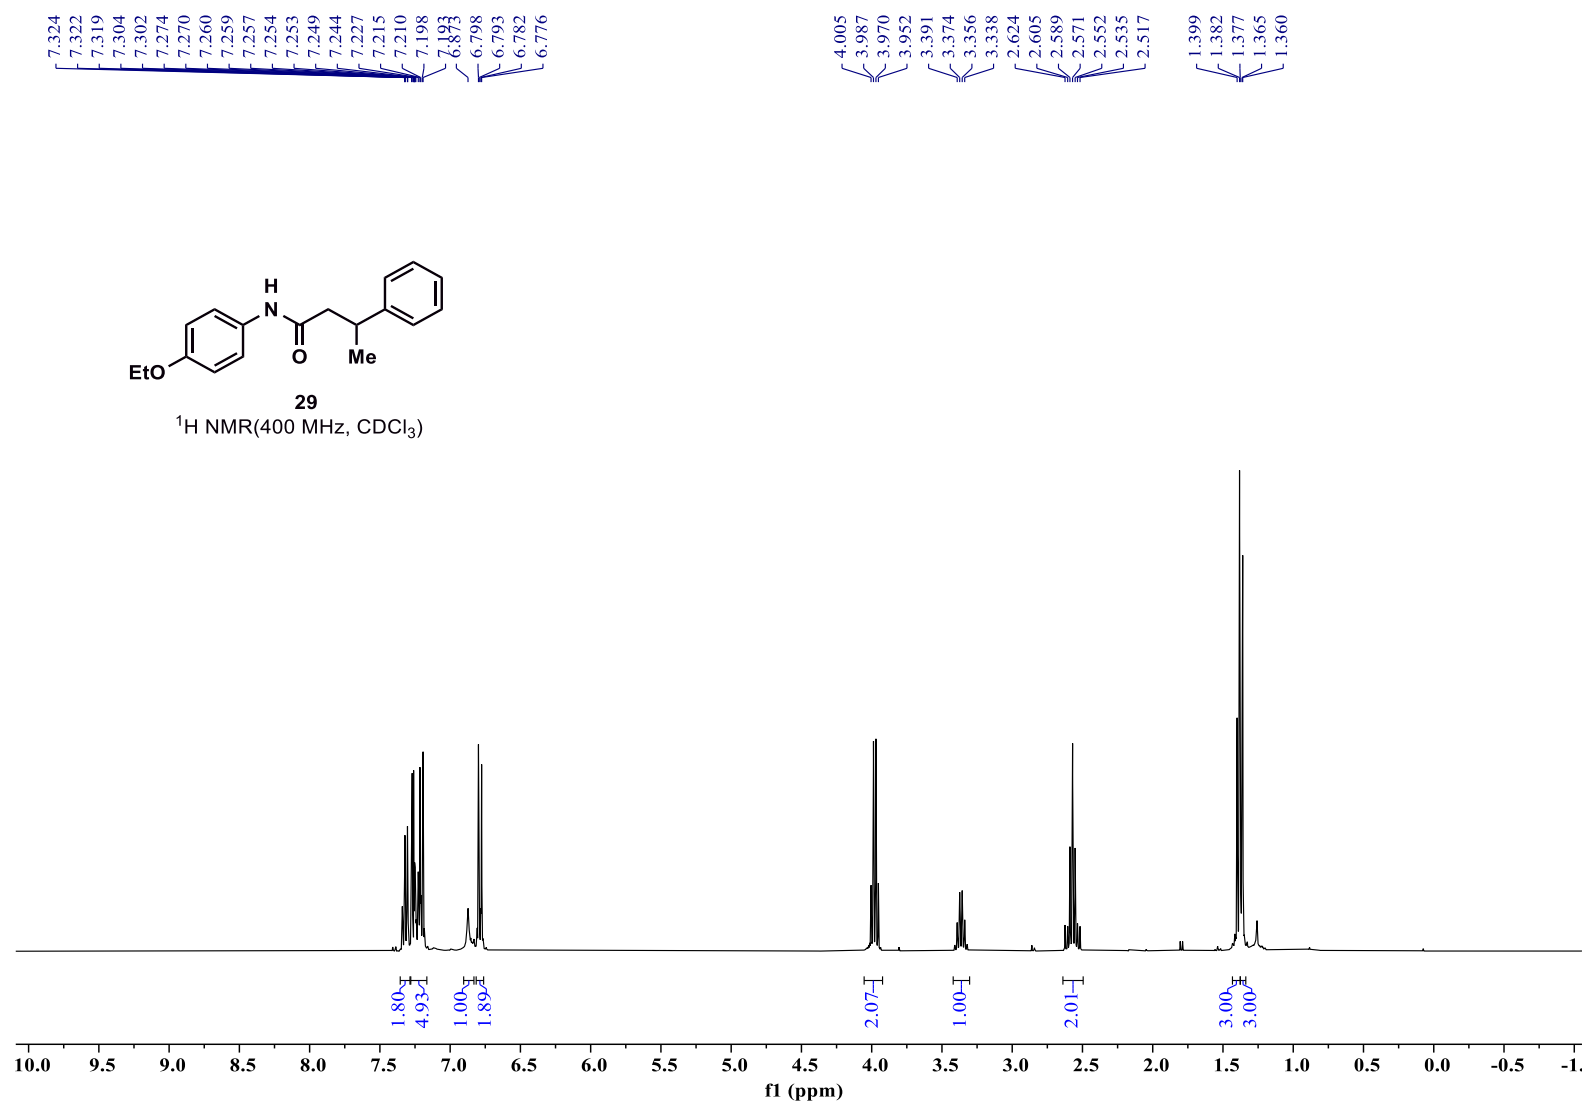

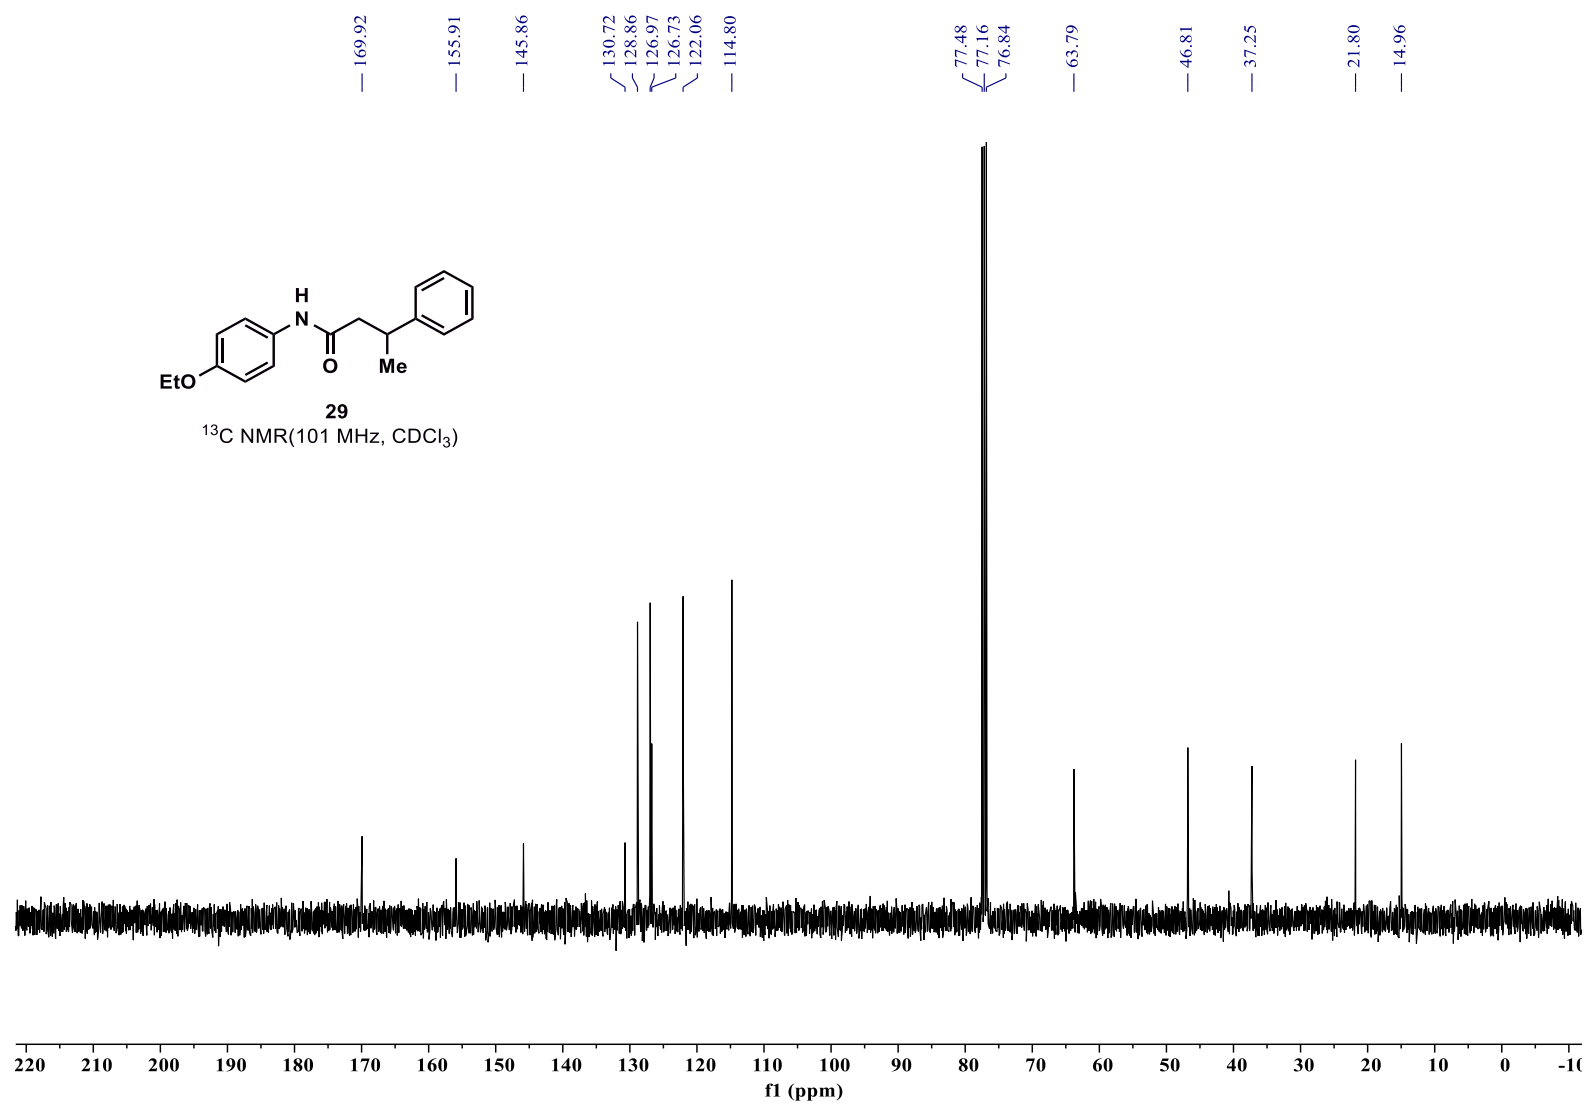

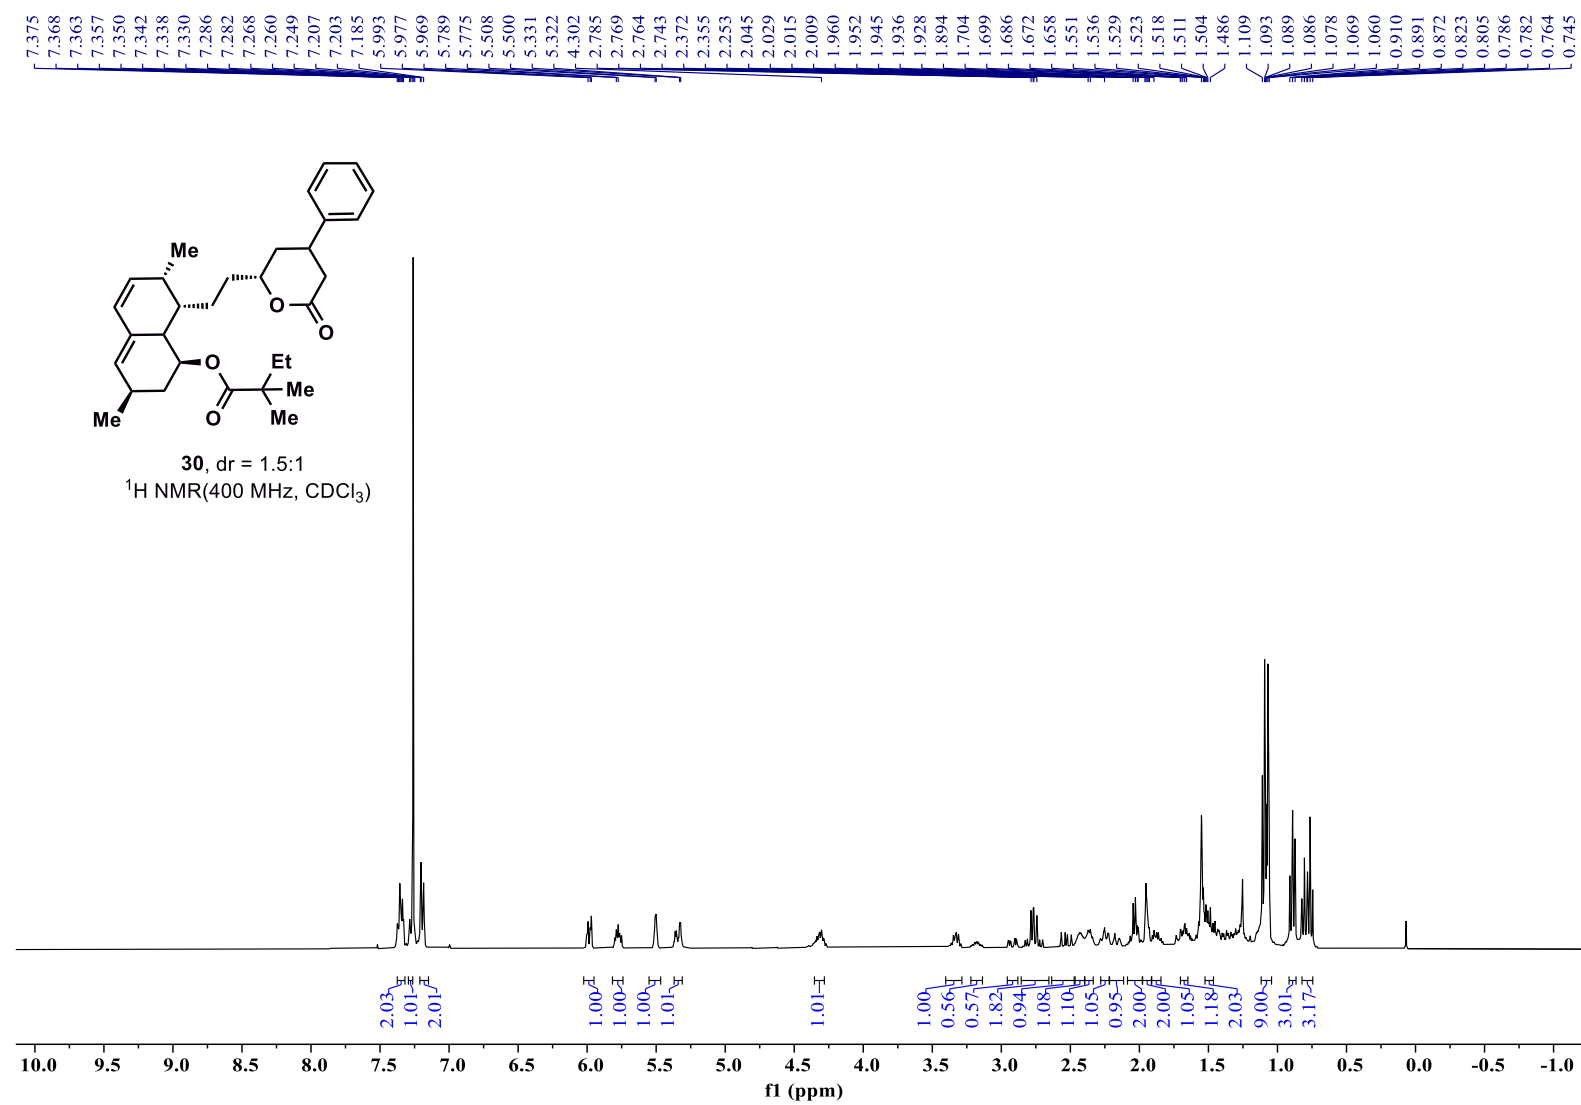

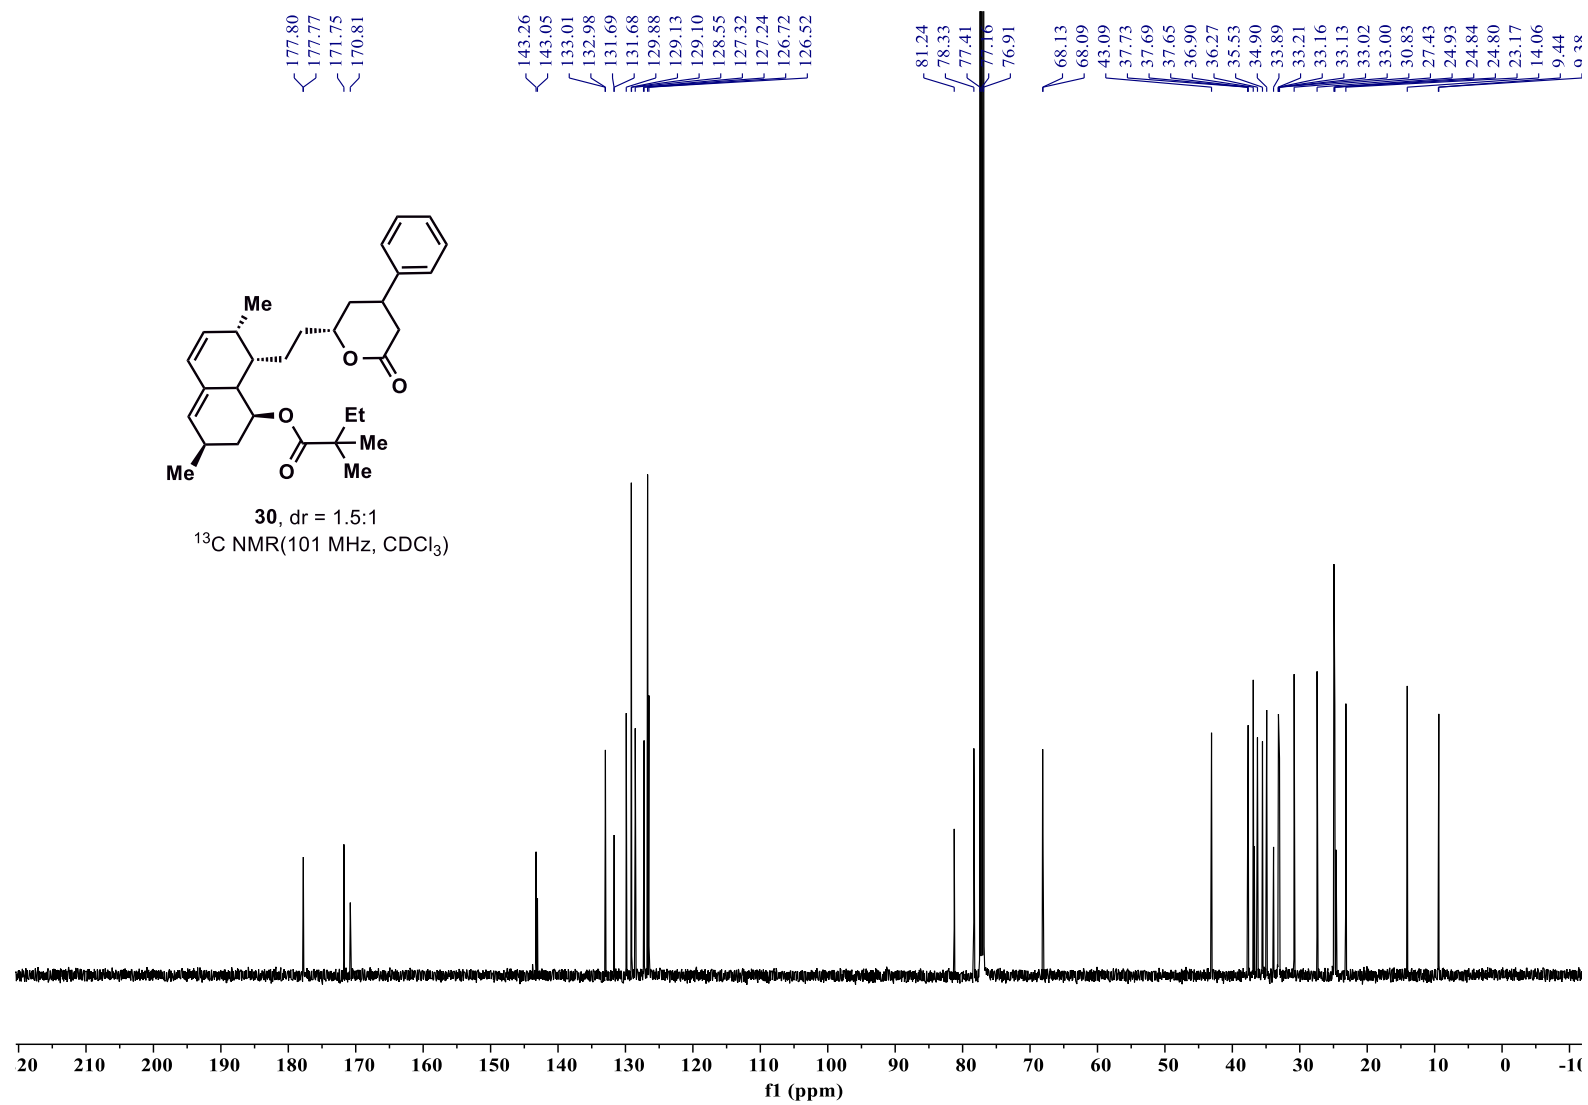

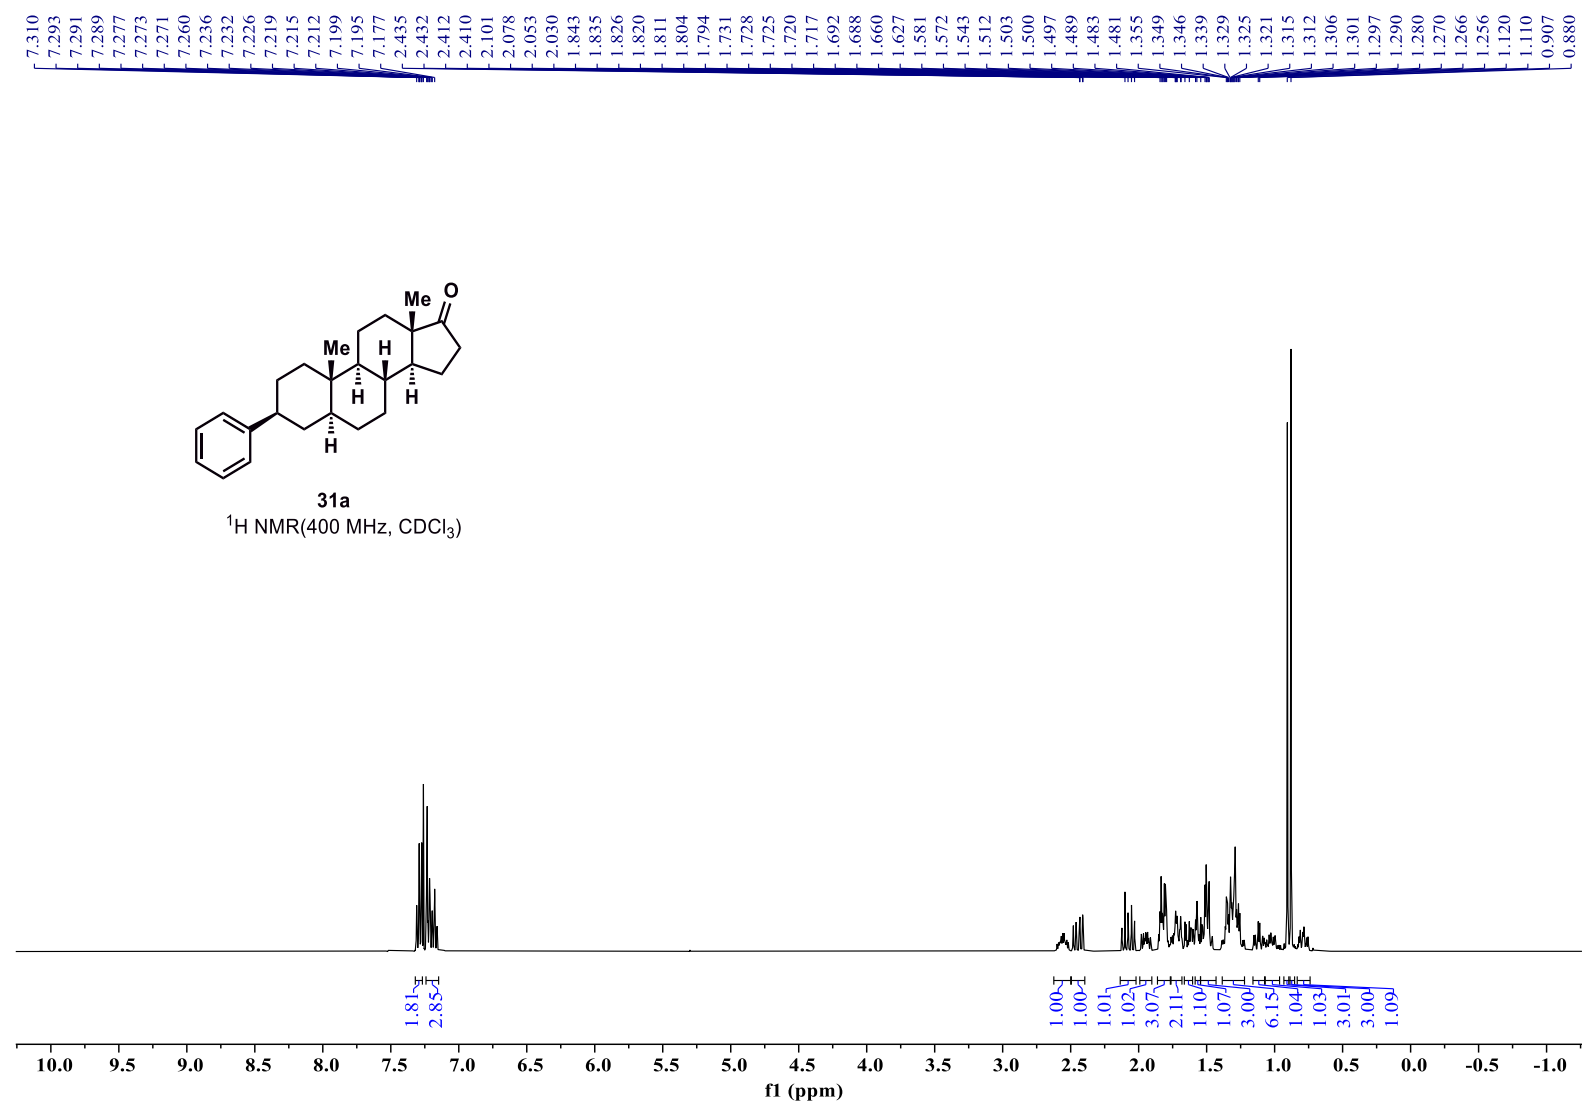

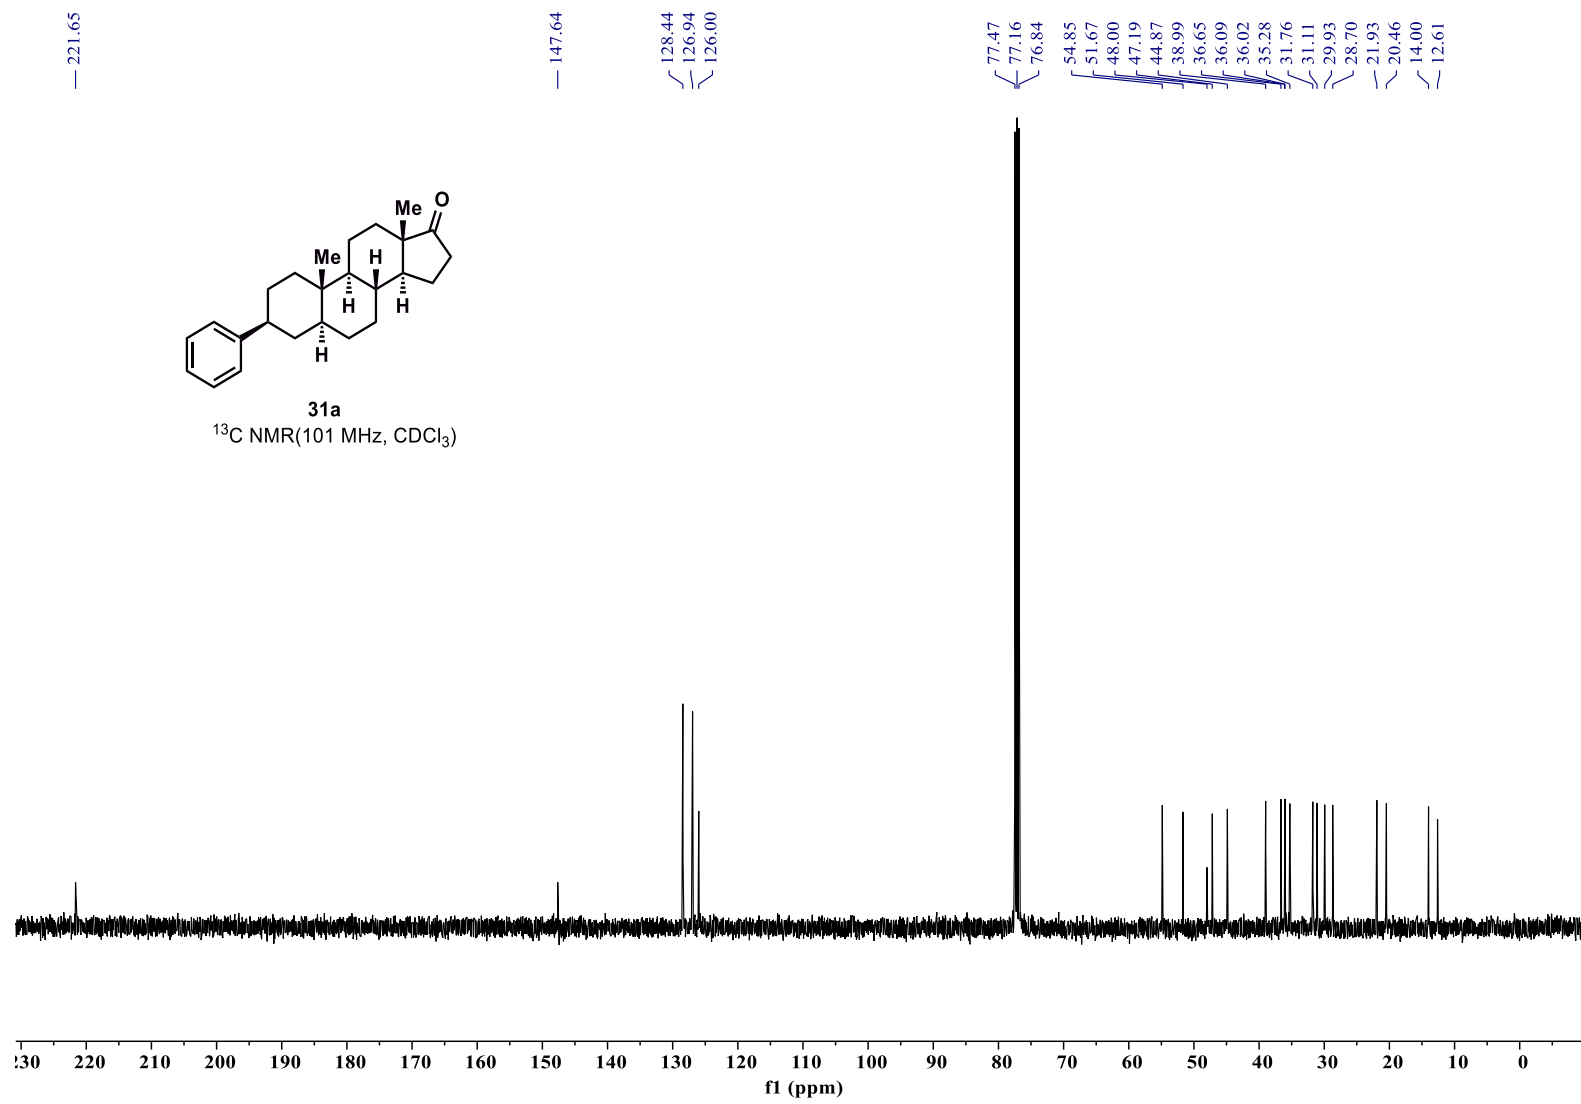

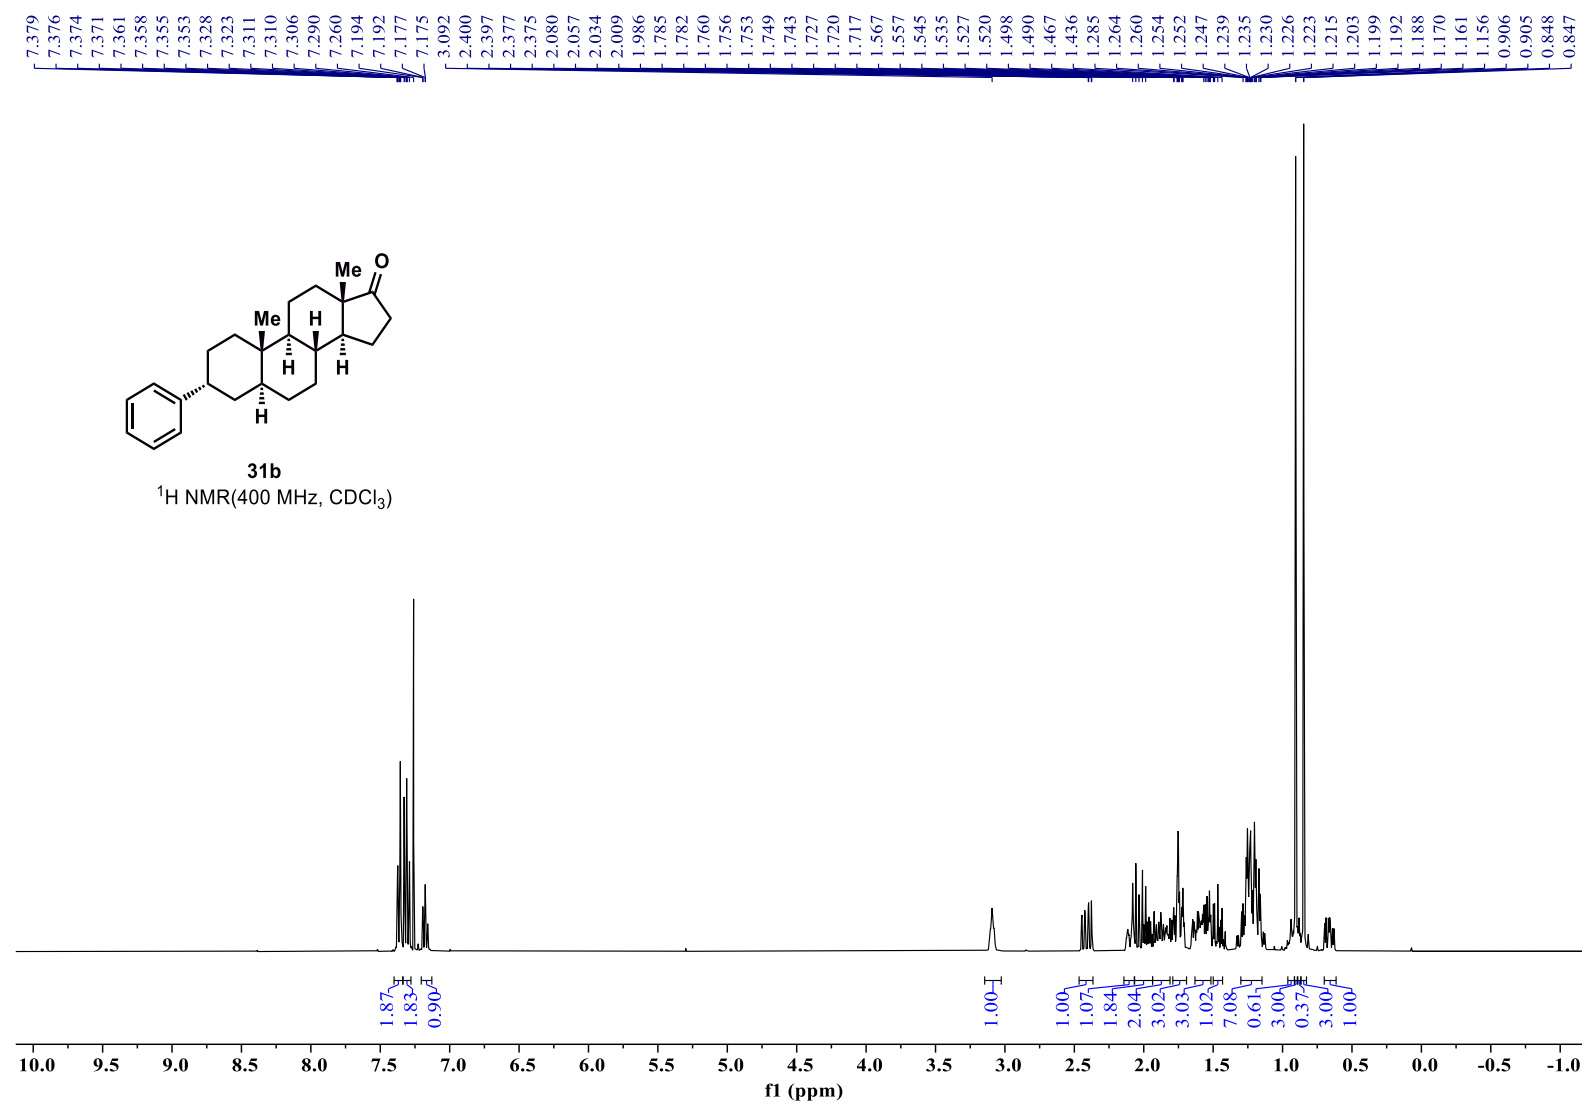

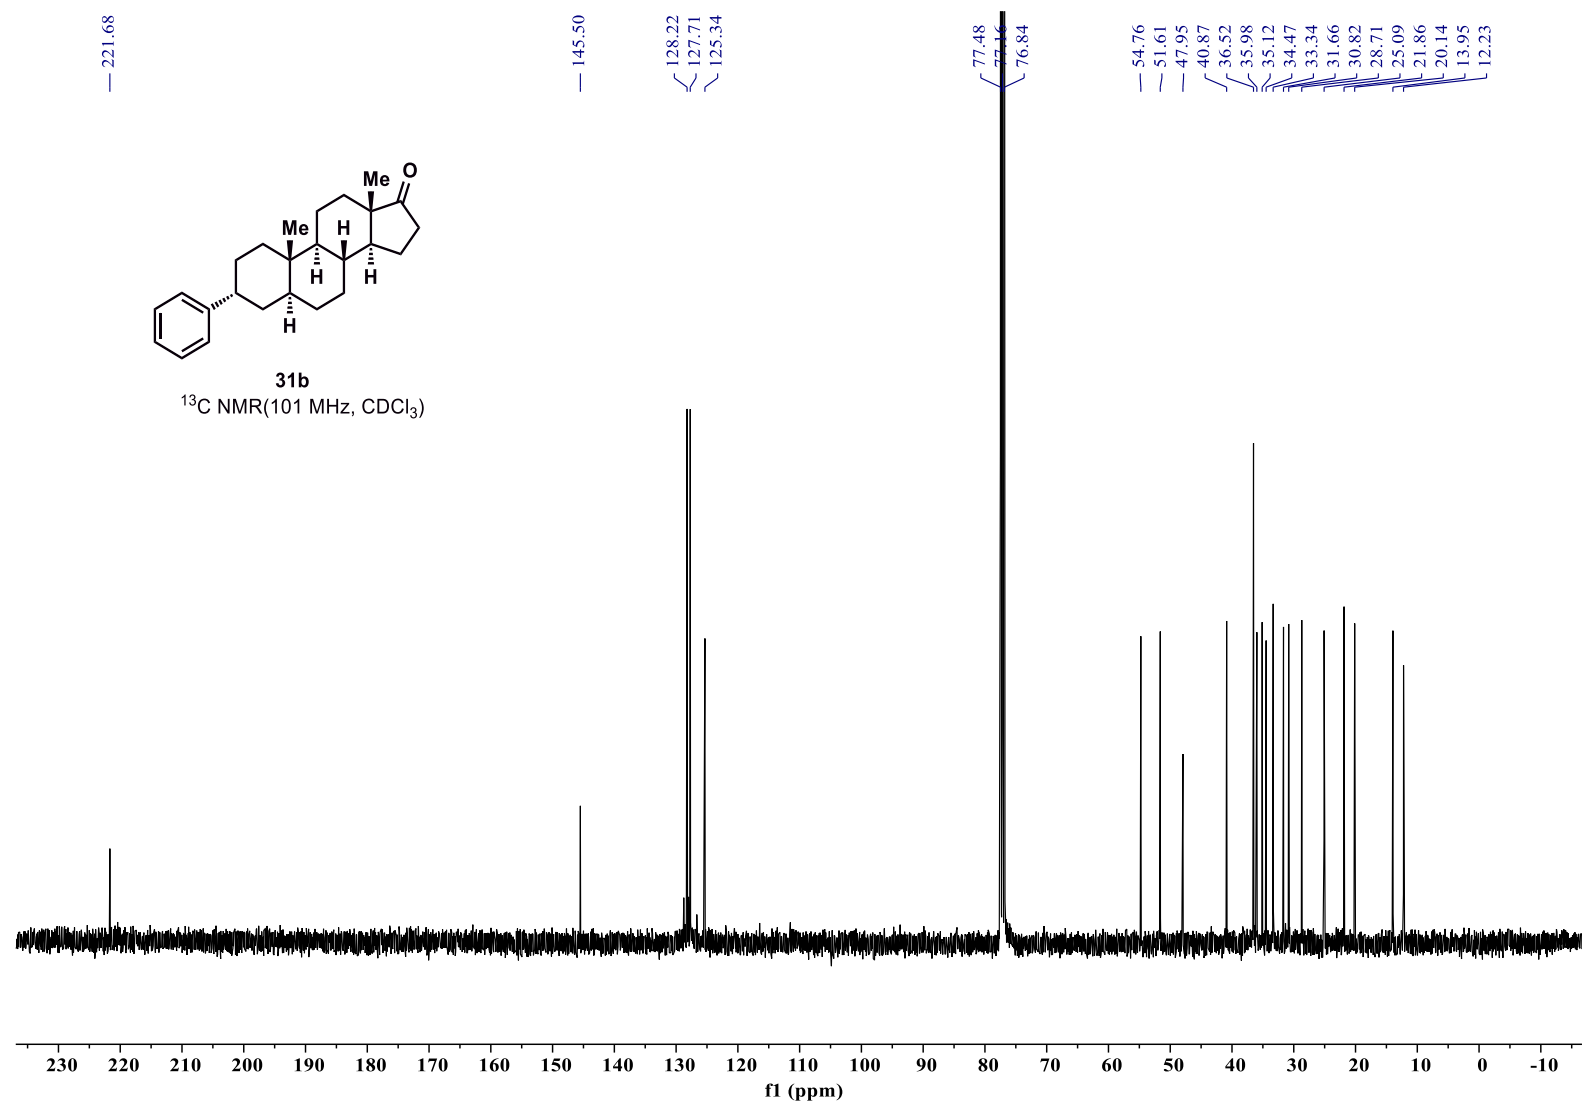

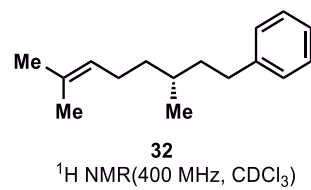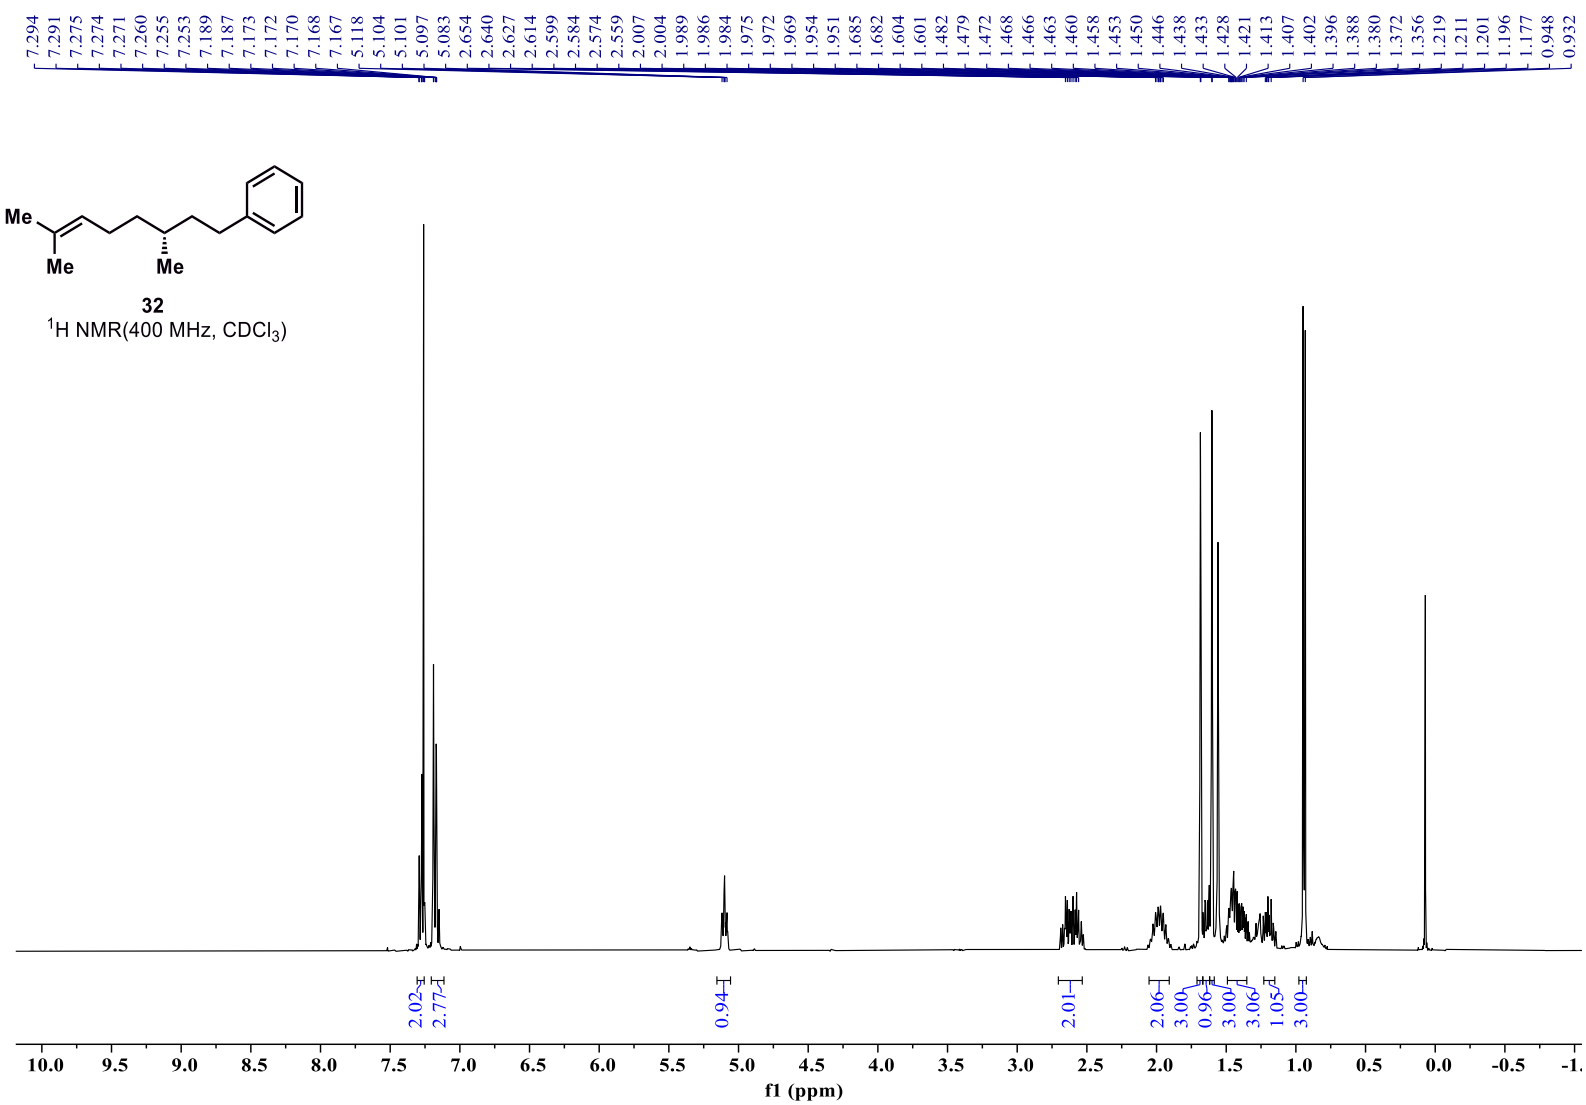

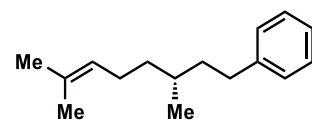

32

$^{13}\text{C}$  NMR (101 MHz,  $\text{CDCl}_3$ )

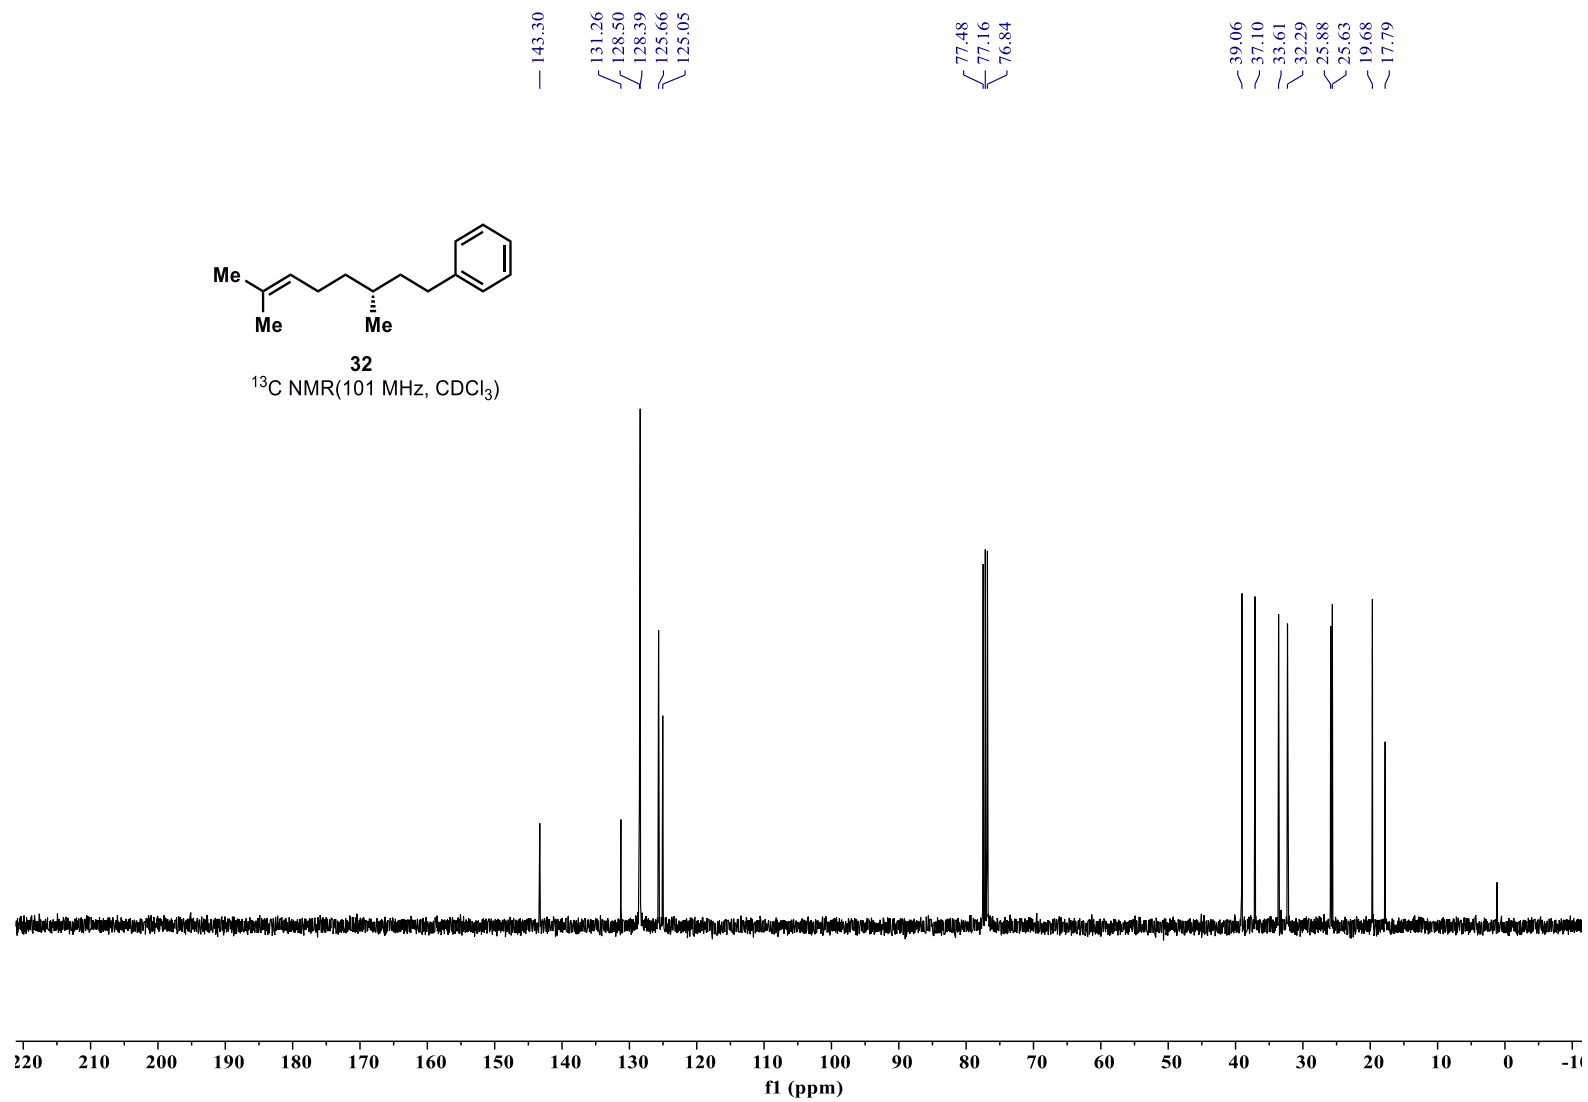

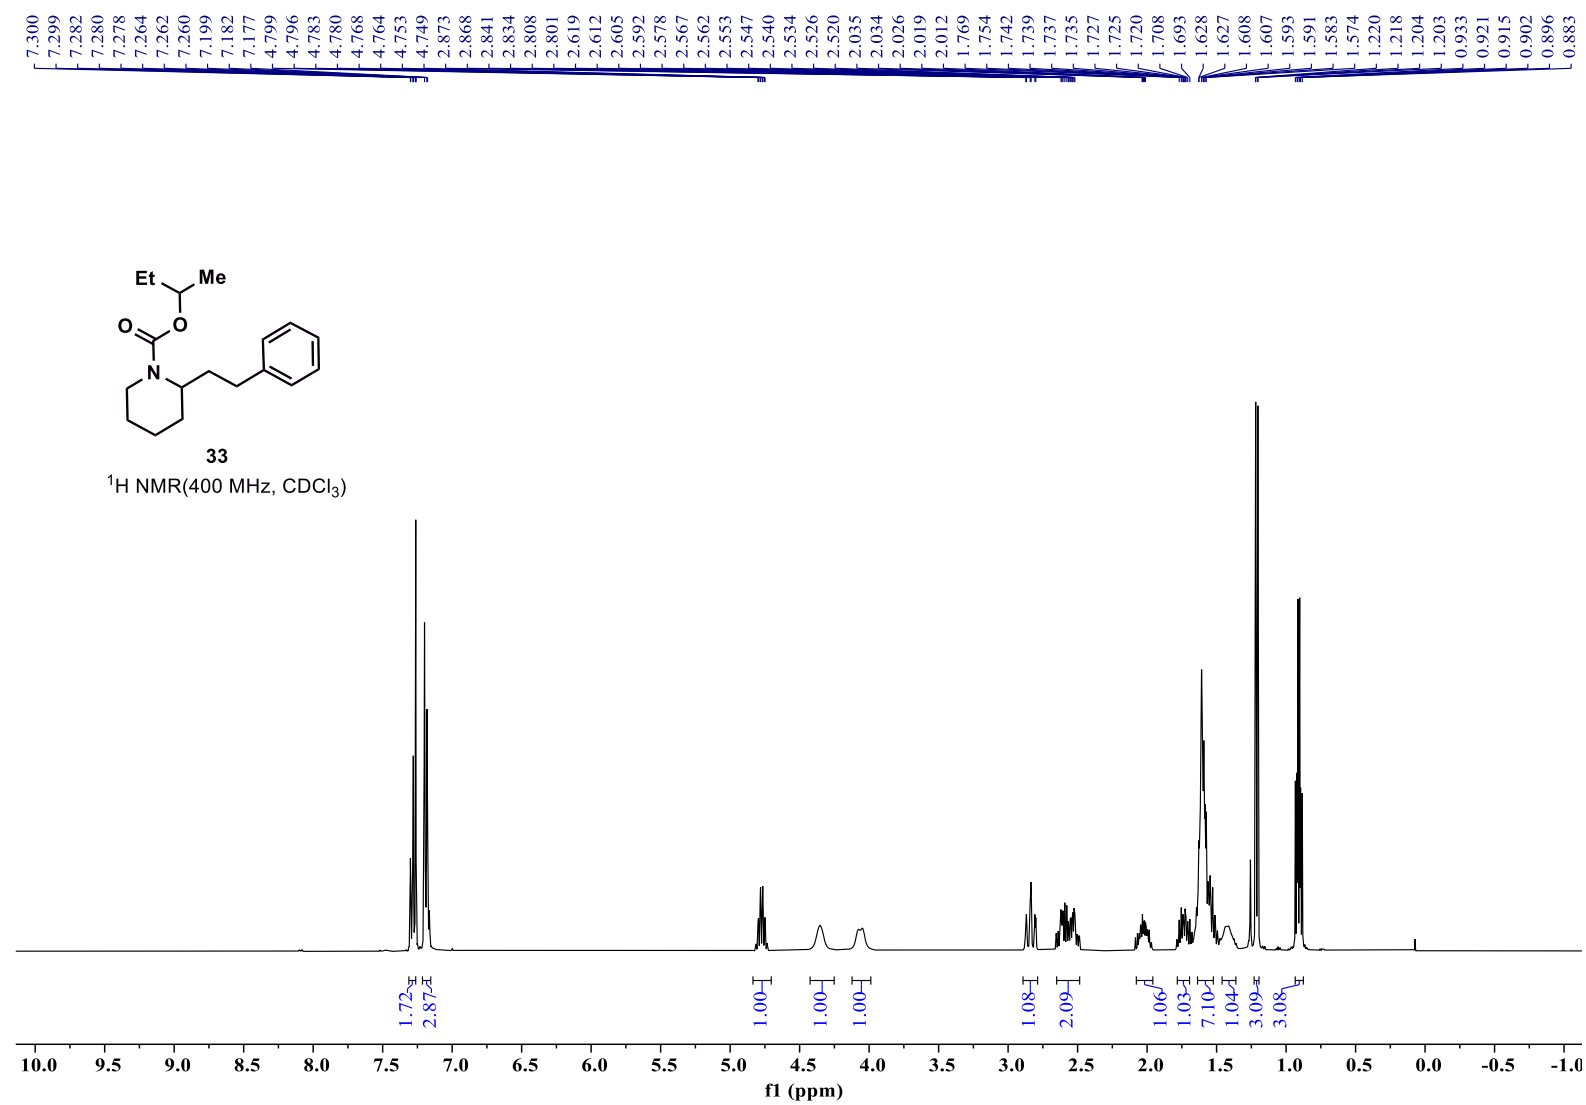

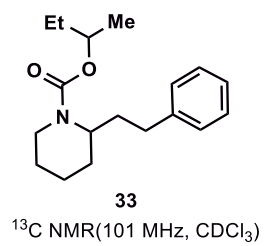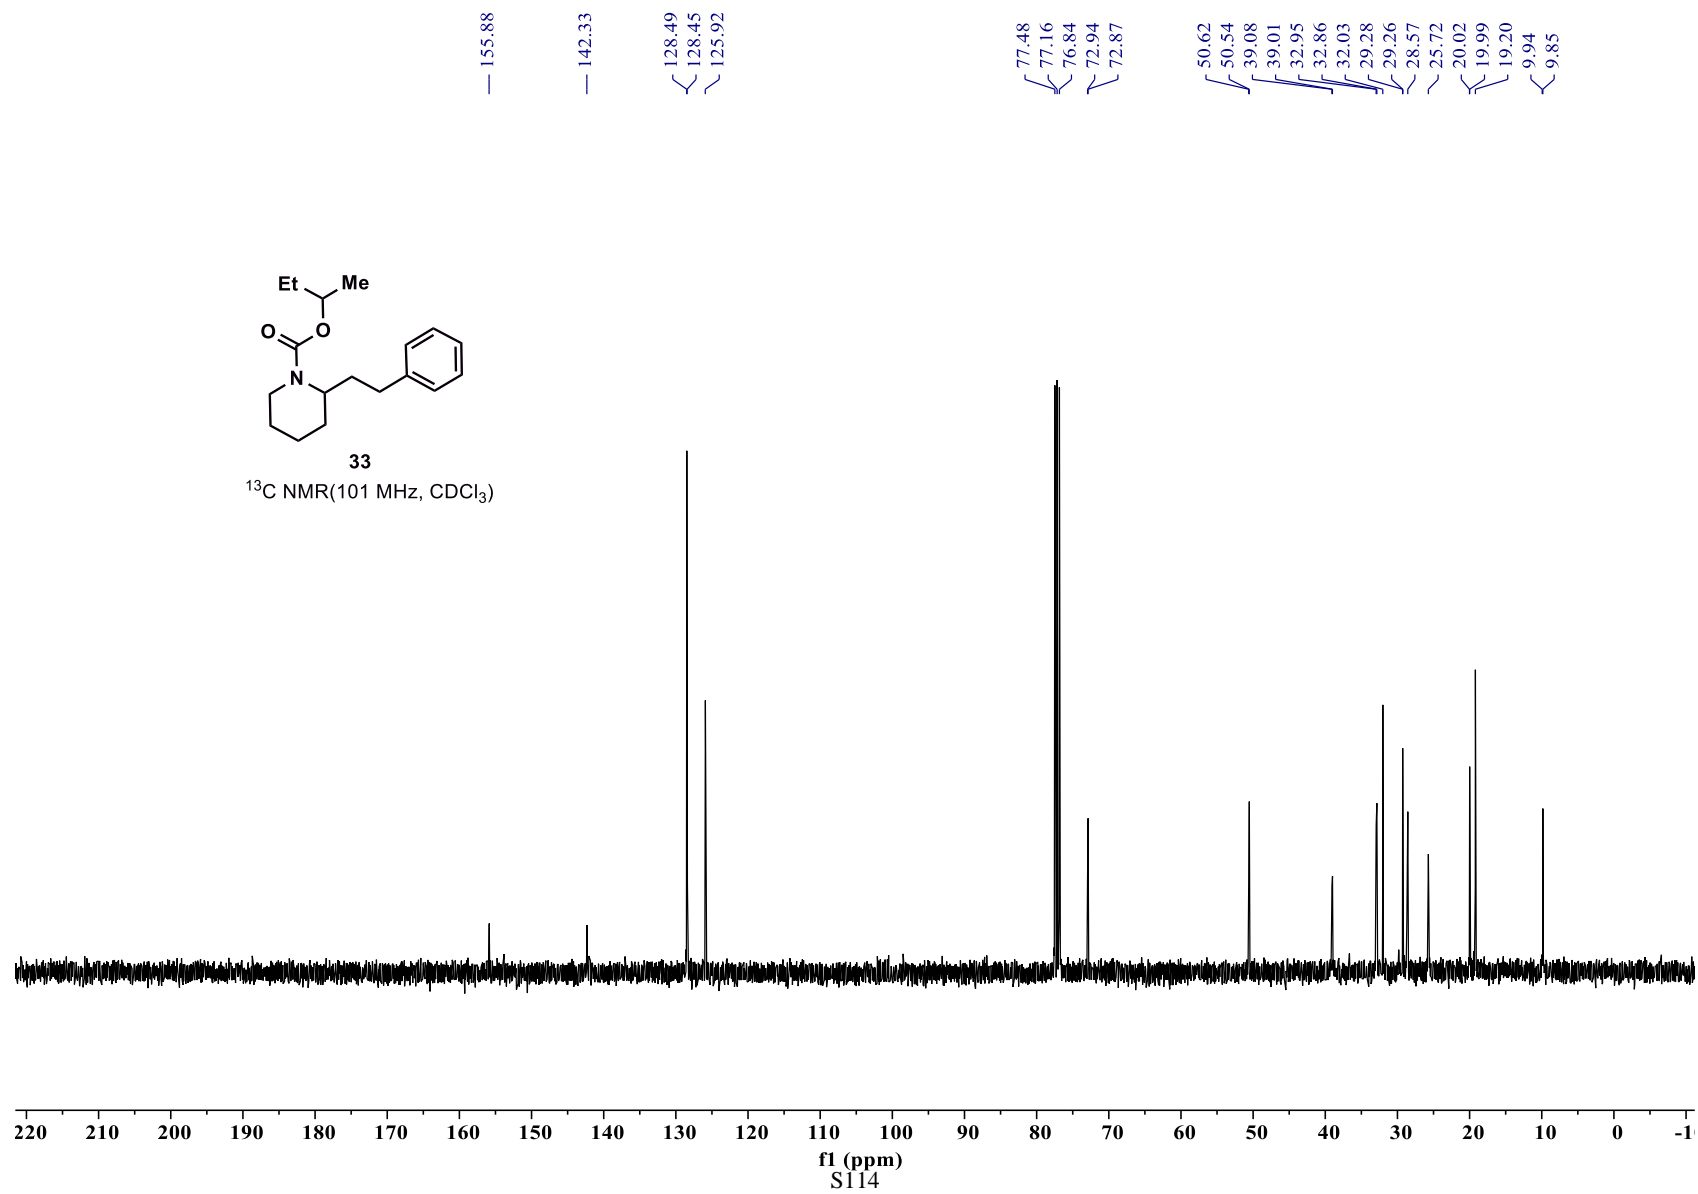

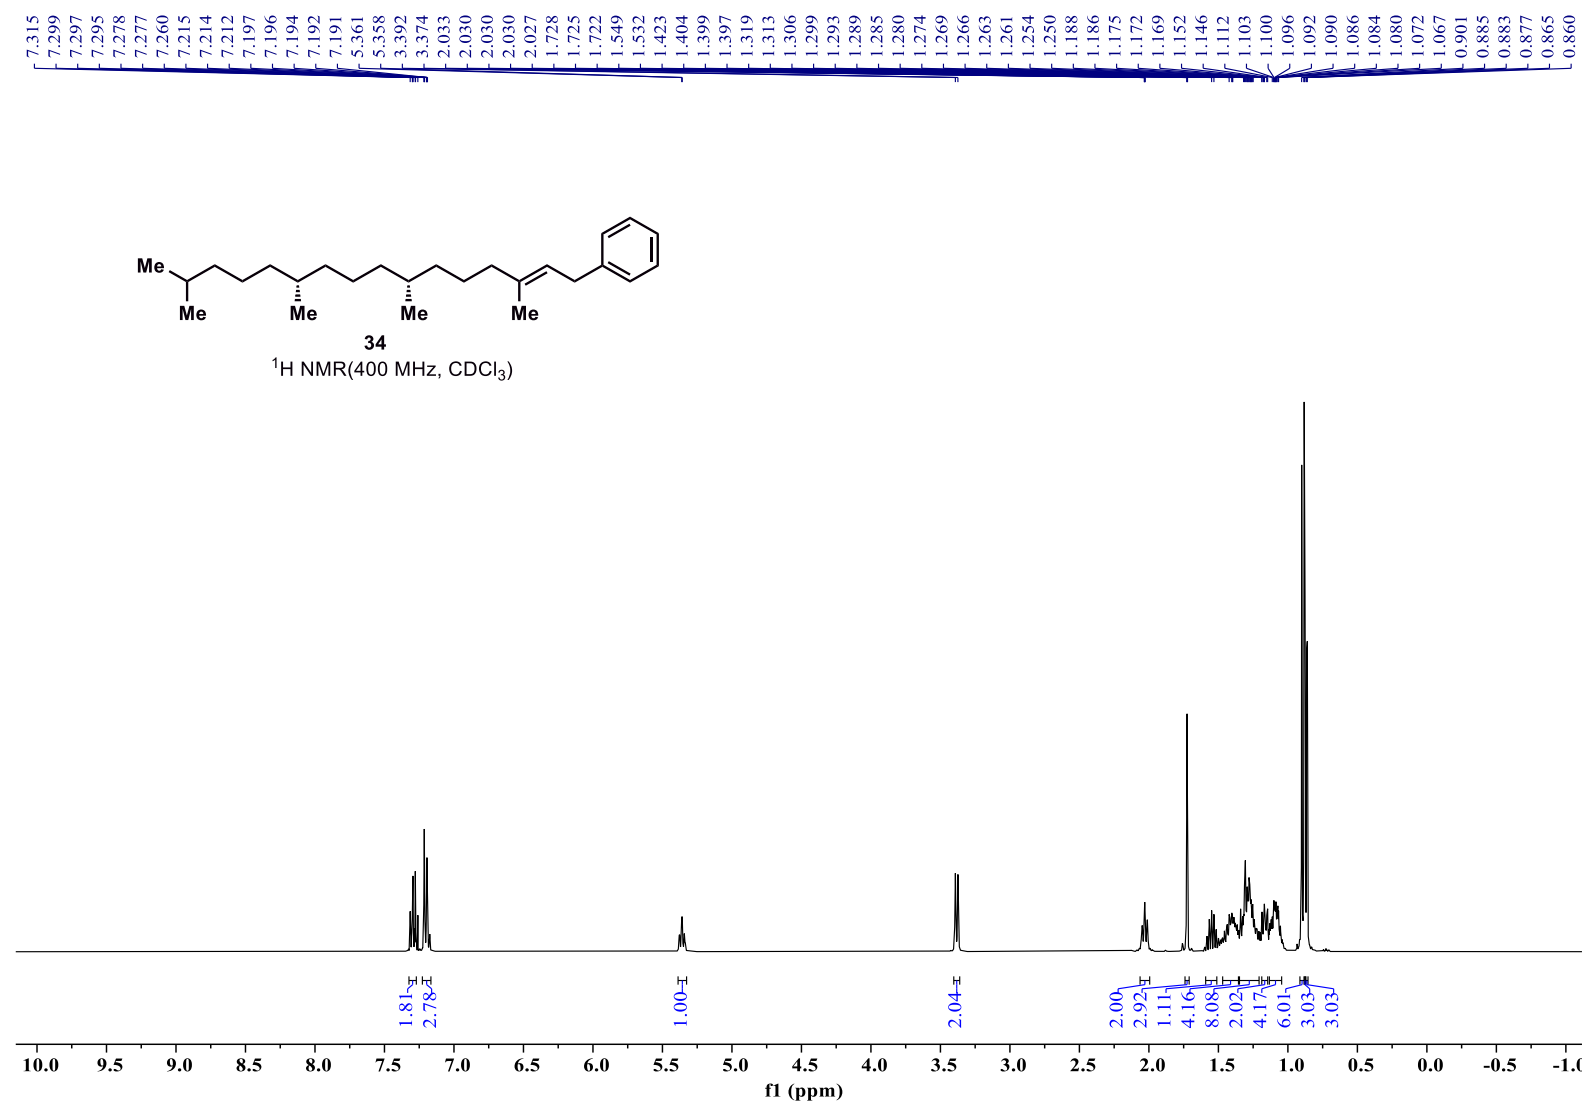

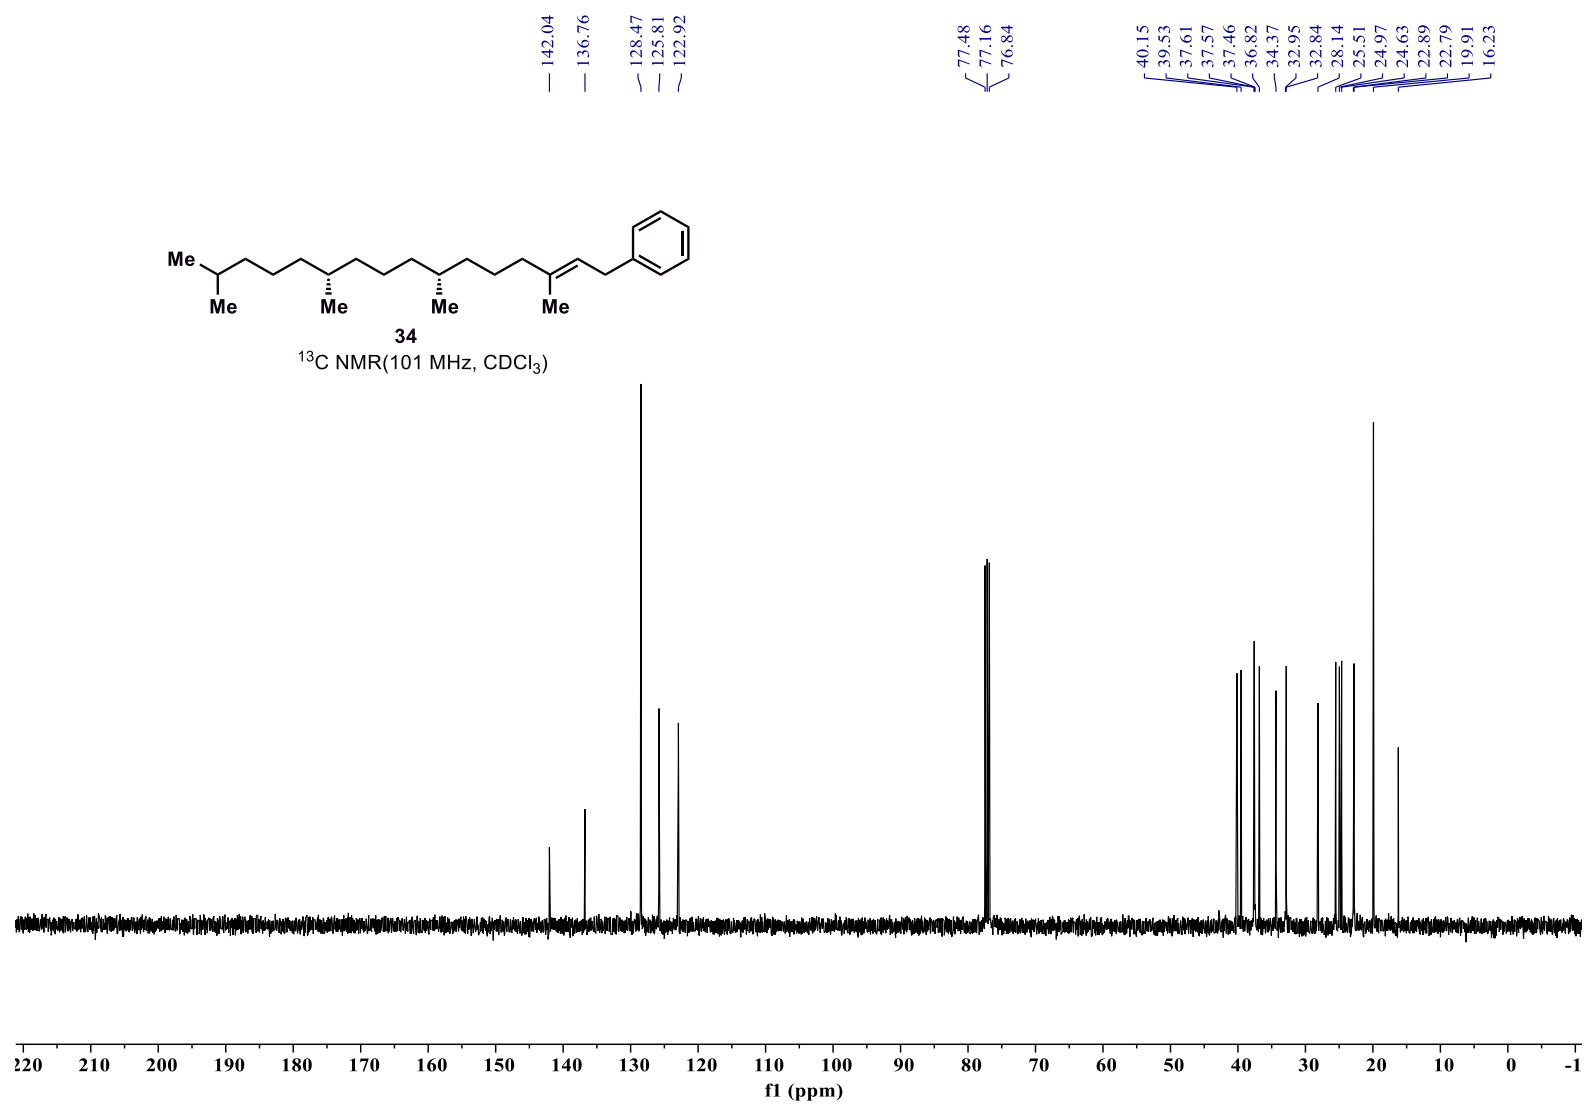

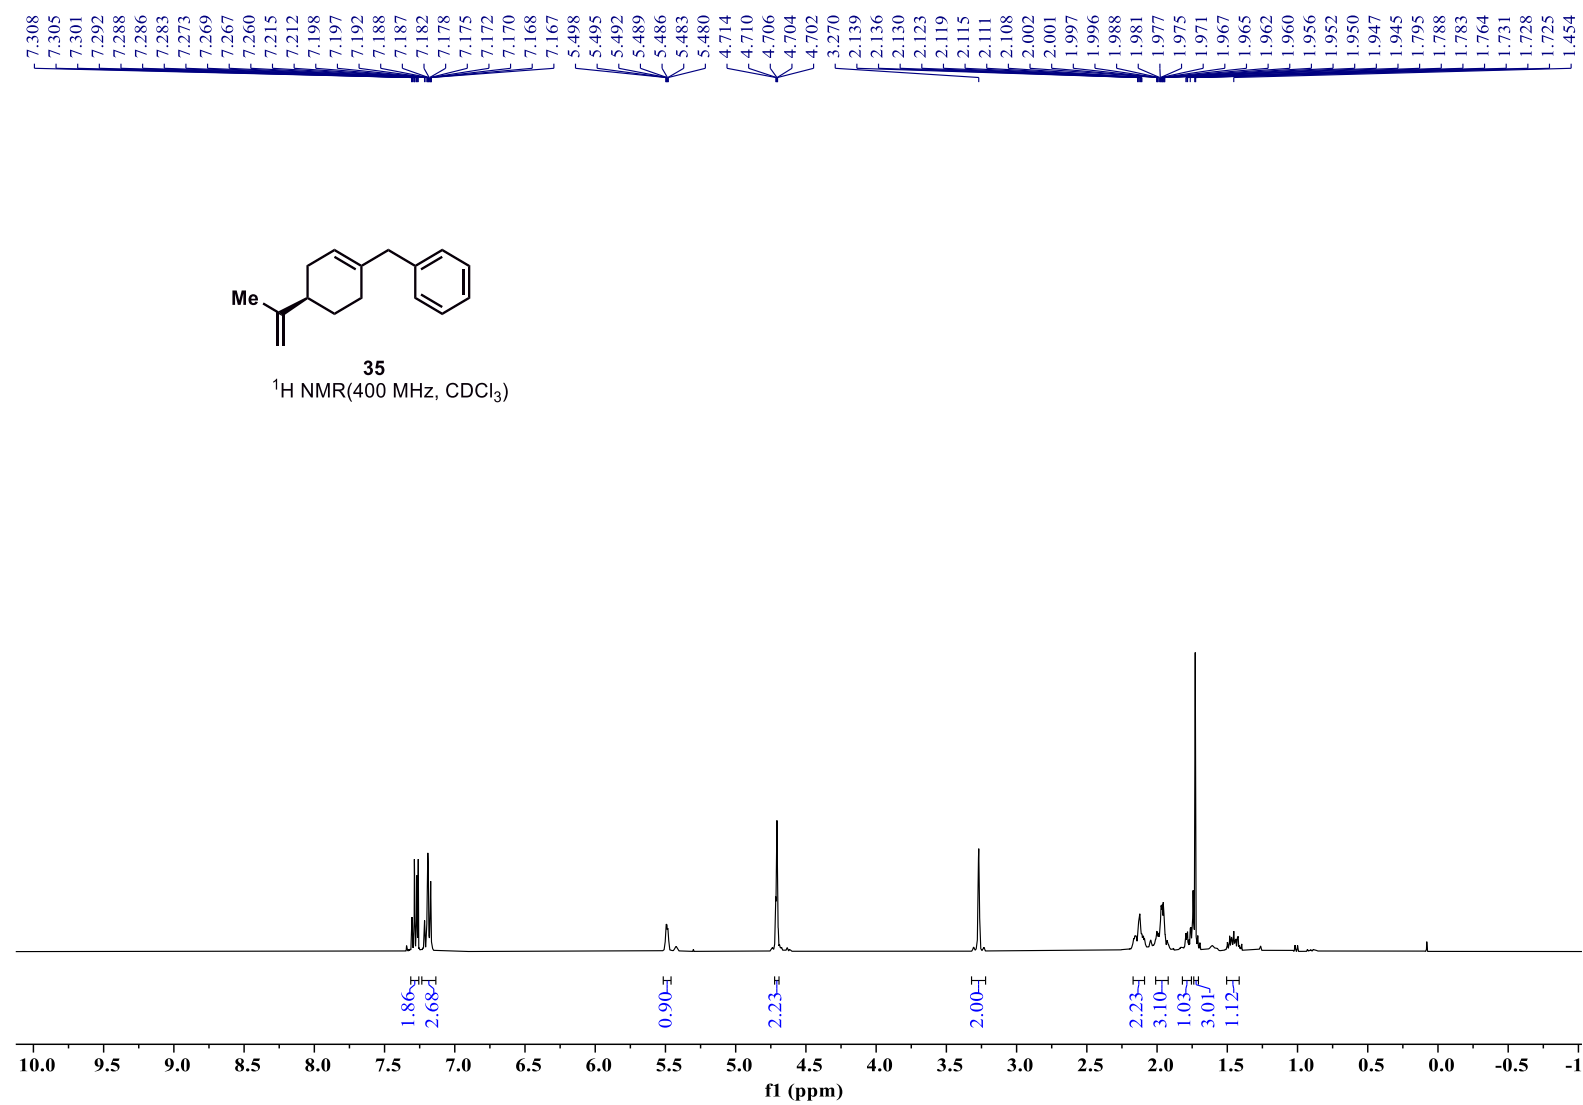

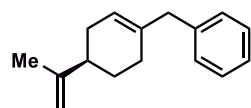

**35**

$^{13}\text{C}$  NMR (101 MHz,  $\text{CDCl}_3$ )

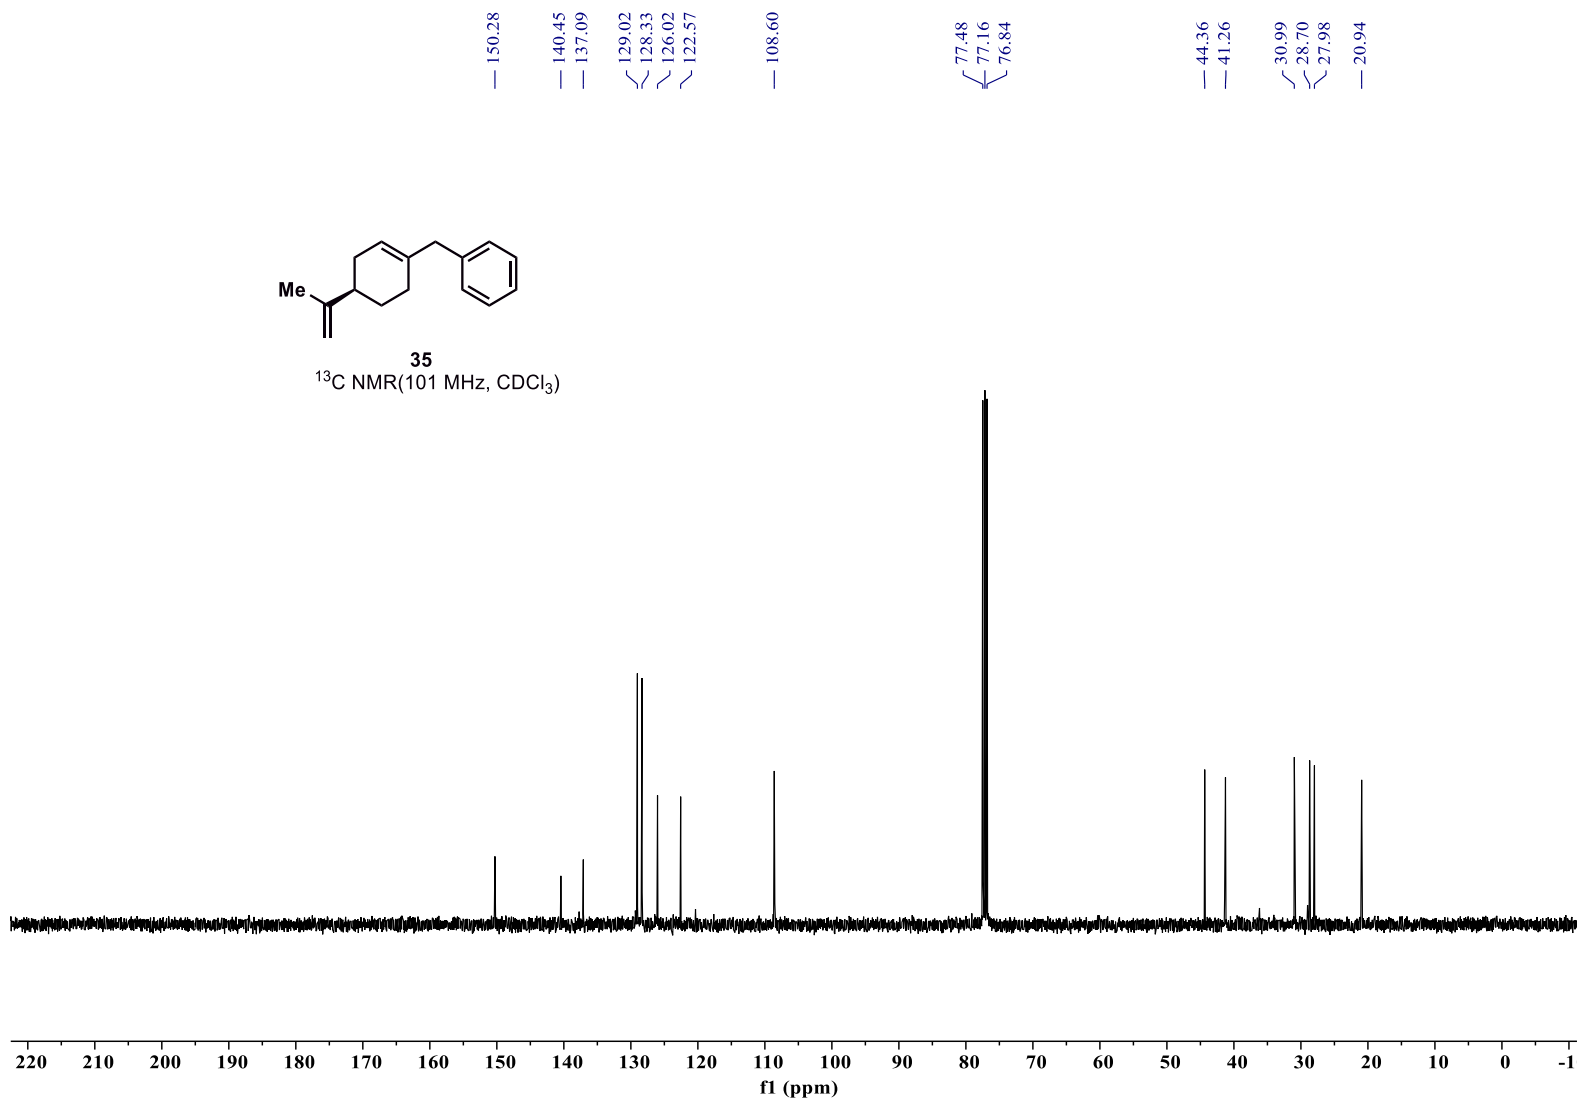

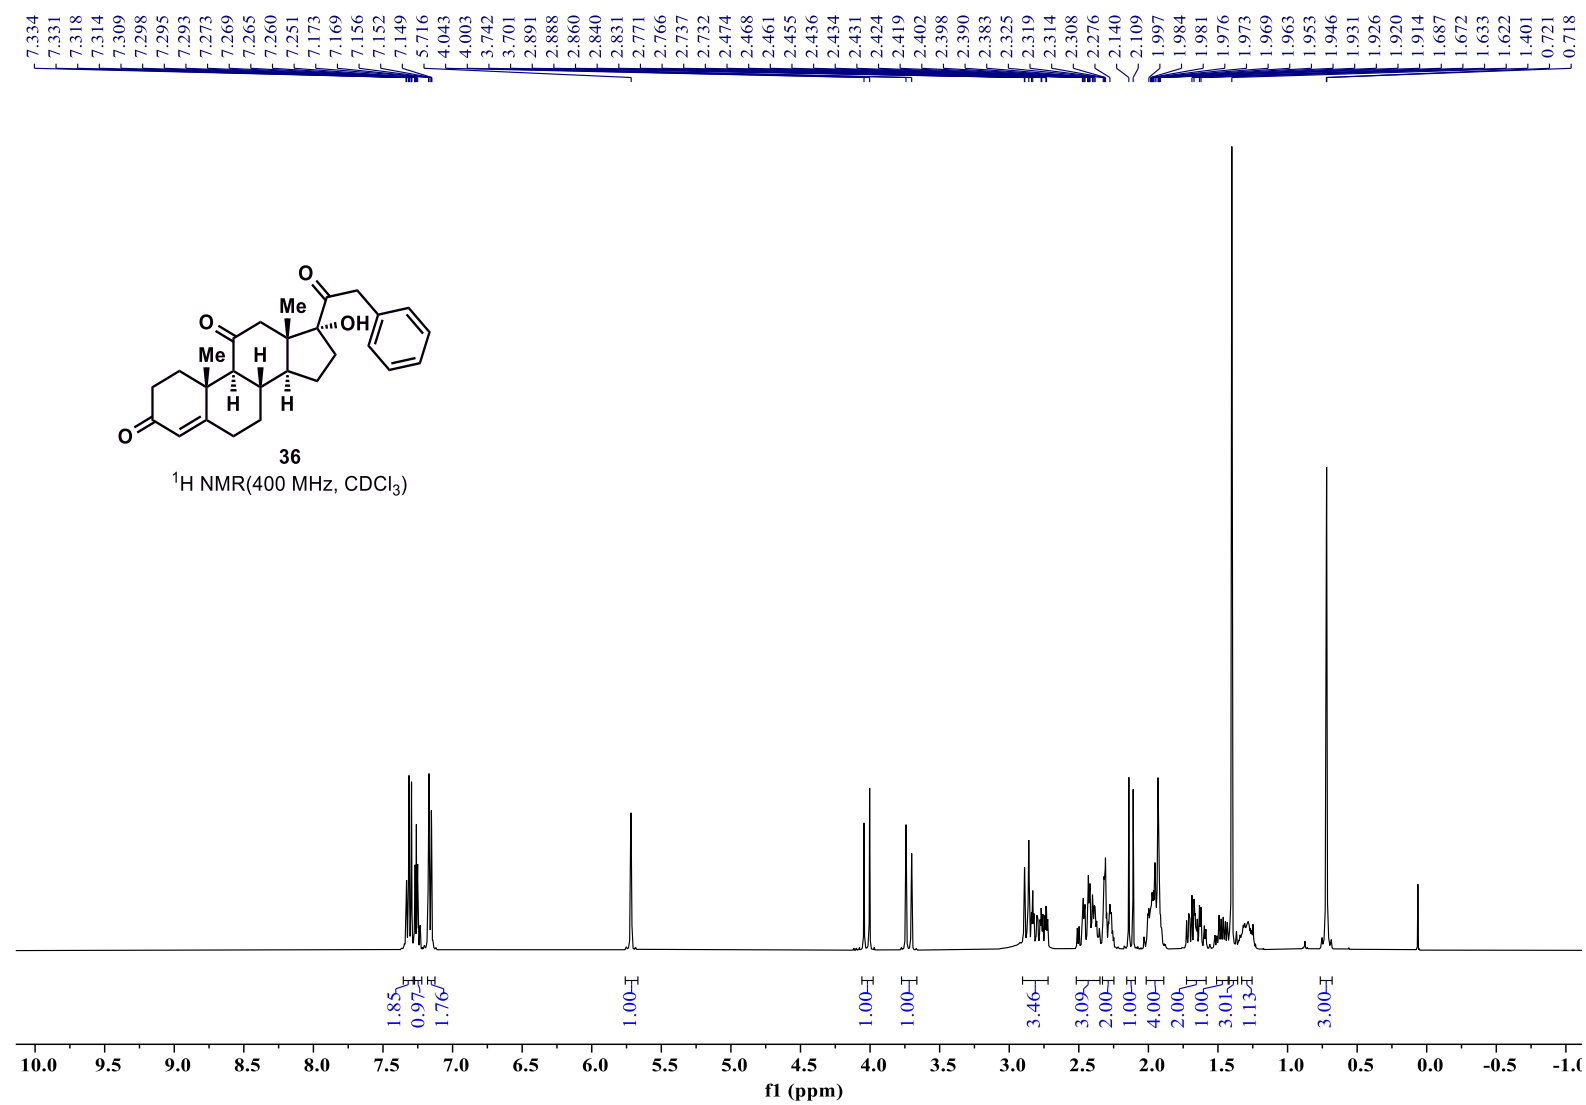

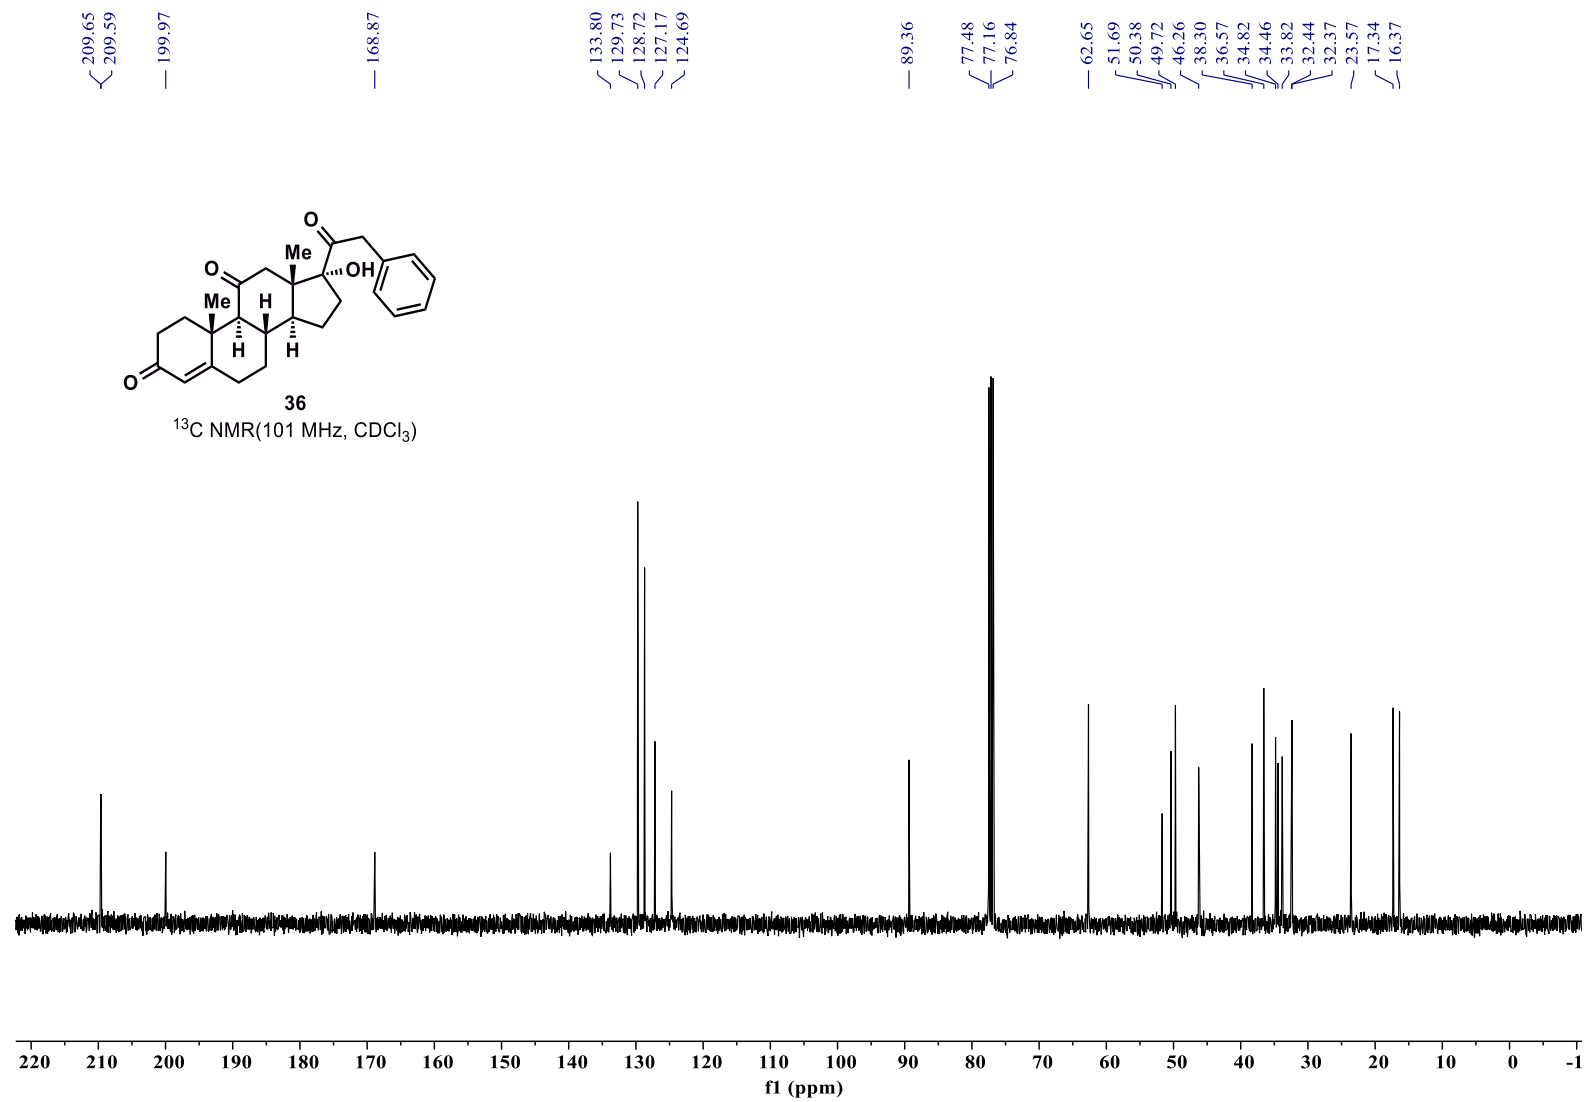

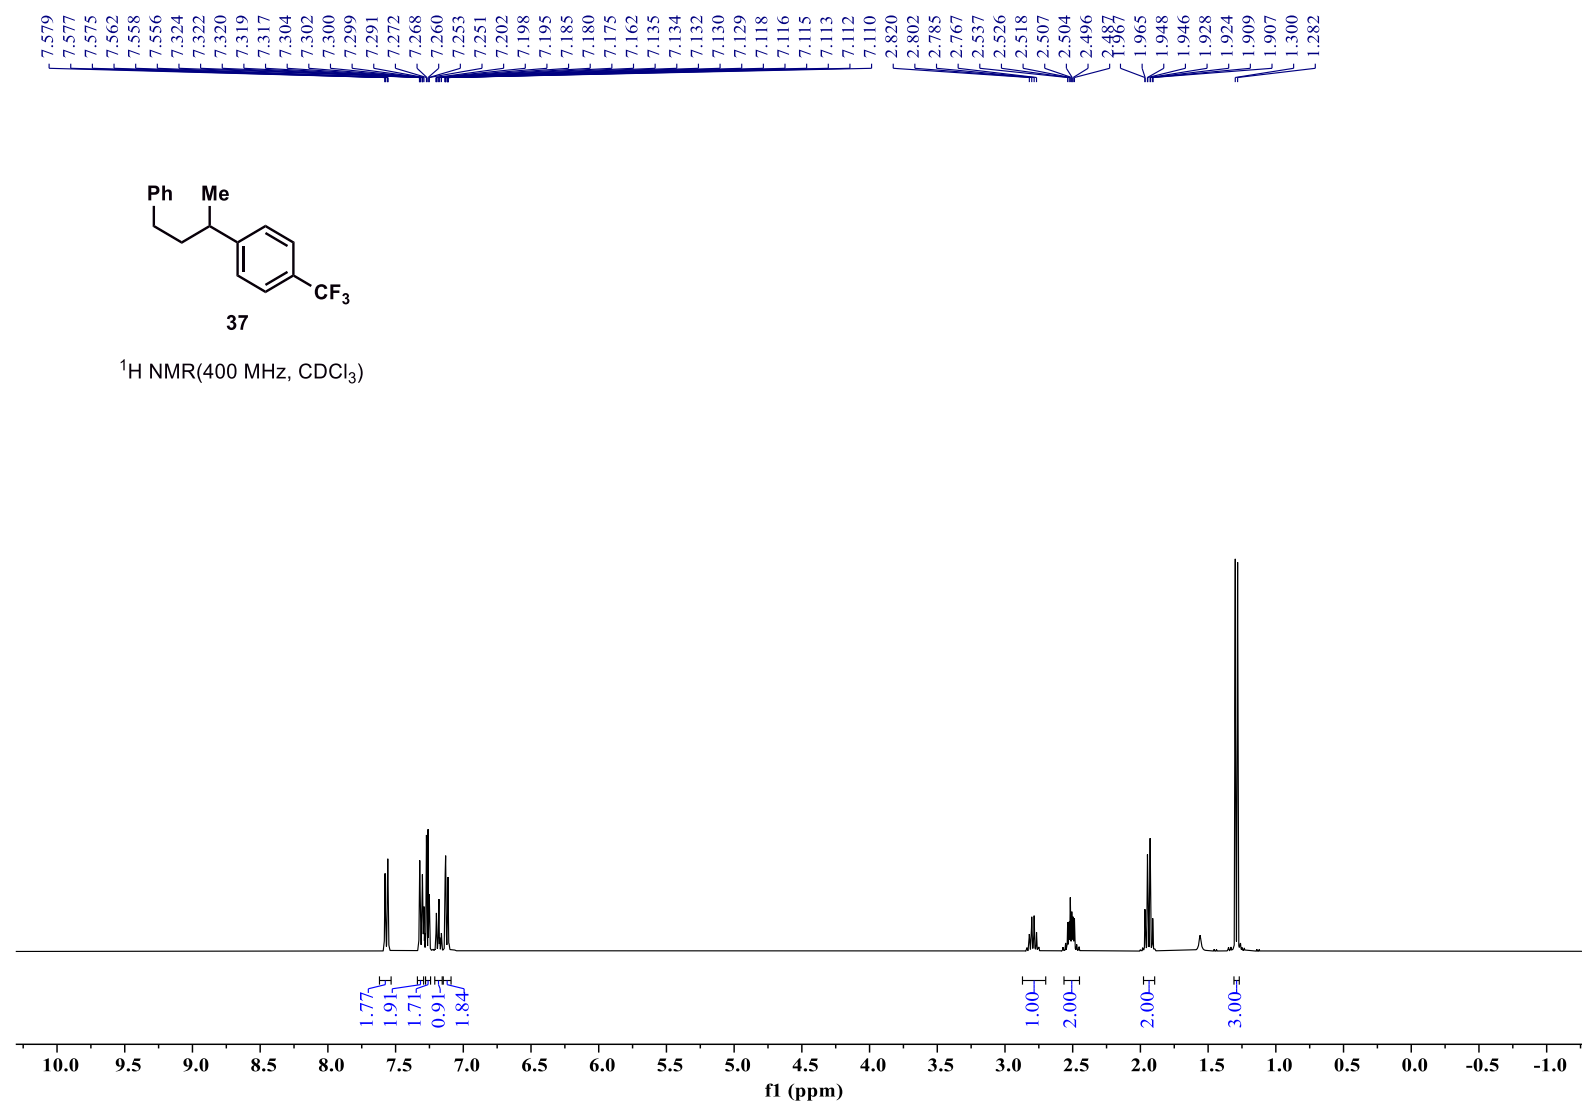

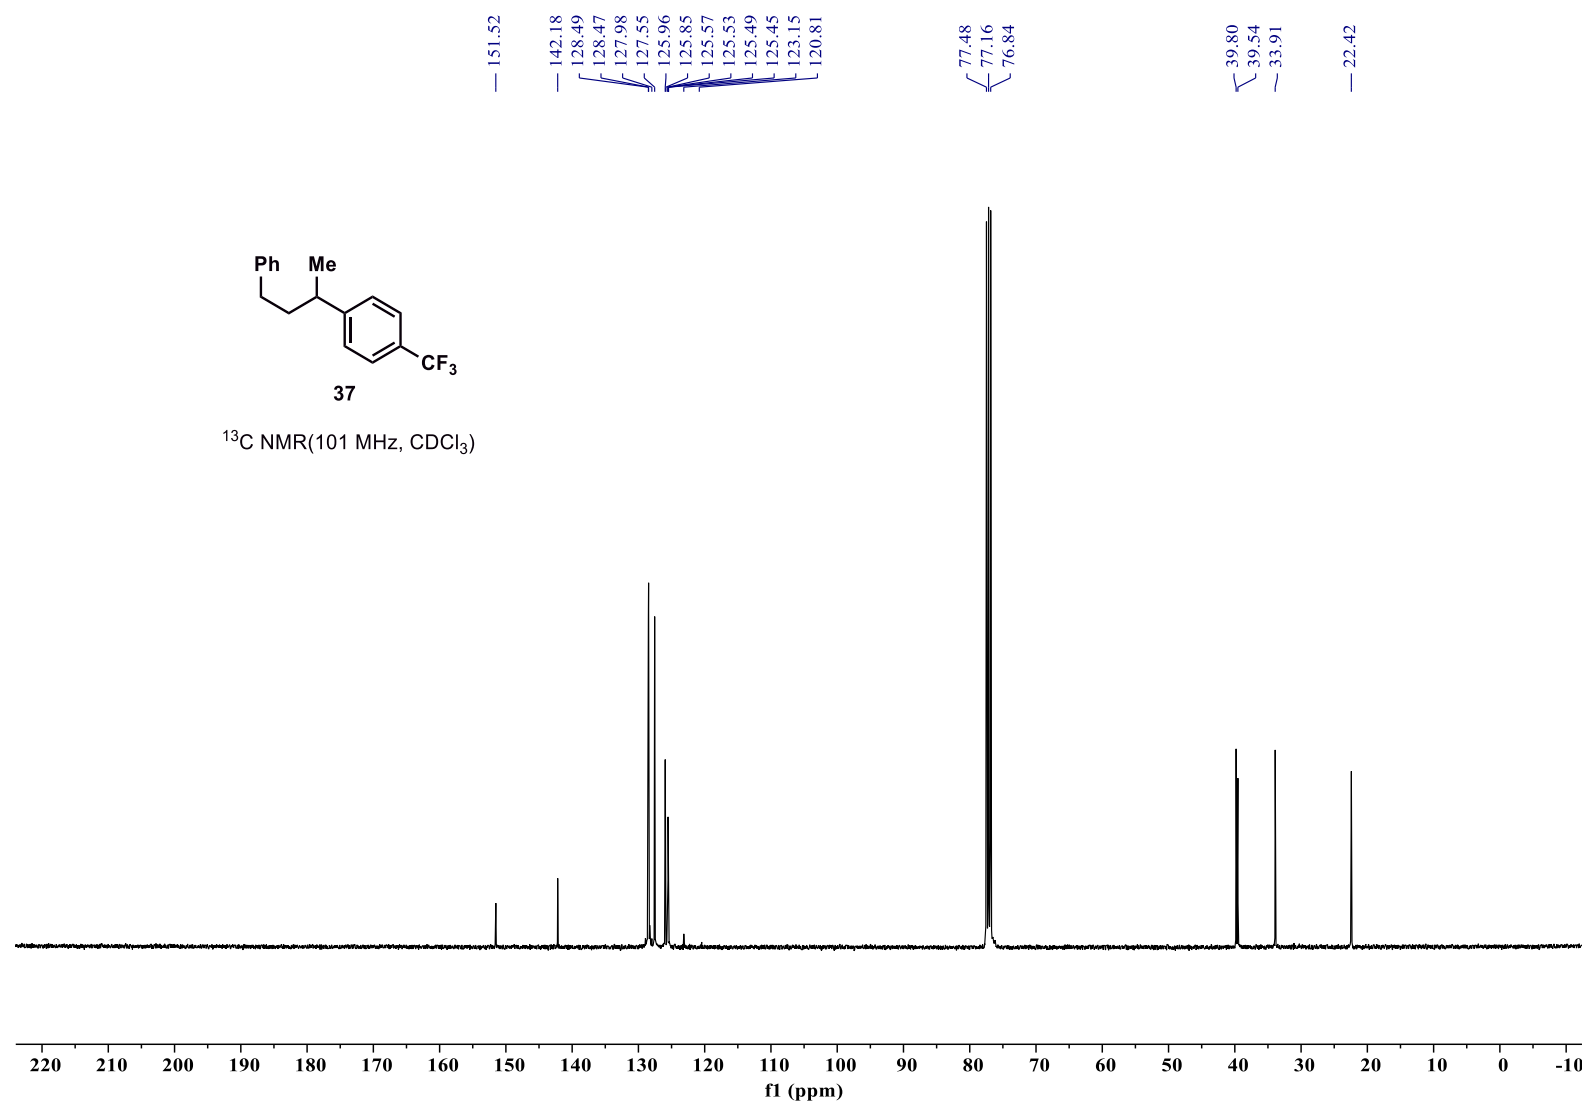

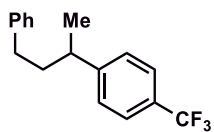

37

$^{19}\text{F}$  NMR(400 MHz,  $\text{CDCl}_3$ )

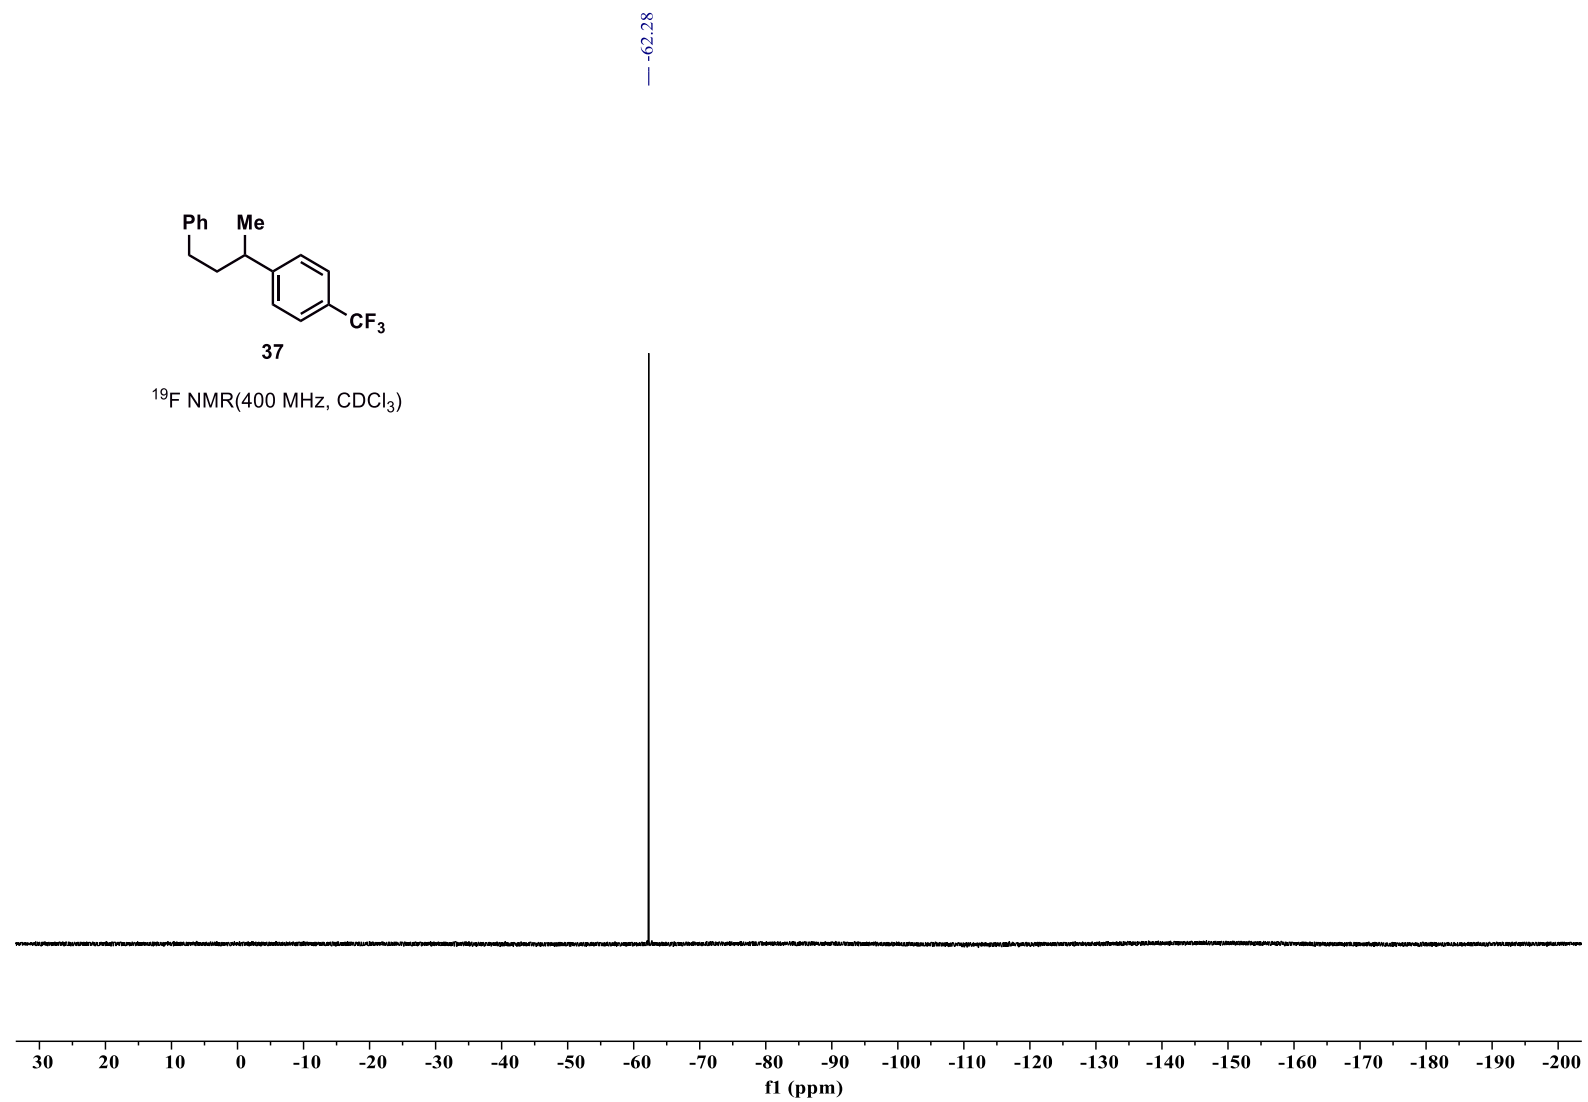

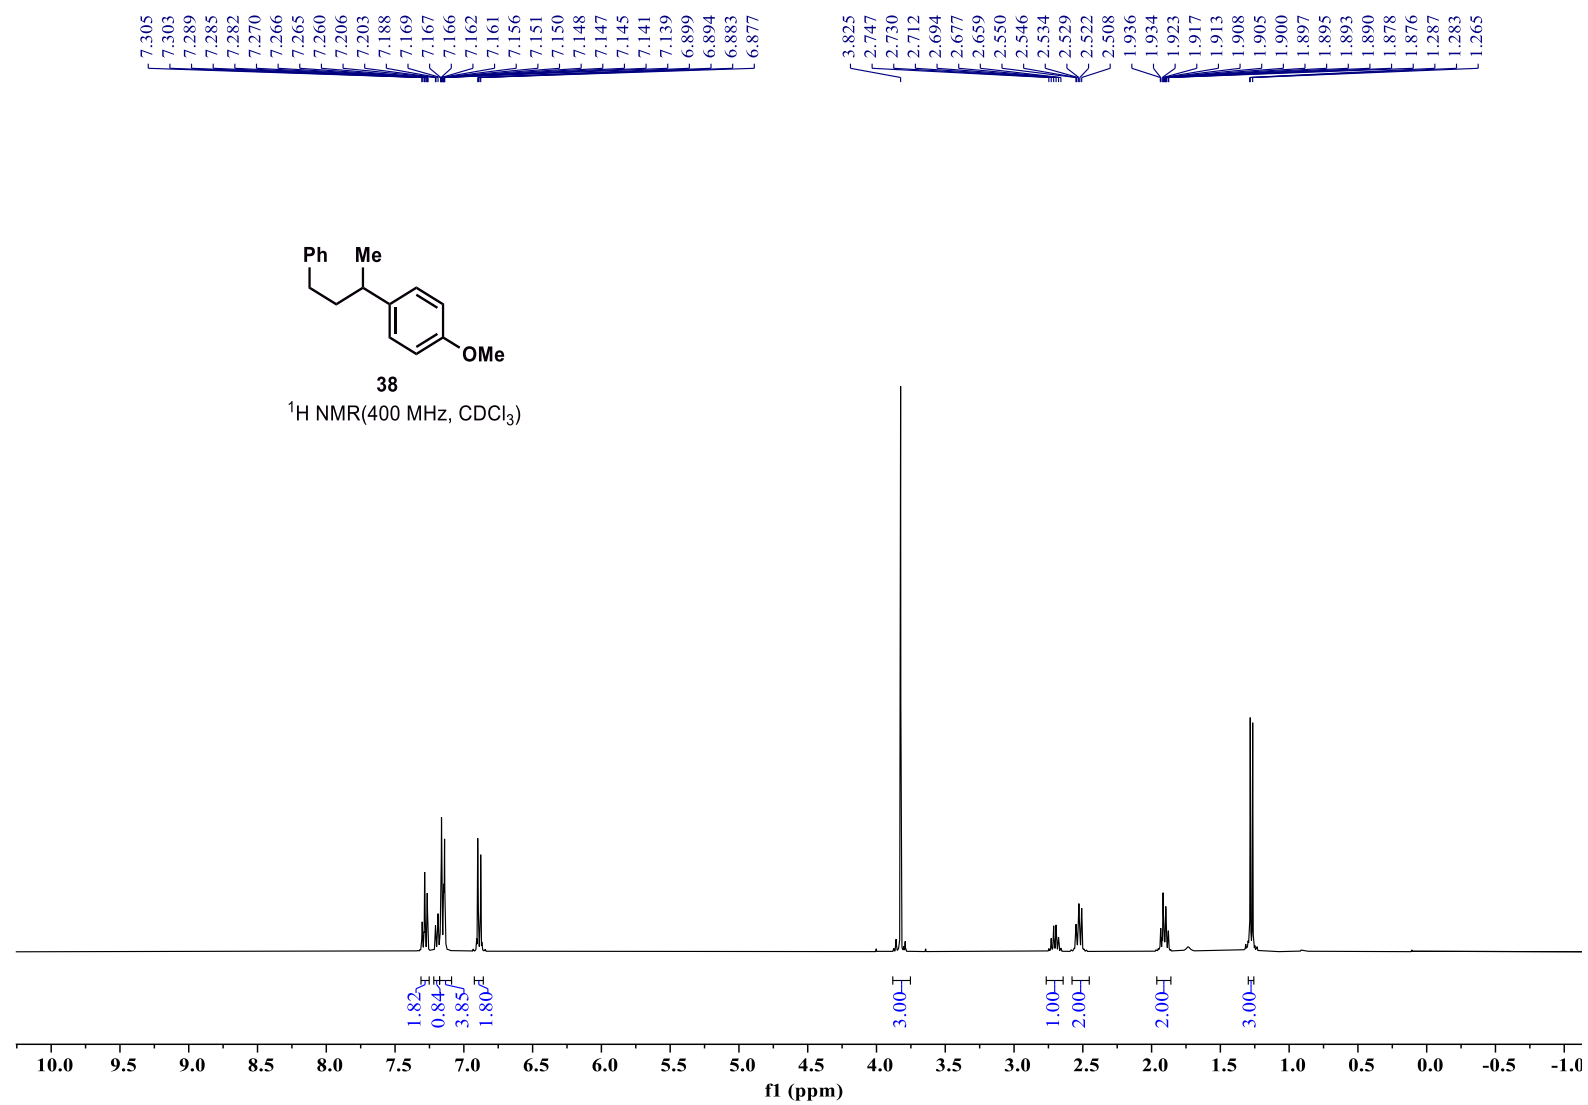

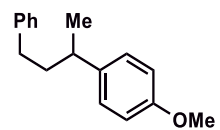

38

$^{13}\text{C}$  NMR (101 MHz,  $\text{CDCl}_3$ )

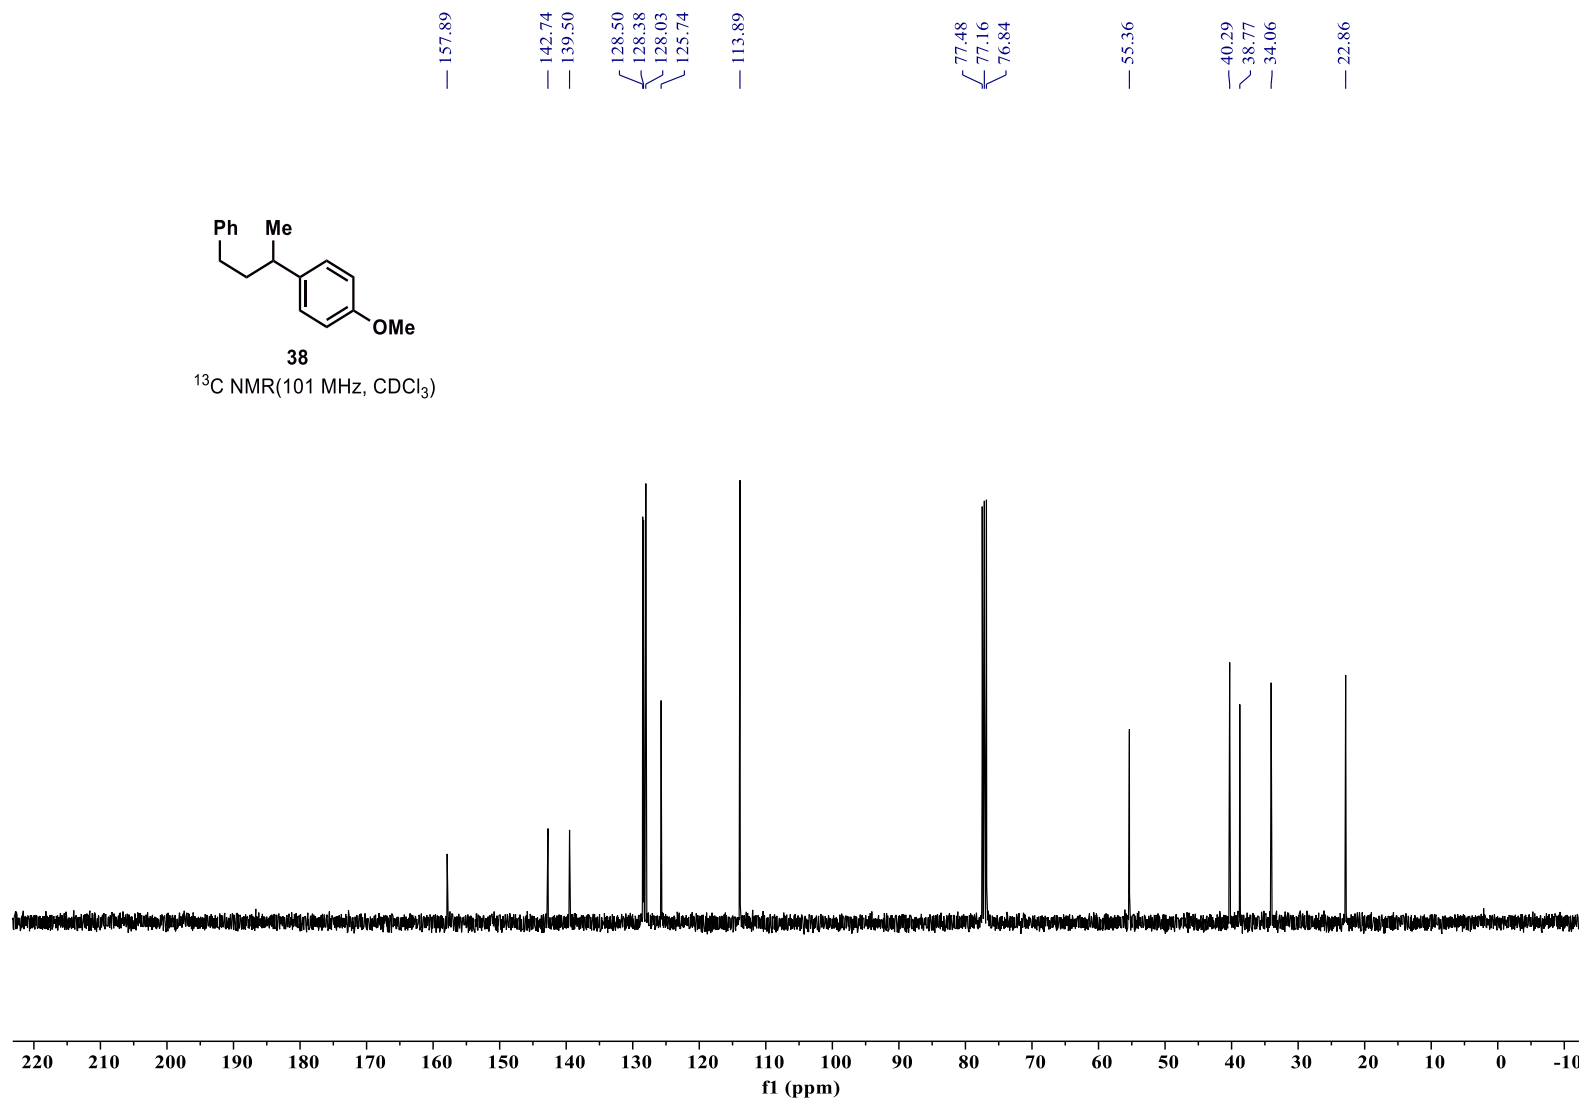

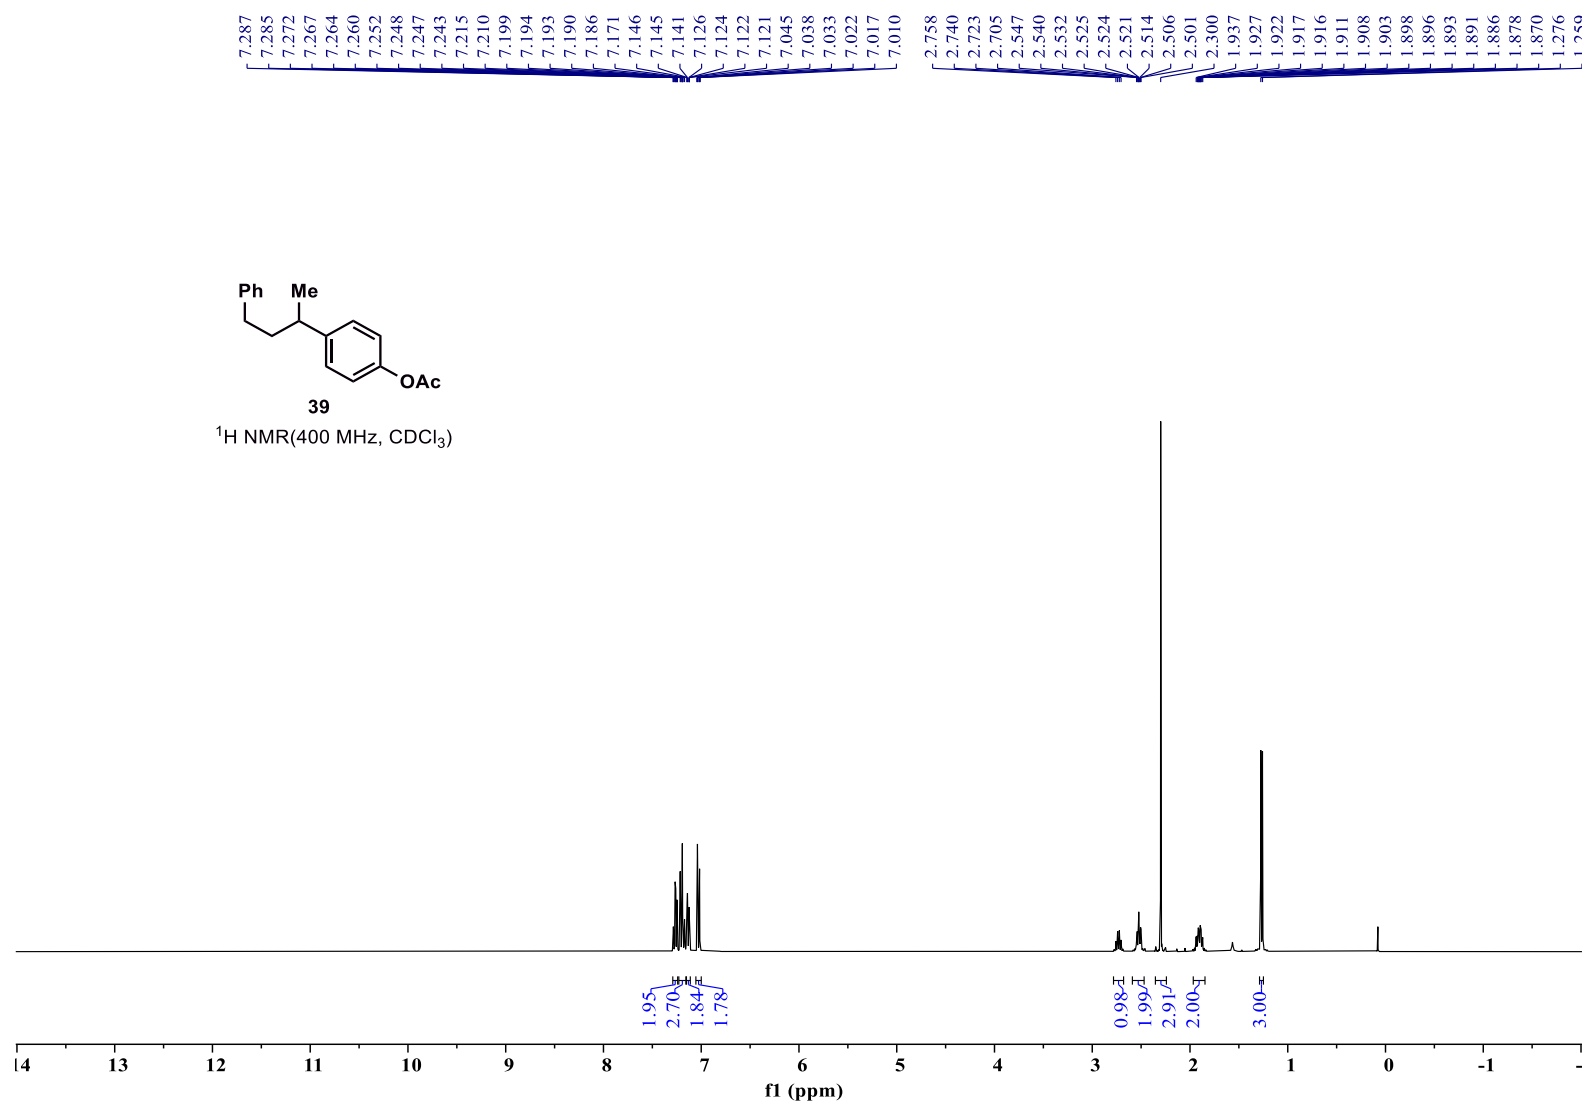

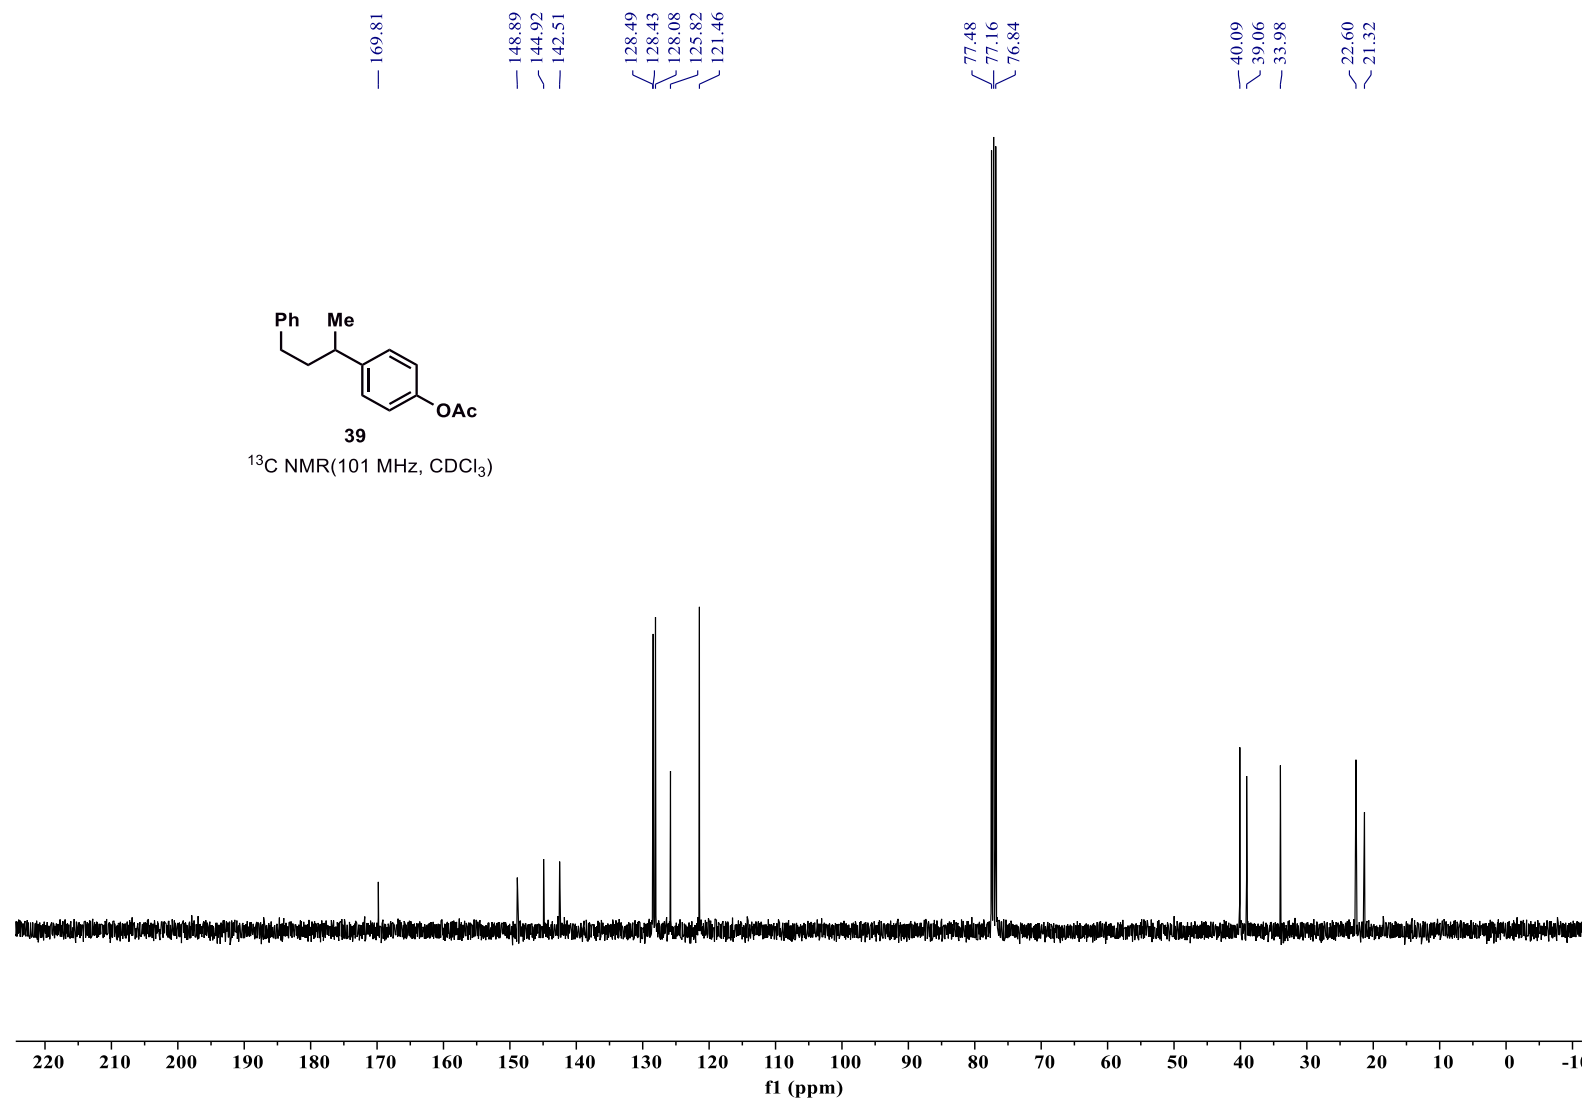

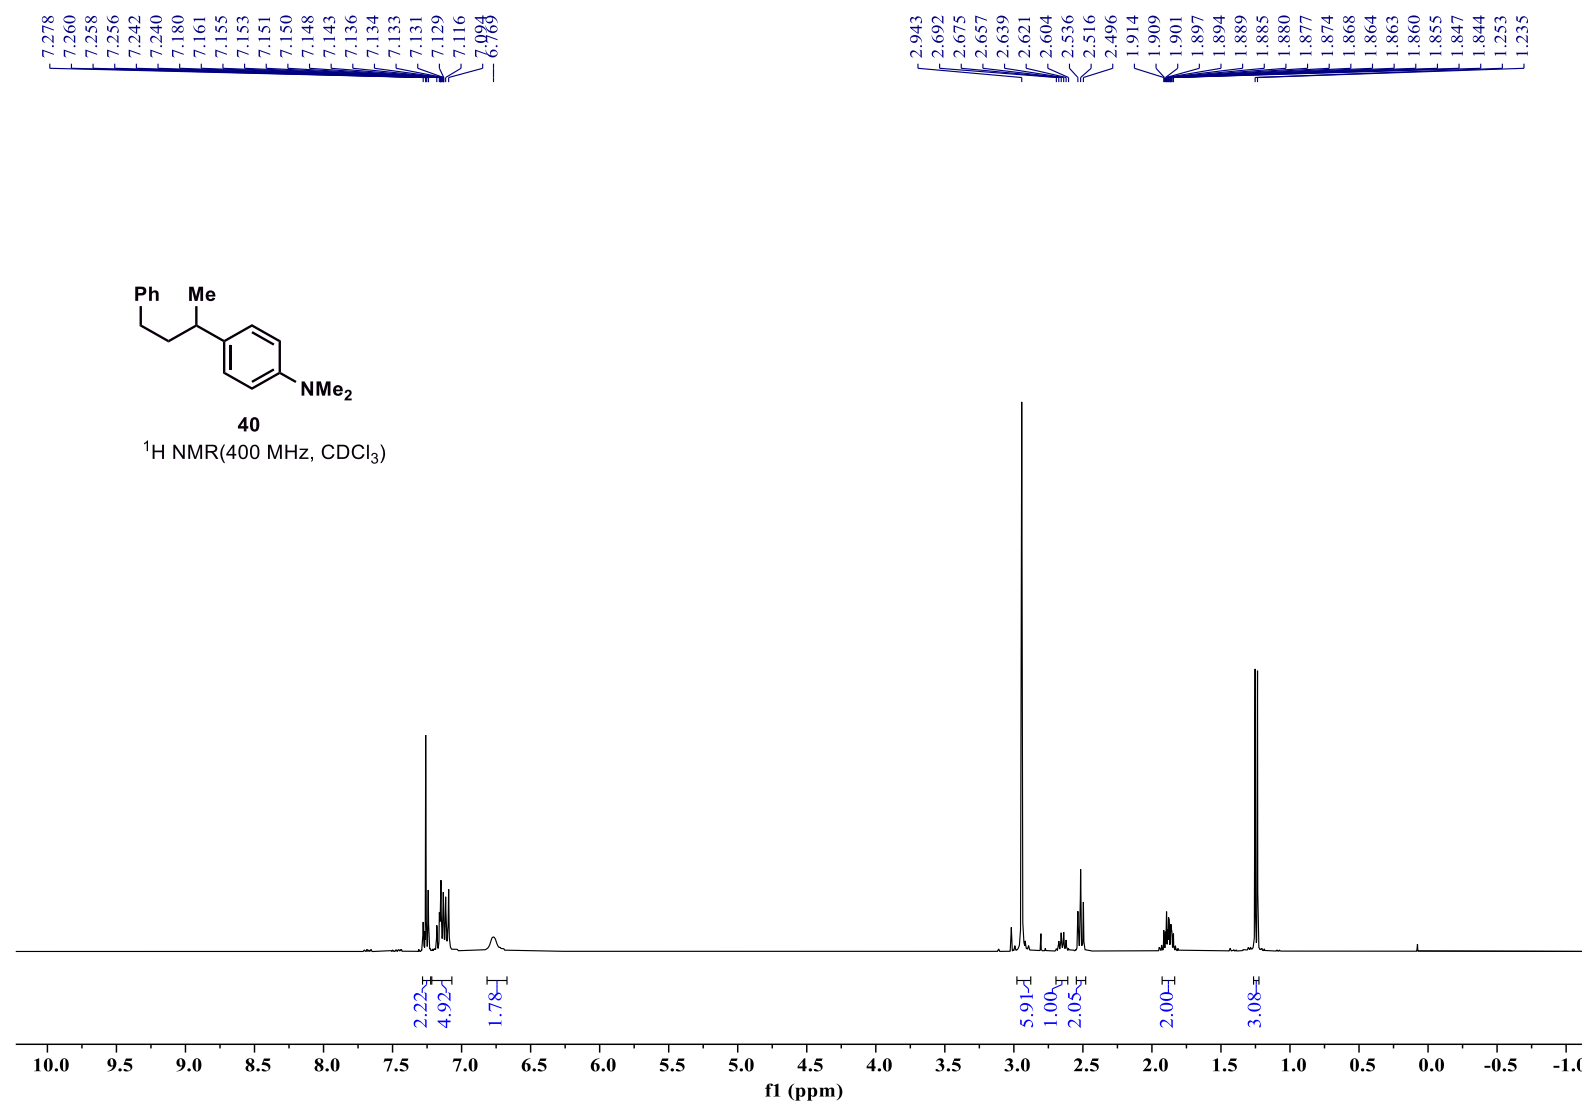

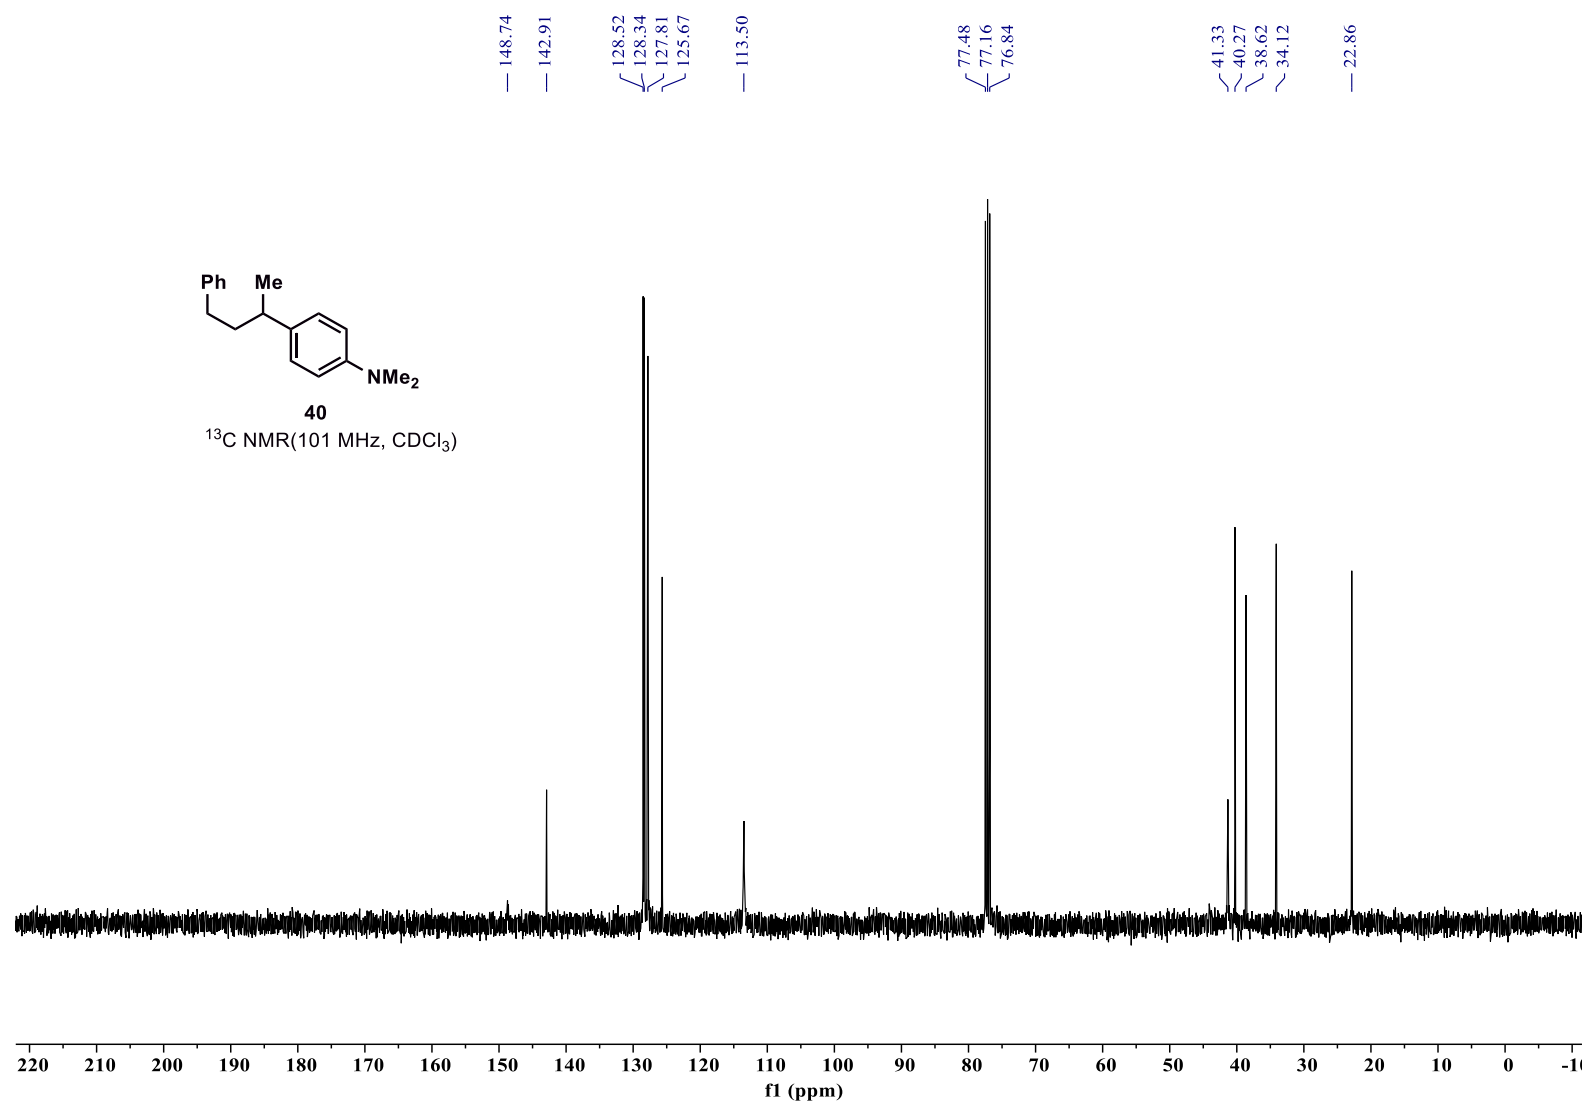

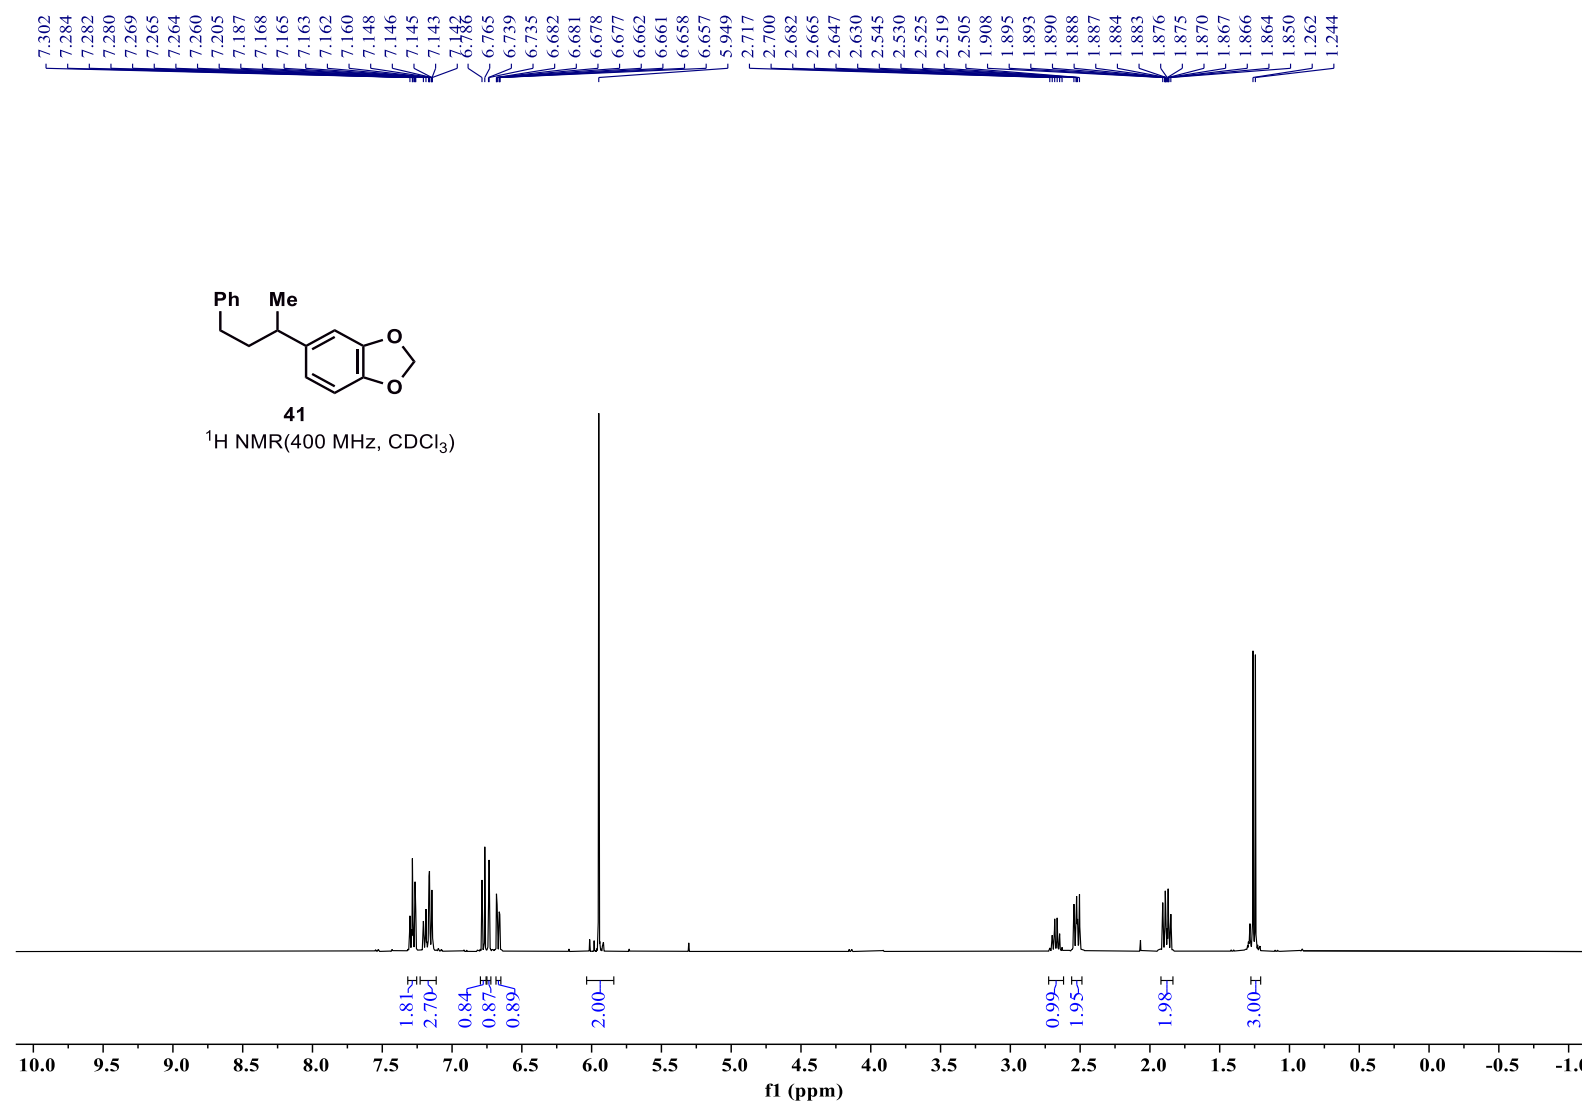

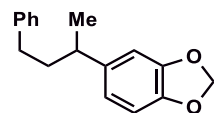

**41**

$^{13}\text{C}$  NMR(101 MHz,  $\text{CDCl}_3$ )

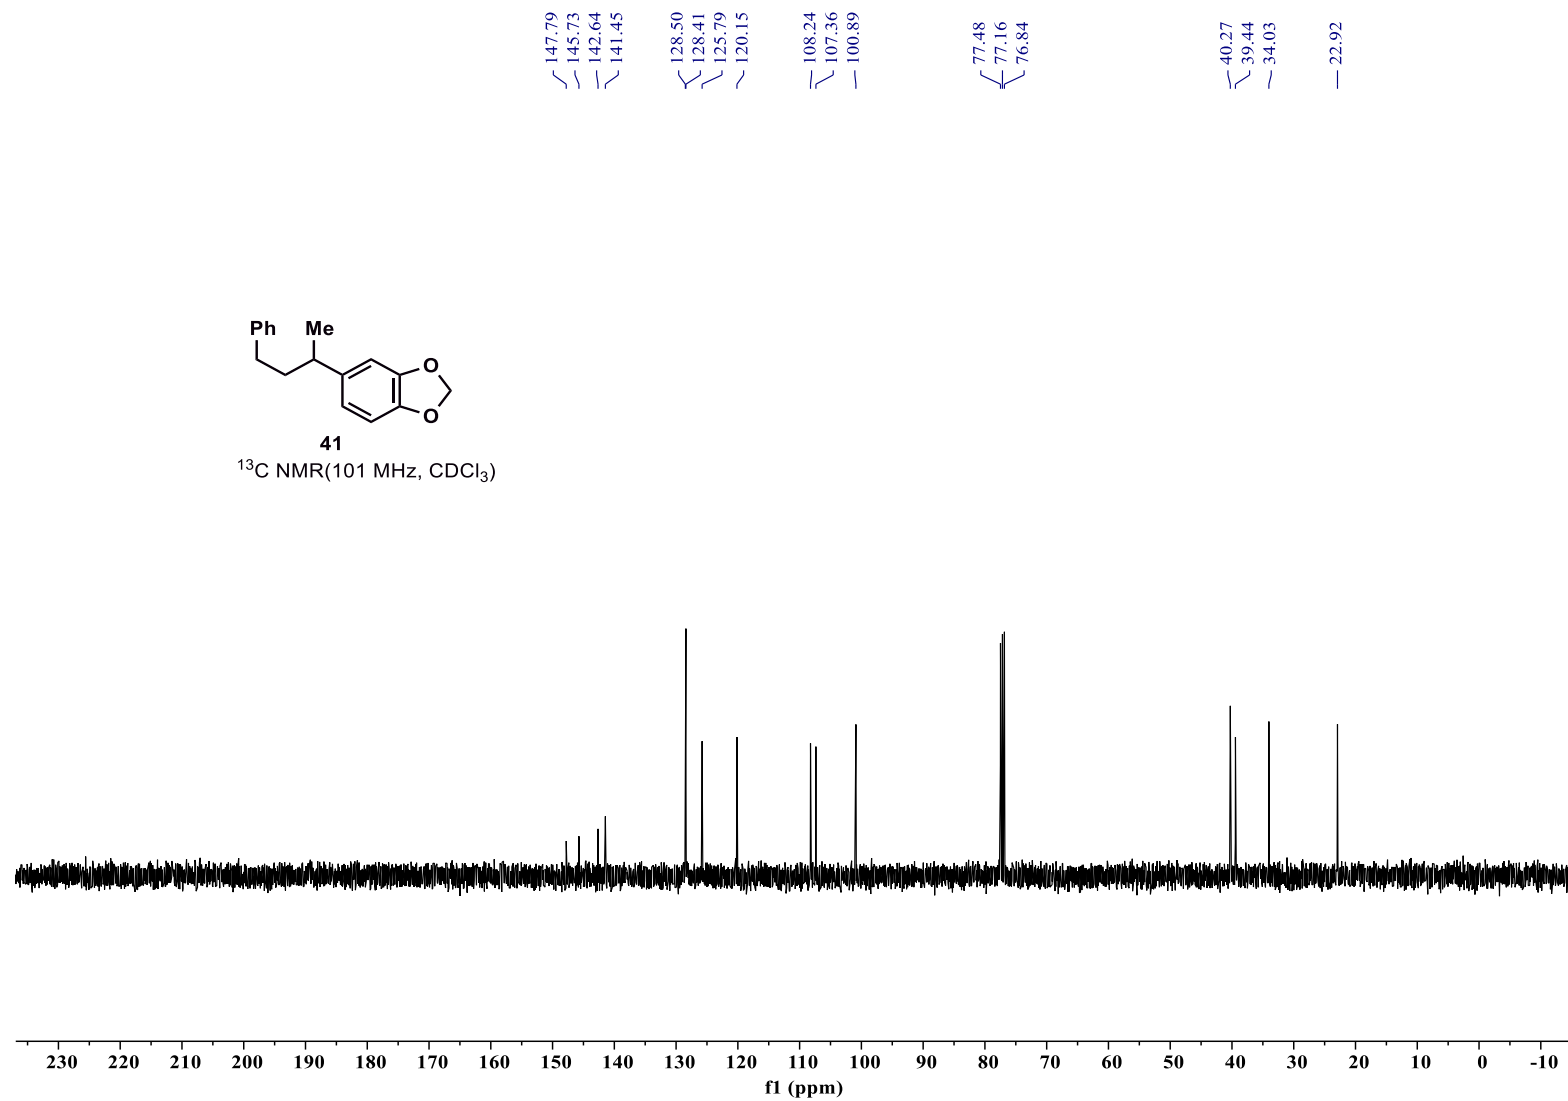

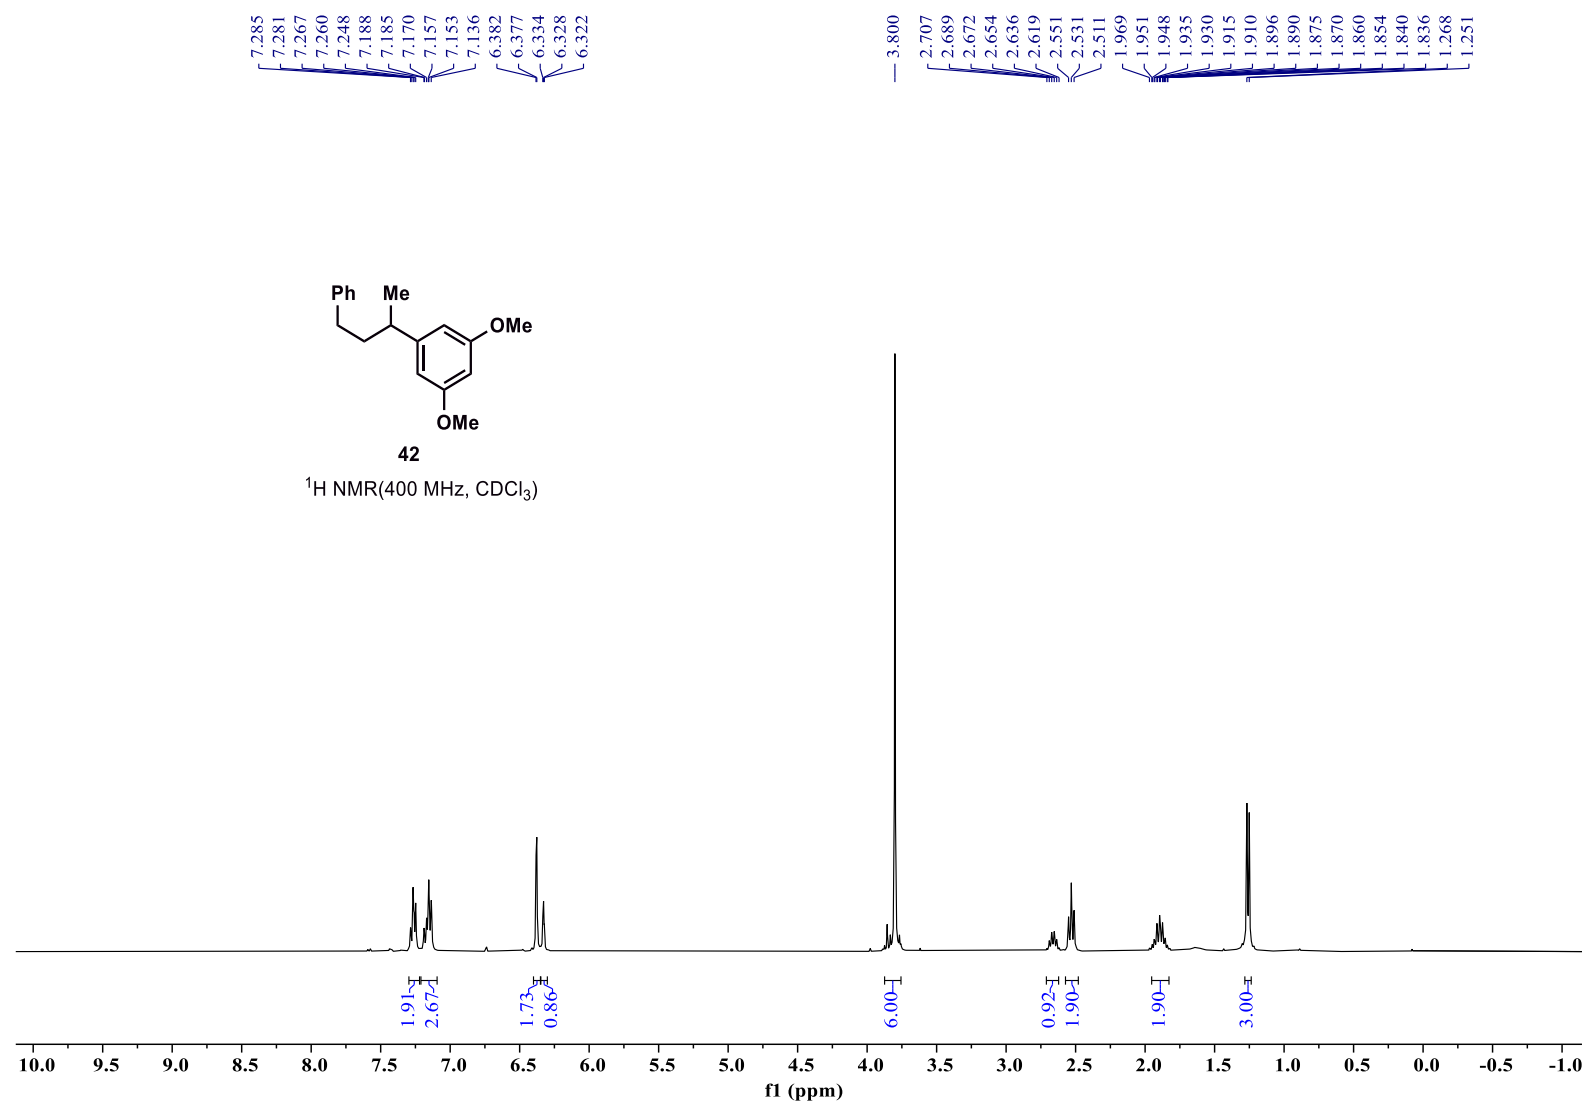

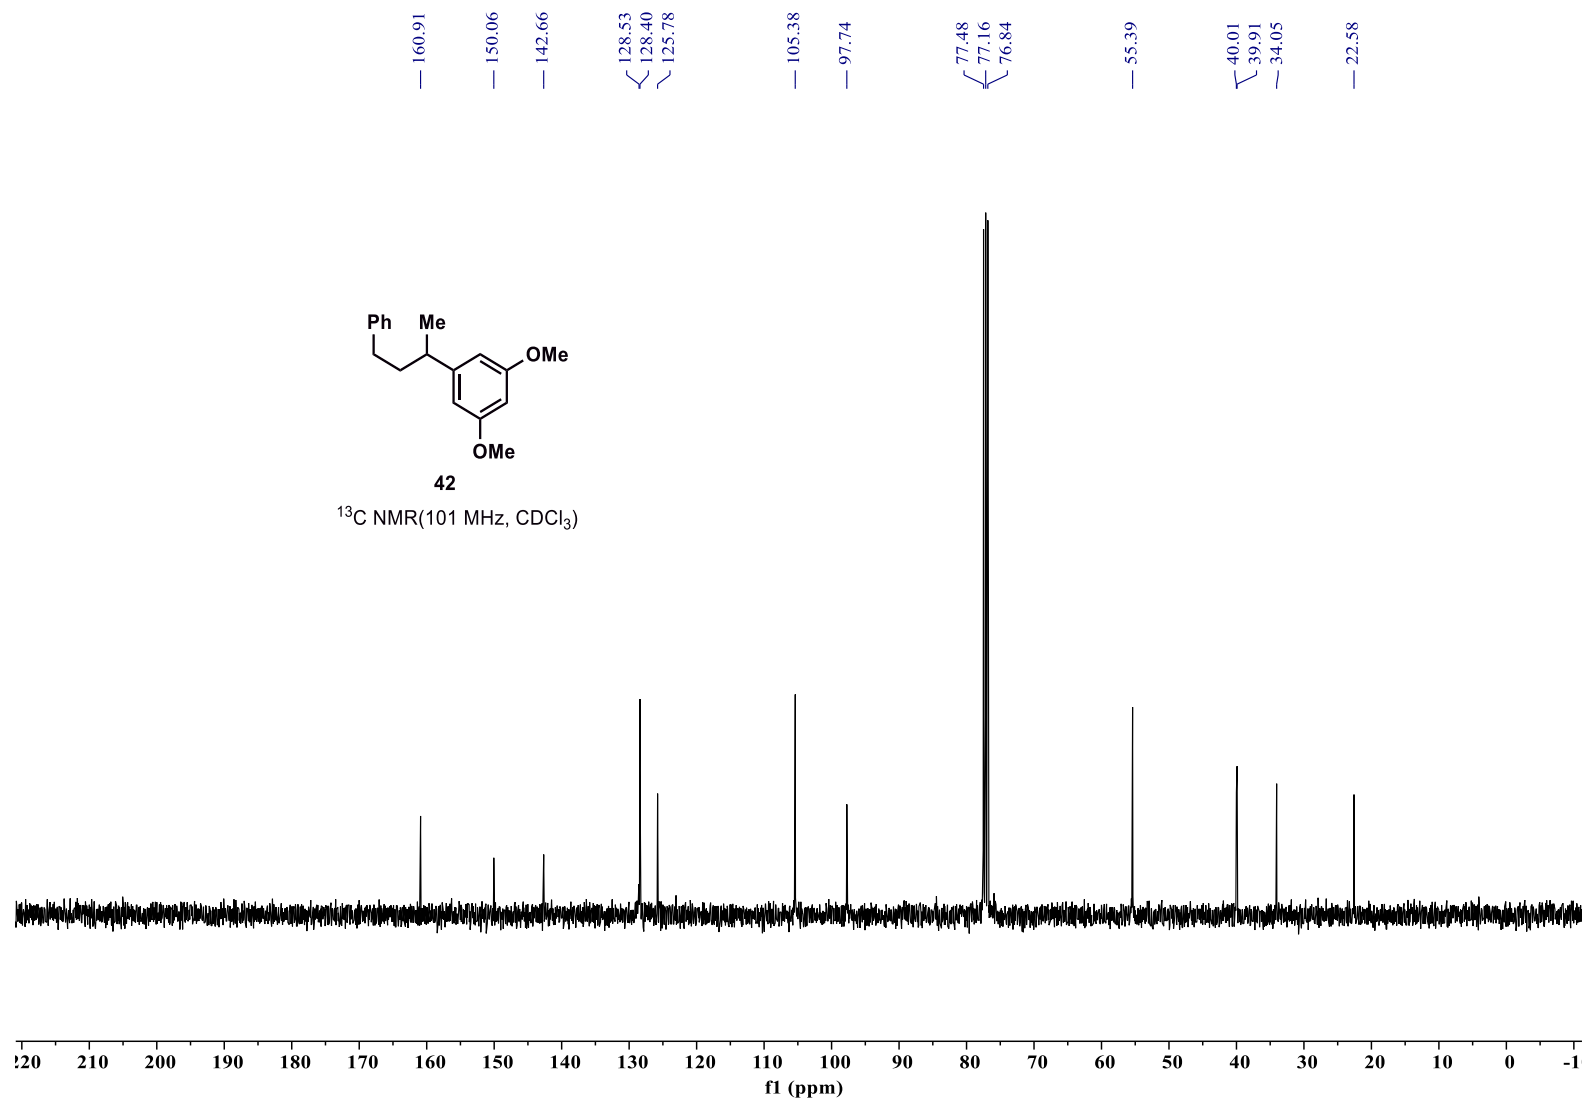

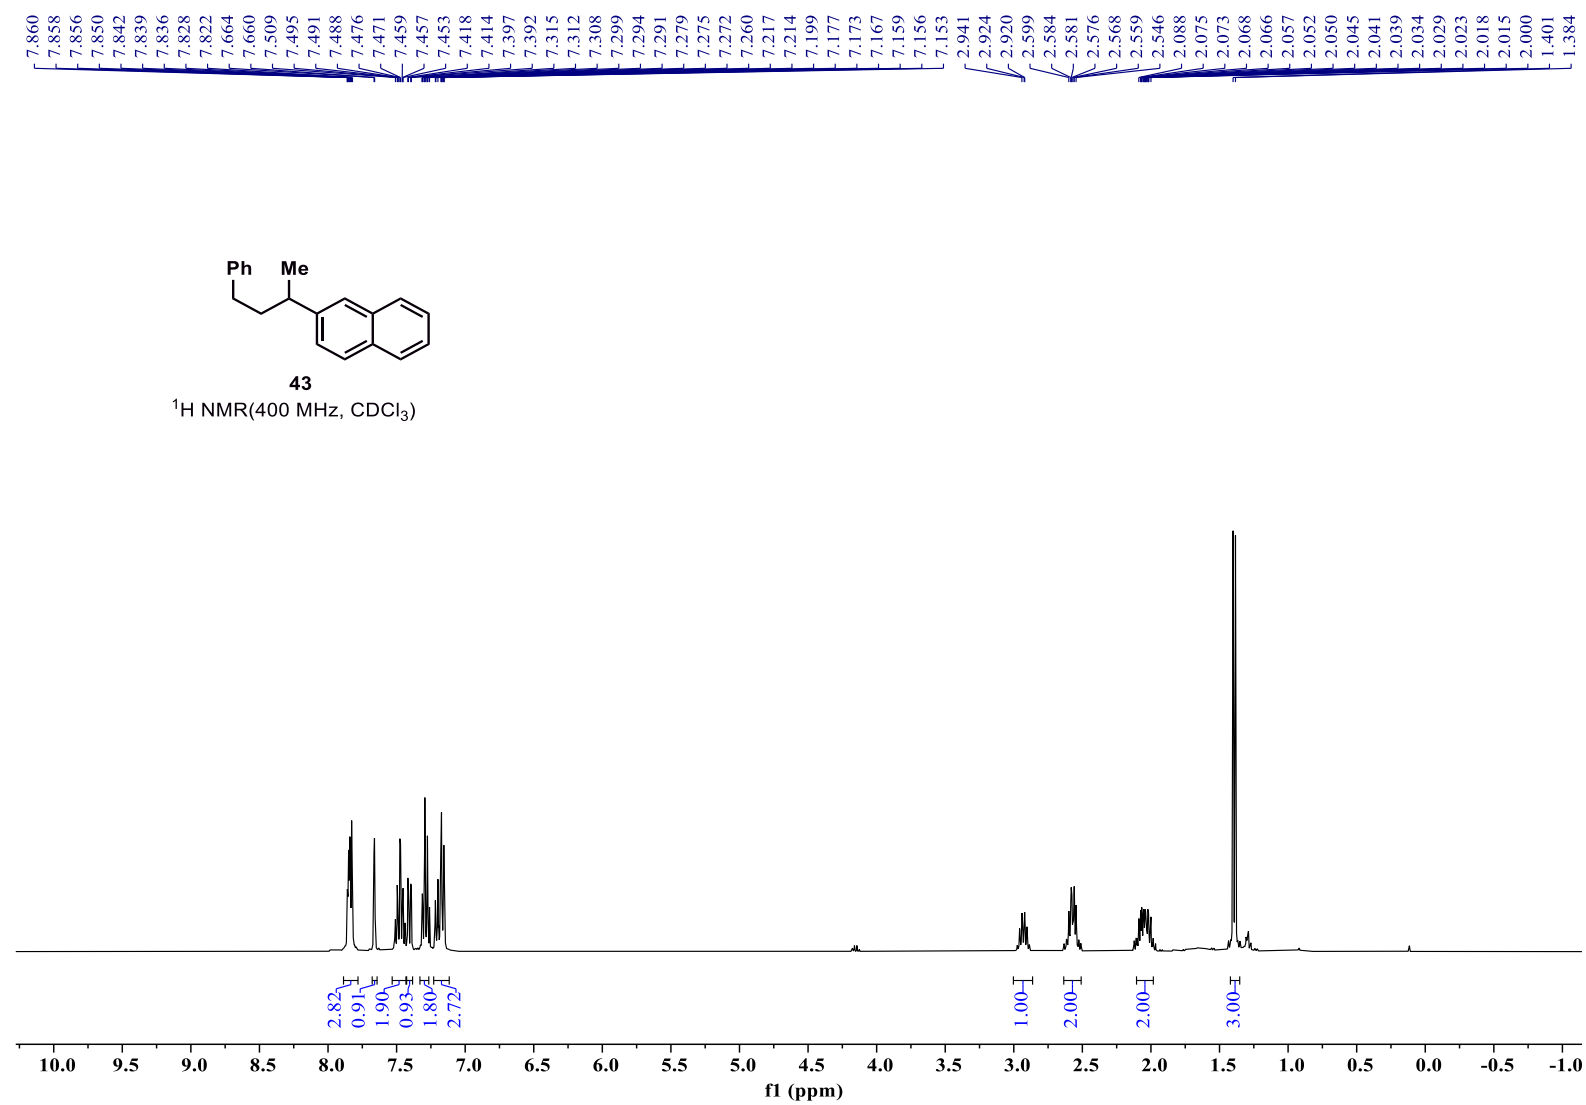

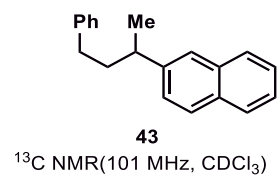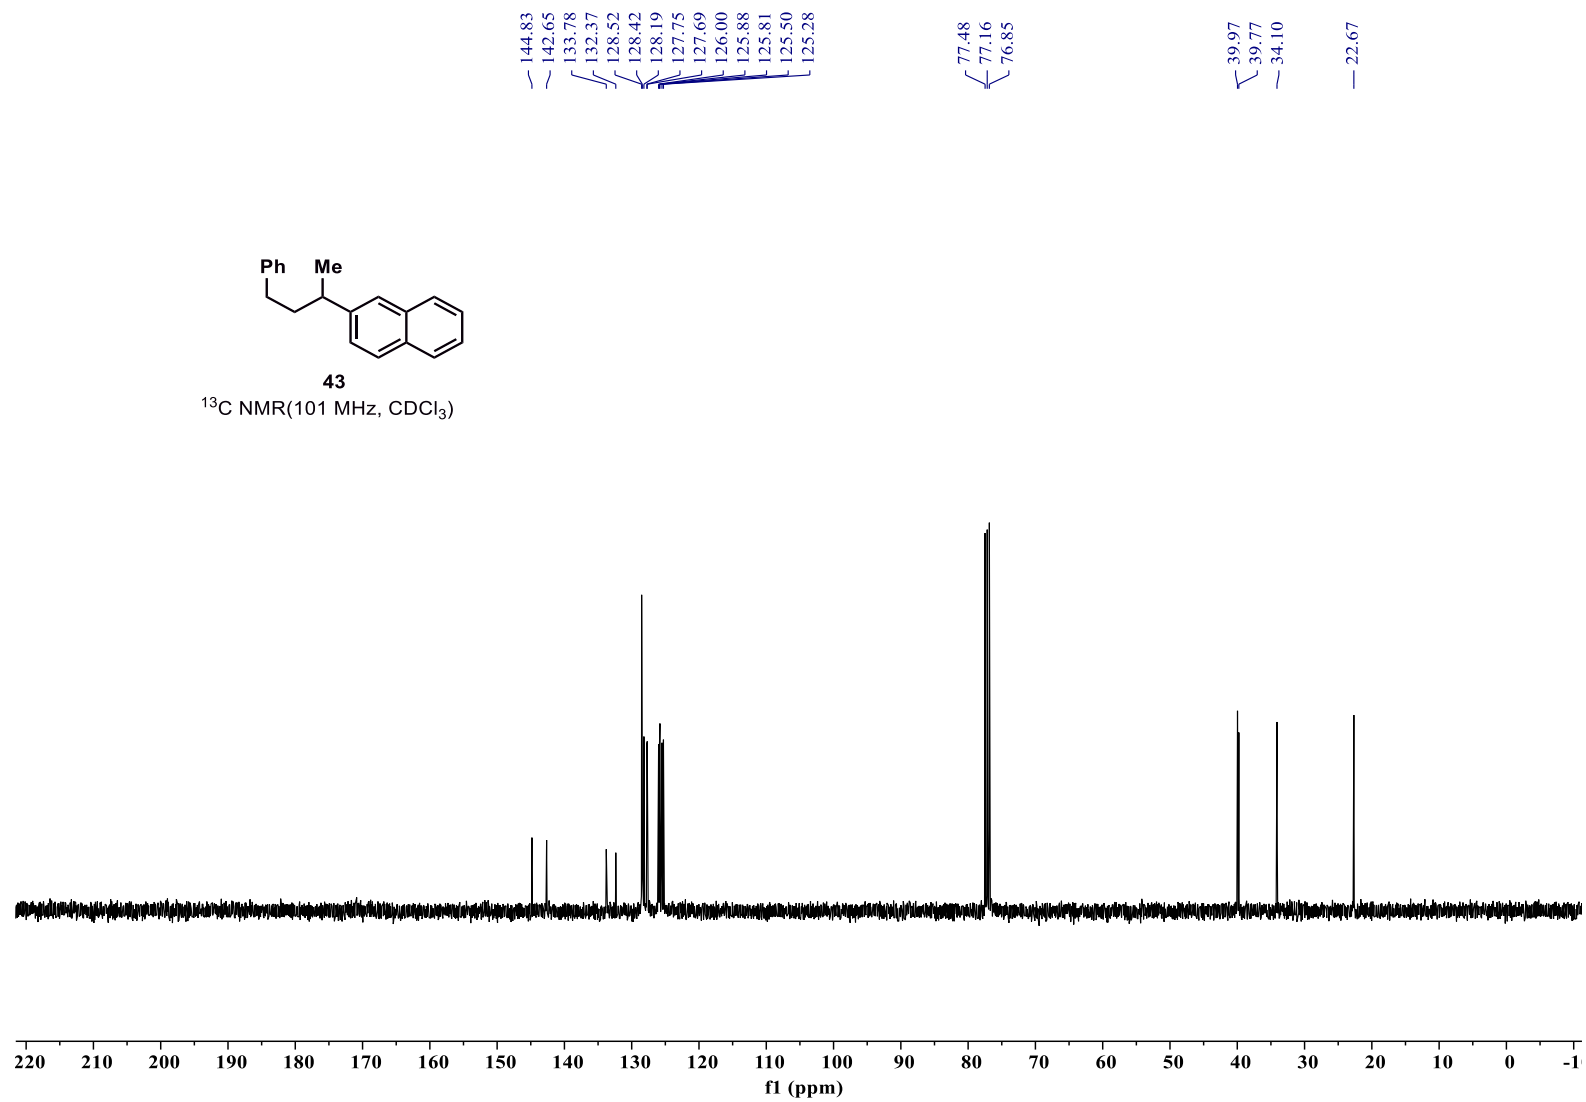

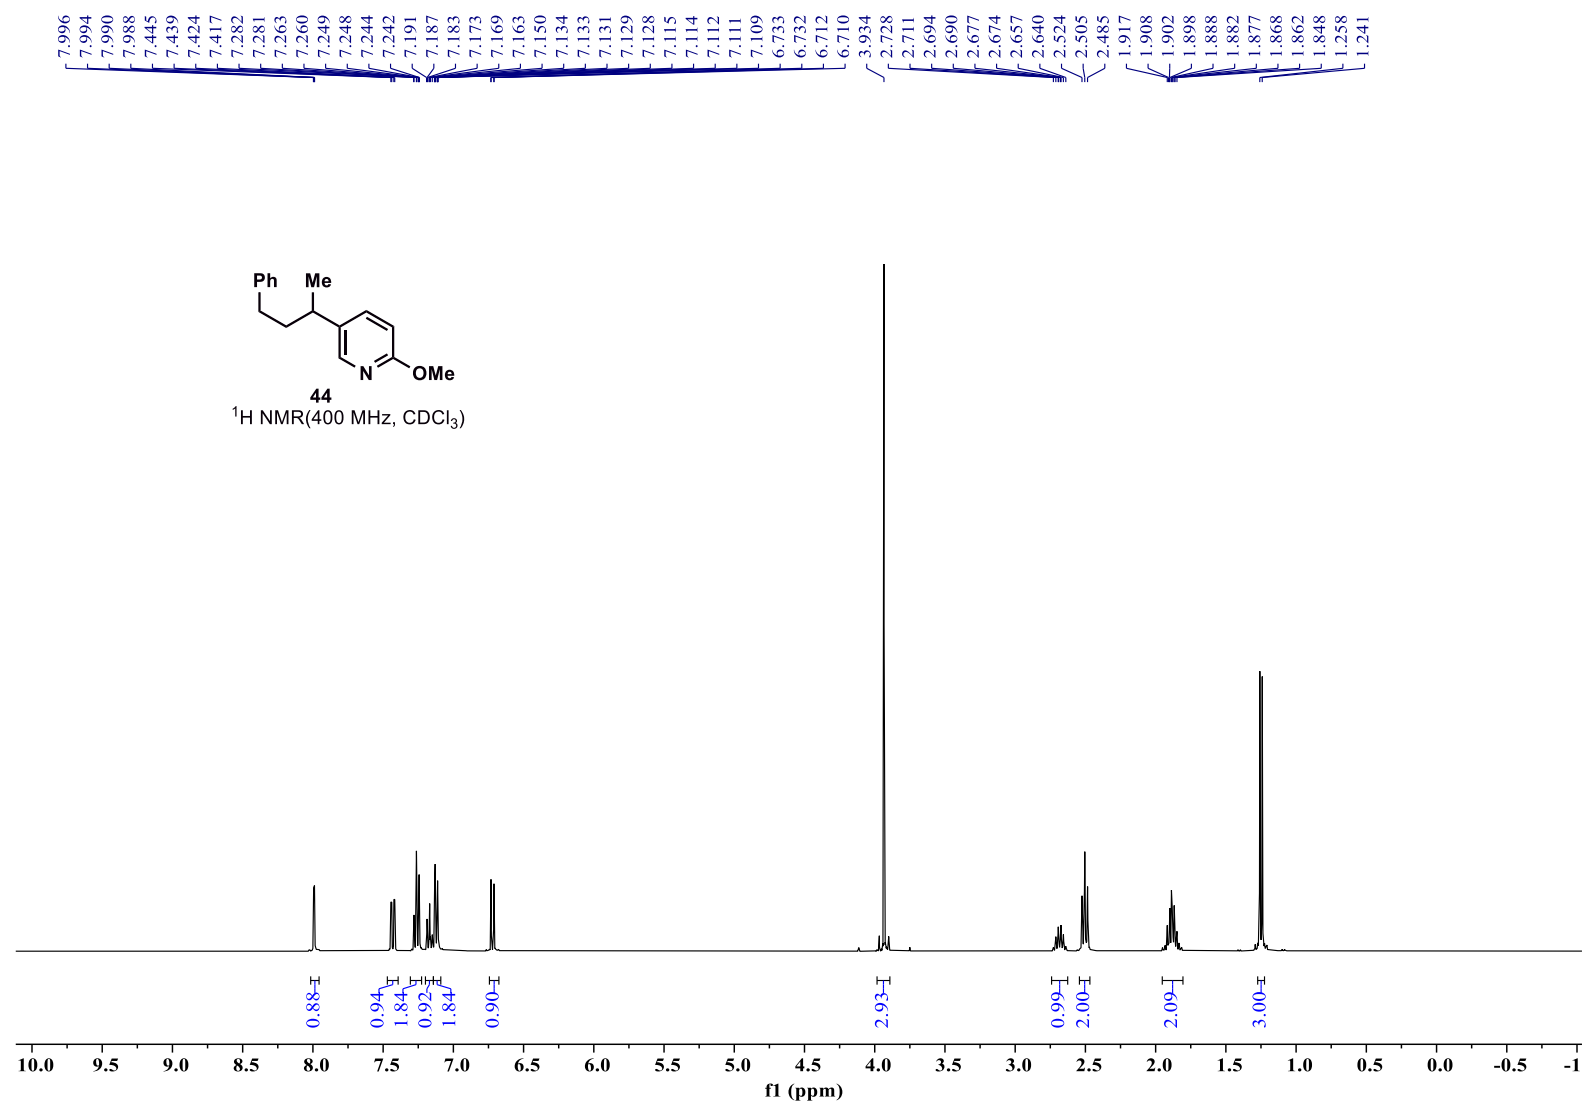

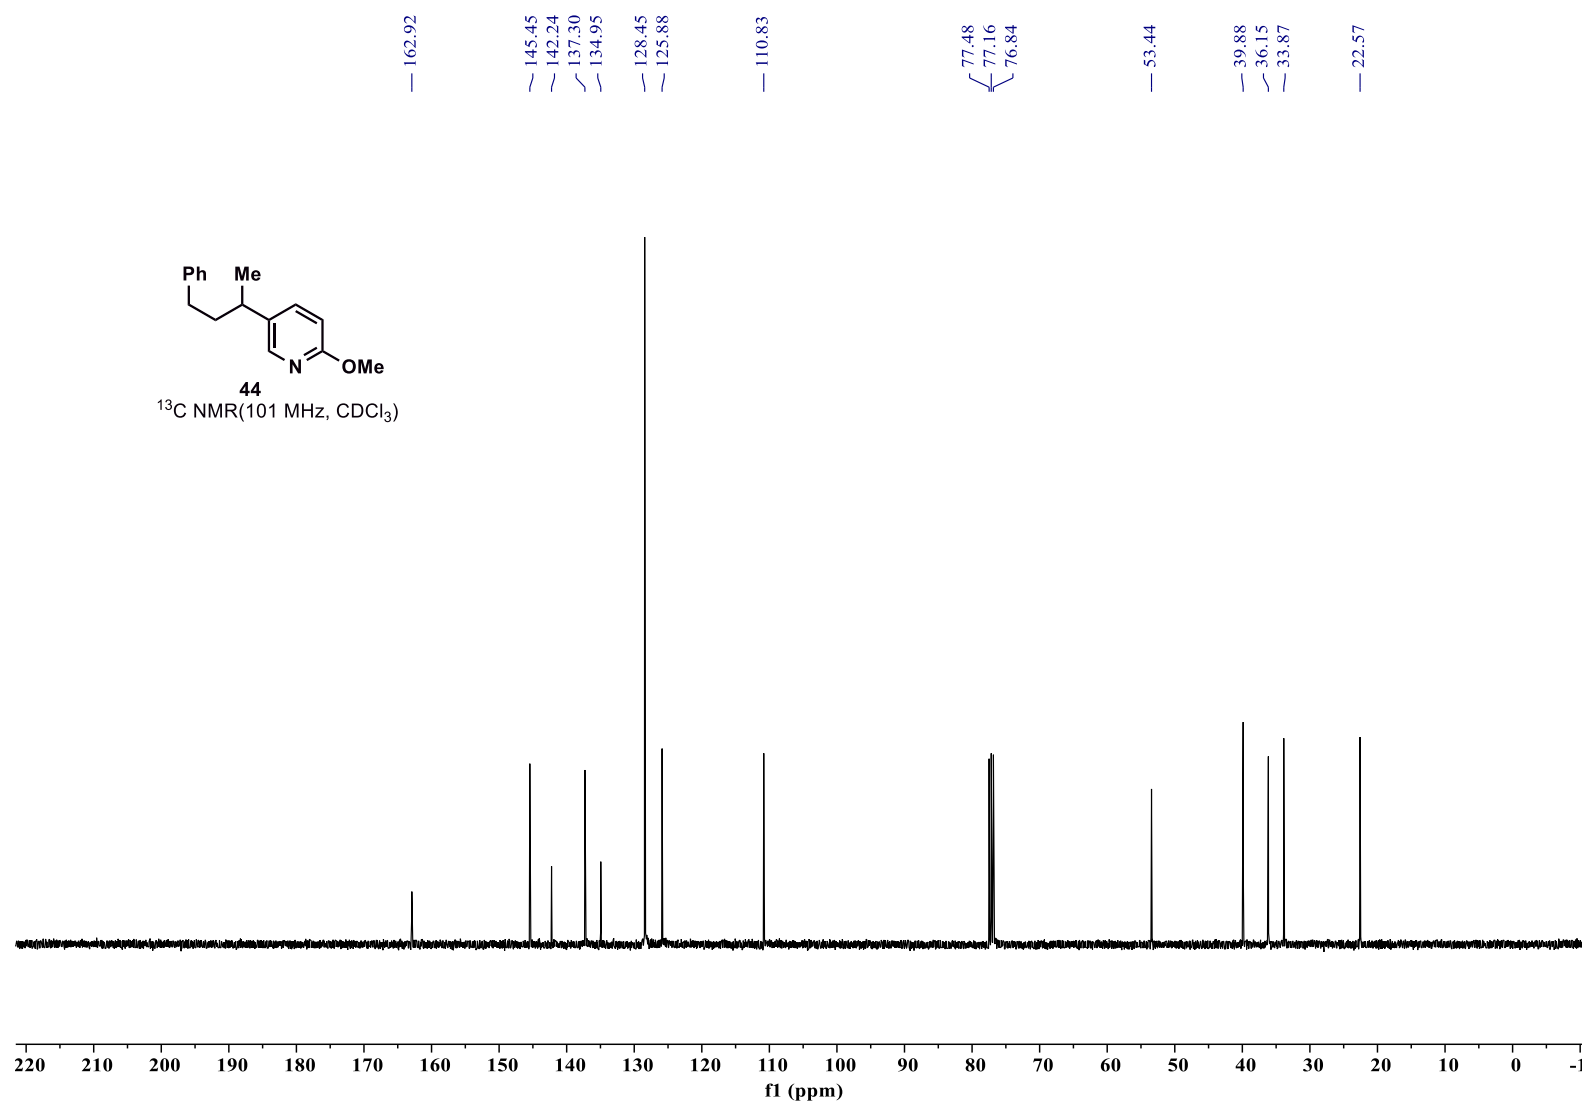

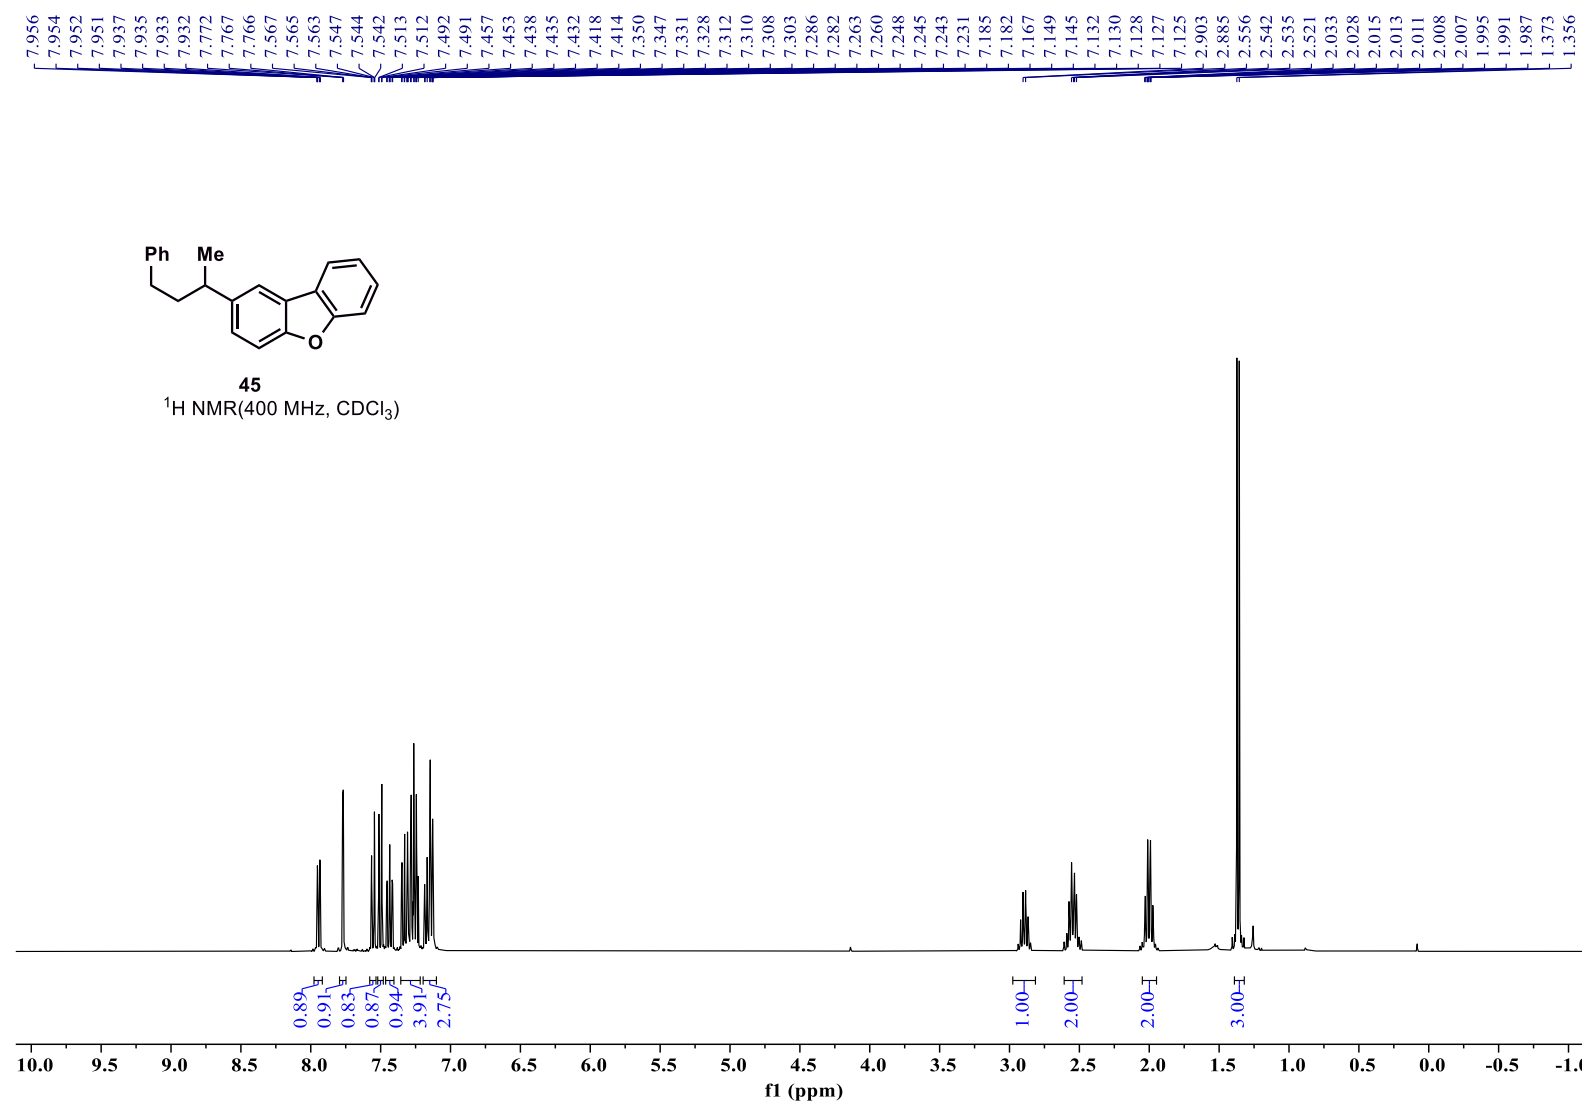

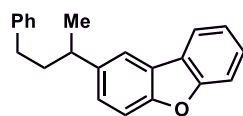

**45**

$^{13}\text{C}$  NMR (101 MHz,  $\text{CDCl}_3$ )

156.64  
154.95

142.60  
142.02  
128.51  
128.43  
127.08  
126.47  
125.82  
124.48  
124.35  
122.67  
120.68  
118.82  
111.78  
111.51

77.47  
77.16  
76.84

40.56  
39.65  
34.12

23.21

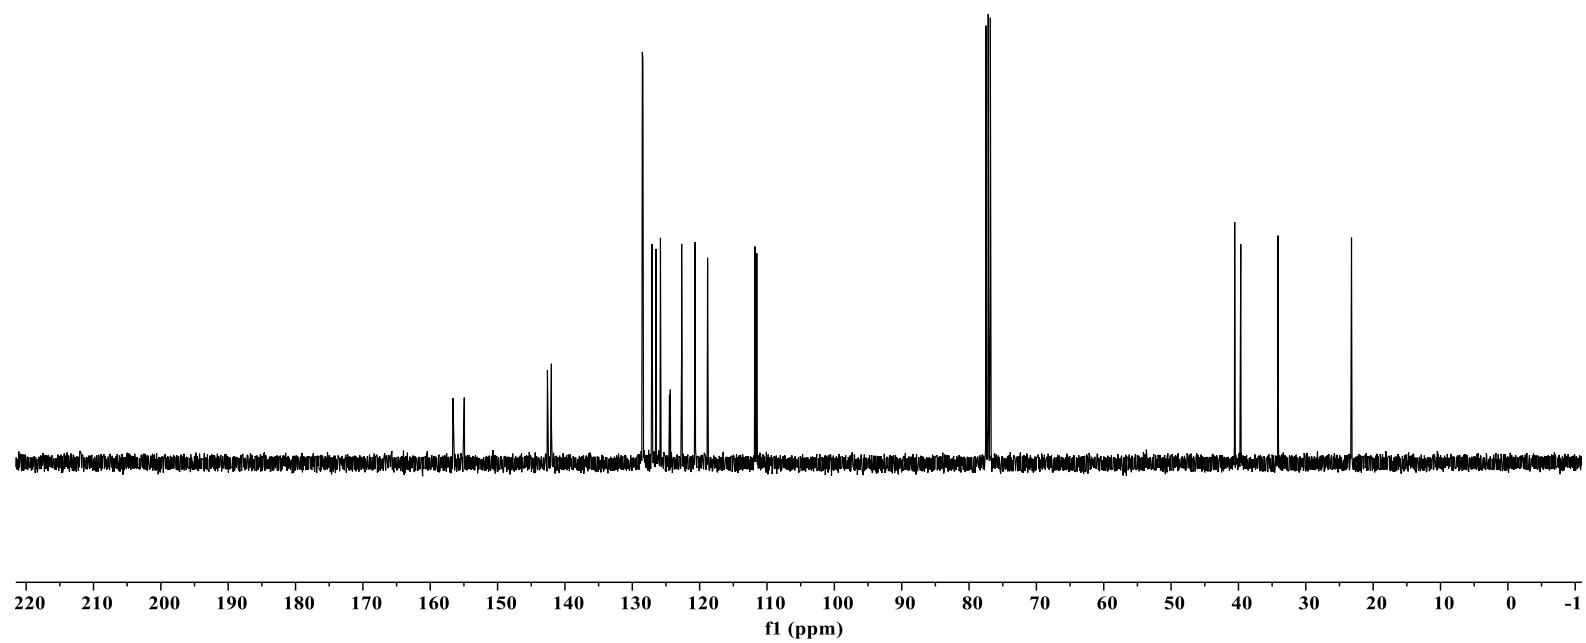

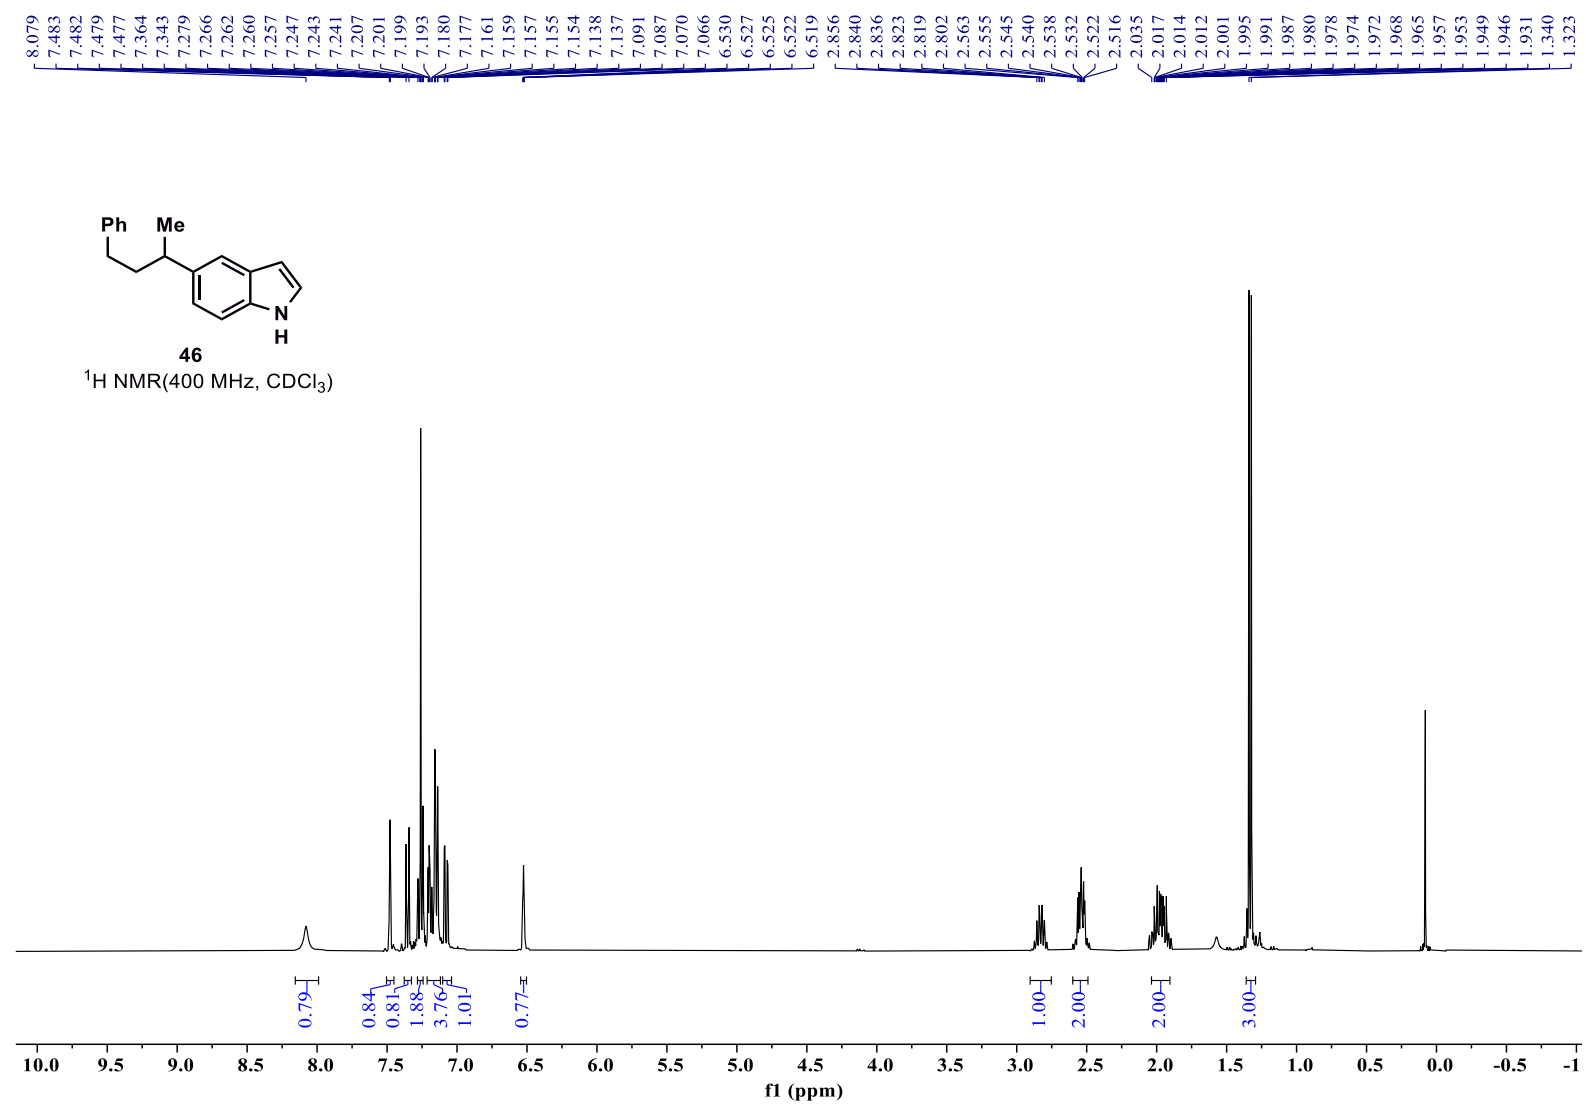

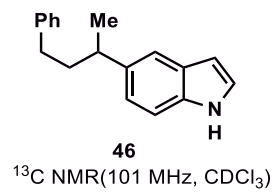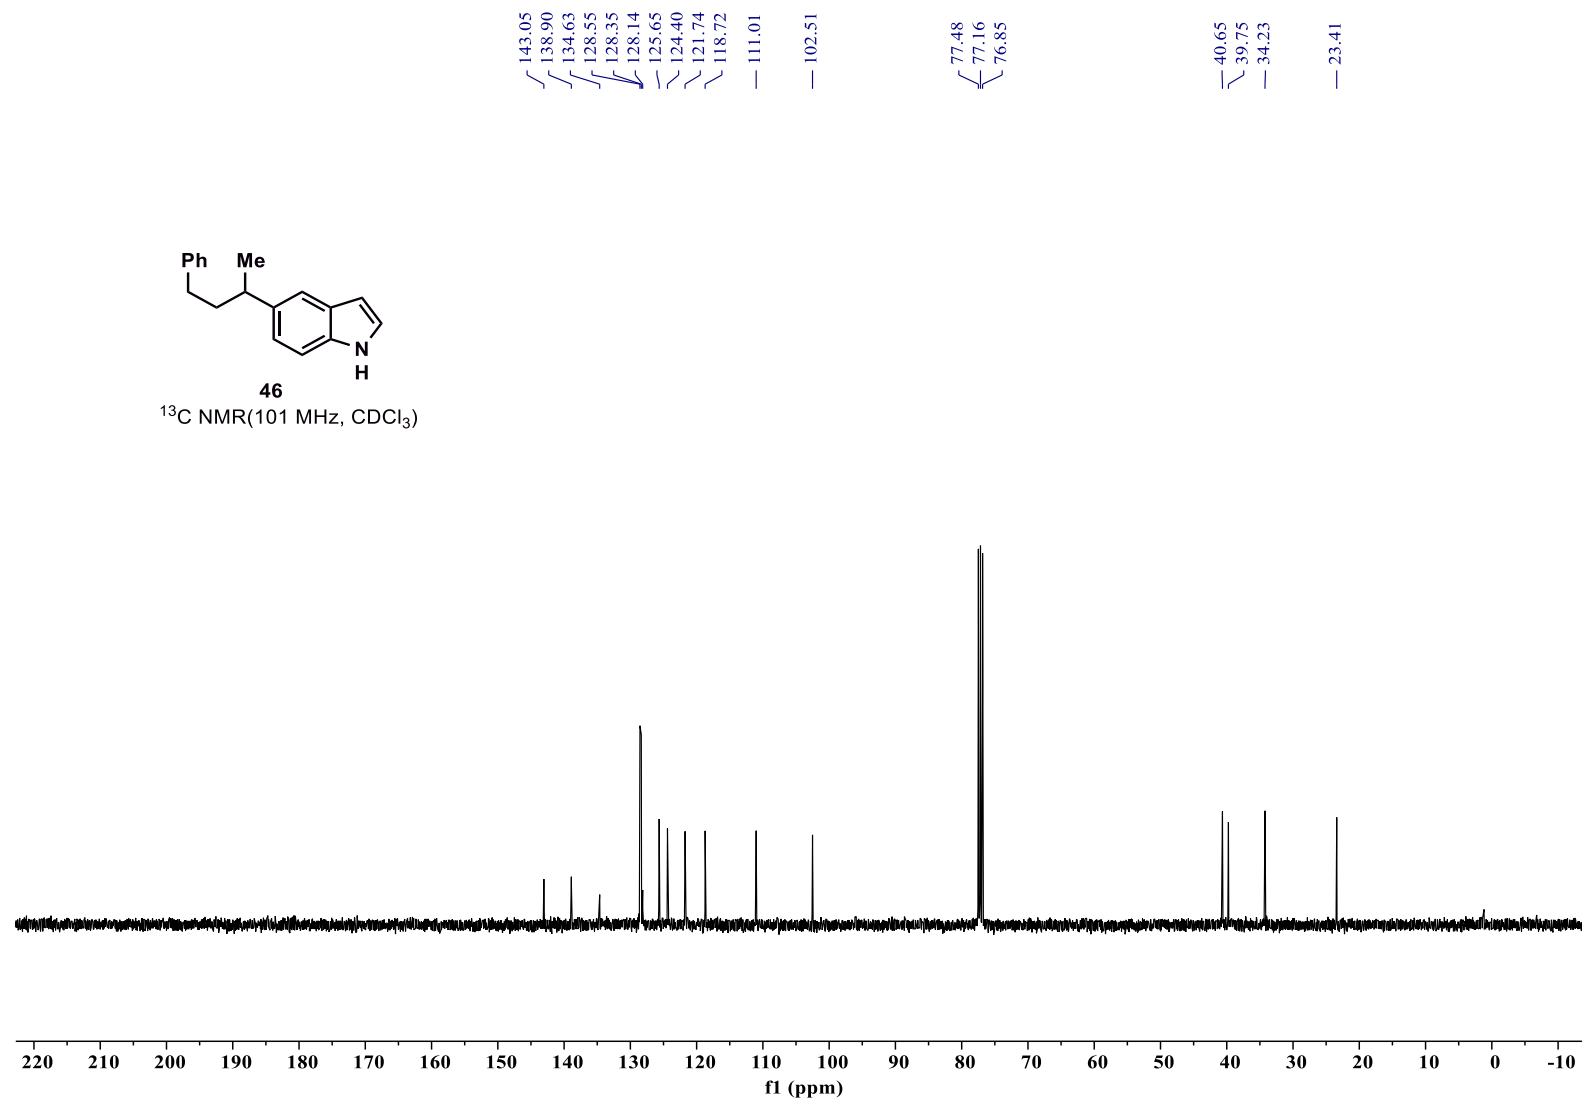

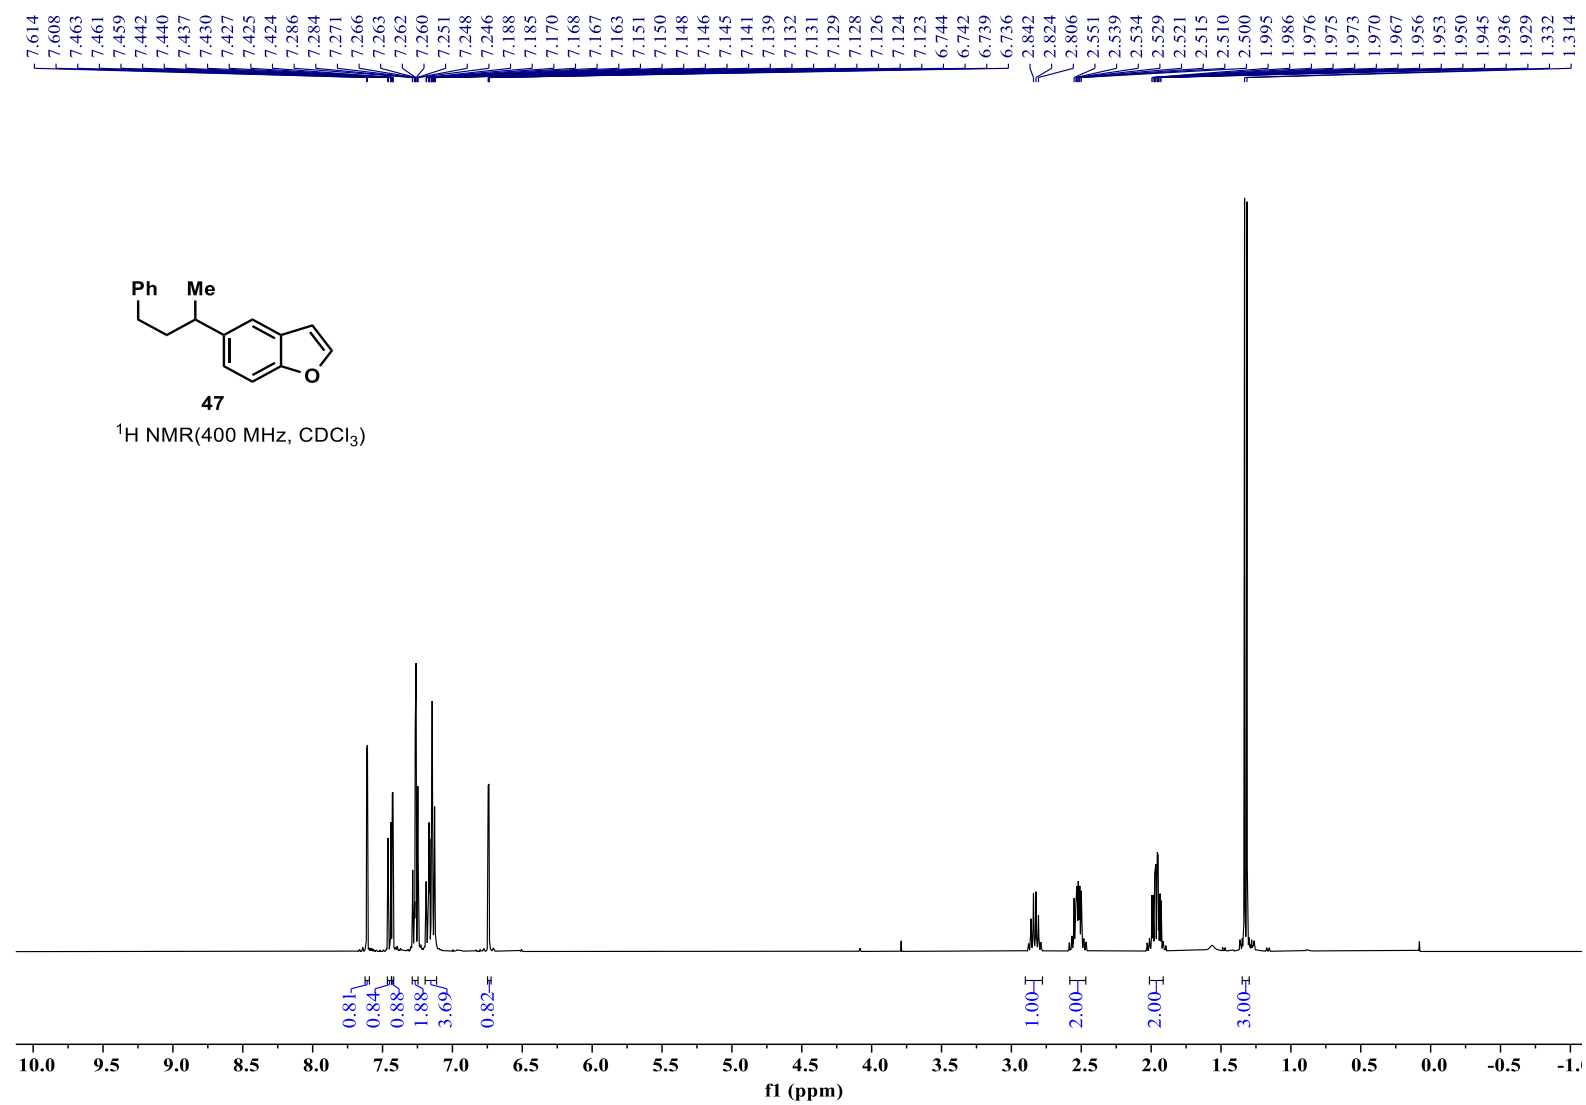

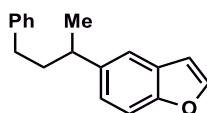

47

$^{13}\text{C}$  NMR(101 MHz,  $\text{CDCl}_3$ )

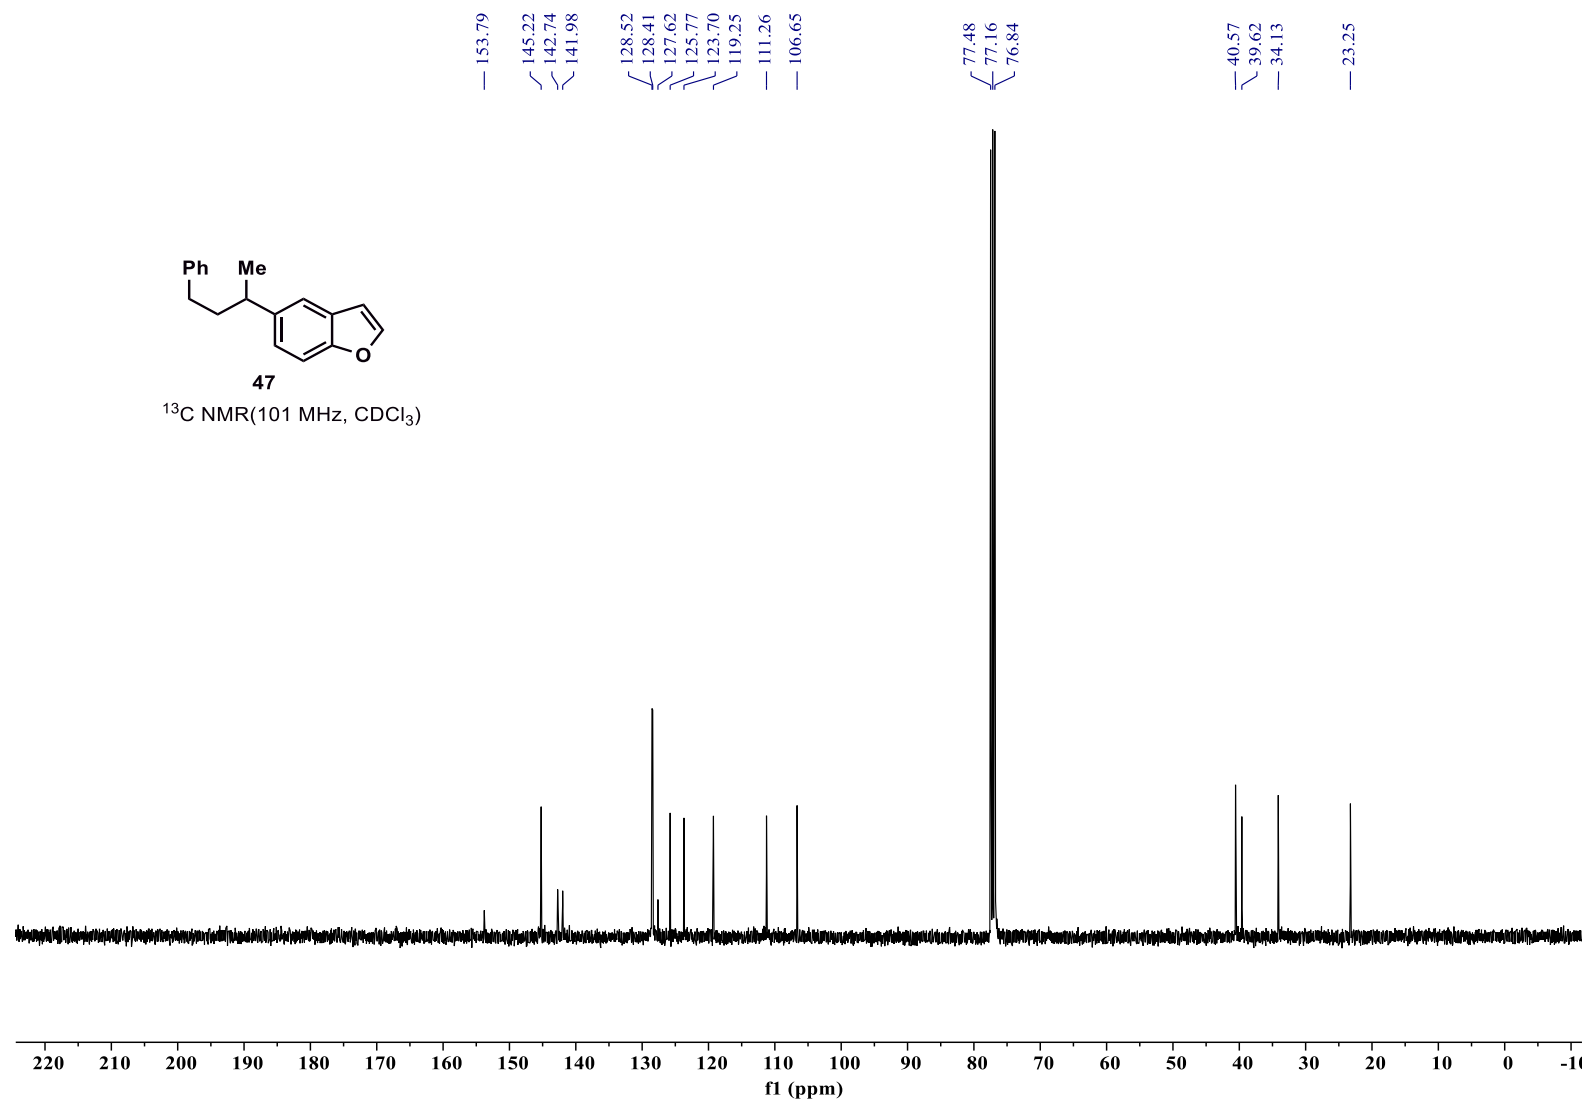

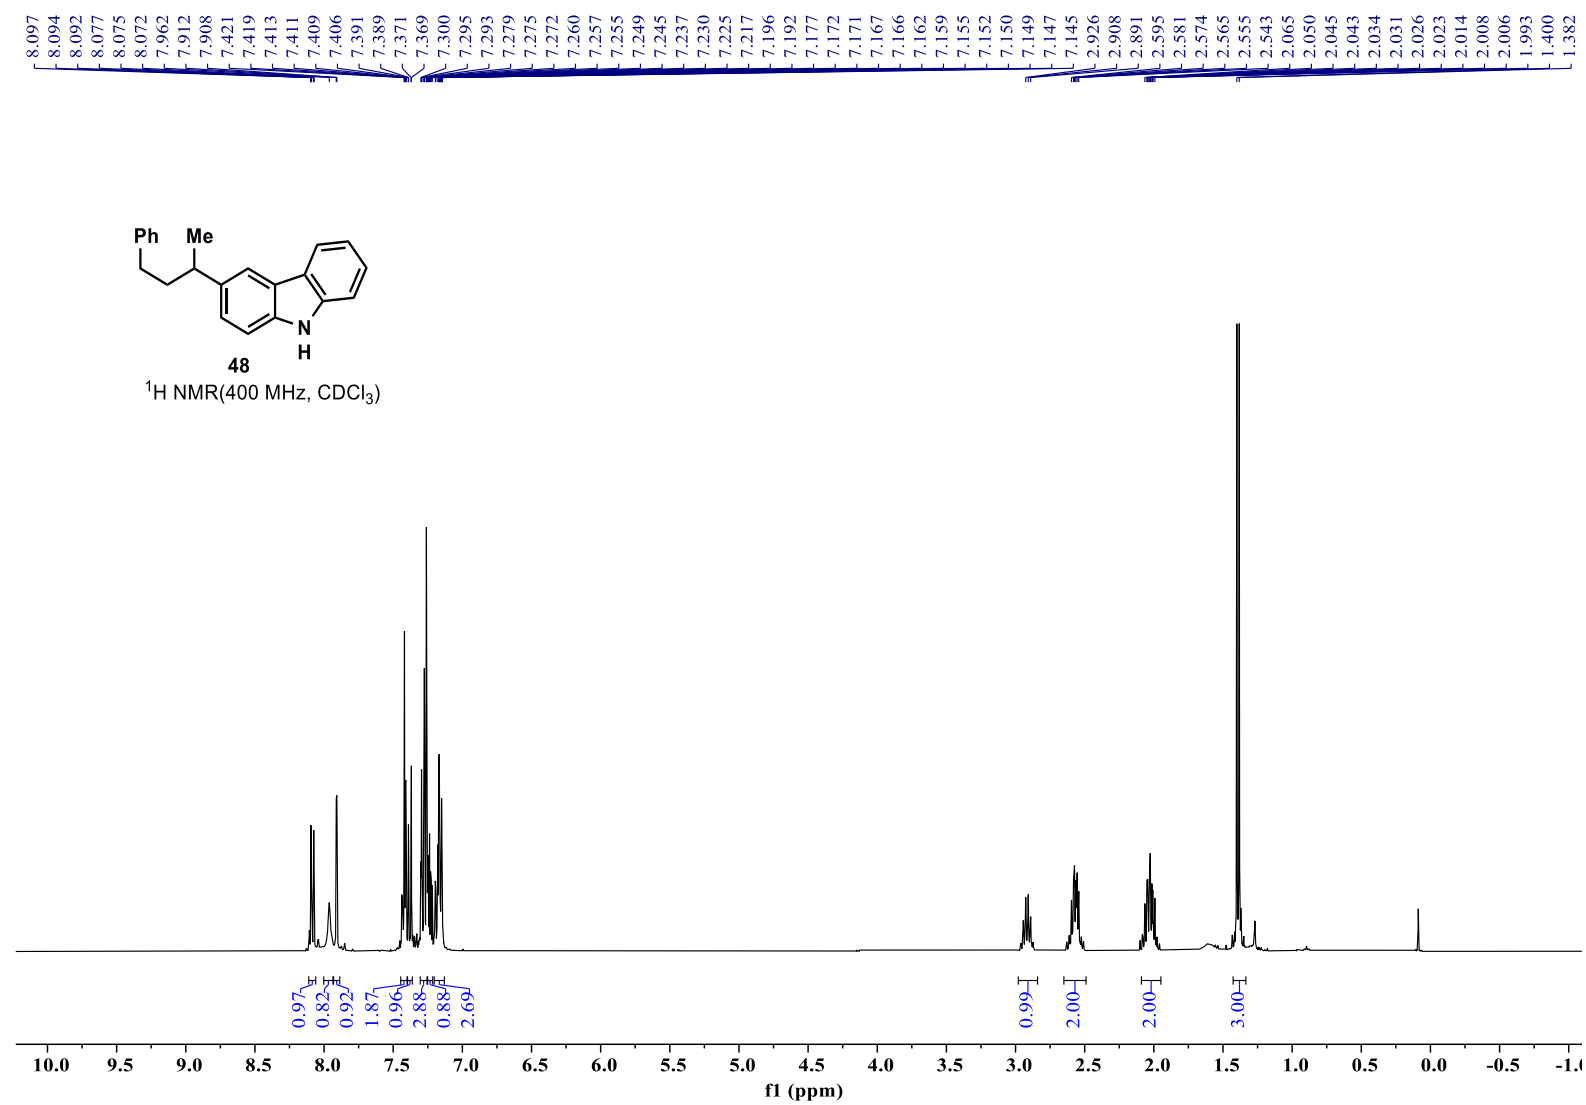

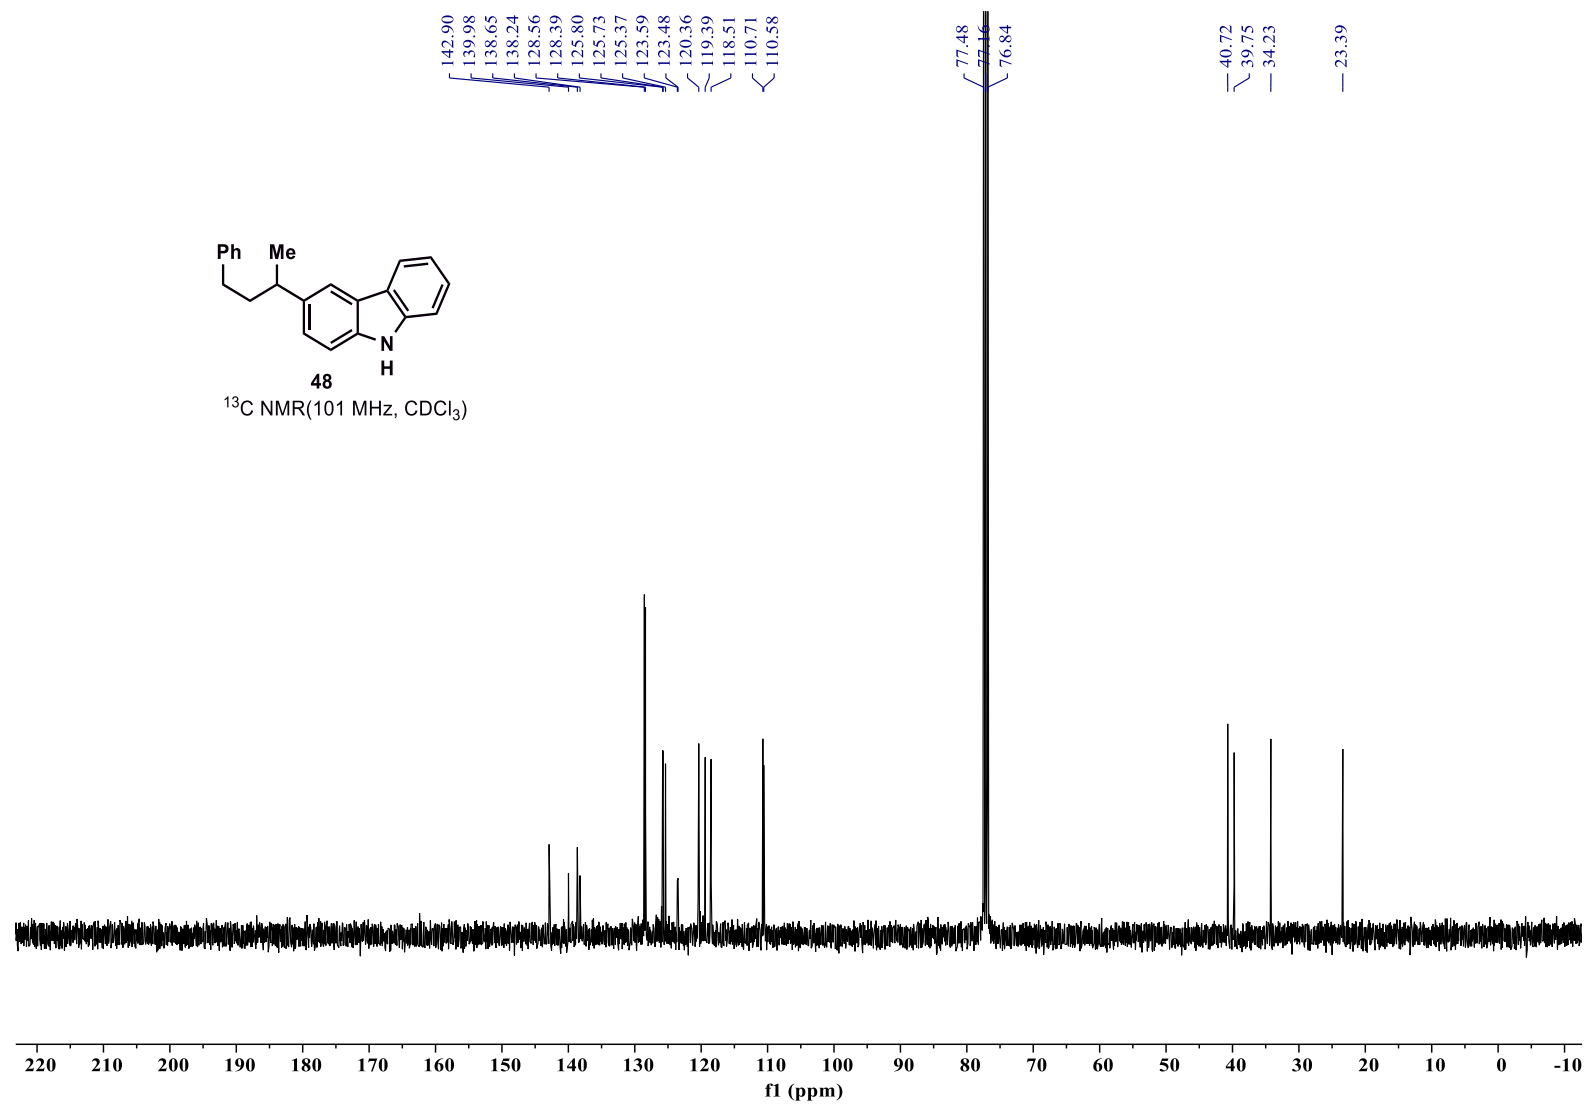

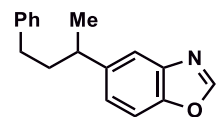

**49**

<sup>1</sup>H NMR(400 MHz, CDCl<sub>3</sub>)

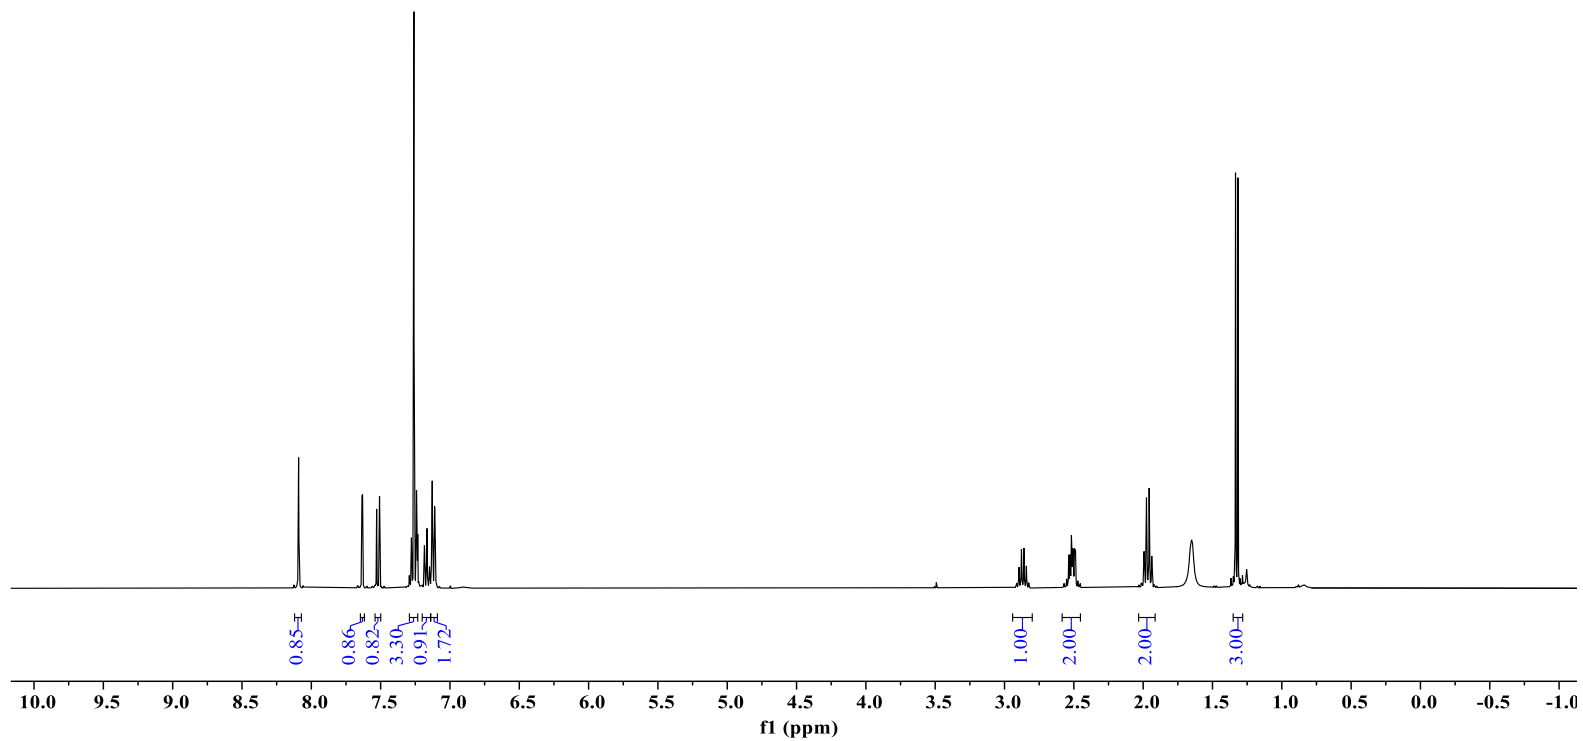

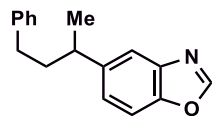

**49**

$^{13}\text{C}$  NMR(101 MHz,  $\text{CDCl}_3$ )

152.86  
148.64  
144.31  
142.43  
140.41  
128.48  
128.44  
125.84  
125.08  
118.67  
110.71

77.48  
77.16  
76.84

40.44  
39.63  
34.00

23.14

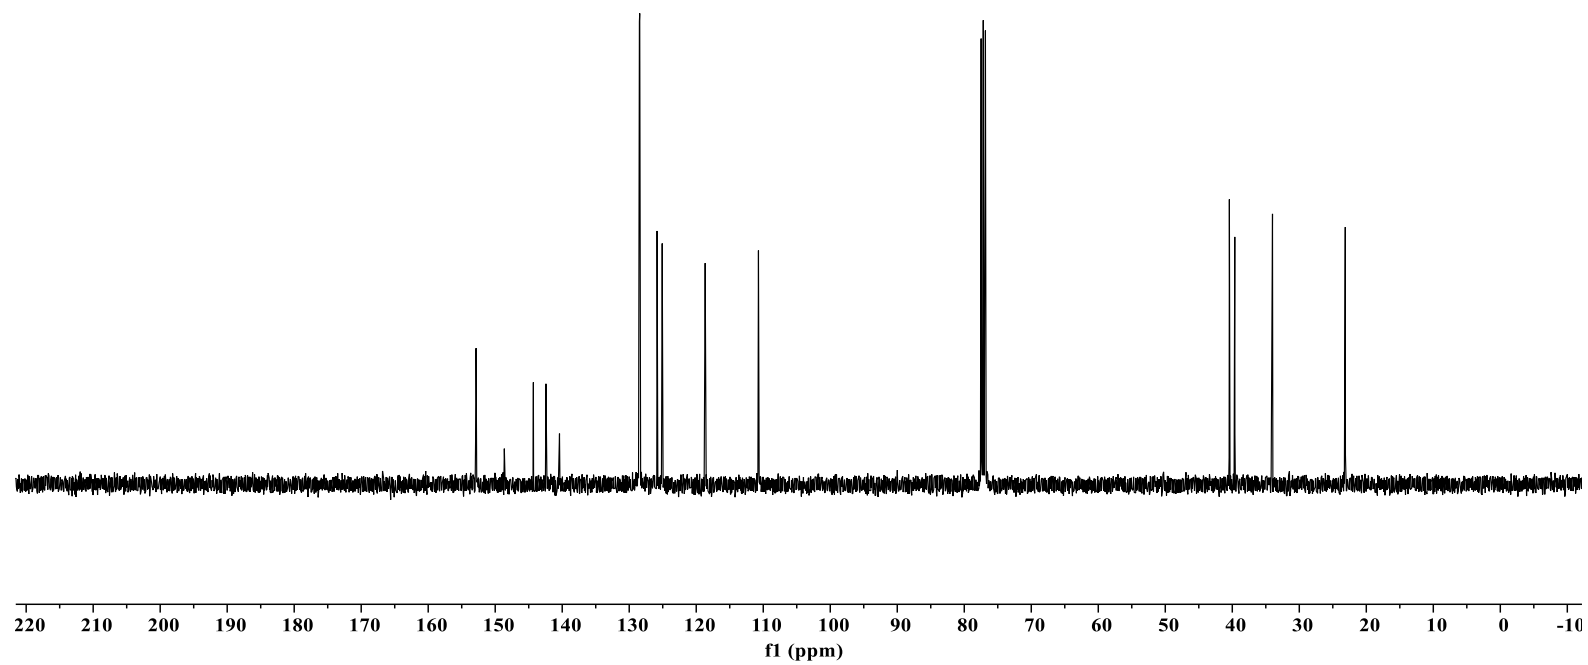

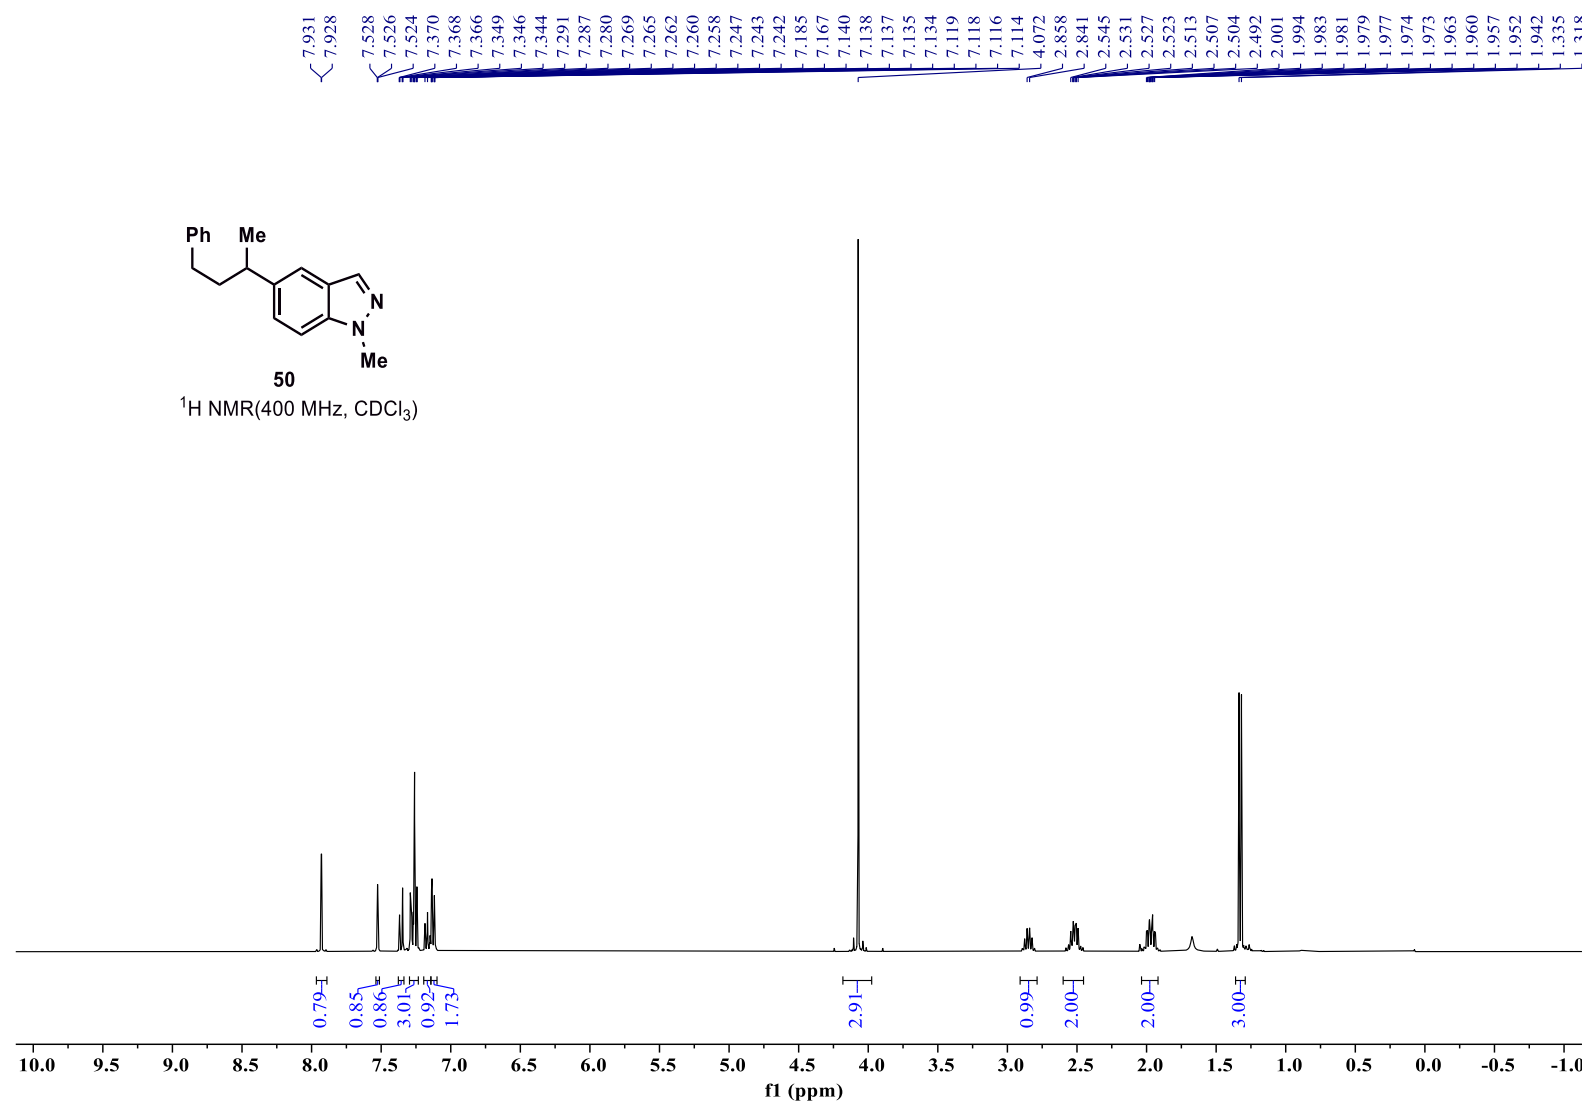

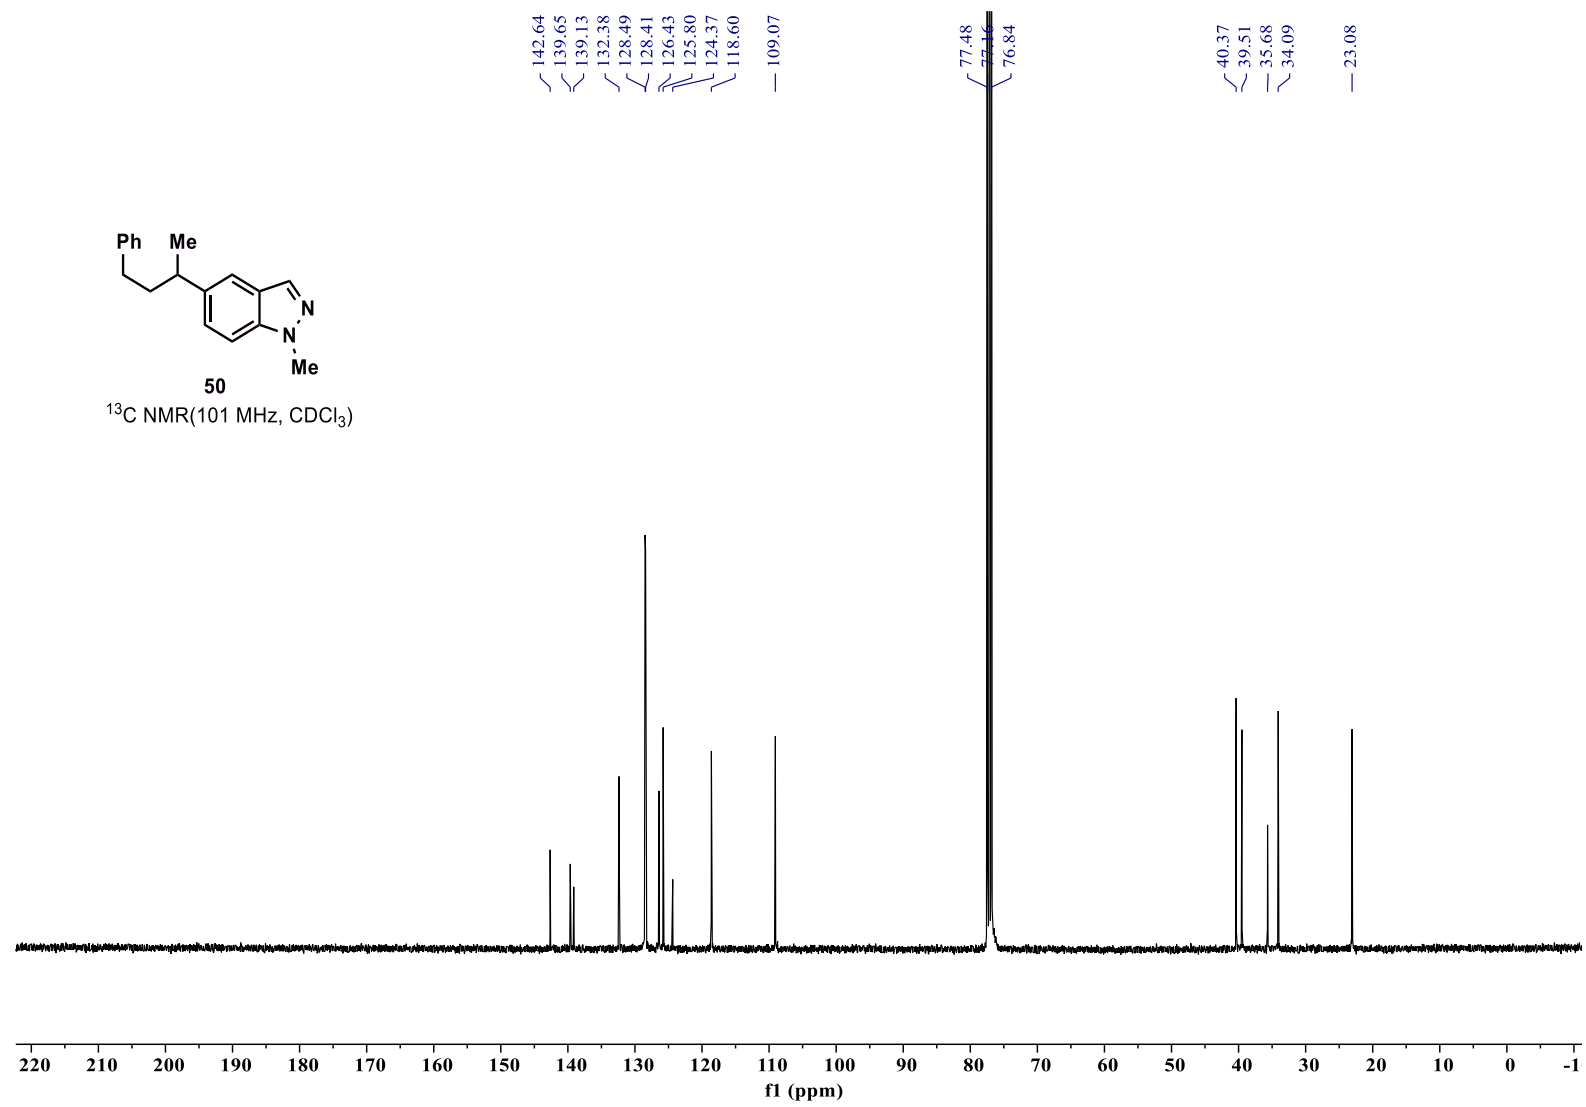

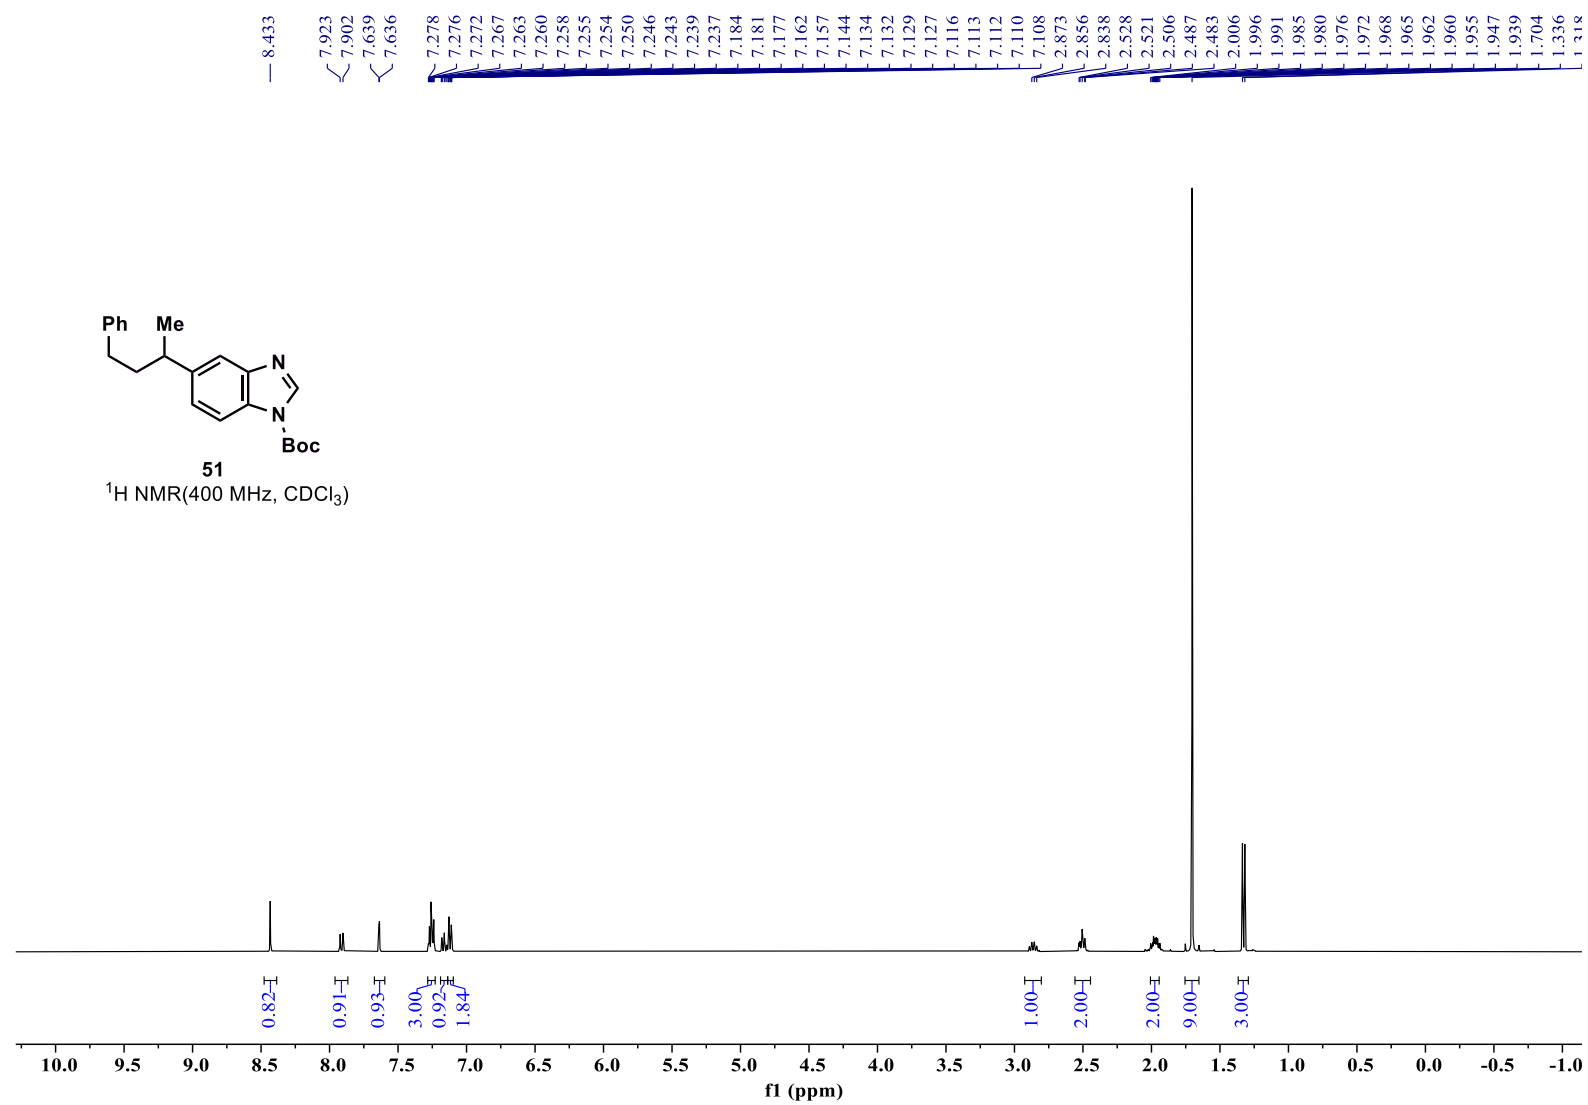

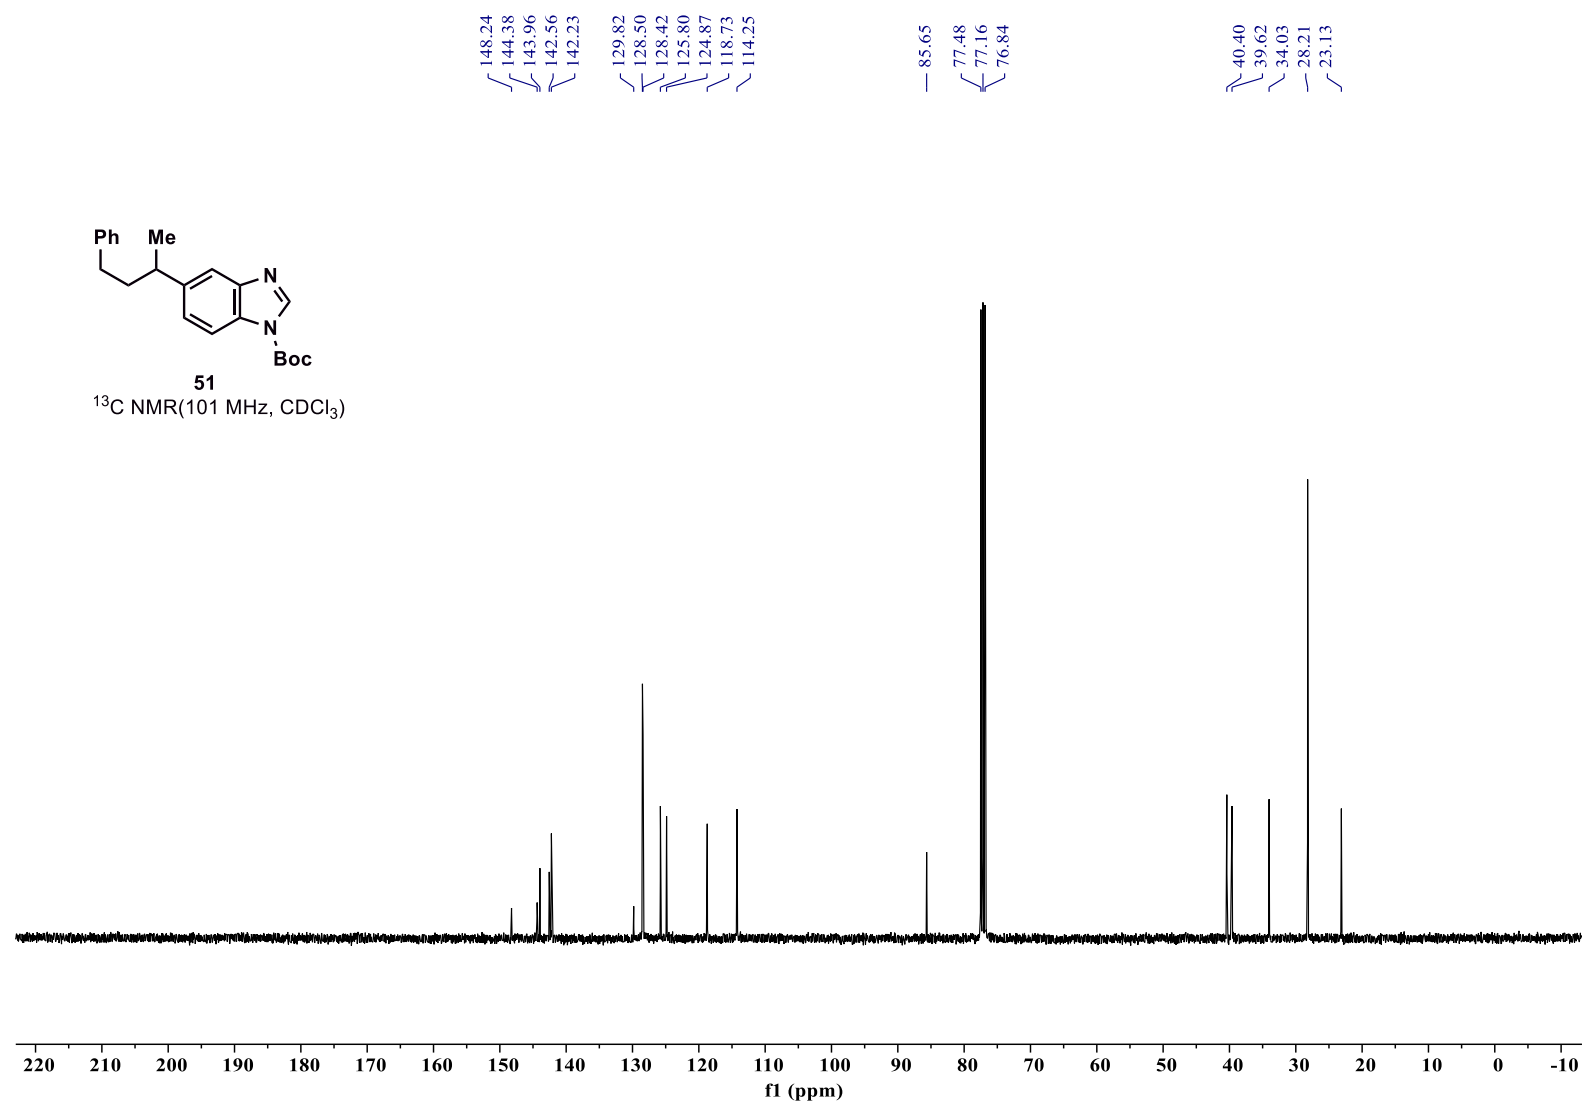

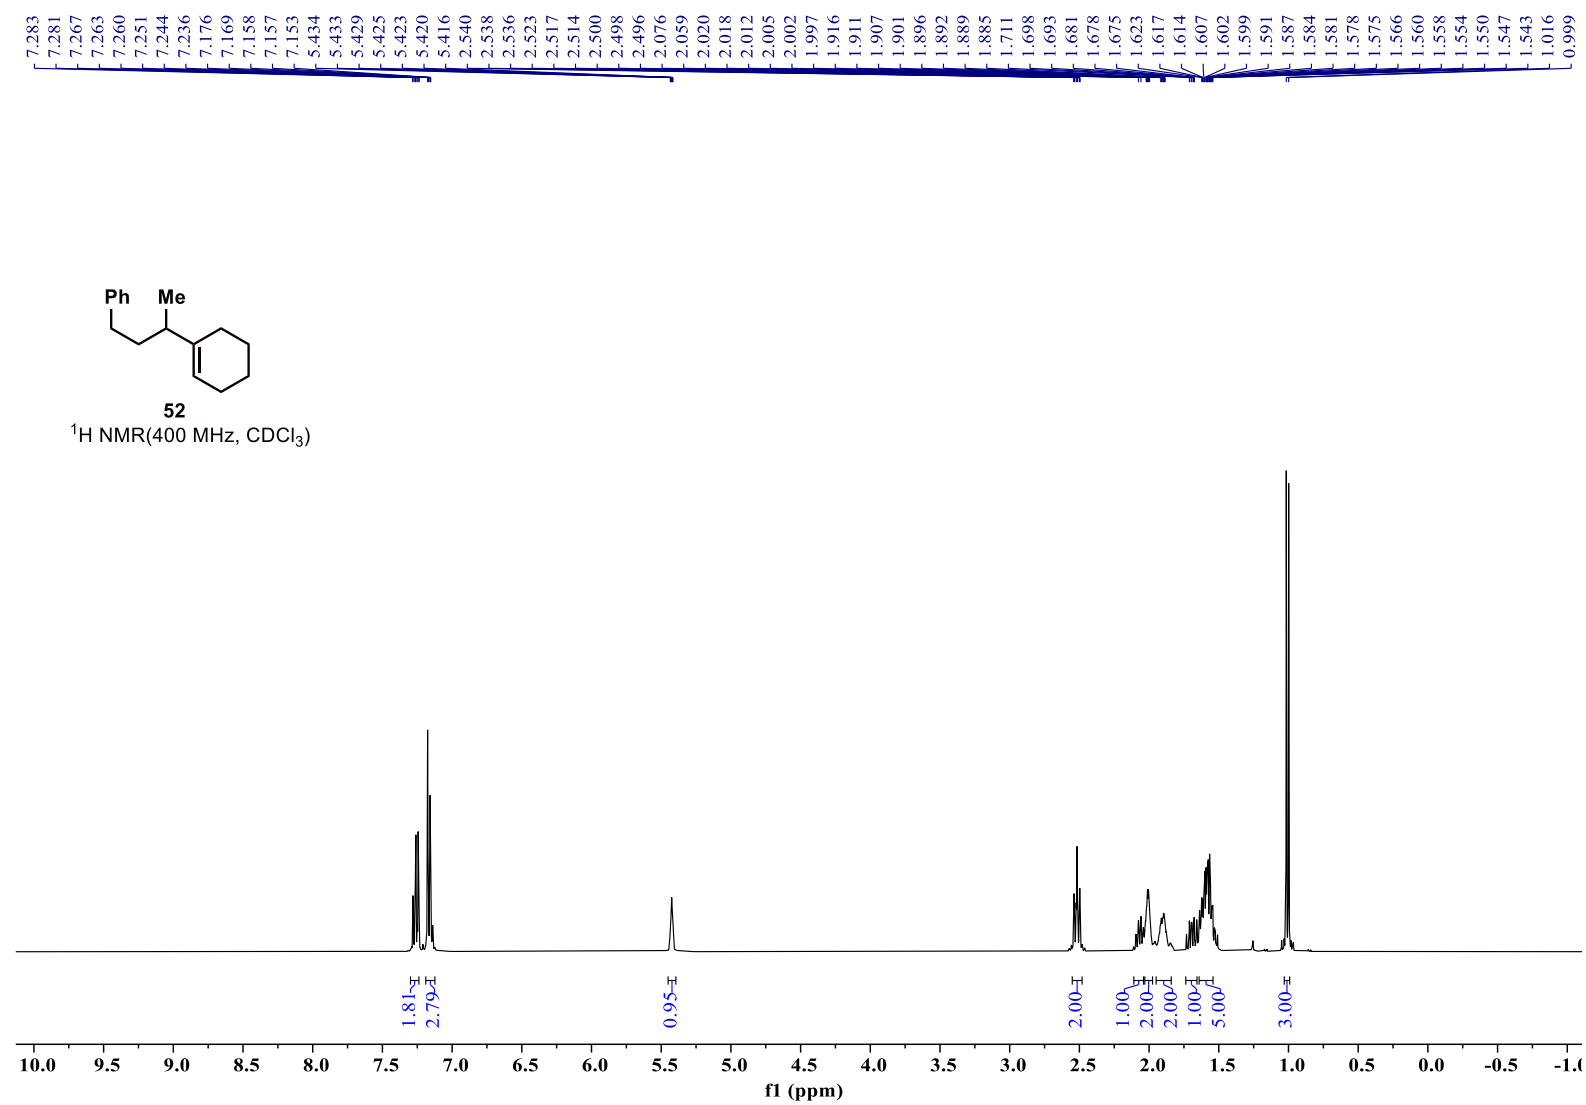

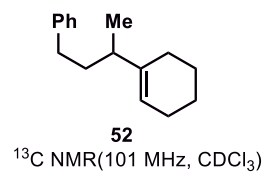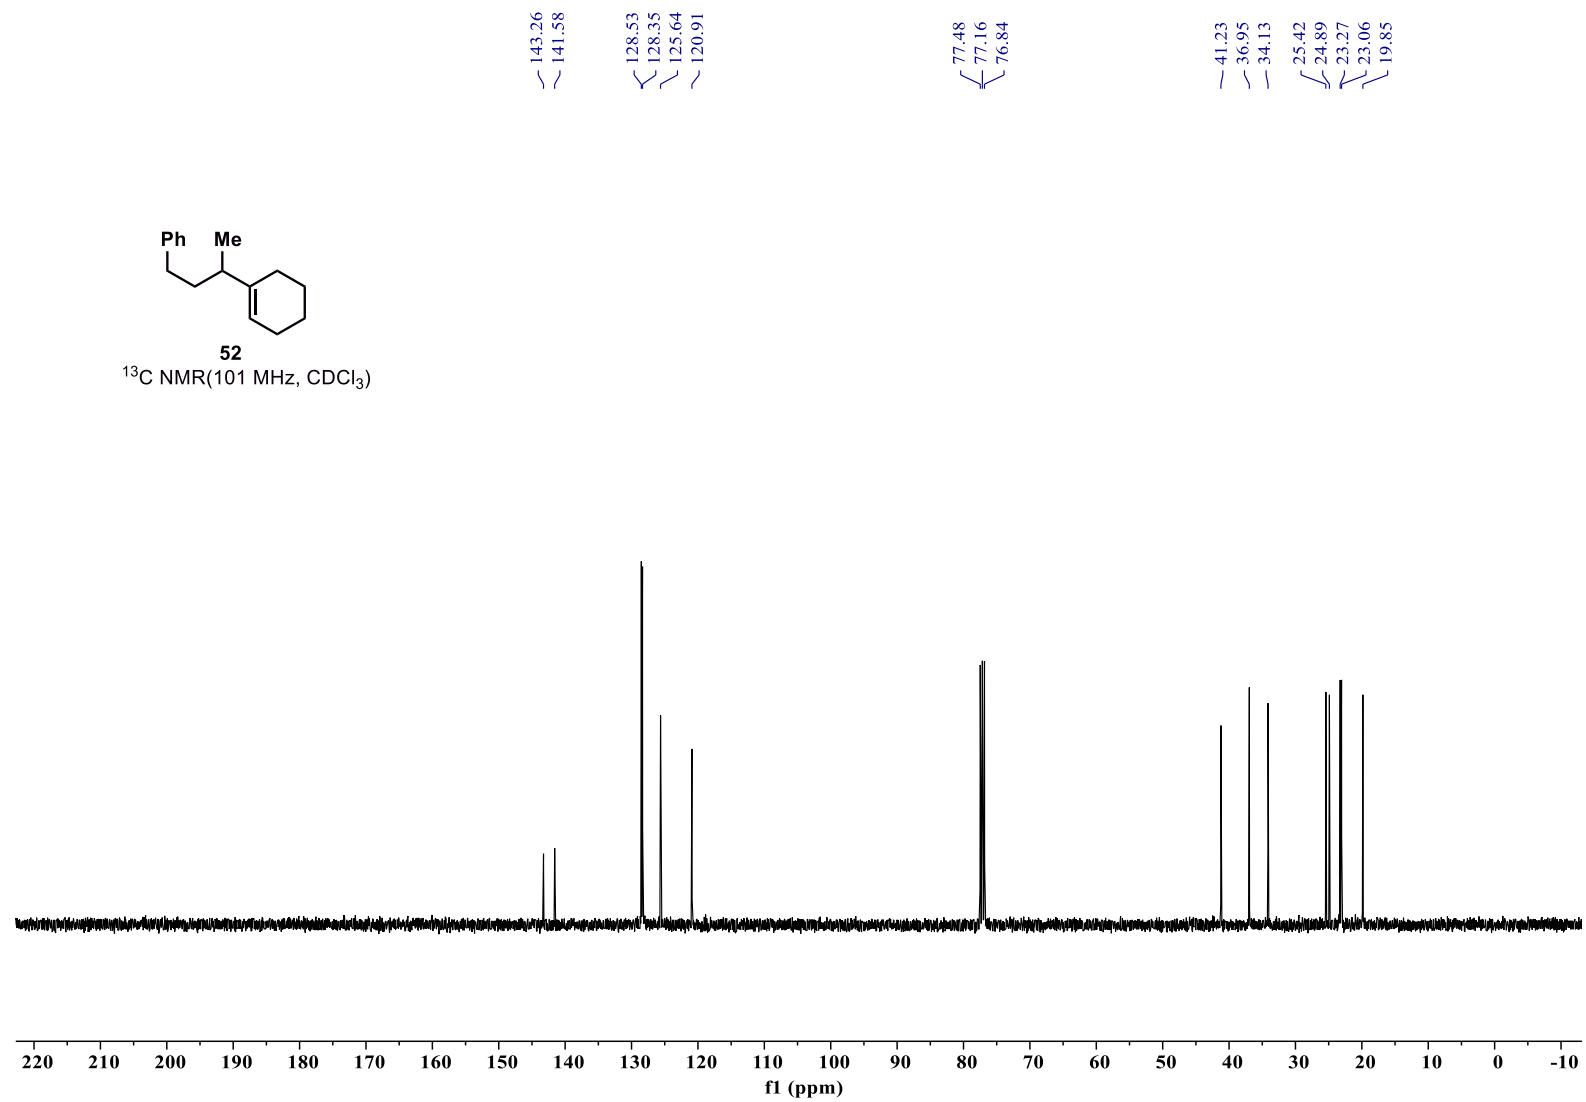

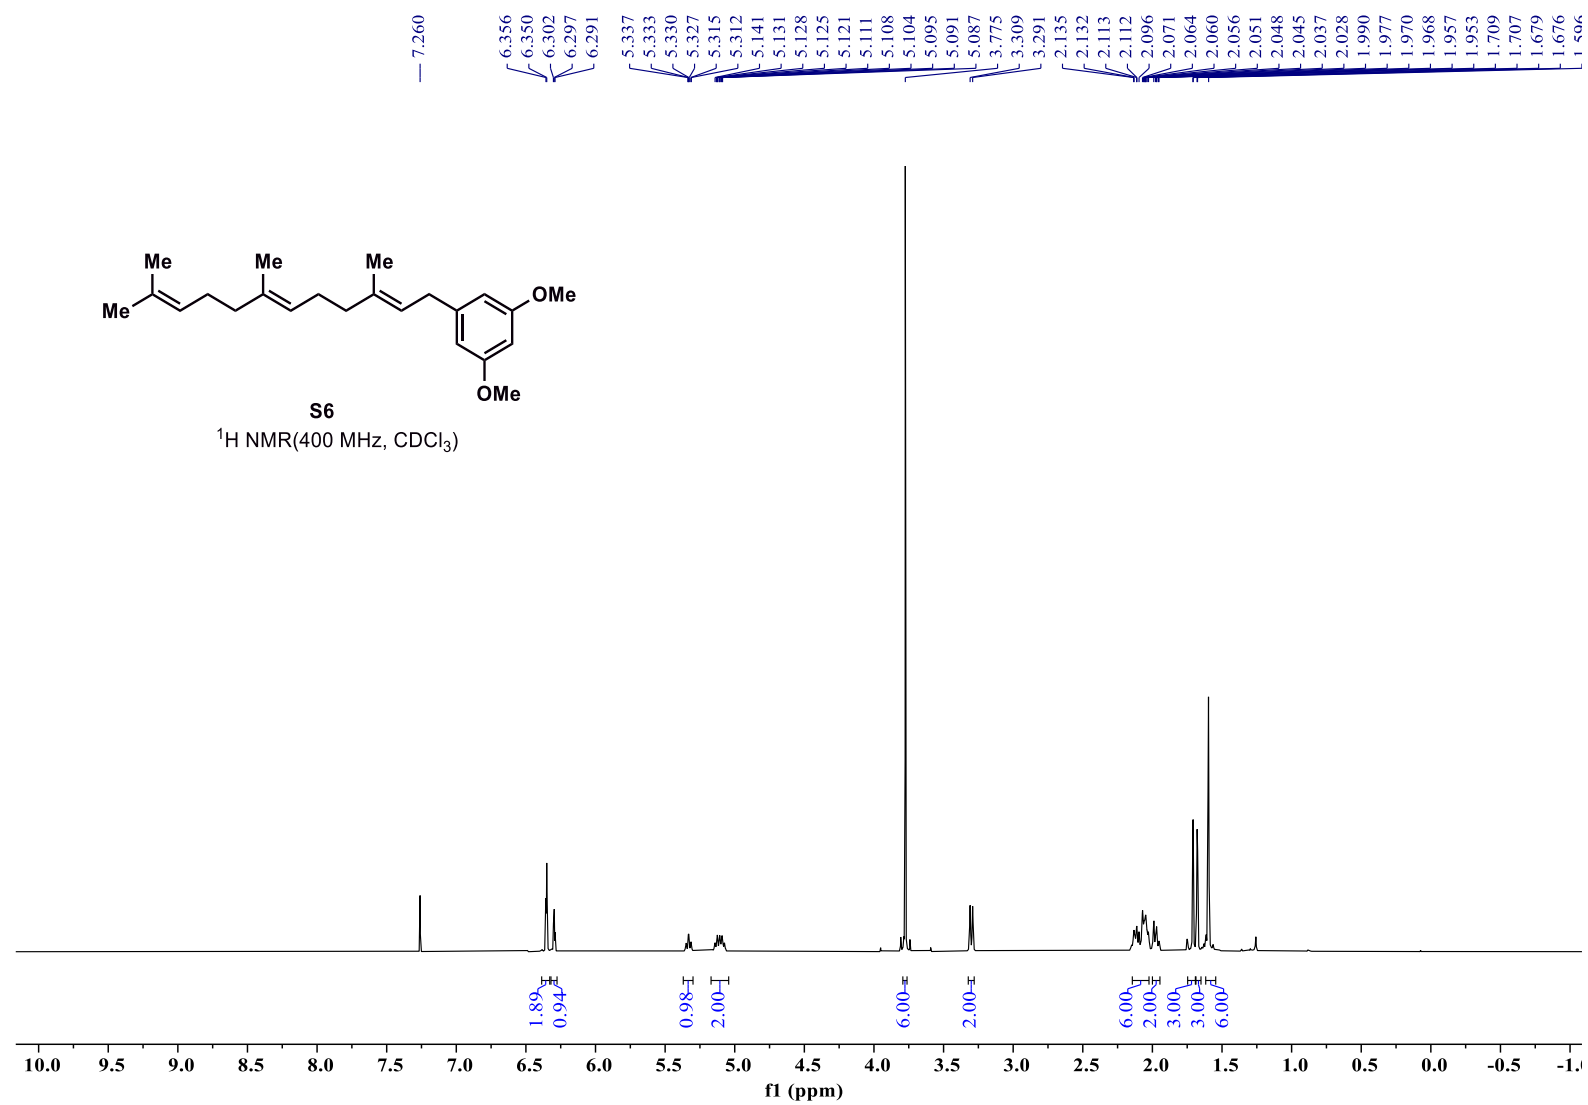

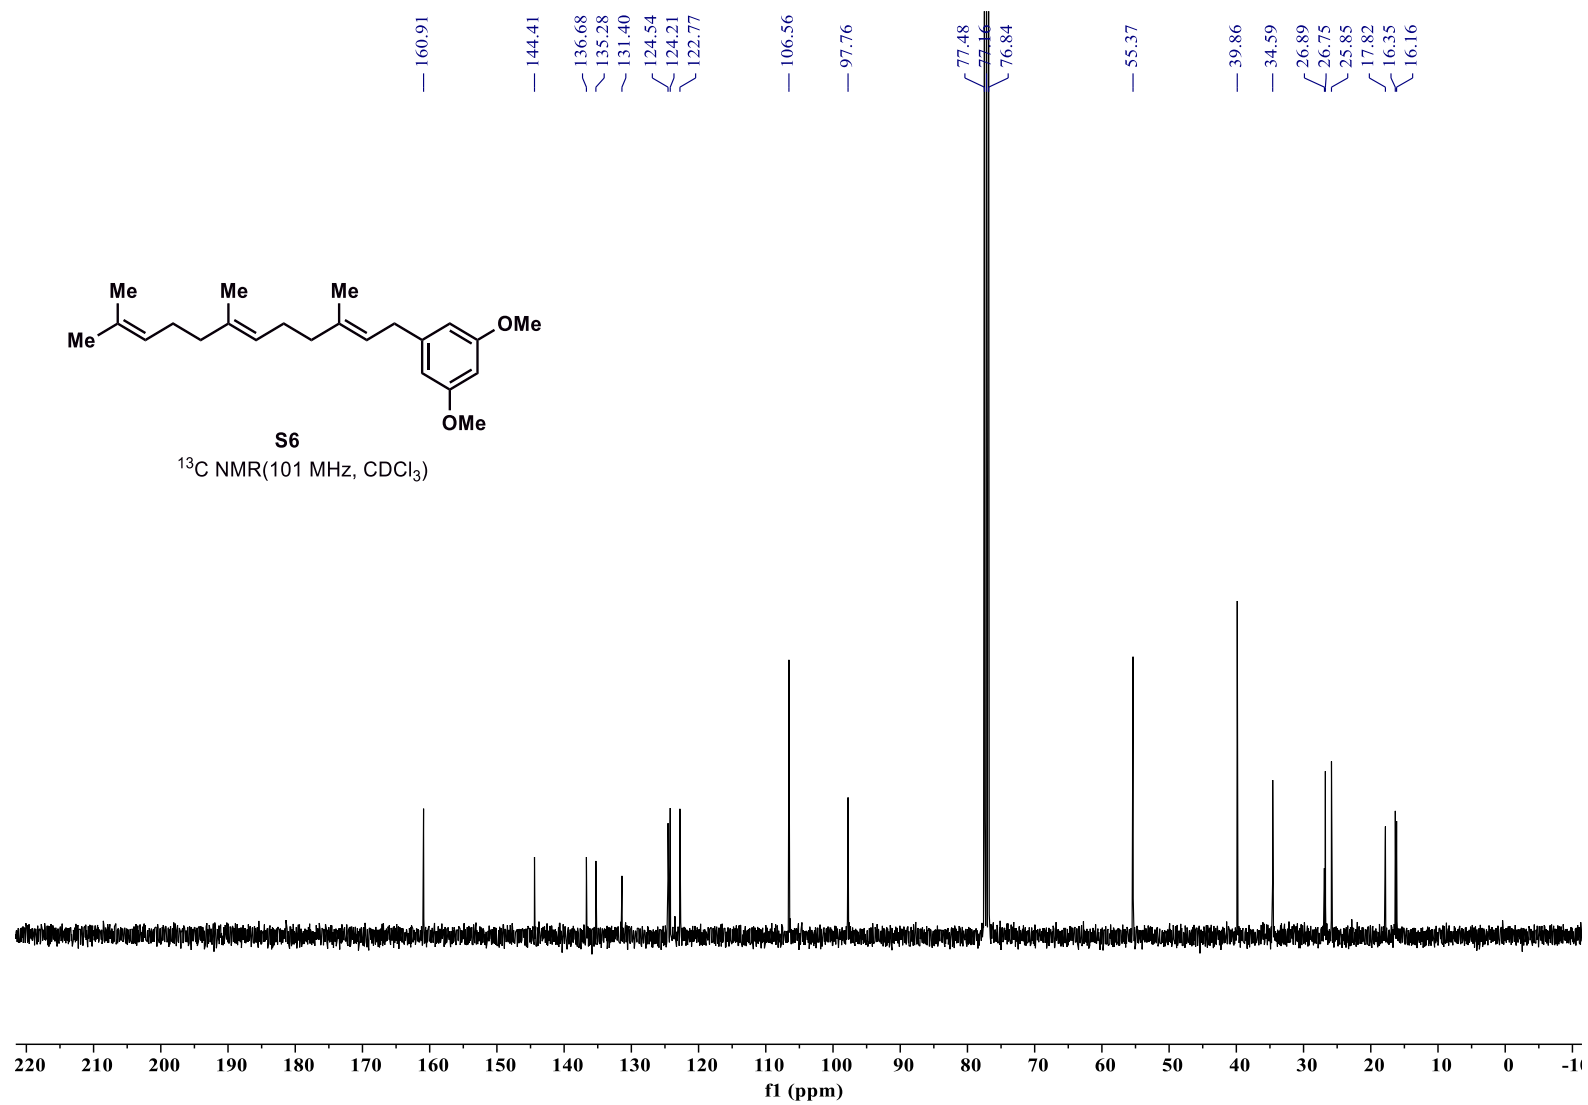

Supplement: Supplementary file 1 [file 26589236]
